# Supplementary material
Source: publisher figshare collection journal article supplement (https://gsapubs.figshare.com/articles/dataset/_/12541403)
Supplement: Supplementary file 1 [file 1]

## Sheet: S1 - Geologic Mapping Data
Collins, B.D. and Reid, M.E., 2019, Enhanced landslide mobility by basal liquefaction: The 2014 State Route 530 (Oso), Washington, landslide, GSA Bulletin, https://doi.org/10.1130/B35146.1.
SUPPLEMENTAL DATA SHEET S1: GEOLOGIC MAPPING DATA
General Notes:
1. The geologic mapping presented in Fig. 4 has been compiled from a number of sources including field mapping performed from April 2014 through July 2016.
2. The locations of geologic units identified during this field mapping are presented here. The final mapping used these observations to synthesize a generalized landslide deposit map.
3. Point numbers are arbitrarily assigned with no pattern to their order.
4. Note that all geologic units described are landslide debris composed of the parent lithologic units.
5. The geologic units Qgoe, Qgtv, Qgov, and Qglv are as described in the text and reference lithologic units described by Dragovich et al., 2003.
6. The geologic unit Qgund is associated with undifferentiated materials (i.e., hummocks composed of a mix of geologic units, and undifferentiated sand and gravel landslide deposits).
7. The geologic unit Qgcoll is associated with 2014 landslide deposits sourced from former colluvial deposits of the Paleo component. These are undifferentiated former glacial deposits that likely formed part of the former Paleo landslide complex before subsequently mobilizing as part of the 2014 landslide.
8. Latitude and longitude are referenced to the North American Datum of 1983 (NAD83) in decimal degrees. All latitude values are North (+); all longitude values are West (-).
Point number	Geologic unit	Latitude	Longitude
		(degrees)	(degrees)
1	Qgoe	48.2761	-121.849
2	Qgoe	48.276	-121.849
3	Qgoe	48.276	-121.849
4	Qgoe	48.2764	-121.849
5	Qgoe	48.2767	-121.849
6	Qgoe	48.2774	-121.848
7	Qgoe	48.2776	-121.848
8	Qgoe	48.2771	-121.848
9	Qgoe	48.2776	-121.849
10	Qgoe	48.2768	-121.847
11	Qgoe	48.2769	-121.847
12	Qgoe	48.2775	-121.847
13	Qgoe	48.2769	-121.847
14	Qgoe	48.2771	-121.847
15	Qgoe	48.2774	-121.846
16	Qgoe	48.276	-121.846
17	Qgoe	48.2775	-121.842
18	Qgoe	48.2771	-121.842
19	Qgoe	48.2773	-121.843
20	Qgoe	48.2785	-121.847
21	Qgoe	48.2786	-121.847
22	Qgoe	48.2782	-121.847
23	Qgoe	48.2781	-121.848
24	Qgoe	48.278	-121.848
25	Qgoe	48.2782	-121.849
26	Qgoe	48.2781	-121.848
27	Qgoe	48.2783	-121.848
28	Qgoe	48.2789	-121.848
29	Qgoe	48.2788	-121.849
30	Qgoe	48.2796	-121.847
31	Qgoe	48.2803	-121.847
32	Qgoe	48.2804	-121.847
33	Qgoe	48.2789	-121.836
34	Qgoe	48.2782	-121.838
35	Qgoe	48.2783	-121.838
36	Qgoe	48.2782	-121.839
37	Qgoe	48.2782	-121.84
38	Qgoe	48.2785	-121.839
39	Qgoe	48.2786	-121.84
40	Qgoe	48.2788	-121.84
41	Qgoe	48.2791	-121.839
42	Qgoe	48.2784	-121.839
43	Qgoe	48.2864	-121.852
44	Qgoe	48.2858	-121.853
45	Qgoe	48.2855	-121.849
46	Qgoe	48.2846	-121.848
47	Qgoe	48.2836	-121.848
48	Qgoe	48.2838	-121.848
49	Qgoe	48.284	-121.847
50	Qgoe	48.284	-121.848
51	Qgoe	48.2846	-121.848
52	Qgoe	48.2847	-121.848
53	Qgoe	48.2835	-121.847
54	Qgoe	48.2833	-121.848
55	Qgoe	48.2833	-121.849
56	Qgoe	48.2833	-121.849
57	Qgoe	48.2812	-121.847
58	Qgoe	48.2811	-121.847
59	Qgoe	48.2811	-121.847
60	Qgoe	48.2806	-121.847
61	Qgoe	48.2813	-121.85
62	Qgoe	48.2827	-121.846
63	Qgoe	48.2829	-121.845
64	Qgoe	48.2822	-121.846
65	Qgoe	48.2824	-121.846
66	Qgoe	48.2824	-121.846
67	Qgoe	48.2825	-121.846
68	Qgoe	48.2826	-121.846
69	Qgoe	48.2826	-121.846
70	Qgoe	48.2822	-121.846
71	Qgoe	48.2821	-121.846
72	Qgoe	48.2819	-121.846
73	Qgoe	48.2819	-121.846
74	Qgoe	48.2818	-121.846
75	Qgoe	48.2817	-121.846
76	Qgoe	48.2816	-121.846
77	Qgoe	48.2816	-121.846
78	Qgoe	48.2815	-121.846
79	Qgoe	48.2814	-121.846
80	Qgoe	48.2814	-121.846
81	Qgoe	48.2814	-121.846
82	Qgoe	48.2814	-121.847
83	Qgoe	48.2814	-121.847
84	Qgoe	48.2813	-121.847
85	Qgoe	48.2812	-121.847
86	Qgoe	48.2811	-121.847
87	Qgoe	48.2812	-121.847
88	Qgoe	48.2811	-121.847
89	Qgoe	48.2812	-121.846
90	Qgoe	48.2813	-121.846
91	Qgoe	48.2814	-121.846
92	Qgoe	48.2809	-121.847
93	Qgoe	48.2808	-121.847
94	Qgoe	48.2808	-121.847
95	Qgoe	48.2806	-121.847
96	Qgoe	48.2806	-121.847
97	Qgoe	48.2806	-121.847
98	Qgoe	48.2806	-121.846
99	Qgoe	48.2807	-121.846
100	Qgoe	48.2813	-121.845
101	Qgoe	48.2815	-121.844
102	Qgoe	48.2818	-121.844
103	Qgoe	48.2817	-121.844
104	Qgoe	48.2821	-121.843
105	Qgoe	48.2813	-121.844
106	Qgoe	48.2813	-121.843
107	Qgoe	48.2807	-121.844
108	Qgoe	48.281	-121.843
109	Qgoe	48.281	-121.843
110	Qgoe	48.2805	-121.847
111	Qgoe	48.2795	-121.847
112	Qgoe	48.2784	-121.843
113	Qgoe	48.2783	-121.843
114	Qgoe	48.2783	-121.843
115	Qgoe	48.2783	-121.843
116	Qgoe	48.2784	-121.844
117	Qgoe	48.2781	-121.844
118	Qgoe	48.2781	-121.843
119	Qgoe	48.278	-121.843
120	Qgoe	48.278	-121.843
121	Qgoe	48.2778	-121.843
122	Qgoe	48.2777	-121.843
123	Qgoe	48.2785	-121.843
124	Qgoe	48.2785	-121.843
125	Qgoe	48.2786	-121.843
126	Qgoe	48.2788	-121.843
127	Qgoe	48.279	-121.843
128	Qgoe	48.2789	-121.843
129	Qgoe	48.2785	-121.844
130	Qgoe	48.2784	-121.844
131	Qgoe	48.2784	-121.844
132	Qgoe	48.2784	-121.844
133	Qgoe	48.2785	-121.844
134	Qgoe	48.2786	-121.845
135	Qgoe	48.2786	-121.844
136	Qgoe	48.2782	-121.844
137	Qgoe	48.2777	-121.846
138	Qgoe	48.2781	-121.846
139	Qgoe	48.278	-121.846
140	Qgoe	48.2783	-121.847
141	Qgoe	48.2781	-121.847
142	Qgoe	48.2781	-121.847
143	Qgoe	48.2785	-121.847
144	Qgoe	48.2787	-121.846
145	Qgoe	48.279	-121.846
146	Qgoe	48.2789	-121.845
147	Qgoe	48.2789	-121.845
148	Qgoe	48.279	-121.845
149	Qgoe	48.2791	-121.844
150	Qgoe	48.2791	-121.844
151	Qgoe	48.2793	-121.844
152	Qgoe	48.2792	-121.844
153	Qgoe	48.2791	-121.844
154	Qgoe	48.2791	-121.844
155	Qgoe	48.2793	-121.843
156	Qgoe	48.2795	-121.843
157	Qgoe	48.2795	-121.843
158	Qgoe	48.2796	-121.843
159	Qgoe	48.2797	-121.843
160	Qgoe	48.2782	-121.84
161	Qgoe	48.2785	-121.84
162	Qgoe	48.2786	-121.841
163	Qgoe	48.2788	-121.841
164	Qgoe	48.279	-121.841
165	Qgoe	48.2791	-121.841
166	Qgoe	48.279	-121.841
167	Qgoe	48.2789	-121.841
168	Qgoe	48.2787	-121.841
169	Qgoe	48.2789	-121.84
170	Qgoe	48.2788	-121.84
171	Qgoe	48.278	-121.841
172	Qgoe	48.2796	-121.842
173	Qgoe	48.2798	-121.843
174	Qgoe	48.2792	-121.843
175	Qgoe	48.2789	-121.842
176	Qgoe	48.2788	-121.842
177	Qgoe	48.2789	-121.842
178	Qgoe	48.2789	-121.842
179	Qgoe	48.2787	-121.842
180	Qgoe	48.2782	-121.841
181	Qgoe	48.2783	-121.841
182	Qgoe	48.2784	-121.841
183	Qgoe	48.2783	-121.841
184	Qgoe	48.2782	-121.842
185	Qgoe	48.2783	-121.841
186	Qgoe	48.2781	-121.842
187	Qgoe	48.278	-121.842
188	Qgoe	48.2779	-121.844
189	Qgoe	48.2779	-121.845
190	Qgoe	48.2779	-121.844
191	Qgoe	48.2779	-121.845
192	Qgoe	48.2778	-121.845
193	Qgoe	48.2778	-121.845
194	Qgoe	48.2793	-121.847
195	Qgoe	48.2797	-121.845
196	Qgoe	48.2795	-121.845
197	Qgoe	48.2798	-121.845
198	Qgoe	48.2798	-121.845
199	Qgoe	48.2847	-121.847
200	Qgoe	48.2857	-121.848
201	Qgoe	48.2856	-121.848
202	Qgoe	48.2855	-121.848
203	Qgoe	48.2855	-121.848
204	Qgoe	48.2854	-121.848
205	Qgoe	48.2852	-121.847
206	Qgoe	48.2853	-121.847
207	Qgoe	48.2852	-121.847
208	Qgoe	48.2851	-121.847
209	Qgoe	48.285	-121.847
210	Qgoe	48.2849	-121.848
211	Qgoe	48.2847	-121.848
212	Qgoe	48.2847	-121.848
213	Qgoe	48.2848	-121.847
214	Qgoe	48.2837	-121.85
215	Qgoe	48.2837	-121.85
216	Qgoe	48.2836	-121.85
217	Qgoe	48.2835	-121.85
218	Qgoe	48.2835	-121.85
219	Qgoe	48.283	-121.851
220	Qgoe	48.2831	-121.851
221	Qgoe	48.2832	-121.849
222	Qgoe	48.2832	-121.849
223	Qgoe	48.2831	-121.849
224	Qgoe	48.283	-121.849
225	Qgoe	48.283	-121.849
226	Qgoe	48.2838	-121.847
227	Qgoe	48.2819	-121.845
228	Qgoe	48.282	-121.845
229	Qgoe	48.282	-121.847
230	Qgoe	48.282	-121.847
231	Qgoe	48.2821	-121.845
232	Qgoe	48.2813	-121.846
233	Qgoe	48.2817	-121.844
234	Qgoe	48.2816	-121.843
235	Qgoe	48.2821	-121.843
236	Qgoe	48.282	-121.843
237	Qgoe	48.282	-121.843
238	Qgoe	48.2818	-121.843
239	Qgoe	48.2819	-121.844
240	Qgoe	48.2821	-121.844
241	Qgoe	48.282	-121.844
242	Qgoe	48.2822	-121.844
243	Qgoe	48.283	-121.844
244	Qgoe	48.283	-121.844
245	Qgoe	48.2764	-121.848
246	Qgoe	48.2766	-121.848
247	Qgoe	48.277	-121.848
248	Qgoe	48.2762	-121.848
249	Qgoe	48.2763	-121.848
250	Qgoe	48.278	-121.849
251	Qgoe	48.2778	-121.848
252	Qgoe	48.278	-121.848
253	Qgoe	48.2781	-121.848
254	Qgoe	48.2784	-121.848
255	Qgoe	48.2789	-121.848
256	Qgoe	48.2786	-121.848
257	Qgoe	48.2771	-121.845
258	Qgoe	48.2769	-121.846
259	Qgoe	48.2769	-121.846
260	Qgoe	48.2764	-121.846
261	Qgoe	48.2764	-121.846
262	Qgoe	48.2764	-121.846
263	Qgoe	48.2765	-121.846
264	Qgoe	48.2766	-121.846
265	Qgoe	48.2765	-121.846
266	Qgoe	48.2765	-121.846
267	Qgoe	48.2762	-121.846
268	Qgoe	48.2762	-121.846
269	Qgoe	48.2761	-121.846
270	Qgoe	48.2764	-121.847
271	Qgoe	48.2764	-121.847
272	Qgoe	48.2764	-121.847
273	Qgoe	48.2765	-121.847
274	Qgoe	48.2765	-121.846
275	Qgoe	48.2763	-121.847
276	Qgoe	48.2763	-121.846
277	Qgoe	48.2763	-121.846
278	Qgoe	48.2774	-121.844
279	Qgoe	48.2777	-121.843
280	Qgoe	48.2775	-121.843
281	Qgoe	48.2775	-121.842
282	Qgoe	48.2774	-121.842
283	Qgoe	48.2773	-121.842
284	Qgoe	48.2767	-121.845
285	Qgoe	48.2781	-121.844
286	Qgoe	48.278	-121.844
287	Qgoe	48.278	-121.844
288	Qgoe	48.2779	-121.847
289	Qgoe	48.278	-121.847
290	Qgoe	48.2781	-121.846
291	Qgoe	48.2832	-121.851
292	Qgoe	48.276	-121.845
293	Qgoe	48.2758	-121.845
294	Qgoe	48.2793	-121.848
295	Qgoe	48.2758	-121.848
1	Qgtv	48.2765	-121.849
2	Qgtv	48.2767	-121.849
3	Qgtv	48.2776	-121.847
4	Qgtv	48.2776	-121.847
5	Qgtv	48.2774	-121.846
6	Qgtv	48.2761	-121.845
7	Qgtv	48.2772	-121.845
8	Qgtv	48.2772	-121.845
9	Qgtv	48.2771	-121.844
10	Qgtv	48.2772	-121.844
11	Qgtv	48.2773	-121.843
12	Qgtv	48.2773	-121.843
13	Qgtv	48.2773	-121.843
14	Qgtv	48.2773	-121.843
15	Qgtv	48.2771	-121.842
16	Qgtv	48.2784	-121.847
17	Qgtv	48.2785	-121.847
18	Qgtv	48.279	-121.848
19	Qgtv	48.2781	-121.838
20	Qgtv	48.2781	-121.838
21	Qgtv	48.2781	-121.837
22	Qgtv	48.2782	-121.838
23	Qgtv	48.2778	-121.839
24	Qgtv	48.278	-121.84
25	Qgtv	48.2781	-121.839
26	Qgtv	48.2782	-121.839
27	Qgtv	48.2791	-121.839
28	Qgtv	48.2788	-121.839
29	Qgtv	48.2786	-121.839
30	Qgtv	48.2783	-121.839
31	Qgtv	48.2785	-121.838
32	Qgtv	48.2786	-121.838
33	Qgtv	48.2851	-121.85
34	Qgtv	48.285	-121.851
35	Qgtv	48.2847	-121.852
36	Qgtv	48.2843	-121.848
37	Qgtv	48.2844	-121.848
38	Qgtv	48.2839	-121.849
39	Qgtv	48.2843	-121.848
40	Qgtv	48.2842	-121.848
41	Qgtv	48.2842	-121.848
42	Qgtv	48.2842	-121.848
43	Qgtv	48.2836	-121.849
44	Qgtv	48.2838	-121.849
45	Qgtv	48.284	-121.848
46	Qgtv	48.2835	-121.849
47	Qgtv	48.2837	-121.848
48	Qgtv	48.2838	-121.848
49	Qgtv	48.2838	-121.848
50	Qgtv	48.284	-121.848
51	Qgtv	48.285	-121.847
52	Qgtv	48.2849	-121.847
53	Qgtv	48.2848	-121.847
54	Qgtv	48.2846	-121.848
55	Qgtv	48.2845	-121.848
56	Qgtv	48.2844	-121.848
57	Qgtv	48.2841	-121.847
58	Qgtv	48.2856	-121.848
59	Qgtv	48.2853	-121.846
60	Qgtv	48.2852	-121.847
61	Qgtv	48.2853	-121.847
62	Qgtv	48.2851	-121.847
63	Qgtv	48.2851	-121.847
64	Qgtv	48.2849	-121.847
65	Qgtv	48.2848	-121.847
66	Qgtv	48.2849	-121.847
67	Qgtv	48.2846	-121.847
68	Qgtv	48.2844	-121.847
69	Qgtv	48.2843	-121.847
70	Qgtv	48.2844	-121.846
71	Qgtv	48.2846	-121.846
72	Qgtv	48.2835	-121.846
73	Qgtv	48.2835	-121.846
74	Qgtv	48.2835	-121.845
75	Qgtv	48.2836	-121.845
76	Qgtv	48.2836	-121.845
77	Qgtv	48.2834	-121.845
78	Qgtv	48.2835	-121.846
79	Qgtv	48.2836	-121.846
80	Qgtv	48.2834	-121.847
81	Qgtv	48.2834	-121.847
82	Qgtv	48.2827	-121.849
83	Qgtv	48.2825	-121.849
84	Qgtv	48.2834	-121.848
85	Qgtv	48.2832	-121.849
86	Qgtv	48.2834	-121.849
87	Qgtv	48.2813	-121.849
88	Qgtv	48.2833	-121.845
89	Qgtv	48.2834	-121.845
90	Qgtv	48.2834	-121.845
91	Qgtv	48.2832	-121.845
92	Qgtv	48.2832	-121.845
93	Qgtv	48.2833	-121.845
94	Qgtv	48.2831	-121.845
95	Qgtv	48.2831	-121.845
96	Qgtv	48.2822	-121.846
97	Qgtv	48.2819	-121.846
98	Qgtv	48.2807	-121.846
99	Qgtv	48.2814	-121.844
100	Qgtv	48.2815	-121.844
101	Qgtv	48.2806	-121.845
102	Qgtv	48.2817	-121.843
103	Qgtv	48.2816	-121.843
104	Qgtv	48.2815	-121.843
105	Qgtv	48.2815	-121.843
106	Qgtv	48.2813	-121.843
107	Qgtv	48.2807	-121.844
108	Qgtv	48.2811	-121.842
109	Qgtv	48.2811	-121.842
110	Qgtv	48.2794	-121.847
111	Qgtv	48.2793	-121.847
112	Qgtv	48.2798	-121.846
113	Qgtv	48.2778	-121.844
114	Qgtv	48.2777	-121.844
115	Qgtv	48.2777	-121.843
116	Qgtv	48.2779	-121.844
117	Qgtv	48.2781	-121.843
118	Qgtv	48.2782	-121.845
119	Qgtv	48.2784	-121.845
120	Qgtv	48.2783	-121.845
121	Qgtv	48.2779	-121.845
122	Qgtv	48.2779	-121.845
123	Qgtv	48.2781	-121.846
124	Qgtv	48.2782	-121.846
125	Qgtv	48.2778	-121.845
126	Qgtv	48.2778	-121.845
127	Qgtv	48.2784	-121.847
128	Qgtv	48.2783	-121.847
129	Qgtv	48.2783	-121.846
130	Qgtv	48.2785	-121.846
131	Qgtv	48.2785	-121.847
132	Qgtv	48.278	-121.845
133	Qgtv	48.2793	-121.844
134	Qgtv	48.279	-121.841
135	Qgtv	48.2794	-121.841
136	Qgtv	48.2789	-121.841
137	Qgtv	48.2786	-121.841
138	Qgtv	48.2787	-121.842
139	Qgtv	48.2786	-121.842
140	Qgtv	48.2779	-121.841
141	Qgtv	48.278	-121.84
142	Qgtv	48.2781	-121.842
143	Qgtv	48.2781	-121.842
144	Qgtv	48.2778	-121.843
145	Qgtv	48.2777	-121.843
146	Qgtv	48.2778	-121.843
147	Qgtv	48.2777	-121.842
148	Qgtv	48.278	-121.844
149	Qgtv	48.278	-121.845
150	Qgtv	48.2779	-121.845
151	Qgtv	48.2804	-121.842
152	Qgtv	48.2804	-121.842
153	Qgtv	48.2805	-121.842
154	Qgtv	48.2806	-121.841
155	Qgtv	48.2803	-121.841
156	Qgtv	48.2802	-121.841
157	Qgtv	48.28	-121.841
158	Qgtv	48.2798	-121.841
159	Qgtv	48.2797	-121.841
160	Qgtv	48.2797	-121.841
161	Qgtv	48.2796	-121.841
162	Qgtv	48.28	-121.844
163	Qgtv	48.2799	-121.844
164	Qgtv	48.2799	-121.844
165	Qgtv	48.2799	-121.845
166	Qgtv	48.2796	-121.846
167	Qgtv	48.2797	-121.846
168	Qgtv	48.2789	-121.846
169	Qgtv	48.2846	-121.847
170	Qgtv	48.2846	-121.847
171	Qgtv	48.2842	-121.847
172	Qgtv	48.2842	-121.846
173	Qgtv	48.2842	-121.846
174	Qgtv	48.2843	-121.846
175	Qgtv	48.2843	-121.846
176	Qgtv	48.2844	-121.846
177	Qgtv	48.2843	-121.846
178	Qgtv	48.2843	-121.846
179	Qgtv	48.2843	-121.846
180	Qgtv	48.2842	-121.846
181	Qgtv	48.2842	-121.847
182	Qgtv	48.284	-121.846
183	Qgtv	48.2839	-121.847
184	Qgtv	48.284	-121.847
185	Qgtv	48.284	-121.847
186	Qgtv	48.284	-121.847
187	Qgtv	48.2841	-121.846
188	Qgtv	48.2836	-121.845
189	Qgtv	48.2835	-121.849
190	Qgtv	48.2837	-121.849
191	Qgtv	48.2837	-121.849
192	Qgtv	48.2838	-121.849
193	Qgtv	48.2839	-121.849
194	Qgtv	48.2839	-121.849
195	Qgtv	48.2841	-121.849
196	Qgtv	48.2841	-121.849
197	Qgtv	48.2837	-121.849
198	Qgtv	48.2838	-121.849
199	Qgtv	48.284	-121.848
200	Qgtv	48.2839	-121.848
201	Qgtv	48.284	-121.848
202	Qgtv	48.2841	-121.848
203	Qgtv	48.2842	-121.848
204	Qgtv	48.2842	-121.848
205	Qgtv	48.2843	-121.847
206	Qgtv	48.2843	-121.847
207	Qgtv	48.2845	-121.847
208	Qgtv	48.2844	-121.847
209	Qgtv	48.2835	-121.847
210	Qgtv	48.2835	-121.847
211	Qgtv	48.2843	-121.848
212	Qgtv	48.2844	-121.848
213	Qgtv	48.2845	-121.848
214	Qgtv	48.2845	-121.848
215	Qgtv	48.2847	-121.847
216	Qgtv	48.2847	-121.848
217	Qgtv	48.285	-121.847
218	Qgtv	48.2851	-121.847
219	Qgtv	48.2851	-121.847
220	Qgtv	48.2852	-121.847
221	Qgtv	48.2853	-121.847
222	Qgtv	48.2853	-121.847
223	Qgtv	48.2854	-121.847
224	Qgtv	48.2855	-121.847
225	Qgtv	48.2855	-121.847
226	Qgtv	48.2855	-121.848
227	Qgtv	48.2855	-121.847
228	Qgtv	48.2848	-121.847
229	Qgtv	48.2829	-121.85
230	Qgtv	48.2829	-121.85
231	Qgtv	48.2829	-121.85
232	Qgtv	48.282	-121.847
233	Qgtv	48.2809	-121.848
234	Qgtv	48.2809	-121.848
235	Qgtv	48.2823	-121.849
236	Qgtv	48.2824	-121.847
237	Qgtv	48.2834	-121.849
238	Qgtv	48.283	-121.849
239	Qgtv	48.2831	-121.849
240	Qgtv	48.283	-121.849
241	Qgtv	48.2832	-121.848
242	Qgtv	48.2832	-121.848
243	Qgtv	48.2833	-121.848
244	Qgtv	48.2833	-121.848
245	Qgtv	48.2834	-121.848
246	Qgtv	48.2833	-121.848
247	Qgtv	48.2833	-121.848
248	Qgtv	48.2834	-121.847
249	Qgtv	48.2834	-121.847
250	Qgtv	48.2832	-121.847
251	Qgtv	48.2833	-121.847
252	Qgtv	48.2832	-121.847
253	Qgtv	48.283	-121.848
254	Qgtv	48.2834	-121.849
255	Qgtv	48.2832	-121.847
256	Qgtv	48.2833	-121.847
257	Qgtv	48.2833	-121.847
258	Qgtv	48.2833	-121.847
259	Qgtv	48.2834	-121.847
260	Qgtv	48.2834	-121.847
261	Qgtv	48.2831	-121.847
262	Qgtv	48.283	-121.846
263	Qgtv	48.2829	-121.846
264	Qgtv	48.2829	-121.846
265	Qgtv	48.283	-121.846
266	Qgtv	48.2831	-121.846
267	Qgtv	48.2832	-121.846
268	Qgtv	48.2832	-121.846
269	Qgtv	48.2833	-121.846
270	Qgtv	48.2833	-121.846
271	Qgtv	48.2834	-121.846
272	Qgtv	48.2833	-121.846
273	Qgtv	48.2833	-121.846
274	Qgtv	48.2833	-121.846
275	Qgtv	48.2834	-121.846
276	Qgtv	48.2832	-121.846
277	Qgtv	48.2831	-121.846
278	Qgtv	48.2829	-121.846
279	Qgtv	48.2829	-121.846
280	Qgtv	48.2829	-121.846
281	Qgtv	48.2827	-121.846
282	Qgtv	48.2826	-121.846
283	Qgtv	48.2826	-121.846
284	Qgtv	48.2826	-121.846
285	Qgtv	48.2825	-121.846
286	Qgtv	48.2826	-121.846
287	Qgtv	48.2822	-121.847
288	Qgtv	48.2825	-121.846
289	Qgtv	48.2825	-121.846
290	Qgtv	48.2831	-121.845
291	Qgtv	48.2831	-121.845
292	Qgtv	48.2832	-121.845
293	Qgtv	48.2823	-121.845
294	Qgtv	48.2819	-121.845
295	Qgtv	48.2819	-121.845
296	Qgtv	48.2819	-121.845
297	Qgtv	48.2823	-121.845
298	Qgtv	48.2818	-121.846
299	Qgtv	48.282	-121.846
300	Qgtv	48.282	-121.846
301	Qgtv	48.2823	-121.846
302	Qgtv	48.2818	-121.846
303	Qgtv	48.2814	-121.846
304	Qgtv	48.2814	-121.846
305	Qgtv	48.2813	-121.846
306	Qgtv	48.2813	-121.846
307	Qgtv	48.2812	-121.846
308	Qgtv	48.2812	-121.846
309	Qgtv	48.2817	-121.844
310	Qgtv	48.2817	-121.844
311	Qgtv	48.281	-121.843
312	Qgtv	48.2814	-121.843
313	Qgtv	48.2818	-121.844
314	Qgtv	48.282	-121.844
315	Qgtv	48.2819	-121.844
316	Qgtv	48.282	-121.844
317	Qgtv	48.2819	-121.844
318	Qgtv	48.2822	-121.843
319	Qgtv	48.2822	-121.843
320	Qgtv	48.2823	-121.844
321	Qgtv	48.283	-121.844
322	Qgtv	48.2829	-121.844
323	Qgtv	48.283	-121.844
324	Qgtv	48.2828	-121.844
325	Qgtv	48.2827	-121.844
326	Qgtv	48.2827	-121.844
327	Qgtv	48.2827	-121.844
328	Qgtv	48.2827	-121.843
329	Qgtv	48.2826	-121.843
330	Qgtv	48.2825	-121.844
331	Qgtv	48.2825	-121.844
332	Qgtv	48.2825	-121.844
333	Qgtv	48.2822	-121.844
334	Qgtv	48.2822	-121.844
335	Qgtv	48.2823	-121.844
336	Qgtv	48.2765	-121.848
337	Qgtv	48.2766	-121.848
338	Qgtv	48.2767	-121.848
339	Qgtv	48.2766	-121.848
340	Qgtv	48.2767	-121.848
341	Qgtv	48.2767	-121.848
342	Qgtv	48.2771	-121.848
343	Qgtv	48.2769	-121.848
344	Qgtv	48.277	-121.848
345	Qgtv	48.2768	-121.848
346	Qgtv	48.2772	-121.848
347	Qgtv	48.2772	-121.849
348	Qgtv	48.2771	-121.849
349	Qgtv	48.2776	-121.849
350	Qgtv	48.2777	-121.849
351	Qgtv	48.2778	-121.849
352	Qgtv	48.2778	-121.848
353	Qgtv	48.278	-121.848
354	Qgtv	48.2779	-121.848
355	Qgtv	48.2785	-121.847
356	Qgtv	48.2782	-121.849
357	Qgtv	48.278	-121.849
358	Qgtv	48.2773	-121.846
359	Qgtv	48.2774	-121.846
360	Qgtv	48.2773	-121.846
361	Qgtv	48.2771	-121.845
362	Qgtv	48.277	-121.846
363	Qgtv	48.2775	-121.845
364	Qgtv	48.2775	-121.845
365	Qgtv	48.2774	-121.844
366	Qgtv	48.2774	-121.844
367	Qgtv	48.2774	-121.844
368	Qgtv	48.2773	-121.844
369	Qgtv	48.2774	-121.844
370	Qgtv	48.2774	-121.844
371	Qgtv	48.2775	-121.843
372	Qgtv	48.2775	-121.843
373	Qgtv	48.2777	-121.844
374	Qgtv	48.2777	-121.843
375	Qgtv	48.2776	-121.843
376	Qgtv	48.2776	-121.843
377	Qgtv	48.2777	-121.843
378	Qgtv	48.2774	-121.843
379	Qgtv	48.277	-121.844
380	Qgtv	48.2774	-121.843
381	Qgtv	48.2772	-121.843
382	Qgtv	48.2774	-121.843
383	Qgtv	48.2774	-121.843
384	Qgtv	48.2775	-121.843
385	Qgtv	48.2775	-121.843
386	Qgtv	48.2775	-121.843
387	Qgtv	48.2775	-121.843
388	Qgtv	48.2775	-121.842
389	Qgtv	48.277	-121.843
390	Qgtv	48.277	-121.843
391	Qgtv	48.277	-121.843
392	Qgtv	48.277	-121.844
393	Qgtv	48.2769	-121.844
394	Qgtv	48.2765	-121.845
395	Qgtv	48.2768	-121.845
396	Qgtv	48.2783	-121.846
397	Qgtv	48.2777	-121.847
398	Qgtv	48.2778	-121.846
399	Qgtv	48.2777	-121.846
400	Qgtv	48.2779	-121.846
401	Qgtv	48.2836	-121.846
402	Qgtv	48.2835	-121.846
403	Qgtv	48.2835	-121.846
404	Qgtv	48.2835	-121.846
405	Qgtv	48.2837	-121.849
406	Qgtv	48.2838	-121.849
407	Qgtv	48.284	-121.849
408	Qgtv	48.2757	-121.846
409	Qgtv	48.2756	-121.846
410	Qgtv	48.2756	-121.847
411	Qgtv	48.2756	-121.846
412	Qgtv	48.2758	-121.846
413	Qgtv	48.2757	-121.846
414	Qgtv	48.281	-121.847
415	Qgtv	48.2829	-121.847
416	Qgtv	48.2828	-121.846
417	Qgtv	48.2829	-121.846
418	Qgtv	48.2842	-121.846
419	Qgtv	48.2835	-121.848
420	Qgtv	48.283	-121.85
421	Qgtv	48.286	-121.852
422	Qgtv	48.2865	-121.852
423	Qgtv	48.2837	-121.85
424	Qgtv	48.2794	-121.848
425	Qgtv	48.2759	-121.848
1	Qgov	48.2772	-121.848
2	Qgov	48.2773	-121.847
3	Qgov	48.277	-121.847
4	Qgov	48.276	-121.846
5	Qgov	48.2804	-121.848
6	Qgov	48.2804	-121.848
7	Qgov	48.2782	-121.838
8	Qgov	48.2781	-121.837
9	Qgov	48.2786	-121.838
10	Qgov	48.2848	-121.847
11	Qgov	48.2856	-121.847
12	Qgov	48.2834	-121.847
13	Qgov	48.2836	-121.847
14	Qgov	48.2837	-121.846
15	Qgov	48.2823	-121.849
16	Qgov	48.2822	-121.849
17	Qgov	48.2822	-121.849
18	Qgov	48.2829	-121.848
19	Qgov	48.2818	-121.849
20	Qgov	48.281	-121.848
21	Qgov	48.2811	-121.849
22	Qgov	48.281	-121.849
23	Qgov	48.2809	-121.849
24	Qgov	48.283	-121.845
25	Qgov	48.2832	-121.845
26	Qgov	48.2832	-121.845
27	Qgov	48.2811	-121.846
28	Qgov	48.2811	-121.845
29	Qgov	48.2811	-121.845
30	Qgov	48.2812	-121.845
31	Qgov	48.2812	-121.845
32	Qgov	48.2811	-121.845
33	Qgov	48.2811	-121.845
34	Qgov	48.2811	-121.845
35	Qgov	48.2815	-121.844
36	Qgov	48.2814	-121.844
37	Qgov	48.282	-121.843
38	Qgov	48.2819	-121.843
39	Qgov	48.2819	-121.843
40	Qgov	48.2817	-121.843
41	Qgov	48.2817	-121.843
42	Qgov	48.2814	-121.843
43	Qgov	48.281	-121.842
44	Qgov	48.2797	-121.847
45	Qgov	48.2799	-121.846
46	Qgov	48.2795	-121.846
47	Qgov	48.2793	-121.846
48	Qgov	48.2793	-121.846
49	Qgov	48.2792	-121.846
50	Qgov	48.2794	-121.846
51	Qgov	48.2793	-121.846
52	Qgov	48.2783	-121.846
53	Qgov	48.2782	-121.842
54	Qgov	48.2838	-121.846
55	Qgov	48.2838	-121.846
56	Qgov	48.2838	-121.847
57	Qgov	48.2838	-121.847
58	Qgov	48.2837	-121.847
59	Qgov	48.2837	-121.847
60	Qgov	48.2836	-121.847
61	Qgov	48.2835	-121.847
62	Qgov	48.2835	-121.847
63	Qgov	48.2841	-121.847
64	Qgov	48.2841	-121.847
65	Qgov	48.284	-121.847
66	Qgov	48.2848	-121.847
67	Qgov	48.2845	-121.847
68	Qgov	48.2845	-121.847
69	Qgov	48.2843	-121.847
70	Qgov	48.2843	-121.847
71	Qgov	48.2843	-121.848
72	Qgov	48.2843	-121.848
73	Qgov	48.2842	-121.849
74	Qgov	48.2837	-121.849
75	Qgov	48.2837	-121.849
76	Qgov	48.2835	-121.848
77	Qgov	48.2836	-121.848
78	Qgov	48.2834	-121.847
79	Qgov	48.2836	-121.847
80	Qgov	48.2837	-121.847
81	Qgov	48.2829	-121.85
82	Qgov	48.2812	-121.848
83	Qgov	48.2809	-121.848
84	Qgov	48.2817	-121.848
85	Qgov	48.2819	-121.847
86	Qgov	48.2815	-121.848
87	Qgov	48.2824	-121.847
88	Qgov	48.2821	-121.849
89	Qgov	48.2822	-121.849
90	Qgov	48.2831	-121.848
91	Qgov	48.2829	-121.848
92	Qgov	48.2831	-121.847
93	Qgov	48.2832	-121.848
94	Qgov	48.2832	-121.848
95	Qgov	48.2832	-121.848
96	Qgov	48.2831	-121.848
97	Qgov	48.2831	-121.848
98	Qgov	48.2832	-121.849
99	Qgov	48.2833	-121.848
100	Qgov	48.2832	-121.848
101	Qgov	48.2831	-121.849
102	Qgov	48.2831	-121.849
103	Qgov	48.283	-121.849
104	Qgov	48.2829	-121.849
105	Qgov	48.2829	-121.849
106	Qgov	48.2831	-121.845
107	Qgov	48.283	-121.846
108	Qgov	48.2827	-121.846
109	Qgov	48.2827	-121.846
110	Qgov	48.2826	-121.846
111	Qgov	48.2826	-121.846
112	Qgov	48.2831	-121.845
113	Qgov	48.283	-121.845
114	Qgov	48.283	-121.845
115	Qgov	48.283	-121.845
116	Qgov	48.2828	-121.845
117	Qgov	48.2827	-121.845
118	Qgov	48.2827	-121.845
119	Qgov	48.2826	-121.845
120	Qgov	48.2826	-121.845
121	Qgov	48.2826	-121.845
122	Qgov	48.2828	-121.845
123	Qgov	48.283	-121.845
124	Qgov	48.283	-121.845
125	Qgov	48.2823	-121.845
126	Qgov	48.2822	-121.845
127	Qgov	48.2823	-121.845
128	Qgov	48.2823	-121.845
129	Qgov	48.2824	-121.846
130	Qgov	48.2823	-121.846
131	Qgov	48.282	-121.847
132	Qgov	48.282	-121.846
133	Qgov	48.2821	-121.846
134	Qgov	48.2822	-121.847
135	Qgov	48.2822	-121.847
136	Qgov	48.2823	-121.847
137	Qgov	48.2823	-121.846
138	Qgov	48.2824	-121.846
139	Qgov	48.2825	-121.847
140	Qgov	48.2826	-121.846
141	Qgov	48.2826	-121.846
142	Qgov	48.2825	-121.846
143	Qgov	48.2825	-121.846
144	Qgov	48.2823	-121.846
145	Qgov	48.2818	-121.846
146	Qgov	48.2818	-121.845
147	Qgov	48.2813	-121.846
148	Qgov	48.2816	-121.845
149	Qgov	48.2811	-121.847
150	Qgov	48.2813	-121.845
151	Qgov	48.2814	-121.844
152	Qgov	48.2815	-121.844
153	Qgov	48.2811	-121.844
154	Qgov	48.2811	-121.844
155	Qgov	48.2811	-121.844
156	Qgov	48.2811	-121.844
157	Qgov	48.2811	-121.844
158	Qgov	48.2811	-121.844
159	Qgov	48.2812	-121.844
160	Qgov	48.281	-121.843
161	Qgov	48.2816	-121.844
162	Qgov	48.2811	-121.843
163	Qgov	48.2812	-121.843
164	Qgov	48.2811	-121.843
165	Qgov	48.2812	-121.843
166	Qgov	48.2814	-121.842
167	Qgov	48.2813	-121.843
168	Qgov	48.2813	-121.843
169	Qgov	48.2814	-121.843
170	Qgov	48.2814	-121.843
171	Qgov	48.2816	-121.842
172	Qgov	48.2816	-121.842
173	Qgov	48.2817	-121.842
174	Qgov	48.2817	-121.843
175	Qgov	48.2818	-121.844
176	Qgov	48.2817	-121.844
177	Qgov	48.2818	-121.844
178	Qgov	48.282	-121.844
179	Qgov	48.2823	-121.843
180	Qgov	48.2823	-121.843
181	Qgov	48.283	-121.844
182	Qgov	48.2829	-121.844
183	Qgov	48.2826	-121.844
184	Qgov	48.2826	-121.843
185	Qgov	48.2826	-121.843
186	Qgov	48.2825	-121.844
187	Qgov	48.2824	-121.844
188	Qgov	48.2825	-121.844
189	Qgov	48.2824	-121.844
190	Qgov	48.282	-121.844
191	Qgov	48.282	-121.844
192	Qgov	48.2821	-121.844
193	Qgov	48.2822	-121.844
194	Qgov	48.2823	-121.844
195	Qgov	48.2821	-121.844
196	Qgov	48.2832	-121.847
197	Qgov	48.2774	-121.849
198	Qgov	48.2773	-121.849
199	Qgov	48.2773	-121.849
200	Qgov	48.2773	-121.849
201	Qgov	48.2771	-121.849
202	Qgov	48.2765	-121.848
203	Qgov	48.2765	-121.848
204	Qgov	48.2765	-121.847
205	Qgov	48.277	-121.847
206	Qgov	48.2772	-121.847
207	Qgov	48.2769	-121.847
208	Qgov	48.2763	-121.848
209	Qgov	48.278	-121.849
210	Qgov	48.2781	-121.849
211	Qgov	48.278	-121.849
212	Qgov	48.2777	-121.849
213	Qgov	48.2778	-121.849
214	Qgov	48.2782	-121.847
215	Qgov	48.2771	-121.847
216	Qgov	48.2769	-121.847
217	Qgov	48.277	-121.847
218	Qgov	48.2772	-121.846
219	Qgov	48.2772	-121.846
220	Qgov	48.2772	-121.846
221	Qgov	48.2771	-121.846
222	Qgov	48.2772	-121.846
223	Qgov	48.2772	-121.846
224	Qgov	48.2771	-121.845
225	Qgov	48.2771	-121.846
226	Qgov	48.277	-121.846
227	Qgov	48.2762	-121.846
228	Qgov	48.2763	-121.846
229	Qgov	48.2763	-121.847
230	Qgov	48.2763	-121.847
231	Qgov	48.2772	-121.844
232	Qgov	48.2772	-121.844
233	Qgov	48.2773	-121.843
234	Qgov	48.2772	-121.843
235	Qgov	48.2775	-121.843
236	Qgov	48.2775	-121.842
237	Qgov	48.2771	-121.844
238	Qgov	48.2766	-121.845
239	Qgov	48.2768	-121.845
240	Qgov	48.2782	-121.842
241	Qgov	48.2782	-121.847
242	Qgov	48.278	-121.847
243	Qgov	48.278	-121.847
244	Qgov	48.2781	-121.847
245	Qgov	48.2781	-121.846
246	Qgov	48.2777	-121.847
247	Qgov	48.2778	-121.847
248	Qgov	48.2777	-121.847
249	Qgov	48.2777	-121.847
250	Qgov	48.2779	-121.846
251	Qgov	48.2779	-121.846
252	Qgov	48.278	-121.846
253	Qgov	48.2781	-121.846
254	Qgov	48.2777	-121.846
255	Qgov	48.2777	-121.846
256	Qgov	48.2778	-121.846
257	Qgov	48.2779	-121.847
258	Qgov	48.278	-121.846
259	Qgov	48.2813	-121.844
260	Qgov	48.2815	-121.842
261	Qgov	48.2809	-121.848
262	Qgov	48.2809	-121.848
263	Qgov	48.281	-121.848
264	Qgov	48.2831	-121.849
265	Qgov	48.2764	-121.843
266	Qgov	48.2765	-121.843
267	Qgov	48.2757	-121.846
268	Qgov	48.2758	-121.846
269	Qgov	48.2754	-121.846
270	Qgov	48.2753	-121.846
271	Qgov	48.281	-121.847
272	Qgov	48.2807	-121.848
273	Qgov	48.2831	-121.846
274	Qgov	48.2778	-121.849
275	Qgov	48.2855	-121.846
276	Qgov	48.2772	-121.848
1	Qglv	48.2766	-121.849
2	Qglv	48.2766	-121.849
3	Qglv	48.2766	-121.849
4	Qglv	48.2762	-121.849
5	Qglv	48.276	-121.849
6	Qglv	48.2759	-121.848
7	Qglv	48.2775	-121.848
8	Qglv	48.276	-121.846
9	Qglv	48.2761	-121.846
10	Qglv	48.2762	-121.846
11	Qglv	48.2762	-121.845
12	Qglv	48.276	-121.846
13	Qglv	48.2766	-121.846
14	Qglv	48.2767	-121.847
15	Qglv	48.277	-121.845
16	Qglv	48.2772	-121.845
17	Qglv	48.2771	-121.844
18	Qglv	48.2786	-121.831
19	Qglv	48.2796	-121.848
20	Qglv	48.2791	-121.848
21	Qglv	48.2802	-121.848
22	Qglv	48.2801	-121.847
23	Qglv	48.2805	-121.848
24	Qglv	48.2797	-121.839
25	Qglv	48.2796	-121.839
26	Qglv	48.2794	-121.839
27	Qglv	48.2793	-121.834
28	Qglv	48.2792	-121.834
29	Qglv	48.2791	-121.834
30	Qglv	48.2789	-121.835
31	Qglv	48.2789	-121.836
32	Qglv	48.2783	-121.838
33	Qglv	48.2784	-121.838
34	Qglv	48.2782	-121.839
35	Qglv	48.278	-121.84
36	Qglv	48.2782	-121.84
37	Qglv	48.2786	-121.84
38	Qglv	48.2787	-121.84
39	Qglv	48.2792	-121.839
40	Qglv	48.2788	-121.839
41	Qglv	48.2787	-121.838
42	Qglv	48.2786	-121.839
43	Qglv	48.2836	-121.849
44	Qglv	48.2836	-121.848
45	Qglv	48.2837	-121.848
46	Qglv	48.2838	-121.848
47	Qglv	48.284	-121.848
48	Qglv	48.284	-121.848
49	Qglv	48.2858	-121.848
50	Qglv	48.2859	-121.848
51	Qglv	48.2839	-121.845
52	Qglv	48.2839	-121.845
53	Qglv	48.284	-121.846
54	Qglv	48.2842	-121.845
55	Qglv	48.2837	-121.847
56	Qglv	48.2836	-121.847
57	Qglv	48.2844	-121.846
58	Qglv	48.2848	-121.846
59	Qglv	48.2846	-121.846
60	Qglv	48.2847	-121.846
61	Qglv	48.285	-121.846
62	Qglv	48.2833	-121.849
63	Qglv	48.2834	-121.849
64	Qglv	48.2833	-121.849
65	Qglv	48.2806	-121.847
66	Qglv	48.2805	-121.847
67	Qglv	48.2822	-121.846
68	Qglv	48.2819	-121.846
69	Qglv	48.2811	-121.847
70	Qglv	48.2807	-121.847
71	Qglv	48.2806	-121.846
72	Qglv	48.2806	-121.846
73	Qglv	48.2808	-121.846
74	Qglv	48.2809	-121.846
75	Qglv	48.2809	-121.846
76	Qglv	48.2807	-121.846
77	Qglv	48.2807	-121.846
78	Qglv	48.2807	-121.845
79	Qglv	48.2806	-121.845
80	Qglv	48.2807	-121.845
81	Qglv	48.2806	-121.845
82	Qglv	48.2807	-121.844
83	Qglv	48.281	-121.845
84	Qglv	48.281	-121.845
85	Qglv	48.281	-121.845
86	Qglv	48.2813	-121.845
87	Qglv	48.2812	-121.845
88	Qglv	48.2812	-121.845
89	Qglv	48.2813	-121.845
90	Qglv	48.2811	-121.845
91	Qglv	48.2812	-121.845
92	Qglv	48.2813	-121.845
93	Qglv	48.2806	-121.844
94	Qglv	48.2807	-121.844
95	Qglv	48.2809	-121.842
96	Qglv	48.281	-121.842
97	Qglv	48.2809	-121.842
98	Qglv	48.2815	-121.844
99	Qglv	48.2815	-121.844
100	Qglv	48.2813	-121.843
101	Qglv	48.283	-121.843
102	Qglv	48.2814	-121.843
103	Qglv	48.2804	-121.846
104	Qglv	48.2801	-121.846
105	Qglv	48.2797	-121.847
106	Qglv	48.28	-121.846
107	Qglv	48.2793	-121.847
108	Qglv	48.2795	-121.847
109	Qglv	48.2787	-121.844
110	Qglv	48.2781	-121.846
111	Qglv	48.2782	-121.846
112	Qglv	48.2783	-121.846
113	Qglv	48.2779	-121.845
114	Qglv	48.2795	-121.841
115	Qglv	48.2797	-121.841
116	Qglv	48.2797	-121.841
117	Qglv	48.2798	-121.842
118	Qglv	48.2798	-121.842
119	Qglv	48.2799	-121.842
120	Qglv	48.28	-121.843
121	Qglv	48.28	-121.843
122	Qglv	48.2804	-121.841
123	Qglv	48.2801	-121.844
124	Qglv	48.2801	-121.844
125	Qglv	48.2801	-121.844
126	Qglv	48.28	-121.844
127	Qglv	48.2798	-121.845
128	Qglv	48.2799	-121.845
129	Qglv	48.2798	-121.845
130	Qglv	48.2798	-121.845
131	Qglv	48.2797	-121.846
132	Qglv	48.2795	-121.846
133	Qglv	48.2801	-121.844
134	Qglv	48.2793	-121.846
135	Qglv	48.2793	-121.847
136	Qglv	48.2836	-121.844
137	Qglv	48.2835	-121.844
138	Qglv	48.2837	-121.844
139	Qglv	48.2842	-121.845
140	Qglv	48.2837	-121.845
141	Qglv	48.2836	-121.845
142	Qglv	48.2842	-121.845
143	Qglv	48.2842	-121.846
144	Qglv	48.2844	-121.846
145	Qglv	48.2838	-121.847
146	Qglv	48.2837	-121.847
147	Qglv	48.2837	-121.847
148	Qglv	48.2838	-121.847
149	Qglv	48.2837	-121.846
150	Qglv	48.2837	-121.846
151	Qglv	48.2837	-121.846
152	Qglv	48.2837	-121.849
153	Qglv	48.2838	-121.849
154	Qglv	48.2838	-121.848
155	Qglv	48.2839	-121.848
156	Qglv	48.284	-121.848
157	Qglv	48.2841	-121.848
158	Qglv	48.2841	-121.848
159	Qglv	48.2842	-121.847
160	Qglv	48.2842	-121.847
161	Qglv	48.2843	-121.847
162	Qglv	48.2845	-121.848
163	Qglv	48.2835	-121.849
164	Qglv	48.2829	-121.85
165	Qglv	48.2828	-121.85
166	Qglv	48.2812	-121.848
167	Qglv	48.2811	-121.848
168	Qglv	48.2811	-121.848
169	Qglv	48.281	-121.848
170	Qglv	48.2809	-121.848
171	Qglv	48.2813	-121.848
172	Qglv	48.2814	-121.848
173	Qglv	48.2824	-121.849
174	Qglv	48.2825	-121.848
175	Qglv	48.2826	-121.848
176	Qglv	48.2827	-121.848
177	Qglv	48.283	-121.848
178	Qglv	48.2823	-121.849
179	Qglv	48.2832	-121.847
180	Qglv	48.283	-121.848
181	Qglv	48.283	-121.848
182	Qglv	48.2829	-121.849
183	Qglv	48.2829	-121.849
184	Qglv	48.283	-121.849
185	Qglv	48.2831	-121.849
186	Qglv	48.2831	-121.849
187	Qglv	48.2827	-121.846
188	Qglv	48.2826	-121.846
189	Qglv	48.2827	-121.845
190	Qglv	48.2827	-121.845
191	Qglv	48.2828	-121.845
192	Qglv	48.2828	-121.845
193	Qglv	48.2829	-121.845
194	Qglv	48.2829	-121.845
195	Qglv	48.2825	-121.845
196	Qglv	48.2825	-121.845
197	Qglv	48.2825	-121.845
198	Qglv	48.2825	-121.845
199	Qglv	48.2825	-121.845
200	Qglv	48.2825	-121.845
201	Qglv	48.2824	-121.845
202	Qglv	48.2824	-121.845
203	Qglv	48.2823	-121.845
204	Qglv	48.2823	-121.845
205	Qglv	48.2821	-121.845
206	Qglv	48.2822	-121.845
207	Qglv	48.2821	-121.845
208	Qglv	48.2822	-121.845
209	Qglv	48.282	-121.845
210	Qglv	48.2821	-121.845
211	Qglv	48.2821	-121.845
212	Qglv	48.282	-121.845
213	Qglv	48.282	-121.845
214	Qglv	48.2819	-121.845
215	Qglv	48.2818	-121.845
216	Qglv	48.2821	-121.845
217	Qglv	48.282	-121.845
218	Qglv	48.2819	-121.845
219	Qglv	48.2823	-121.845
220	Qglv	48.2823	-121.845
221	Qglv	48.2825	-121.845
222	Qglv	48.2822	-121.846
223	Qglv	48.2821	-121.846
224	Qglv	48.2819	-121.846
225	Qglv	48.2819	-121.846
226	Qglv	48.2819	-121.846
227	Qglv	48.2819	-121.846
228	Qglv	48.2824	-121.846
229	Qglv	48.2824	-121.847
230	Qglv	48.2824	-121.847
231	Qglv	48.2825	-121.846
232	Qglv	48.2824	-121.846
233	Qglv	48.2824	-121.846
234	Qglv	48.2824	-121.846
235	Qglv	48.2822	-121.847
236	Qglv	48.2819	-121.847
237	Qglv	48.2821	-121.846
238	Qglv	48.2821	-121.846
239	Qglv	48.2822	-121.847
240	Qglv	48.2825	-121.846
241	Qglv	48.2825	-121.846
242	Qglv	48.2825	-121.846
243	Qglv	48.2826	-121.846
244	Qglv	48.2823	-121.846
245	Qglv	48.2815	-121.846
246	Qglv	48.2815	-121.845
247	Qglv	48.2815	-121.845
248	Qglv	48.2814	-121.845
249	Qglv	48.2815	-121.845
250	Qglv	48.2816	-121.845
251	Qglv	48.2817	-121.845
252	Qglv	48.2817	-121.845
253	Qglv	48.2818	-121.845
254	Qglv	48.2814	-121.846
255	Qglv	48.2812	-121.846
256	Qglv	48.2811	-121.846
257	Qglv	48.2811	-121.846
258	Qglv	48.2811	-121.847
259	Qglv	48.2811	-121.847
260	Qglv	48.2811	-121.847
261	Qglv	48.2812	-121.847
262	Qglv	48.2811	-121.847
263	Qglv	48.2812	-121.844
264	Qglv	48.2811	-121.844
265	Qglv	48.2811	-121.844
266	Qglv	48.2811	-121.844
267	Qglv	48.281	-121.844
268	Qglv	48.2813	-121.844
269	Qglv	48.2813	-121.844
270	Qglv	48.2812	-121.844
271	Qglv	48.2815	-121.844
272	Qglv	48.281	-121.843
273	Qglv	48.2811	-121.843
274	Qglv	48.2809	-121.842
275	Qglv	48.2813	-121.842
276	Qglv	48.2813	-121.842
277	Qglv	48.2813	-121.842
278	Qglv	48.2812	-121.842
279	Qglv	48.2812	-121.842
280	Qglv	48.2814	-121.842
281	Qglv	48.2813	-121.843
282	Qglv	48.2816	-121.842
283	Qglv	48.2816	-121.842
284	Qglv	48.2818	-121.844
285	Qglv	48.2828	-121.843
286	Qglv	48.2829	-121.843
287	Qglv	48.2829	-121.843
288	Qglv	48.2831	-121.844
289	Qglv	48.2831	-121.844
290	Qglv	48.2763	-121.848
291	Qglv	48.2781	-121.849
292	Qglv	48.2771	-121.846
293	Qglv	48.2772	-121.846
294	Qglv	48.2771	-121.846
295	Qglv	48.2771	-121.846
296	Qglv	48.2776	-121.846
297	Qglv	48.2776	-121.846
298	Qglv	48.2776	-121.846
299	Qglv	48.2776	-121.846
300	Qglv	48.2775	-121.846
301	Qglv	48.2773	-121.846
302	Qglv	48.2772	-121.846
303	Qglv	48.2772	-121.846
304	Qglv	48.2771	-121.846
305	Qglv	48.2772	-121.846
306	Qglv	48.2771	-121.846
307	Qglv	48.2771	-121.845
308	Qglv	48.2774	-121.845
309	Qglv	48.2771	-121.845
310	Qglv	48.277	-121.845
311	Qglv	48.277	-121.845
312	Qglv	48.2769	-121.845
313	Qglv	48.2767	-121.845
314	Qglv	48.2767	-121.845
315	Qglv	48.2768	-121.845
316	Qglv	48.2769	-121.845
317	Qglv	48.277	-121.845
318	Qglv	48.2771	-121.845
319	Qglv	48.277	-121.846
320	Qglv	48.2768	-121.846
321	Qglv	48.2767	-121.846
322	Qglv	48.2767	-121.846
323	Qglv	48.2766	-121.846
324	Qglv	48.2766	-121.846
325	Qglv	48.2765	-121.846
326	Qglv	48.2765	-121.846
327	Qglv	48.2764	-121.846
328	Qglv	48.2765	-121.846
329	Qglv	48.2764	-121.846
330	Qglv	48.2763	-121.846
331	Qglv	48.2761	-121.846
332	Qglv	48.2762	-121.846
333	Qglv	48.2762	-121.846
334	Qglv	48.2763	-121.845
335	Qglv	48.2763	-121.845
336	Qglv	48.276	-121.846
337	Qglv	48.2762	-121.846
338	Qglv	48.2763	-121.846
339	Qglv	48.2771	-121.844
340	Qglv	48.2771	-121.844
341	Qglv	48.2771	-121.844
342	Qglv	48.2771	-121.844
343	Qglv	48.2769	-121.844
344	Qglv	48.2768	-121.844
345	Qglv	48.2767	-121.844
346	Qglv	48.277	-121.844
347	Qglv	48.2771	-121.844
348	Qglv	48.277	-121.844
349	Qglv	48.2771	-121.845
350	Qglv	48.277	-121.844
351	Qglv	48.2769	-121.844
352	Qglv	48.2768	-121.844
353	Qglv	48.2769	-121.845
354	Qglv	48.2767	-121.845
355	Qglv	48.2767	-121.845
356	Qglv	48.2766	-121.845
357	Qglv	48.2766	-121.844
358	Qglv	48.2765	-121.844
359	Qglv	48.2766	-121.844
360	Qglv	48.2765	-121.844
361	Qglv	48.2764	-121.844
362	Qglv	48.2764	-121.845
363	Qglv	48.2763	-121.845
364	Qglv	48.2764	-121.845
365	Qglv	48.2764	-121.845
366	Qglv	48.2766	-121.845
367	Qglv	48.2767	-121.845
368	Qglv	48.2768	-121.845
369	Qglv	48.2769	-121.845
370	Qglv	48.2769	-121.845
371	Qglv	48.2769	-121.845
372	Qglv	48.277	-121.845
373	Qglv	48.277	-121.845
374	Qglv	48.277	-121.845
375	Qglv	48.277	-121.845
376	Qglv	48.277	-121.845
377	Qglv	48.277	-121.845
378	Qglv	48.2781	-121.847
379	Qglv	48.2779	-121.846
380	Qglv	48.2779	-121.846
381	Qglv	48.278	-121.846
382	Qglv	48.278	-121.846
383	Qglv	48.278	-121.846
384	Qglv	48.2778	-121.846
385	Qglv	48.2777	-121.846
386	Qglv	48.2836	-121.845
387	Qglv	48.2806	-121.846
388	Qglv	48.2813	-121.844
389	Qglv	48.283	-121.843
390	Qglv	48.281	-121.841
391	Qglv	48.281	-121.841
392	Qglv	48.2809	-121.841
393	Qglv	48.281	-121.84
394	Qglv	48.2809	-121.848
395	Qglv	48.2809	-121.848
396	Qglv	48.2809	-121.848
397	Qglv	48.281	-121.848
398	Qglv	48.2766	-121.843
399	Qglv	48.2764	-121.844
400	Qglv	48.2763	-121.844
401	Qglv	48.2761	-121.845
402	Qglv	48.2761	-121.845
403	Qglv	48.2755	-121.847
404	Qglv	48.2754	-121.847
405	Qglv	48.2753	-121.847
406	Qglv	48.275	-121.848
407	Qglv	48.2748	-121.848
408	Qglv	48.2748	-121.848
409	Qglv	48.2757	-121.845
410	Qglv	48.2757	-121.845
411	Qglv	48.2754	-121.846
412	Qglv	48.2753	-121.847
413	Qglv	48.2829	-121.847
414	Qglv	48.2827	-121.849
415	Qglv	48.2771	-121.849
1	Qgund	48.2774	-121.847
2	Qgund	48.276	-121.847
3	Qgund	48.2764	-121.844
4	Qgund	48.2762	-121.844
5	Qgund	48.2763	-121.844
6	Qgund	48.2762	-121.845
7	Qgund	48.2765	-121.844
8	Qgund	48.2756	-121.846
9	Qgund	48.2756	-121.846
10	Qgund	48.2755	-121.845
11	Qgund	48.2752	-121.847
12	Qgund	48.276	-121.847
1	Qgcoll	48.283	-121.847
2	Qgcoll	48.2809	-121.847
3	Qgcoll	48.2808	-121.847
4	Qgcoll	48.2808	-121.846
5	Qgcoll	48.2807	-121.846
6	Qgcoll	48.2807	-121.846
7	Qgcoll	48.2806	-121.846
8	Qgcoll	48.281	-121.847
9	Qgcoll	48.281	-121.847
10	Qgcoll	48.281	-121.848
11	Qgcoll	48.281	-121.848
12	Qgcoll	48.281	-121.848
13	Qgcoll	48.2817	-121.847
14	Qgcoll	48.2855	-121.847

## Sheet: S2 - Sand Boil Mapping Data
Collins, B.D. and Reid, M.E., 2019, Enhanced landslide mobility by basal liquefaction: The 2014 State Route 530 (Oso), Washington, landslide, GSA Bulletin, https://doi.org/10.1130/B35146.1.
SUPPLEMENTAL DATA SHEET S2: SAND BOIL AND SLOSH PIT MAPPING DATA
General Notes:
1. The sand boil and slosh pit mapping presented in Fig. 6 has been compiled from field mapping performed from April 2014 through September 2015.
2. Point numbers are arbitrarily assigned with no pattern to their order.
3. Slosh pits are tabulated after the sand boils. Some slosh pits also contained sand boils - see "Notes" column.
4. Latitude and longitude are referenced to the North American Datum of 1983 (NAD83) in decimal degrees. All latitude values are North (+); all longitude values are West (-).
5. The number of sand boils indicates the number of independent vents that relieved pore water pressure at a particular location where sand boils were identified.
6. The date mapped is in month/day/year format.
Sand boil or slosh pit point number	Feature type	Latitude	Longitude	Number of sand boils	Date mapped	Notes
		(degrees)	(degrees)		(MM/DD/YYYY)
1	Sand boil	48.281	-121.847	1	2015-09-22
2	Sand boil	48.2782	-121.838	1	2014-09-18
3	Sand boil	48.2781	-121.838	1	2014-09-18
4	Sand boil	48.2786	-121.838	1	2014-08-04
5	Sand boil	48.2779	-121.839	1	2014-08-06
6	Sand boil	48.278	-121.839	1	2014-09-15
7	Sand boil	48.2783	-121.841	1	2014-08-04
8	Sand boil	48.2778	-121.841	1	2014-08-07
9	Sand boil	48.2787	-121.843	1	2014-08-07
10	Sand boil	48.2791	-121.842	1	2014-09-15
11	Sand boil	48.2792	-121.843	1	2014-09-15
12	Sand boil	48.2757	-121.848	1	2014-08-04
13	Sand boil	48.2762	-121.845	1	2014-08-06
14	Sand boil	48.2766	-121.844	3	2014-08-04
15	Sand boil	48.276	-121.848	1	2014-08-04
16	Sand boil	48.2758	-121.848	1	2014-08-04
17	Sand boil	48.2765	-121.849	1	2014-08-04
18	Sand boil	48.2774	-121.847	1	2014-08-04
19	Sand boil	48.2775	-121.846	1	2014-09-15
20	Sand boil	48.2775	-121.846	1	2014-09-15
21	Sand boil	48.2765	-121.849	1	2014-08-04
22	Sand boil	48.2798	-121.841	1	2014-08-03
23	Sand boil	48.2767	-121.844	1	2014-08-03
24	Sand boil	48.2776	-121.844	3	2014-08-03
25	Sand boil	48.2781	-121.845	1	2014-08-03
26	Sand boil	48.2776	-121.845	3	2014-08-03
27	Sand boil	48.2776	-121.844	3	2014-08-03
28	Sand boil	48.2767	-121.848	7	2014-08-04
29	Sand boil	48.2762	-121.848	1	2014-08-04
30	Sand boil	48.2762	-121.849	1	2014-08-04
31	Sand boil	48.2759	-121.848	3	2014-08-04
32	Sand boil	48.2763	-121.847	2	2014-08-04
33	Sand boil	48.2764	-121.848	1	2014-08-04
34	Sand boil	48.2769	-121.848	1	2014-08-04
35	Sand boil	48.2761	-121.848	1	2014-08-04
36	Sand boil	48.2777	-121.847	1	2014-08-04
37	Sand boil	48.279	-121.848	11	2014-08-04
38	Sand boil	48.2761	-121.848	1	2014-08-04
39	Sand boil	48.2761	-121.848	1	2014-08-04
40	Sand boil	48.276	-121.848	1	2014-08-04
41	Sand boil	48.2853	-121.846	2	2014-08-05
42	Sand boil	48.2761	-121.848	1	2014-08-06
43	Sand boil	48.2777	-121.842	1	2014-08-06
44	Sand boil	48.2789	-121.843	1	2014-08-06
45	Sand boil	48.2765	-121.846	1	2014-08-06
46	Sand boil	48.2762	-121.845	1	2014-08-06
47	Sand boil	48.2779	-121.842	4	2014-08-06
48	Sand boil	48.2796	-121.842	1	2014-08-06
49	Sand boil	48.2765	-121.845	1	2014-08-06
50	Sand boil	48.278	-121.842	6	2014-08-06
51	Sand boil	48.2807	-121.845	1	2014-08-07
52	Sand boil	48.2779	-121.84	9	2014-08-08
53	Sand boil	48.2779	-121.84	3	2014-08-08
54	Sand boil	48.2783	-121.839	1	2014-08-08
55	Sand boil	48.278	-121.841	1	2014-08-08
56	Sand boil	48.2775	-121.842	1	2014-08-08
57	Sand boil	48.2764	-121.847	1	2014-08-08
58	Sand boil	48.2779	-121.841	1	2014-08-08
59	Sand boil	48.278	-121.84	1	2014-08-08
60	Sand boil	48.2761	-121.847	4	2014-04-15
61	Sand boil	48.276	-121.847	1	2014-04-15
62	Sand boil	48.2764	-121.847	3	2014-04-15
63	Sand boil	48.2764	-121.847	1	2014-04-15
64	Sand boil	48.2755	-121.846	2	2014-04-17
65	Sand boil	48.2754	-121.846	15	2014-04-17
66	Sand boil	48.2759	-121.846	2	2014-04-17
67	Sand boil	48.2759	-121.846	2	2014-04-17
68	Sand boil	48.2758	-121.845	7	2014-04-17
69	Sand boil	48.2777	-121.841	1	2014-09-15
70	Sand boil	48.2792	-121.843	1	2014-09-15
71	Sand boil	48.2774	-121.846	5	2014-09-15
72	Sand boil	48.2767	-121.845	12	2014-09-15
73	Sand boil	48.2771	-121.845	15	2014-09-15
74	Sand boil	48.279	-121.842	1	2014-09-15
75	Sand boil	48.2776	-121.842	1	2014-09-15
76	Sand boil	48.2778	-121.841	1	2014-09-15
77	Sand boil	48.2777	-121.841	1	2014-09-15
78	Sand boil	48.2776	-121.842	1	2014-09-15
79	Sand boil	48.2775	-121.845	3	2014-09-15
80	Sand boil	48.2788	-121.846	1	2014-09-15
81	Sand boil	48.2793	-121.843	1	2014-09-15
82	Sand boil	48.2771	-121.845	13	2014-09-15
83	Sand boil	48.277	-121.845	1	2014-09-15
84	Sand boil	48.2791	-121.842	2	2014-09-15
85	Sand boil	48.2769	-121.846	1	2014-09-15
86	Sand boil	48.2824	-121.846	4	2014-09-16
87	Sand boil	48.2775	-121.848	7	2014-09-16
88	Sand boil	48.2838	-121.845	4	2014-09-16
89	Sand boil	48.2783	-121.847	1	2014-09-17
90	Sand boil	48.2783	-121.848	65	2014-09-17
91	Sand boil	48.278	-121.838	15	2014-09-18
92	Sand boil	48.278	-121.838	2	2014-09-18
93	Sand boil	48.2761	-121.848	2	2014-04-13
94	Sand boil	48.2758	-121.848	5	2014-04-13
95	Sand boil	48.2761	-121.847	1	2014-04-15
96	Sand boil	48.2774	-121.847	2	2014-08-04
97	Sand boil	48.2782	-121.847	1	2014-08-04
98	Sand boil	48.2787	-121.847	1	2014-08-04
99	Sand boil	48.2781	-121.847	4	2014-08-04
100	Sand boil	48.2782	-121.842	14	2014-08-06
101	Sand boil	48.2786	-121.848	1	2014-08-06
102	Sand boil	48.2784	-121.842	4	2014-08-06
103	Sand boil	48.2786	-121.848	1	2014-08-06
104	Sand boil	48.2779	-121.847	1	2014-09-15
105	Sand boil	48.2773	-121.848	26	2014-09-16
106	Sand boil	48.2784	-121.848	7	2014-09-17
107	Sand boil	48.2771	-121.847	8	2014-09-17
1	Slosh pit	48.2774	-121.847	-	2014-08-04	Slosh pit contains sand boils - see Sand boil point number 96.
2	Slosh pit	48.2782	-121.847	-	2014-08-04	Slosh pit contains sand boils - see Sand boil point number 97.
3	Slosh pit	48.2787	-121.847	-	2014-08-04	Slosh pit contains sand boils - see Sand boil point number 98.
4	Slosh pit	48.2781	-121.847	-	2014-08-04	Slosh pit contains sand boils - see Sand boil point number 99.
5	Slosh pit	48.2782	-121.842	-	2014-08-06	Slosh pit contains sand boils - see Sand boil point number 100.
6	Slosh pit	48.2786	-121.848	-	2014-08-06	Slosh pit contains sand boils - see Sand boil point number 101.
7	Slosh pit	48.2784	-121.842	-	2014-08-06	Slosh pit contains sand boils - see Sand boil point number 102.
8	Slosh pit	48.2786	-121.848	-	2014-08-06	Slosh pit contains sand boils - see Sand boil point number 103.
9	Slosh pit	48.2779	-121.847	-	2014-09-15	Slosh pit contains sand boils - see Sand boil point number 104.
10	Slosh pit	48.2773	-121.848	-	2014-09-16	Slosh pit contains sand boils - see Sand boil point number 105.
11	Slosh pit	48.2784	-121.848	-	2014-09-17	Slosh pit contains sand boils - see Sand boil point number 106.
12	Slosh pit	48.2771	-121.847	-	2014-09-17	Slosh pit contains sand boils - see Sand boil point number 107.
13	Slosh pit	48.2784	-121.842	-	2014-09-15
14	Slosh pit	48.2785	-121.842	-	2014-09-15
15	Slosh pit	48.2783	-121.847	-	2014-09-17
16	Slosh pit	48.2791	-121.846	-	2014-09-17
17	Slosh pit	48.2781	-121.847	-	2014-09-17

## Sheet: S3 - Tree Height Mapping Data
Collins, B.D. and Reid, M.E., 2019, Enhanced landslide mobility by basal liquefaction: The 2014 State Route 530 (Oso), Washington, landslide, GSA Bulletin, https://doi.org/10.1130/B35146.1.
SUPPLEMENTAL DATA SHEET S3: TREE HEIGHT MAPPING DATA
General Notes:
1. The tree mapping presented here and portrayed in Fig. 5B was compiled from mapping performed on orthophoto imagery collected by WSDOT on 14 April 2014.
2. Point numbers are arbitrarily assigned with no pattern to their order.
3. Latitude and longitude are referenced to the North American Datum of 1983 (NAD83) in decimal degrees. All latitude values are North (+); all longitude values are West (-).
4. The data set includes only "complete trees" that could be distinguished by visible root systems and pointed, unbroken tips.
Tree point number	Latitude	Longitude	Length of complete tree
	(degrees)	(degrees)	(m)
1	48.2795	-121.842	28.9388
2	48.2795	-121.843	25.1109
3	48.2793	-121.843	30.4218
4	48.279	-121.842	15.5307
5	48.2786	-121.842	18.4786
6	48.2787	-121.843	36.5819
7	48.2786	-121.843	13.3232
8	48.2783	-121.843	15.2418
9	48.2779	-121.843	33.4957
10	48.2782	-121.844	31.6443
11	48.2785	-121.845	41.5095
12	48.2786	-121.845	23.3632
13	48.2786	-121.845	14.6856
14	48.2791	-121.846	15.4119
15	48.2793	-121.845	38.9595
16	48.2794	-121.845	32.4578
17	48.2799	-121.845	41.7554
18	48.2786	-121.847	27.6514
19	48.2782	-121.845	39.5472
20	48.2783	-121.845	28.5016
21	48.2795	-121.848	57.3175
22	48.2789	-121.848	28.6122
23	48.2791	-121.848	38.5931
24	48.2786	-121.848	42.705
25	48.2787	-121.848	38.7124
26	48.2785	-121.848	39.275
27	48.2788	-121.848	17.2053
28	48.2787	-121.849	14.0479
29	48.2791	-121.849	21.6916
30	48.2783	-121.849	18.6701
31	48.2782	-121.848	32.8905
32	48.278	-121.848	44.5208
33	48.2777	-121.848	26.1814
34	48.2777	-121.847	31.4958
35	48.2778	-121.847	21.8667
36	48.2773	-121.847	40.9614
37	48.2769	-121.846	26.3168
38	48.2769	-121.846	11.8469
39	48.2767	-121.846	35.7785
40	48.2767	-121.846	35.4647
41	48.2759	-121.846	28.2934
42	48.2759	-121.846	29.7026
43	48.2756	-121.846	11.479
44	48.2773	-121.844	15.3623
45	48.2791	-121.843	24.0034
46	48.282	-121.845	38.9007
47	48.2824	-121.845	29.4593
48	48.2825	-121.846	29.1203
49	48.283	-121.846	24.6735
50	48.2835	-121.846	34.9833
51	48.2846	-121.847	28.1016
52	48.2848	-121.848	36.2723
53	48.285	-121.847	35.0289
54	48.2854	-121.848	20.6267
55	48.2851	-121.848	39.1654
56	48.2856	-121.849	36.0917
57	48.2856	-121.849	31.7488
58	48.2845	-121.85	39.4532
59	48.284	-121.851	47.9749
60	48.284	-121.851	45.2838
61	48.2829	-121.851	33.5017
62	48.2834	-121.85	53.4161
63	48.2834	-121.85	51.2295
64	48.2839	-121.85	43.9114
65	48.2837	-121.85	56.0137
66	48.2836	-121.85	27.2074
67	48.2837	-121.85	26.8087
68	48.2832	-121.85	46.3063
69	48.2836	-121.849	25.6792
70	48.2841	-121.85	41.2579
71	48.2839	-121.85	26.1659
72	48.2839	-121.85	32.6203
73	48.2814	-121.848	42.9951
74	48.2815	-121.848	30.2194
75	48.2815	-121.847	40.1402
76	48.2815	-121.846	39.5881
77	48.2818	-121.846	30.3539
78	48.2809	-121.847	46.8234
79	48.281	-121.847	33.5405
80	48.2783	-121.846	34.1594
81	48.2795	-121.842	30.2289
82	48.2802	-121.841	23.9111
83	48.2793	-121.843	29.3854
84	48.2791	-121.842	24.3538
85	48.2787	-121.843	32.7695
86	48.2789	-121.843	35.7074
87	48.2785	-121.843	21.1015
88	48.2784	-121.843	39.0009
89	48.2785	-121.843	44.9667
90	48.2783	-121.843	22.7932
91	48.2789	-121.845	34.583
92	48.2791	-121.845	28.2646
93	48.2795	-121.845	39.0655
94	48.2793	-121.845	31.1936
95	48.2796	-121.844	38.3049
96	48.2799	-121.844	60.9498
97	48.278	-121.846	21.2534
98	48.2775	-121.846	29.883
99	48.2775	-121.845	19.1504
100	48.2796	-121.843	32.7115
101	48.2795	-121.844	40.4911
102	48.2792	-121.845	43.9586
103	48.2788	-121.847	34.4778
104	48.2789	-121.847	46.6305
105	48.2793	-121.847	48.0766
106	48.2792	-121.847	47.2913
107	48.2794	-121.848	33.2597
108	48.2797	-121.848	42.1746
109	48.2796	-121.848	31.7272
110	48.2788	-121.848	35.364
111	48.2784	-121.849	25.7799
112	48.2786	-121.849	42.0668
113	48.2788	-121.849	22.5855
114	48.2786	-121.849	19.4047
115	48.2784	-121.849	19.1274
116	48.2772	-121.847	36.9996
117	48.2773	-121.847	37.802
118	48.2768	-121.847	39.4651
119	48.2764	-121.846	34.7359
120	48.2758	-121.846	40.6929
121	48.2772	-121.845	14.0879
122	48.2783	-121.843	19.369
123	48.2781	-121.843	17.2202
124	48.278	-121.843	15.6786
125	48.2814	-121.844	24.861
126	48.2825	-121.845	30.037
127	48.2829	-121.846	27.7119
128	48.2831	-121.847	21.6372
129	48.2832	-121.847	30.6049
130	48.2835	-121.846	30.5857
131	48.284	-121.846	20.6206
132	48.2849	-121.847	33.1071
133	48.2851	-121.847	32.2456
134	48.2851	-121.848	36.706
135	48.2849	-121.848	28.0317
136	48.285	-121.848	45.6163
137	48.2849	-121.848	49.2079
138	48.285	-121.849	53.5914
139	48.2852	-121.849	37.9254
140	48.285	-121.849	46.3839
141	48.2847	-121.849	45.2972
142	48.2844	-121.849	38.4352
143	48.2792	-121.844	33.4693
144	48.2857	-121.848	30.5051
145	48.2856	-121.848	37.0405
146	48.2855	-121.849	37.4547
147	48.2855	-121.849	27.7472
148	48.2855	-121.848	26.6971
149	48.2855	-121.848	24.751
150	48.2855	-121.848	32.5099
151	48.2857	-121.848	25.9313
152	48.2854	-121.848	38.1573
153	48.2854	-121.848	29.4873
154	48.2855	-121.849	33.8789
155	48.2857	-121.849	29.5663
156	48.2853	-121.849	32.7441
157	48.2853	-121.849	26.6574
158	48.285	-121.849	30.3957
159	48.2852	-121.85	36.7049
160	48.2849	-121.849	35.9912
161	48.2848	-121.85	44.6801
162	48.2847	-121.85	24.7588
163	48.2846	-121.85	18.296
164	48.2847	-121.85	47.3182
165	48.2847	-121.851	36.1867
166	48.2845	-121.851	31.4156
167	48.2844	-121.851	34.7993
168	48.2845	-121.851	33.4245
169	48.2843	-121.851	48.7625
170	48.2843	-121.851	39.338
171	48.2844	-121.851	25.3837
172	48.2841	-121.851	32.7245
173	48.2842	-121.851	46.1417
174	48.2836	-121.851	39.4654
175	48.2834	-121.851	51.1706
176	48.2835	-121.85	39.6502
177	48.2833	-121.851	44.5102
178	48.2831	-121.851	42.0546
179	48.2832	-121.851	35.8576
180	48.2832	-121.85	44.9654
181	48.2828	-121.851	34.5878
182	48.2833	-121.85	40.1801
183	48.2832	-121.85	39.1622
184	48.2837	-121.85	43.7919
185	48.2831	-121.85	41.5625
186	48.283	-121.85	47.0846
187	48.2828	-121.849	38.3503
188	48.283	-121.85	23.4038
189	48.283	-121.85	22.7926
190	48.2831	-121.849	30.1912
191	48.283	-121.849	22.4618
192	48.2838	-121.849	50.1758
193	48.2839	-121.849	34.5236
194	48.2844	-121.849	49.4415
195	48.2843	-121.85	37.3465
196	48.2845	-121.849	52.0143
197	48.2843	-121.849	30.8481
198	48.2846	-121.849	28.8835
199	48.2846	-121.849	55.829
200	48.2843	-121.849	23.9058
201	48.2843	-121.849	31.877
202	48.2844	-121.849	40.3696
203	48.2841	-121.849	42.2433
204	48.2841	-121.85	32.9764
205	48.284	-121.851	40.678
206	48.2838	-121.85	25.5149
207	48.2821	-121.849	23.5446
208	48.2824	-121.849	19.0439
209	48.2808	-121.848	51.6672
210	48.2808	-121.848	40.5472
211	48.2808	-121.848	45.6447
212	48.2807	-121.848	25.6115
213	48.281	-121.848	48.286
214	48.2809	-121.847	35.3214
215	48.2812	-121.848	37.636
216	48.2815	-121.848	34.1194
217	48.2815	-121.848	28.9564
218	48.2816	-121.847	39.3075
219	48.2817	-121.846	34.7511
220	48.2818	-121.847	26.072
221	48.2822	-121.846	52.1943
222	48.2817	-121.846	24.3201
223	48.2809	-121.846	34.1337
224	48.2806	-121.847	28.9864
225	48.2806	-121.847	26.8814
226	48.2805	-121.847	29.044
227	48.2806	-121.847	30.9788
228	48.2805	-121.847	38.6428
229	48.2784	-121.846	37.2795
230	48.278	-121.845	20.1309
231	48.2782	-121.845	15.8044
232	48.2782	-121.845	14.258

## Sheet: S4 - Soil Grain Size Data
Collins, B.D. and Reid, M.E., 2019, Enhanced landslide mobility by basal liquefaction: The 2014 State Route 530 (Oso), Washington, landslide, GSA Bulletin, https://doi.org/10.1130/B35146.1.
SUPPLEMENTAL DATA SHEET S4: SOIL GRAIN SIZE DISTRIBUTION DATA
General Notes:
1. The soil grain size distribution data for the grain size distribution curves in Fig. 14 are presented here.
2. Six different soil types are presented (sand boils, n=8; alluvium, n=4; and one each for Qgoe, Qgtv, Qgov, and Qglv).
3. Data for sand boils and alluvium were performed either in collaboration with the University of California, Geotechnical Engineering Laboratory, or with Cooper Testing Labs (Palo Alto, California).
4. Data for glacial units (Qgoe, Qgtv, Qgov, Qglv) are from Riemer et al (2015).
5. Depending on soil type, some samples were tested only using sieve analysis, whereas others were tested using both sieve analysis and hydrometer methods (following ASTM D422-63, 2007).
Sample #	Soil type	Diameter	Percent passing
		(mm)	(%)
SB-1	sand boil	4.76	1
		2	0.998
		0.595	0.881
		0.42	0.78
		0.297	0.63
		0.149	0.359
		0.074	0.139
SB-3	sand boil	12.7	1
		4.76	0.986
		2	0.968
		0.595	0.895
		0.42	0.836
		0.297	0.758
		0.149	0.529
		0.074	0.351
		0.053	0.285
		0.0318	0.228
		0.0205	0.19
		0.012	0.167
		0.0086	0.143
		0.0062	0.127
		0.0045	0.103
		0.0031	0.091
		0.0022	0.075
		0.0013	0.058
KS-14OS-14	sand boil	2	1
		0.595	0.997
		0.42	0.991
		0.297	0.978
		0.149	0.757
		0.074	0.391
		0.053	0.242
		0.0337	0.107
		0.022	0.052
		0.0128	0.042
		0.0091	0.031
		0.0065	0.025
		0.0046	0.018
		0.0032	0.018
		0.0023	0.015
		0.0013	0.014
KS-14OS-19	sand boil	4.76	1
		2	0.999
		0.595	0.99
		0.42	0.973
		0.297	0.886
		0.149	0.33
		0.074	0.102
KS-14OS-40	sand boil	4.76	1
		2	0.974
		0.595	0.584
		0.42	0.461
		0.297	0.315
		0.149	0.186
		0.074	0.103
BDC-04132014-7	sand boil	4.699	0.999583
		2	0.997498
		1.168	0.992494
		0.84	0.976647
		0.59	0.932027
		0.417	0.817765
		0.295	0.520851
		0.246	0.44829
		0.149	0.165138
		0.075	0.037573
BDC-09242015-1	sand boil	12.7	1
		4.76	1
		2	0.992
		0.595	0.97
		0.42	0.944
		0.297	0.886
		0.149	0.563
		0.074	0.22
		0.053	0.137
		0.0342	0.089
		0.0218	0.078
		0.0126	0.073
		0.009	0.067
		0.0064	0.061
		0.0046	0.052
		0.0032	0.041
		0.0023	0.038
		0.0013	0.03
BDC-09242015-11	sand boil	4.76	1
		2	0.999
		0.595	0.985
		0.42	0.961
		0.297	0.901
		0.149	0.554
		0.074	0.195
		0.053	0.109
		0.0348	0.06
		0.0222	0.043
		0.0129	0.034
		0.0092	0.025
		0.0065	0.024
		0.0047	0.015
		0.0032	0.015
		0.0023	0.014
		0.0013	0.01
BDC-09172014-1	alluvium	4.75	0.995917
		2.36	0.964489
		1.18	0.891619
		0.589	0.682715
		0.295	0.198737
		0.147	0.0325836
		0.075	0.0190263
BDC-09182014-1	alluvium	9.51	1
		4.76	0.997
		2	0.996
		0.595	0.988
		0.42	0.969
		0.297	0.886
		0.149	0.42
		0.074	0.228
		0.053	0.178
		0.0335	0.129
		0.0215	0.104
		0.0125	0.087
		0.0089	0.074
		0.0063	0.064
		0.0045	0.052
		0.0032	0.039
		0.0022	0.036
		0.0013	0.026
BDC-09182014-4	alluvium	4.8	1
		2.36	1
		1.18	0.999084
		0.589	0.995827
		0.295	0.921832
		0.147	0.493333
		0.075	0.35
		0.0516194	0.316
		0.0424063	0.307
		0.0313262	0.2393
		0.0221147	0.2077
		0.0161793	0.1851
		0.0119693	0.1625
		0.00857078	0.1399
		0.0061055	0.1264
		0.00434885	0.1129
		0.00316391	0.0993
		0.00227299	0.0858
		0.00180517	0.0813
		0.00120166	0.0722
BDC-09182014-7	alluvium	4.8	0.995839
		2.36	0.988314
		1.18	0.978931
		0.589	0.920237
		0.295	0.655542
		0.147	0.221848
		0.075	0.17
		0.0645	0.158723
		0.0459	0.151165
		0.0328	0.136048
		0.0234	0.120932
		0.0166	0.120932
		0.0122	0.105815
		0.0087	0.0944779
		0.0062	0.0869197
		0.0044	0.0755823
		0.0033	0.0718032
		0.0024	0.0604658
		0.0019	0.0566867
		0.0012	0.0491285
H-1-14-D3	Recessional outwash (Qgoe)	4.75	0.885653
		2.36	0.838306
		1.18	0.742719
		0.589	0.490799
		0.295	0.271038
		0.147	0.183491
		0.075	0.142398
		0.0665539	0.119826
		0.0474087	0.109253
		0.0336046	0.105729
		0.0239915	0.0916315
		0.0171253	0.0775343
		0.0125648	0.0704857
		0.0089257	0.0634372
		0.00554052	0.0422914
		0.0045339	0.0387672
		0.003036	0.0317186
		0.00128098	0.02467
H-1-14-@176#1	Till (Qgtv)	4.75	0.890885
		2.36	0.840185
		1.18	0.79169
		0.589	0.74099
		0.295	0.685881
		0.147	0.613138
		0.075	0.558029
		0.0500075	0.527164
		0.0365793	0.492595
		0.0262857	0.475311
		0.0190238	0.449385
		0.0138532	0.414817
		0.0104018	0.380249
		0.00755121	0.345681
		0.00547463	0.311113
		0.00371027	0.276545
		0.00285169	0.250619
		0.0019603	0.224693
		0.00159524	0.207409
		0.00109623	0.181483
		0.00095831	0.17284
H-1-14-C34A	Advance outwash (Qgov)	4.75	1
		2.36	1
		1.18	1
		0.425	0.998885
		0.25	0.996656
		0.147	0.986624
		0.105	0.847286
		0.075	0.471631
		0.0592361	0.308527
		0.0458816	0.178621
		0.0334412	0.129906
		0.0239344	0.109608
		0.0171253	0.0893105
		0.0125648	0.0811913
		0.00896653	0.0649531
		0.00636903	0.0568339
		0.00434634	0.0487148
		0.00308018	0.0446552
		0.00245829	0.0405957
H-1-14-C64	Lacustrine (Qglv)	0.0461321	0.981782
		0.0332854	0.953529
		0.0241113	0.918213
		0.0175247	0.875834
		0.0125019	0.861708
		0.00929339	0.776949
		0.00694652	0.73457
		0.00563735	0.663939
		0.00380708	0.593307
		0.00278765	0.515612
		0.0020472	0.452043
		0.00172618	0.409664
		0.0012113	0.367285
		0.000844035	0.31078

## Sheet: S5 - Soil Triaxial Test Data
Collins, B.D. and Reid, M.E., 2019, Enhanced landslide mobility by basal liquefaction: The 2014 State Route 530 (Oso), Washington, landslide, GSA Bulletin, https://doi.org/10.1130/B35146.1.
SUPPLEMENTAL DATA SHEET S5: SOIL TRIAXIAL TEST DATA
General Notes:
1. The data for the geotechnical triaxial test results presented in Figure 16 for typical alluvium from the North Fork Stillaguamish River are presented here.
2. Each test label describes the type of sample tested (All layers, Layer 2, Layer 3) and the confinement stress (σr) under which testing occurred.
3. All tests were consolidated-undrained (CU) triaxial tests.
4. All tests were performed in a strain-controlled loading device moving at 1.524 mm/minute (~1% strain/minute).
5. Strain data has been corrected so that 0% strain coincides with the time at which the sample began to experience in increase in q.
6. p' represents the mean effective stress (i.e., p' = (σ’a+ 2σ’r)/3) where σa is the axial stress and σr is the radial stress.
7. q represents the deviator stress (q = σa – σr)
8. Data plotted for q in Fig. 16 is a running mean of 30 values. This is performed to reduce noise in the data.
All layers (BDC-07122016-2) at σr = 20 kPa			All layers (BDC-07122016-1) at σr = 100 kPa			Layer 2 (BDC-07122016-19) at σr = 20kPa			Layer 2 (BDC-07122016-19) at σr = 100kPa			Layer 3 (BDC-07122016-19) at σr = 20kPa			Layer 3 (BDC-07122016-19) at σr = 100kPa
Strain	p'	q	Strain	p'	q	Strain	p'	q	Strain	p'	q	Strain	p'	q	Strain	p'	q
(%)	(kPa)	(kPa)	(%)	(kPa)	(kPa)	(%)	(kPa)	(kPa)	(%)	(kPa)	(kPa)	(%)	(kPa)	(kPa)	(%)	(kPa)	(kPa)
0	15.9725	-11.824	0	96.8772	-5.84741	0	16.5536	-8.18663	0	97.2605	-5.61275	0	15.4973	-8.29416	0.0109217	98.4035	-5.24558
0	16.6669	-8.97448	0.00345217	97.7113	-2.57875	0.00382263	16.4098	-7.8525	0.00375196	97.0892	-4.59592	0.00359138	15.4971	-8.29482	0.0145844	98.7273	-4.27403
0	17.4811	-6.53203	0.0207329	97.2324	5.17804	0.00382263	16.665	-7.8525	0.0186234	97.4273	-3.58183	0.00724927	15.4968	-8.2955	0.0145844	98.7662	-4.92225
0	18.5827	-2.4613	0.0276439	98.6445	11.713	0.00382263	16.665	-7.8525	0.0186234	98.0766	-0.868498	0.00724927	15.6039	-7.97429	0.0145844	98.7662	-4.92225
0.00345446	19.1248	-0.834798	0.0345615	98.8987	17.8383	0.0113984	16.5209	-7.51914	0.0223753	97.9341	-0.530344	0.00724927	15.6039	-7.97429	0.0218434	98.9818	-4.27566
0.0103634	19.9377	1.60378	0.0414725	98.2161	21.9197	0.0113984	16.7761	-7.51914	0.0223753	97.9051	0.147958	0.00724927	15.6039	-7.97429	0.0218434	98.9818	-4.27566
0.0138178	20.0727	2.00891	0.0587532	97.9222	26.4008	0.0113984	16.7761	-7.51914	0.0260591	97.8468	1.50349	0.0181564	15.3481	-7.97633	0.0291023	98.9812	-4.2773
0.0172723	19.8326	2.82099	0.0622054	98.687	32.5261	0.0113984	16.7761	-7.51914	0.0260591	97.6177	3.87746	0.0181564	15.3481	-7.97633	0.0327651	99.089	-3.95407
0.0242477	20.2542	4.85196	0.0725752	97.8327	34.5599	0.0113984	16.7761	-7.51914	0.029811	97.2201	4.21541	0.0217478	15.3479	-7.97701	0.0364278	99.3437	-3.95491
0.0311566	20.5242	5.66181	0.0725752	97.8152	39.8705	0.0113984	16.7761	-7.51914	0.033563	97.898	6.2489	0.0217478	15.3479	-7.97701	0.0436867	99.3431	-3.95657
0.0311566	20.0135	5.6618	0.082945	97.8458	41.4944	0.0113984	16.9993	-6.84949	0.033563	97.982	7.26624	0.0217478	15.3479	-7.97701	0.0436867	98.7251	-4.28059
0.0311566	19.774	6.47573	0.0898559	96.379	44.7555	0.0113984	16.7761	-7.51914	0.0446824	98.1777	8.61868	0.0217478	15.0928	-7.97701	0.0472829	98.8329	-3.95739
0.0311566	20.0453	7.2896	0.103685	95.9311	48.0087	0.0113984	16.7761	-7.51914	0.0484344	98.6002	10.6517	0.0217478	15.0928	-7.97701	0.0546084	98.8323	-3.95906
0.034611	20.7228	9.32219	0.103685	95.7263	50.4589	0.0113984	16.9993	-6.84949	0.0521864	98.5706	11.3284	0.0217478	15.0928	-7.97701	0.0582046	99.048	-3.31194
0.0449744	20.2098	9.31567	0.114048	96.4034	52.4901	0.0113984	16.9993	-6.84949	0.0558701	98.286	12.005	0.0254057	15.0926	-7.97769	0.0546084	99.0483	-3.31109
0.0449744	20.3614	10.5364	0.131328	95.1538	54.1045	0.0113984	16.7441	-6.84949	0.0596221	98.4824	13.3596	0.0254057	15.6028	-7.97769	0.0582046	99.048	-3.31194
0.0484289	20.7516	10.941	0.138246	94.8103	56.1384	0.0151515	16.2018	-6.18061	0.0670578	98.026	15.0516	0.0290636	15.7096	-7.65724	0.0582046	98.832	-3.95989
0.0484289	21.0388	12.5685	0.141698	94.604	58.5839	0.0189741	16.2015	-6.18142	0.0670578	97.4575	16.4076	0.0290636	15.4545	-7.65724	0.0582046	98.832	-3.95989
0.0518833	21.5646	13.38	0.148609	94.8903	60.2091	0.0227968	16.4564	-6.18222	0.0708097	97.5699	16.7449	0.0363128	15.5611	-7.33751	0.072789	98.5756	-3.96322
0.0518833	21.7002	13.7868	0.155527	93.372	61.0173	0.0265499	16.6793	-5.51346	0.0670578	97.7674	18.1026	0.0363128	15.5611	-7.33751	0.0763852	99.1152	-2.34447
0.0587923	21.8343	14.189	0.16589	93.4182	63.4542	0.0265499	16.7909	-5.17869	0.0708097	98.3318	19.7958	0.0363128	15.5611	-7.33751	0.0763852	98.821	-1.69664
0.0587923	21.8502	15.0027	0.169349	92.412	64.2662	0.0341952	17.0135	-4.51088	0.0744935	97.1396	20.811	0.0363128	15.6681	-7.0164	0.0800479	98.6735	-1.37366
0.0657012	22.1198	15.8116	0.183171	92.984	67.5146	0.0379483	16.503	-4.51173	0.0744935	97.2235	21.8279	0.0363128	15.7751	-6.69529	0.0837107	98.7812	-1.0507
0.0726101	22.2538	16.2136	0.183171	90.9409	67.5145	0.0379483	16.5826	-3.50752	0.0856812	96.6823	22.5003	0.0363128	15.8822	-6.37418	0.0873069	98.9576	0.243886
0.0726101	22.6606	17.4339	0.196999	91.6153	69.5377	0.0379483	16.3275	-3.50752	0.0894331	97.0206	23.5152	0.0399707	15.8409	-5.73272	0.0873069	98.7025	0.243886
0.0726101	22.7962	17.8407	0.20391	90.3522	70.3453	0.0417709	16.4388	-3.1737	0.0894331	97.0206	23.5152	0.0399707	16.0139	-4.44832	0.0909696	98.8789	1.53838
0.0760646	22.1648	18.245	0.221191	89.4594	70.7314	0.0493467	16.5498	-2.84083	0.100621	97.4413	25.5428	0.04722	16.0134	-4.44993	0.101891	98.9858	1.85911
0.0830399	22.6739	18.24	0.221191	90.0033	72.3631	0.0569224	16.9158	-2.50801	0.100621	97.157	26.2206	0.04722	15.6102	-4.12886	0.10915	99.7013	4.7713
0.0899488	22.5682	19.4552	0.231561	89.2328	72.35	0.0569224	16.7723	-2.17333	0.100621	96.8727	26.8983	0.04722	15.7172	-3.80778	0.10915	99.6621	5.41891
0.0899488	22.4483	19.8619	0.238472	88.4802	73.1568	0.0607451	16.7719	-2.17429	0.108056	96.6708	28.5886	0.04722	15.7172	-3.80778	0.112813	99.4361	7.03671
0.0899488	22.3286	20.2686	0.248842	88.5088	74.7749	0.0758966	16.9937	-1.50887	0.108056	95.7634	28.9275	0.0508114	15.931	-3.16646	0.112813	99.3968	7.6843
0.0968578	22.9889	21.4835	0.262663	87.2259	74.7571	0.0758966	16.9617	-0.839652	0.108056	95.5082	28.9275	0.0544693	15.8897	-2.52522	0.112813	99.3184	8.97948
0.100312	23.1236	21.8876	0.266122	86.7302	75.5683	0.0758966	16.7066	-0.839652	0.108056	95.7341	29.6052	0.0544693	15.9967	-2.20416	0.112813	99.495	10.2747
0.107221	23.1218	21.8824	0.266122	86.6107	75.9758	0.0758966	16.8182	-0.505042	0.119244	95.5606	30.6153	0.0581272	15.9964	-2.20506	0.123735	100.033	11.8894
0.107221	22.8665	21.8824	0.273033	86.097	75.9669	0.0758966	16.8182	-0.505042	0.12668	95.1619	30.9498	0.0581272	16.1034	-1.88402	0.130994	99.6986	13.1815
0.110676	23.4078	23.5061	0.290314	85.8505	76.7597	0.0758966	16.5951	-1.17426	0.12668	94.5095	31.2886	0.0617185	15.848	-1.88491	0.130994	100.238	14.8002
0.110676	23.4078	23.5061	0.304136	85.4694	77.1489	0.0758966	16.5951	-1.17426	0.12668	94.7062	32.6438	0.0617185	15.848	-1.88491	0.130994	100.454	15.4477
0.110676	23.6789	24.3196	0.307595	84.4465	77.1446	0.0758966	16.7386	-1.50887	0.130432	94.3081	32.9803	0.0617185	16.3171	-1.24285	0.130994	99.4236	17.7139
0.11413	23.678	24.3169	0.314506	84.4597	77.9506	0.0797192	16.7383	-1.50986	0.130432	94.2788	33.6579	0.0617185	16.1279	-0.279765	0.130994	99.7081	19.3326
0.117585	23.6771	24.3142	0.314506	84.4761	78.7657	0.0797192	16.4832	-1.50986	0.134116	93.4835	34.3332	0.0762836	16.2337	0.0373685	0.130994	100.032	20.3038
0.117585	23.9324	24.3142	0.331786	84.0935	79.1502	0.0835418	16.3714	-1.84543	0.134116	93.7093	35.0107	0.0762836	16.2337	0.0373685	0.138253	99.3733	20.6241
0.121039	23.9315	24.3115	0.335245	82.44	79.5529	0.0835418	16.1163	-1.84543	0.134116	93.1699	35.6883	0.0762836	16.3407	0.358351	0.141915	99.9808	23.212
0.134857	23.8082	24.7074	0.345615	82.4354	79.5389	0.0835418	15.9727	-1.51084	0.141619	92.0056	36.0223	0.0762836	16.1924	0.679333	0.141915	99.9414	23.8594
0.138378	24.0782	25.5175	0.355978	81.6647	79.5252	0.0835418	16.0842	-1.17626	0.145303	92.0048	36.0199	0.0762836	16.5546	1.00032	0.149174	100.44	26.1214
0.138378	23.5674	25.5175	0.362896	81.9493	81.1452	0.087295	15.43	-0.842665	0.152807	91.606	36.3539	0.0762836	16.5546	1.00032	0.152837	100.577	28.0615
0.141832	23.8375	26.3277	0.362896	81.5744	81.5527	0.0986934	15.5405	-0.511143	0.160243	91.3493	36.3491	0.079875	16.4061	1.32029	0.156433	100.537	28.7068
0.148741	23.8356	26.3221	0.376718	80.802	81.5341	0.102516	16.162	-0.177645	0.160243	91.3493	36.3491	0.079875	15.8959	1.32029	0.163692	100.496	29.35
0.15565	23.9693	26.7232	0.39054	80.9314	81.9223	0.102516	16.2735	0.156876	0.167679	91.3184	37.0217	0.0835329	15.8956	1.31927	0.167355	100.888	31.2898
0.15565	23.7139	26.7232	0.404368	80.4144	81.9033	0.102516	15.7632	0.156876	0.167679	91.0339	37.699	0.0835329	15.8956	1.31927	0.167355	100.77	33.2315
0.159104	24.1194	27.9397	0.411279	79.1343	81.894	0.106269	15.5077	0.155847	0.167679	90.7202	39.0536	0.0835329	15.3854	1.31927	0.174614	100.984	33.8743
0.162559	24.1185	27.9369	0.414738	79.1327	81.8892	0.106269	15.5077	0.155847	0.171431	89.6988	39.0511	0.0835329	15.3854	1.31927	0.181939	100.58	34.1934
0.162559	24.3739	27.9368	0.421649	78.3635	81.8799	0.106269	15.3962	-0.178662	0.175114	89.4429	39.0487	0.0835329	15.4923	1.64023	0.181939	100.648	35.1641
0.166013	24.5084	28.3405	0.421649	78.4992	82.2871	0.113914	15.3956	-0.180733	0.178866	89.2999	39.3848	0.0835329	15.4923	1.64023	0.181939	99.9515	36.1348
0.169468	24.5075	28.3377	0.43893	77.4699	82.2635	0.117668	15.3952	-0.18175	0.190054	88.7872	39.3773	0.0835329	15.3442	1.96118	0.185535	100.451	38.3975
0.169468	24.5075	28.3377	0.452752	77.4636	82.2446	0.12149	15.5064	0.151672	0.190054	88.7872	39.3773	0.0907821	15.4505	2.28004	0.189198	100.518	39.3658
0.179831	24.5047	28.3292	0.456211	77.2066	82.24	0.125313	15.2509	0.150623	0.19749	88.6433	39.7109	0.0835329	15.4512	2.28214	0.196457	100.948	40.655
0.179831	24.64	28.7353	0.456211	76.9512	82.2399	0.129066	15.362	0.484026	0.19749	88.2459	40.0495	0.0907821	15.6645	2.92191	0.196457	99.7804	40.9786
0.183286	25.1499	28.7325	0.473491	77.079	82.6233	0.129066	15.0748	1.15289	0.201242	88.2451	40.0469	0.0980979	15.6637	2.91975	0.20012	100.348	44.2112
0.18674	25.2844	29.1361	0.480402	77.2114	83.0205	0.132889	15.1859	1.48622	0.208677	88.214	40.7189	0.101689	15.7704	3.23958	0.20012	99.3273	44.2112
0.190195	25.1635	29.5396	0.483861	76.6991	83.0158	0.136642	15.4085	2.15396	0.208677	87.6743	41.396	0.101689	15.5153	3.23958	0.203716	99.3554	45.8262
0.193649	24.5317	29.9428	0.497683	76.0781	84.2176	0.155685	15.4066	2.14835	0.208677	87.532	41.7345	0.101689	15.7292	3.88138	0.211042	99.3536	45.8208
0.193649	25.2979	29.9428	0.497683	75.8228	84.2175	0.155685	15.1515	2.14835	0.212429	87.3889	42.0704	0.101689	15.4741	3.88138	0.214638	99.0976	45.8182
0.19717	24.7862	29.9399	0.514964	75.5594	84.1936	0.155685	15.1515	2.14835	0.219865	85.7143	42.4037	0.108939	15.6873	4.52092	0.2183	99.0178	47.1094
0.200624	24.7852	29.937	0.514964	75.304	84.1936	0.155685	15.0079	2.48269	0.219865	85.7143	42.4037	0.108939	15.4322	4.52092	0.2183	99.7725	49.3735
0.204079	24.9197	30.3405	0.532245	75.0406	84.1695	0.155685	15.0079	2.48269	0.219865	85.8271	42.7422	0.108939	15.5391	4.8418	0.221897	99.9477	50.6646
0.210988	24.9177	30.3346	0.539156	74.7821	84.1601	0.167014	15.0067	2.47932	0.223549	85.4583	42.4011	0.105347	15.5395	4.84293	0.229222	99.4356	50.6589
0.217897	24.5405	30.7351	0.549525	74.7773	84.1458	0.170837	14.7513	2.47818	0.227301	84.692	42.3985	0.108939	15.5391	4.8418	0.232818	98.9533	52.2731
0.217897	24.5405	30.7351	0.552984	74.265	84.1411	0.170837	15.1178	2.81248	0.227301	84.8049	42.737	0.105347	15.7946	4.84293	0.232818	98.806	52.5965
0.221351	24.6749	31.1382	0.566806	74.0032	84.1219	0.174659	15.2611	2.47705	0.227301	84.5498	42.737	0.116254	16.1555	5.16034	0.232818	98.5114	53.2433
0.22826	25.1836	31.1323	0.577176	73.623	84.5137	0.186058	15.1163	2.8079	0.238488	84.3753	43.7443	0.108939	15.9012	5.16268	0.232818	98.4719	53.8901
0.22826	25.5744	31.5385	0.584087	73.2291	84.0978	0.186058	14.6061	2.8079	0.24224	84.2322	44.0801	0.108939	16.0082	5.48355	0.232818	98.0299	54.8604
0.22826	25.9806	32.757	0.597909	72.4566	84.0788	0.189811	14.6057	2.80677	0.245924	83.9762	44.0774	0.108939	15.7119	6.12531	0.236481	97.7738	54.8574
0.22826	25.7252	32.757	0.604826	72.5887	84.4752	0.189811	14.6057	2.80677	0.257112	83.9735	44.0694	0.112596	15.7115	6.12411	0.250999	97.9459	56.1389
0.231715	25.7242	32.754	0.608279	72.7227	84.8771	0.189811	14.6057	2.80677	0.260864	83.2073	44.0667	0.112596	15.8184	6.44497	0.258324	98.0516	56.4561
0.231715	25.7242	32.754	0.618648	72.7178	84.8626	0.189811	14.7171	3.141	0.264547	82.9513	44.0641	0.123504	15.8172	6.44136	0.258324	97.9725	57.7494
0.242078	25.7212	32.7451	0.618648	71.9517	84.8625	0.201209	14.4608	3.13753	0.264547	82.1859	44.0641	0.123504	15.8172	6.44136	0.261921	97.8924	59.0396
0.242078	25.7212	32.745	0.625559	71.9485	84.8528	0.201209	14.2057	3.13753	0.264547	82.0436	44.4024	0.127161	15.5617	6.44014	0.261921	97.2348	59.3629
0.255962	25.7172	32.7331	0.649758	71.6819	84.8193	0.205032	14.3167	3.47054	0.272051	81.7867	44.397	0.130753	15.8164	6.43895	0.261921	96.8323	59.6862
0.262871	25.7152	32.7271	0.656669	71.4233	84.8096	0.220183	14.1714	3.80001	0.272051	81.7867	44.397	0.130753	15.8164	6.43895	0.269246	96.7906	60.3265
0.262871	25.3399	33.1332	0.656669	71.1678	84.8095	0.220183	13.9163	3.80001	0.275735	81.7267	45.7475	0.130753	15.8164	6.43895	0.272842	96.8182	61.9397
0.262871	25.3399	33.1332	0.66358	71.1647	84.8001	0.224006	14.1386	4.46705	0.275735	81.2165	45.7475	0.134411	16.1368	7.40012	0.276505	96.562	61.9364
0.262871	25.986	33.5393	0.66358	71.1647	84.8	0.227759	14.1382	4.46585	0.279487	81.1028	45.4065	0.138002	16.1364	7.3989	0.280101	96.2662	62.5798
0.262871	25.7306	33.5393	0.68086	70.6459	84.7759	0.227759	14.1382	4.46585	0.290675	80.9577	45.7366	0.138002	15.371	7.3989	0.280101	96.2662	62.5798
0.273235	25.983	33.5303	0.684319	70.6443	84.7711	0.231582	13.9151	3.79646	0.294358	80.3339	45.3956	0.14166	15.3293	8.0392	0.280101	95.756	62.5798
0.273235	26.1182	33.936	0.7016	70.6363	84.747	0.231582	13.8827	4.46464	0.290675	80.0797	45.3983	0.14166	15.3293	8.0392	0.280101	95.4217	63.8728
0.273235	26.2536	34.3421	0.705052	70.1239	84.7422	0.235405	13.6596	3.79527	0.290675	79.8245	45.3983	0.14166	15.4363	8.35997	0.283764	95.2732	64.1927
0.276689	26.1172	33.933	0.715422	69.6084	84.7279	0.24298	13.6588	3.79292	0.294358	78.8032	45.3956	0.152567	15.5832	8.0354	0.287427	95.4875	64.8358
0.287052	26.3848	34.7359	0.725792	69.6036	84.7134	0.24298	13.1486	3.79292	0.294358	78.8032	45.3956	0.152567	15.5832	8.0354	0.301945	95.6985	65.4688
0.290507	26.3838	34.7329	0.739614	69.3418	84.6941	0.246803	13.1482	3.79173	0.305546	78.5454	45.3875	0.152567	15.6901	8.35614	0.305607	95.363	66.7581
0.293961	25.8721	34.7298	0.739614	69.4771	85.1001	0.246803	13.8022	3.45769	0.309298	78.6572	45.7229	0.152567	15.6901	8.35614	0.312866	95.2134	67.0745
0.297416	25.8711	34.7268	0.749983	68.9615	85.0857	0.246803	13.0369	3.45769	0.316734	78.2875	45.3793	0.152567	15.9039	8.99762	0.312866	95.066	67.3976
0.297416	26.1264	34.7268	0.760353	68.7013	85.0712	0.258132	13.2584	4.12221	0.320486	78.3993	45.7147	0.152567	16.1177	9.63909	0.312866	94.3007	67.3976
0.30087	25.8701	34.7238	0.767264	68.6981	85.0616	0.261954	13.4806	4.78898	0.324169	77.8882	45.712	0.152567	15.8626	9.63909	0.312866	94.261	68.0439
0.304325	26.2596	35.1263	0.767264	68.698	85.0615	0.26953	13.336	5.12051	0.327921	77.3771	45.7093	0.152567	15.6488	8.99762	0.312866	94.261	68.0439
0.304325	26.515	35.1263	0.774175	68.3043	84.6461	0.26953	12.5707	5.12051	0.331673	77.4889	46.0446	0.156225	16.0104	9.31703	0.331047	94.686	69.319
0.304325	26.515	35.1263	0.791456	68.6868	85.0277	0.26953	12.7145	4.78655	0.331673	77.4592	46.7208	0.156225	16.0104	9.31703	0.331047	94.5386	69.642
0.307779	26.5139	35.1232	0.798367	68.6835	85.018	0.273353	12.7141	4.78532	0.335357	77.3158	47.0562	0.163474	15.6475	8.99372	0.331047	94.2835	69.642
0.3113	26.5129	35.1201	0.801826	68.4267	85.0133	0.273353	12.459	4.78532	0.335357	76.8056	47.0562	0.163474	15.7544	9.31442	0.331047	93.6258	69.9651
0.321663	26.5098	35.1108	0.815648	68.2999	85.3993	0.280929	12.602	4.44897	0.335357	76.2954	47.0562	0.170724	15.8604	9.63249	0.331047	93.3707	69.9651
0.321663	26.6451	35.5167	0.826017	68.0397	85.3847	0.280929	12.7133	4.78289	0.339109	75.6716	46.7153	0.163474	15.9682	9.95583	0.33471	93.1824	70.9308
0.321663	26.2544	35.1109	0.832928	68.0364	85.375	0.292327	12.7121	4.77923	0.35398	74.9026	46.7042	0.174381	15.9669	9.95182	0.338306	93.2492	71.8965
0.328572	26.2676	35.9164	0.843298	67.5208	85.3605	0.299903	12.7113	4.7768	0.35398	74.9026	46.7042	0.174381	16.0738	10.2725	0.341969	93.3557	72.2159
0.335481	26.5209	35.9102	0.860579	67.2575	85.3364	0.299903	12.4887	4.10908	0.361484	74.9007	46.6986	0.177973	16.0733	10.2712	0.345631	92.5892	72.2123
0.338936	26.655	36.3126	0.860579	67.1224	84.9312	0.299903	12.4562	4.7768	0.361484	74.9007	46.6986	0.174381	16.0738	10.2725	0.35289	92.7623	73.4971
0.34239	26.5339	36.7153	0.870949	67.1324	85.7273	0.303725	12.4558	4.77557	0.365168	74.7574	47.0339	0.177973	15.8182	10.2712	0.35289	92.5072	73.4971
0.34239	26.5339	36.7153	0.874407	67.1307	85.7223	0.303725	12.3119	5.10942	0.36892	74.2461	47.0311	0.177973	15.67	10.5918	0.360149	92.6125	73.8128
0.352754	27.0415	36.7059	0.881318	66.7518	86.118	0.322699	12.3099	5.10327	0.372604	74.2452	47.0283	0.177973	15.7769	10.9125	0.363812	91.8458	73.8091
0.352754	27.0415	36.7059	0.891688	66.7469	86.1034	0.322699	12.2773	5.77084	0.372604	73.6224	46.6904	0.177973	16.5422	10.9125	0.367408	91.8048	74.4514
0.356208	27.0404	36.7027	0.89514	66.7453	86.0985	0.322699	12.5324	5.77084	0.372604	73.6224	46.6904	0.18888	15.9893	11.5496	0.367408	92.1278	75.4203
0.356208	27.4311	37.1085	0.908969	66.7389	86.0792	0.322699	12.2773	5.77084	0.372604	73.1122	46.6904	0.18888	15.7755	10.9084	0.367408	91.6176	75.4203
0.359663	27.7004	37.9165	0.91588	66.7356	86.0693	0.322699	12.0548	5.10327	0.372604	72.3469	46.6904	0.18888	15.7755	10.9084	0.371071	91.724	75.7395
0.363117	27.6994	37.9133	0.922791	66.4769	86.0596	0.33792	12.8184	5.09833	0.383792	72.089	46.6821	0.18888	15.8824	11.229	0.374734	91.5753	76.0587
0.363117	27.6994	37.9133	0.933161	66.337	85.6399	0.341674	12.818	5.09712	0.387543	71.833	46.6793	0.18888	15.9893	11.5496	0.381993	91.6805	76.3742
0.366571	27.6983	37.9102	0.946983	66.586	85.6206	0.341674	12.5629	5.09712	0.391295	71.832	46.6765	0.18888	15.9893	11.5496	0.385655	90.4037	76.3704
0.373547	26.9	36.2814	0.953894	65.8021	84.801	0.345496	12.5625	5.09588	0.391295	71.832	46.6765	0.196129	15.9883	11.5468	0.389251	90.4024	76.3666
0.377001	26.899	36.2783	0.960811	65.7989	84.7914	0.345496	11.7972	5.09588	0.394979	71.576	46.6737	0.196129	15.7332	11.5468	0.389251	90.5101	76.6895
0.377001	26.899	36.2783	0.974633	65.5371	84.7721	0.345496	11.9085	5.42959	0.394979	71.6886	47.0116	0.196129	15.9883	11.5468	0.400173	90.5063	76.6782
0.38391	27.1673	37.0834	0.978092	65.2801	84.7674	0.353072	11.7964	5.09342	0.398731	70.9223	47.0088	0.196129	15.223	11.5468	0.400173	90.5063	76.6782
0.38391	27.3024	37.4886	0.985003	65.2769	84.7577	0.356895	11.9072	5.42585	0.406167	70.6654	47.0033	0.199787	15.2226	11.5454	0.403836	90.9355	77.9658
0.38391	27.4376	37.8943	0.998825	65.5402	85.5477	0.356895	11.9072	5.42585	0.409919	70.6644	47.0005	0.199787	15.2226	11.5454	0.407432	90.0214	78.2849
0.387365	27.4366	37.8911	1.00228	65.5386	85.543	0.356895	11.7633	5.75952	0.413603	70.6635	46.9977	0.203445	15.946	12.1852	0.411095	90.2353	78.9267
0.394274	27.7047	38.6956	1.00919	65.28	85.5334	0.360648	11.6517	5.42462	0.42479	70.6607	46.9894	0.203445	15.6909	12.1852	0.418354	89.9776	78.9189
0.394274	27.4345	37.8848	1.01956	65.2751	85.5187	0.372046	11.6504	5.42089	0.428542	70.6598	46.9866	0.207036	16.1593	12.8249	0.422017	90.0839	79.2379
0.401182	27.5675	38.284	1.02993	64.6247	85.0995	0.372046	11.428	4.75365	0.435978	70.4028	46.981	0.207036	16.2661	13.1455	0.425613	89.9351	79.5568
0.415	27.5633	38.2712	1.03339	64.6231	85.0948	0.379622	11.4272	4.75122	0.435978	69.6375	46.981	0.207036	16.011	13.1455	0.429275	89.5711	79.2301
0.415	27.6835	37.8658	1.04376	64.3629	85.0802	0.379622	11.1721	4.75122	0.435978	69.6375	46.981	0.207036	15.394	12.8249	0.429275	89.4236	79.5529
0.415	27.4281	37.8657	1.04722	64.7515	85.48	0.379622	11.5057	5.752	0.435978	69.1273	46.981	0.207036	15.2457	13.1455	0.429275	89.6388	80.1984
0.415	28.0741	38.2713	1.06104	64.3548	85.0559	0.39102	10.9942	5.74823	0.435978	69.0148	46.6433	0.207036	15.2457	13.1455	0.429275	89.3837	80.1984
0.415	28.3295	38.2713	1.06104	64.4897	85.4606	0.39102	10.9942	5.74823	0.435978	68.6171	46.981	0.214352	15.2447	13.1425	0.432938	88.8323	80.84
0.415	28.4645	38.6764	1.07832	63.9566	84.6276	0.398666	10.9934	5.7457	0.447166	68.3593	46.9727	0.221601	15.754	13.1397	0.440197	88.5745	80.8322
0.425364	27.8303	39.0722	1.07832	64.2262	85.4363	0.398666	10.9934	5.7457	0.447166	68.3593	46.9727	0.221601	15.8608	13.4602	0.440197	88.4269	81.1549
0.428885	27.9495	38.6636	1.09906	63.9469	84.5986	0.406241	10.9925	5.7432	0.450918	68.3282	47.6452	0.221601	16.1159	13.4602	0.440197	88.3194	80.8322
0.435794	27.8271	39.0626	1.10251	64.2149	85.4024	0.406241	11.2476	5.7432	0.450918	68.0731	47.6452	0.221601	16.0091	13.1397	0.447456	88.4243	81.147
0.439248	27.9611	39.4648	1.10942	64.0768	84.9883	0.41764	11.2464	5.73942	0.458353	68.0713	47.6396	0.221601	15.754	13.1397	0.454715	88.0191	81.4619
0.439248	28.2165	39.4648	1.11288	64.0752	84.9834	0.421393	10.9908	5.73818	0.465789	67.6718	47.9717	0.225193	16.1154	13.4587	0.458378	87.9378	82.7486
0.442702	28.2155	39.4616	1.1267	63.558	84.9641	0.421393	11.246	5.73818	0.469541	67.6708	47.9688	0.232509	16.1145	13.4558	0.458378	87.6827	82.7486
0.442702	28.4856	40.272	1.13362	63.5548	84.9545	0.425215	11.3239	6.73724	0.469541	67.3332	46.9559	0.232509	16.3696	13.4558	0.458378	87.4276	82.7486
0.446157	28.4845	40.2687	1.14398	63.5499	84.9399	0.429038	11.3234	6.73594	0.473225	67.0772	46.9532	0.232509	15.7111	13.7763	0.46204	87.4262	82.7446
0.449611	28.4834	40.2655	1.15781	63.6782	85.3248	0.429038	10.846	6.06908	0.473225	66.3119	46.9532	0.232509	15.8179	14.0967	0.465637	87.5324	83.0632
0.45652	28.2259	40.259	1.15781	63.4229	85.3248	0.432791	10.8456	6.06783	0.476977	66.0558	46.9504	0.232509	15.8179	14.0967	0.465637	87.5324	83.0632
0.470338	28.0864	39.8407	1.16472	63.4197	85.3152	0.436614	10.8452	6.06655	0.480729	66.0549	46.9476	0.232509	16.073	14.0967	0.480221	87.0169	83.0472
0.470338	28.2069	39.4358	1.182	63.5463	85.6949	0.436614	10.8452	6.06655	0.484412	66.054	46.9448	0.232509	16.1798	14.4172	0.480221	87.0169	83.0472
0.470338	28.3272	39.0305	1.19237	63.5414	85.6803	0.440367	10.9559	6.39869	0.484412	65.5438	46.9448	0.239758	16.072	14.0938	0.480221	86.6142	83.3698
0.470338	28.4622	39.4357	1.19928	63.0274	85.6707	0.440367	10.7008	6.39869	0.488164	65.5428	46.942	0.243416	15.8579	13.4514	0.480221	86.4666	83.6924
0.473793	28.4612	39.4325	1.20274	63.0258	85.6658	0.440367	10.9231	7.06547	0.491848	65.2868	46.9393	0.243416	16.1783	14.4127	0.480221	86.319	84.015
0.480702	28.594	39.8311	1.20619	63.1587	86.0647	0.455588	10.6991	6.39355	0.4956	65.2859	46.9365	0.243416	16.1783	14.4127	0.483817	86.3177	84.011
0.480702	28.9991	41.0464	1.20619	63.1587	86.0647	0.455588	9.67865	6.39355	0.499352	65.1724	46.5961	0.247007	16.2847	14.7317	0.48748	86.2088	83.6843
0.480702	28.7437	41.0464	1.22002	63.4076	86.0451	0.455588	9.56754	6.06021	0.51054	65.0572	46.2503	0.247007	16.3915	15.0521	0.494739	86.3136	83.9988
0.484222	28.6076	40.6381	1.22693	63.4044	86.0354	0.459411	9.82222	6.05893	0.514223	65.1688	46.5851	0.254256	16.4973	15.3695	0.498402	86.4198	84.3173
0.49804	28.6033	40.6251	1.24421	63.5308	86.4148	0.459411	10.0773	6.05893	0.51054	64.802	46.2503	0.257914	16.4968	15.368	0.505661	86.6321	84.9542
0.49804	28.6033	40.625	1.24767	63.0184	86.4099	0.466986	10.1876	6.3897	0.514223	64.1483	46.5851	0.257914	16.4968	15.368	0.505661	86.6321	84.9542
0.49804	28.6033	40.625	1.25458	63.0152	86.4002	0.474562	10.0756	6.05387	0.514223	64.2608	46.9226	0.257914	16.4968	15.368	0.509323	85.6103	84.9501
0.49804	28.8587	40.6251	1.26841	62.8741	85.9769	0.478385	10.2974	6.71912	0.517975	64.2598	46.9198	0.257914	16.2417	15.368	0.509323	85.6103	84.9501
0.504949	28.9915	41.0234	1.27532	62.8708	85.967	0.478385	10.2974	6.71912	0.525411	64.0029	46.9142	0.257914	16.4968	15.368	0.51292	85.609	84.9461
0.511858	29.1243	41.4219	1.28915	62.8643	85.9476	0.478385	10.0752	6.0526	0.529163	63.7468	46.9114	0.261572	15.986	15.3664	0.516582	85.46	85.2644
0.511858	29.2593	41.827	1.28915	62.5953	85.1407	0.482138	10.0748	6.05134	0.529163	63.7468	46.9114	0.261572	15.986	15.3664	0.520245	85.3511	84.9378
0.511858	29.2593	41.827	1.29951	62.8594	85.9329	0.489783	9.81884	6.04879	0.529163	63.2366	46.9114	0.268821	15.985	15.3634	0.520245	85.096	84.9378
0.518767	29.2571	41.8204	1.30643	62.5872	85.1164	0.489783	10.074	6.04879	0.536599	62.7246	46.9059	0.268821	15.985	15.3634	0.531167	85.3742	86.5378
0.522221	29.0006	41.817	1.30988	62.5857	85.1117	0.493536	10.0735	6.04753	0.540351	62.7237	46.9031	0.268821	15.985	15.3634	0.531167	85.3742	86.5378
0.522221	29.256	41.8171	1.32371	62.9825	86.3022	0.493536	10.0735	6.04753	0.555222	62.8324	47.2293	0.272479	16.2396	15.3618	0.534763	85.3729	86.5337
0.522221	28.7306	41.007	1.32716	62.9809	86.2975	0.493536	10.0735	6.04753	0.558974	62.8315	47.2265	0.272479	16.2396	15.3618	0.538426	85.2238	86.8519
0.52913	28.9984	41.8105	1.34444	62.704	85.4667	0.504935	10.1833	6.3769	0.558974	62.3213	47.2265	0.28332	16.3449	15.6776	0.552944	85.2183	86.8354
0.536039	29.2516	41.8038	1.35827	63.0872	85.8501	0.508757	9.96079	5.70929	0.558974	62.2088	46.8892	0.28332	16.3449	15.6776	0.552944	84.9632	86.8354
0.543015	29.2494	41.7972	1.35827	62.6975	85.4471	0.520156	10.4367	6.37177	0.558974	61.8412	46.5518	0.286978	16.3443	15.676	0.552944	84.5604	87.1577
0.543015	29.5048	41.7972	1.36863	62.6926	85.4325	0.523909	10.1812	6.3705	0.570162	61.8384	46.5435	0.286978	16.4511	15.9963	0.556606	84.559	87.1535
0.546469	29.6387	42.1988	1.379	62.6877	85.4178	0.531485	9.92523	6.36794	0.562658	61.3301	46.5491	0.286978	16.196	15.9963	0.560269	84.3025	87.1493
0.546469	29.6387	42.1988	1.38246	63.0758	85.816	0.531485	9.92523	6.36794	0.570162	61.3282	46.5435	0.286978	16.3028	16.3166	0.560269	84.3025	87.1493
0.549924	29.3822	42.1955	1.39283	62.9367	85.3985	0.531485	9.67012	6.36794	0.570162	60.818	46.5435	0.286978	16.3028	16.3166	0.563865	84.0862	86.5005
0.556833	29.7702	42.5935	1.40319	63.0661	85.7868	0.535307	9.41458	6.36665	0.577597	60.4486	46.2007	0.286978	16.3028	16.3166	0.567528	84.0848	86.4964
0.563741	29.768	42.5868	1.41011	63.0628	85.777	0.542883	9.41373	6.3641	0.577597	60.1935	46.2007	0.290636	16.3023	16.3151	0.571191	84.5132	87.7814
0.563741	29.4982	41.7774	1.41356	62.9402	86.1752	0.542883	9.41373	6.3641	0.577597	60.1935	46.2007	0.290636	16.3023	16.3151	0.574787	83.7867	87.1327
0.567196	29.3621	41.3691	1.42393	62.6799	86.1607	0.542883	9.41373	6.3641	0.585033	60.1917	46.1952	0.290636	16.9192	16.6353	0.57845	84.0002	87.7731
0.567196	29.4971	41.774	1.42739	61.6568	86.1558	0.542883	9.41373	6.3641	0.585033	59.9366	46.1952	0.290636	16.409	16.6353	0.582046	83.596	88.0912
0.57065	29.2406	41.7707	1.44812	61.7814	86.5295	0.542883	9.15862	6.3641	0.592469	60.1596	46.8642	0.294227	16.5984	15.6729	0.585709	83.5946	88.087
0.584468	29.2362	41.7575	1.45158	61.7797	86.5245	0.558104	9.0128	6.69196	0.599973	60.1577	46.8585	0.297885	16.7047	15.9917	0.589371	83.3381	88.0828
0.587923	29.37	42.159	1.45504	61.7781	86.5198	0.56568	9.01194	6.68938	0.603656	59.6466	46.8558	0.297885	16.5979	15.6714	0.589371	83.1904	88.405
0.587923	29.6254	42.159	1.46541	61.7731	86.5048	0.56568	9.26704	6.68938	0.603656	59.3915	46.8558	0.297885	16.0877	15.6714	0.589371	83.0428	88.7273
0.591377	29.6243	42.1557	1.47578	62.1448	86.0873	0.561857	9.01238	6.69068	0.603656	58.8812	46.8558	0.297885	16.1945	15.9917	0.603889	83.2922	88.7104
0.594832	29.6232	42.1523	1.49306	62.1366	86.0629	0.561857	9.01238	6.69068	0.607408	58.6555	46.1787	0.297885	16.408	16.6322	0.603889	83.6547	89.0326
0.594832	29.6232	42.1524	1.49306	61.8942	86.8681	0.561857	9.01238	6.69068	0.611092	59.0525	45.8388	0.301543	15.8972	16.6306	0.603889	83.3996	89.0326
0.594832	29.758	42.5568	1.50688	61.8877	86.8486	0.561857	9.01238	6.69068	0.611092	59.0525	45.8388	0.301543	15.8972	16.6306	0.603889	82.8894	89.0326
0.598286	29.8918	42.9583	1.51034	61.8861	86.8438	0.573255	9.01108	6.6868	0.62228	59.0497	45.8305	0.301543	16.004	16.9509	0.603889	82.6746	88.3882
0.598286	30.1615	43.7674	1.52417	61.8795	86.824	0.577078	9.12163	7.01843	0.62228	59.0497	45.8305	0.305134	15.8967	16.6291	0.611148	82.8866	89.0241
0.601807	30.1604	43.7639	1.53453	62.13	86.8093	0.588477	9.63053	7.01451	0.629784	58.7928	45.825	0.308792	16.4064	16.6275	0.614811	82.7778	88.6977
0.608716	30.1437	42.9481	1.53453	62.13	86.8092	0.59223	9.51914	6.68034	0.637219	58.0256	45.8195	0.308792	16.5547	16.3072	0.625733	82.7736	88.685
0.608716	30.2786	43.3528	1.54145	62.1268	86.7995	0.596052	9.5187	6.67903	0.644655	57.9934	46.4882	0.312384	16.7677	16.9461	0.625733	82.7332	89.3293
0.615625	30.2764	43.346	1.55181	62.1219	86.7848	0.599875	9.00806	6.67773	0.644655	57.9934	46.4882	0.312384	16.661	16.6259	0.625733	82.2229	89.3293
0.619079	29.7502	42.5334	1.56564	62.1153	86.7651	0.599875	9.00806	6.67773	0.652091	57.9096	45.4716	0.312384	16.6194	17.2664	0.625733	81.7531	88.685
0.622534	29.7491	42.5301	1.57255	62.112	86.7552	0.603628	9.00763	6.67645	0.652091	57.9096	45.4716	0.319699	16.725	17.5834	0.625733	82.0752	89.6514
0.625988	29.6132	42.1224	1.57601	61.9763	86.3481	0.607451	8.86303	7.00798	0.655843	57.6536	45.4688	0.326949	16.7239	17.5801	0.636654	82.326	89.6386
0.629443	29.6121	42.1191	1.58292	61.9731	86.3384	0.607451	8.60792	7.00798	0.655843	57.6536	45.4688	0.326949	15.9586	17.5801	0.636654	82.4334	89.9607
0.629443	29.6121	42.1191	1.6002	62.233	87.1182	0.607451	8.60792	7.00798	0.655843	57.1434	45.4688	0.326949	15.9586	17.5801	0.651172	82.4277	89.9437
0.632897	30.0155	43.3293	1.61057	62.2281	87.1035	0.611273	8.8626	7.00667	0.663279	56.7741	45.1264	0.330607	16.7885	18.539	0.651172	82.4277	89.9437
0.636352	30.0144	43.3259	1.61748	62.2248	87.0936	0.615026	8.60706	7.00538	0.670714	56.7723	45.121	0.330607	16.7885	18.539	0.654835	82.1712	89.9394
0.639806	29.7579	43.3226	1.61748	61.9694	87.0937	0.626425	8.86086	7.00146	0.674466	56.5163	45.1182	0.334198	17.043	18.5374	0.658498	81.7669	90.2571
0.653624	30.0088	43.3091	1.62785	62.354	87.4812	0.626425	8.86086	7.00146	0.678218	56.5154	45.1155	0.334198	16.7229	17.5769	0.665757	81.7641	90.2486
0.653624	29.8739	42.9046	1.63476	62.3506	87.4711	0.626425	8.86086	7.00146	0.678218	56.0357	44.4417	0.334198	16.8296	17.8971	0.669353	81.87	90.5663
0.653624	29.8739	42.9046	1.63476	62.3507	87.4712	0.626425	8.86086	7.00146	0.681902	56.0348	44.439	0.334198	16.5745	17.8971	0.669353	81.87	90.5663
0.653624	29.8739	42.9046	1.65204	62.3425	87.4467	0.637823	8.85955	6.99754	0.681902	55.7797	44.439	0.334198	16.5745	17.8971	0.669353	81.87	90.5663
0.653624	30.2783	44.1178	1.66241	62.3375	87.4318	0.637823	8.60444	6.99754	0.689406	56.0025	45.1073	0.334198	16.5745	17.8971	0.673015	81.7208	90.884
0.660599	30.2761	44.111	1.67623	62.3434	88.2156	0.641646	8.604	6.99622	0.696842	55.4905	45.1019	0.334198	16.4261	18.2172	0.676678	81.9744	90.8796
0.664054	30.4098	44.5121	1.67623	62.0755	87.4118	0.641646	8.604	6.99622	0.696842	55.4905	45.1019	0.341447	16.6801	18.214	0.676678	81.7193	90.8796
0.667508	30.5291	44.1042	1.67623	62.0755	87.4118	0.652975	8.3476	6.99233	0.696842	55.4905	45.1019	0.341447	16.8285	17.8938	0.683937	80.9511	90.871
0.670963	30.6628	44.5053	1.6866	62.0706	87.3972	0.652975	8.3476	6.99233	0.696842	55.4905	45.1019	0.348763	16.4239	18.2107	0.683937	80.9511	90.871
0.677872	30.7952	44.9025	1.70734	62.1946	87.7691	0.652975	8.3476	6.99233	0.700525	54.9793	45.0992	0.352354	16.9336	18.2091	0.6876	81.057	91.1886
0.677872	30.7952	44.9026	1.71079	61.6822	87.764	0.652975	8.3476	6.99233	0.700525	54.867	44.7624	0.352354	16.8269	17.889	0.691196	81.0556	91.1844
0.681326	30.5246	44.0907	1.72808	61.674	87.7394	0.652975	8.09249	6.99233	0.708029	54.8652	44.7569	0.356012	16.7846	18.5275	0.691196	81.0556	91.1844
0.68478	30.2682	44.0873	1.72808	61.674	87.7395	0.668196	8.09074	6.98709	0.711713	54.6397	44.0806	0.356012	16.7846	18.5275	0.691196	80.9078	91.5063
0.688235	30.267	44.0838	1.7419	61.6673	87.7195	0.675771	8.08987	6.98449	0.715465	54.1286	44.0779	0.356012	16.7846	18.5275	0.698455	80.3947	91.4976
0.688235	30.0116	44.0839	1.7419	62.0566	88.1213	0.675771	8.31161	7.64969	0.715465	54.1286	44.0779	0.35967	16.9975	19.166	0.698455	80.1396	91.4976
0.698598	30.0082	44.0737	1.75227	63.0732	88.1065	0.683347	8.31072	7.64704	0.719217	54.0155	43.7384	0.35967	16.7424	19.166	0.698455	80.1396	91.4976
0.702053	30.0071	44.0704	1.76264	63.0683	88.0916	0.683347	7.97815	6.64931	0.726653	53.7586	43.7331	0.356012	16.6362	18.8476	0.705781	80.1367	91.4889
0.705507	30.6515	44.4713	1.7661	63.0666	88.0865	0.68717	8.08857	6.98057	0.726653	53.5035	43.7331	0.356012	16.6362	18.8476	0.713039	80.1338	91.4803
0.712416	30.6492	44.4645	1.77646	62.5509	88.0718	0.694746	7.97685	6.64543	0.730336	53.2169	44.404	0.35967	16.6357	18.8459	0.713039	80.0265	91.1584
0.712416	30.6492	44.4644	1.78338	62.2921	88.0616	0.694746	7.97685	6.64543	0.734088	53.216	44.4013	0.363262	16.8902	18.8443	0.716702	80.2802	91.1541
0.712416	30.3796	43.6558	1.78338	62.6936	89.2663	0.694746	7.97685	6.64543	0.734088	53.216	44.4013	0.363262	17.1036	19.4844	0.716702	80.2802	91.1541
0.715937	30.9034	44.461	1.79029	62.0334	88.0519	0.702391	7.97598	6.64282	0.73784	52.96	44.3986	0.370511	17.1025	19.481	0.720298	80.2382	91.7935
0.715937	30.9034	44.4609	1.80066	61.7731	88.0368	0.709967	7.97512	6.64024	0.749028	53.0696	44.7272	0.370511	17.1025	19.481	0.727557	80.0874	92.1066
0.719391	30.6469	44.4576	1.82139	61.7632	88.0071	0.709967	7.72001	6.64024	0.749028	53.1818	45.0639	0.374169	16.8886	18.8393	0.734883	80.0845	92.0978
0.7263	30.6446	44.4508	1.82485	61.7615	88.0021	0.709967	7.72001	6.64024	0.756464	53.18	45.0584	0.370511	16.8891	18.841	0.738479	80.083	92.0935
0.736664	30.7758	44.8444	1.83522	61.7566	87.9872	0.71372	7.71959	6.63897	0.756464	52.9249	45.0584	0.374169	17.1437	18.8393	0.738479	79.8279	92.0935
0.736664	30.6412	44.4406	1.84213	61.7533	87.9773	0.71372	7.71959	6.63897	0.756464	52.9249	45.0584	0.374169	17.2503	19.1593	0.742142	79.9337	92.4109
0.736664	30.6412	44.4406	1.84904	62.2727	88.7698	0.717542	7.71916	6.63767	0.760147	52.3016	44.7191	0.381418	16.9941	19.156	0.745804	79.9323	92.4065
0.747027	30.6378	44.4304	1.86632	62.3981	89.1459	0.725118	7.7183	6.63509	0.767651	52.0753	44.0404	0.381418	16.9941	19.156	0.745804	79.9323	92.4065
0.747027	30.6378	44.4304	1.86978	62.2627	88.7397	0.728941	7.93948	7.29863	0.767651	52.0753	44.0404	0.381418	16.9941	19.156	0.745804	79.6772	92.4065
0.747027	30.6378	44.4303	1.87669	62.7702	88.7298	0.728941	7.17416	7.29863	0.767651	51.3099	44.0404	0.381418	16.9941	19.156	0.749401	79.6757	92.4022
0.747027	30.7724	44.8341	1.88014	62.7685	88.7247	0.728941	7.17416	7.29863	0.771335	51.309	44.0377	0.385076	16.9518	19.7943	0.753063	79.4192	92.3978
0.747027	30.9071	45.2383	1.8836	62.7669	88.7198	0.732763	7.71743	6.63248	0.771335	51.309	44.0377	0.388734	17.0579	20.1126	0.753063	79.4192	92.3978
0.753936	31.1741	46.0393	1.91125	62.4862	87.8778	0.744092	7.97125	6.62863	0.786275	51.3055	44.027	0.388734	17.0579	20.1126	0.763985	79.4148	92.3847
0.757391	31.173	46.036	1.91125	62.7535	88.6798	0.744092	7.97125	6.62863	0.789958	51.4168	44.3609	0.388734	17.0579	20.1126	0.763985	79.522	92.7064
0.757391	31.173	46.0359	1.92162	62.4931	88.6647	0.747915	7.97082	6.62733	0.789958	51.4168	44.3609	0.388734	16.7379	19.1526	0.763985	79.522	92.7064
0.771208	31.2892	45.6183	1.92853	62.4898	88.6547	0.747915	7.46061	6.62733	0.789958	50.9373	43.6878	0.388734	16.993	19.1526	0.771244	79.3712	93.0193
0.771208	31.2892	45.6183	1.93199	62.4882	88.6499	0.755491	7.45975	6.62475	0.789958	50.9373	43.6878	0.388734	16.993	19.1526	0.778503	79.3683	93.0105
0.771208	31.2892	45.6183	1.94236	62.2277	88.6348	0.766889	7.45846	6.62087	0.789958	50.8251	43.3513	0.388734	17.0997	19.4726	0.782166	79.3668	93.0061
0.771208	31.4238	46.0221	1.95618	62.221	88.6147	0.770712	7.56878	6.95185	0.812334	50.3096	43.3353	0.388734	16.8446	19.4726	0.785762	79.5798	93.645
0.778184	31.4215	46.0151	1.95964	62.2076	87.8083	0.774465	7.4576	6.61829	0.816086	50.0536	43.3326	0.388734	16.8446	19.4726	0.789425	79.3232	93.6406
0.792002	31.2961	46.4052	1.9631	62.206	87.8034	0.774465	7.7127	6.61829	0.816086	50.0536	43.3326	0.388734	16.0792	19.4726	0.793087	79.2145	93.3145
0.795456	31.2949	46.4017	1.97692	62.333	88.1843	0.778287	7.71226	6.61699	0.819769	49.7976	43.33	0.395983	16.1847	19.7892	0.800346	79.2116	93.3057
0.795456	31.4296	46.8057	1.98038	62.3313	88.1794	0.785863	7.7114	6.61441	0.819769	49.7976	43.33	0.40689	16.9484	19.7841	0.804009	78.955	93.3013
0.795456	31.4296	46.8057	2.00111	62.3214	88.1495	0.785863	7.7114	6.61441	0.827273	49.7959	43.3247	0.40689	16.9484	19.7841	0.804009	79.2101	93.3013
0.795456	31.685	46.8057	2.00111	62.4548	88.5498	0.785863	7.7114	6.61441	0.830957	49.5399	43.3221	0.410482	17.0545	20.1024	0.807605	79.2087	93.297
0.798911	31.6838	46.8022	2.00457	62.3314	88.9458	0.789686	6.86854	5.61645	0.830957	49.5399	43.3221	0.414139	16.9473	19.7807	0.811268	79.3144	93.6141
0.802365	31.4134	45.9909	2.00803	62.3297	88.9406	0.789686	7.20076	6.61311	0.827273	48.9184	42.9883	0.417797	16.9467	19.779	0.811268	78.8042	93.6141
0.805819	31.2777	45.5839	2.01839	62.5917	89.7267	0.797262	6.86771	5.61395	0.834709	48.6616	42.983	0.421389	17.4564	19.7774	0.814864	78.8027	93.6097
0.816183	31.4088	45.977	2.03567	62.5833	89.7015	0.797262	6.68968	6.61053	0.834709	48.6616	42.983	0.421389	17.4564	19.7774	0.814864	78.5476	93.6097
0.819637	30.8831	45.1662	2.04259	62.58	89.6915	0.801084	6.68925	6.60923	0.834709	48.6616	42.983	0.421389	17.4564	19.7774	0.82219	78.5447	93.6008
0.819637	31.1385	45.1662	2.05295	62.4415	89.2762	0.804837	6.68882	6.60795	0.845897	48.6589	42.9751	0.425047	17.5624	20.0955	0.82219	78.5447	93.6008
0.826546	31.4053	45.9666	2.05987	62.4381	89.266	0.80866	6.9435	6.60665	0.853332	49.1365	43.6424	0.425047	17.5624	20.0955	0.825786	78.1402	93.9179
0.823092	31.6619	45.9701	2.05987	62.3046	88.8655	0.80866	6.9435	6.60665	0.853332	49.1365	43.6424	0.425047	17.5624	20.0955	0.825786	78.3953	93.9179
0.826546	31.9161	45.9667	2.07715	61.9075	88.44	0.812483	6.94306	6.60535	0.853332	49.1365	43.6424	0.421389	17.2013	19.7774	0.84037	78.3894	93.9002
0.830067	31.9149	45.9631	2.08751	62.1578	88.4249	0.812483	6.61092	5.60892	0.868272	48.9087	42.9592	0.421389	16.1808	19.7774	0.843966	78.3879	93.8958
0.836976	31.6572	45.9562	2.09443	61.8992	88.415	0.827634	6.60925	5.60392	0.868272	48.7966	42.6229	0.421389	16.1808	19.7774	0.843966	78.1328	93.8958
0.84043	31.7907	46.3565	2.10134	62.2961	89.6058	0.827634	6.60925	5.60392	0.868272	48.5415	42.6229	0.421389	16.6911	19.7774	0.847629	78.4527	94.8556
0.843885	31.5205	45.546	2.11171	62.2911	89.5908	0.827634	6.35414	5.60392	0.871956	48.5407	42.6203	0.428638	16.6899	19.774	0.851292	78.4512	94.8511
0.854248	31.2616	45.5356	2.11862	62.543	89.5807	0.831457	6.83022	6.26681	0.875708	48.5398	42.6177	0.435954	16.7954	20.0904	0.854888	77.9141	93.2398
0.854248	31.786	46.3426	2.1359	62.5346	89.5554	0.83521	6.57469	6.26555	0.886895	48.5372	42.6098	0.435954	16.7954	20.0904	0.858551	77.9126	93.2353
0.857703	31.7849	46.3392	2.1359	62.2679	88.7553	0.842855	6.68451	6.59502	0.890579	48.5363	42.6072	0.435954	16.6469	20.4102	0.858551	77.9126	93.2353
0.857703	31.5159	45.5321	2.14281	62.2646	88.7453	0.846608	6.68408	6.59374	0.890579	48.5363	42.6072	0.443203	16.6457	20.4068	0.862214	77.9112	93.2309
0.857703	31.7849	46.3392	2.16009	62.2562	88.7202	0.850431	6.82809	6.26042	0.890579	48.026	42.6072	0.443203	16.6457	20.4068	0.86581	77.8279	94.512
0.861157	31.9183	46.7393	2.16009	62.5228	89.5201	0.850431	6.82809	6.26042	0.890579	47.0056	42.6072	0.443203	17.4111	20.4068	0.86581	77.8279	94.512
0.861157	31.6629	46.7394	2.16355	62.6545	89.9152	0.850431	6.82809	6.26042	0.890579	47.0056	42.6072	0.446861	17.559	20.0853	0.869473	77.8264	94.5075
0.868066	31.4052	46.7324	2.17738	62.6478	89.8951	0.858007	6.82724	6.25787	0.898083	47.0038	42.6019	0.450452	17.5584	20.0836	0.873069	77.7178	94.1818
0.874975	31.4028	46.7254	2.18774	62.6428	89.8799	0.858007	6.82724	6.25787	0.898083	47.0038	42.6019	0.450452	17.665	20.4034	0.88399	77.7134	94.1684
0.87843	31.388	45.9148	2.18774	62.6428	89.8799	0.861829	6.82681	6.25658	0.909203	47.2563	42.594	0.457702	17.6639	20.3999	0.887653	77.7119	94.164
0.881884	31.3868	45.9112	2.19466	62.5061	89.4698	0.861829	6.82681	6.25658	0.909203	47.2563	42.594	0.457702	17.1537	20.3999	0.887653	77.7119	94.164
0.888859	31.6399	45.9043	2.20848	62.4993	89.4496	0.865582	6.82639	6.25532	0.912954	47.0003	42.5914	0.461359	17.1531	20.3982	0.887653	77.4568	94.164
0.888859	31.6399	45.9043	2.22231	62.4926	89.4294	0.884626	6.82425	6.2489	0.916706	46.9994	42.5887	0.461359	16.898	20.3982	0.891316	77.5624	94.4808
0.888859	31.7744	46.3078	2.22231	62.6259	89.8294	0.884626	6.31403	6.2489	0.92039	46.4384	40.9056	0.457702	16.8986	20.3999	0.891316	77.8175	94.4808
0.892314	32.0422	47.1112	2.22922	62.6226	89.8193	0.888379	6.31361	6.24764	0.92039	46.4074	41.5778	0.457702	16.8986	20.3999	0.902171	77.8131	94.4675
0.899223	32.3089	47.9113	2.23268	62.6209	89.8143	0.892202	6.31318	6.24635	0.92039	46.4384	40.9056	0.461359	17.2178	21.3575	0.902171	77.558	94.4675
0.899223	32.3089	47.9113	2.25341	62.744	90.1835	0.892202	6.31318	6.24635	0.924142	46.4375	40.903	0.461359	17.2178	21.3575	0.905834	77.8116	94.463
0.899223	32.3089	47.9113	2.25687	62.6091	89.7788	0.892202	6.31318	6.24635	0.931578	46.4048	41.5701	0.461359	17.2178	21.3575	0.905834	77.8116	94.463
0.909586	31.902	46.6905	2.27069	63.1131	89.7586	0.899778	6.31233	6.2438	0.93533	46.1488	41.5674	0.461359	17.1112	21.0377	0.916755	78.0623	94.4497
0.913041	31.9008	46.687	2.28452	63.2396	90.1379	0.899778	6.31233	6.2438	0.939014	45.8929	41.5649	0.468609	17.3651	21.0342	0.916755	78.0623	94.4497
0.91995	31.6431	46.68	2.28797	62.9825	90.1329	0.9036	6.3119	6.24251	0.942766	45.6058	42.2343	0.468609	17.3651	21.0342	0.920418	78.1679	94.7664
0.91995	31.8985	46.6801	2.29834	62.722	90.1177	0.911176	6.56616	6.23996	0.946517	45.6049	42.2317	0.468609	17.2585	20.7145	0.920418	76.7442	95.0875
0.923404	31.8974	46.6766	2.31216	62.7153	90.0976	0.911176	6.56616	6.23996	0.946517	45.86	42.2317	0.465017	17.3657	21.036	0.920418	76.7442	95.0875
0.926858	32.0306	47.0762	2.31908	62.7119	90.0874	0.914999	6.48904	5.24327	0.950201	45.7472	41.8931	0.468609	17.3651	21.0342	0.920418	76.7442	95.0875
0.930313	32.2714	46.2662	2.32599	62.8417	90.4766	0.914999	6.48904	5.24327	0.961389	45.6326	41.5493	0.472267	16.7477	20.7128	0.927677	76.9964	95.0786
0.930313	32.2714	46.2662	2.3329	62.8383	90.4666	0.918752	5.97841	5.24205	0.961389	45.5206	41.2134	0.472267	17.1514	20.3931	0.942195	76.9904	95.0608
0.930313	32.5402	47.0726	2.33636	63.3474	90.4613	0.918752	5.86781	4.91026	0.965141	45.5197	41.2108	0.475924	17.2574	20.711	0.945858	77.244	95.0563
0.933767	32.6735	47.4726	2.33636	63.3474	90.4615	0.93015	5.61147	4.90657	0.968825	44.9278	40.2004	0.483174	17.2562	20.7076	0.945858	76.9889	95.0563
0.937222	32.6723	47.469	2.34673	63.3423	90.4462	0.93015	5.94322	5.90182	0.976329	44.671	40.1953	0.483174	16.9366	19.7486	0.949521	77.2425	95.0518
0.940676	32.1604	47.4656	2.36055	63.4686	90.8249	0.933973	5.61106	4.90534	0.976329	44.895	40.8671	0.483174	17.6179	21.0273	0.953117	77.2411	95.0474
0.944197	32.2936	47.8654	2.37092	63.2081	90.8096	0.933973	5.61106	4.90534	0.976329	44.6398	40.8671	0.483174	17.6179	21.0273	0.953117	77.027	94.4052
0.944197	32.8044	47.8653	2.37092	62.6974	90.8096	0.937726	6.05296	6.23102	0.976329	44.6398	40.8671	0.483174	16.8525	21.0273	0.953117	76.7719	94.4052
0.947652	32.2924	47.8618	2.37783	62.694	90.7995	0.945371	6.0521	6.22844	0.983764	44.6381	40.862	0.483174	16.8525	21.0273	0.953117	76.7719	94.4052
0.947652	32.2924	47.8618	2.40202	62.6821	90.7637	0.949124	6.45133	5.89549	0.983764	44.5261	40.5261	0.490423	16.8514	21.0238	0.956779	76.9434	95.685
0.961469	32.2877	47.8476	2.40548	62.6804	90.7586	0.9567	6.56105	6.22463	0.9912	44.5244	40.521	0.490423	16.8514	21.0238	0.960376	76.9419	95.6805
0.961469	32.2877	47.8476	2.40548	62.6804	90.7588	0.9567	6.45049	5.89297	0.994952	44.0133	40.5184	0.494081	16.8508	21.022	0.967701	76.6838	95.6715
0.964924	32.2865	47.8441	2.42276	62.8049	91.1322	0.960523	5.93985	5.89169	0.994952	44.0133	40.5184	0.494081	17.1704	21.981	0.97496	76.9359	95.6625
0.964924	32.8107	48.6503	2.42276	62.8049	91.1322	0.968098	5.68391	5.88917	0.998636	44.0125	40.5159	0.494081	17.4256	21.981	0.97496	76.9359	95.6625
0.964924	32.8107	48.6504	2.43659	62.2874	91.112	0.960523	5.68475	5.89169	1.00614	44.0108	40.5108	0.494081	17.1704	21.981	0.97496	76.9359	95.6625
0.964924	32.8107	48.6504	2.44696	62.4152	91.4955	0.968098	5.68391	5.88917	1.00614	44.0108	40.5108	0.494081	16.9153	21.981	0.97496	76.6808	95.6625
0.982196	32.5361	47.8265	2.45733	62.4101	91.4801	0.968098	5.68391	5.88917	1.00982	44.01	40.5083	0.497672	16.6596	21.9792	0.989478	76.6748	95.6446
0.982196	32.0253	47.8265	2.46424	63.0399	91.0712	0.975744	5.68306	5.88662	1.00982	42.8776	40.1725	0.497672	16.5531	21.6596	0.989478	76.4197	95.6446
0.985651	31.7687	47.823	2.47115	63.0364	91.0608	0.979497	5.57211	5.55378	1.01733	43.2117	41.1747	0.497672	16.4465	21.3399	0.996803	76.4167	95.6355
0.985651	32.0241	47.823	2.47461	63.0347	91.0558	0.979497	5.57211	5.55378	1.02476	42.9549	41.1695	0.50133	16.446	21.3382	0.996803	76.4167	95.6355
0.996014	32.5314	47.8124	2.49189	62.7709	91.0303	0.994718	5.57044	5.54876	1.02476	42.9549	41.1695	0.508579	17.1036	21.0151	0.996803	76.4167	95.6355
0.996014	32.1548	48.2152	2.4988	62.7676	91.0202	0.994718	5.57044	5.54876	1.02845	42.8734	40.1598	0.508579	17.5073	20.6955	0.996803	76.4167	95.6355
0.996014	31.8994	48.2152	2.50226	62.7658	91.015	0.990895	5.06064	5.55002	1.03595	43.1268	40.1546	0.508579	17.5073	20.6955	1.0004	76.4152	95.6311
1.00299	33.053	48.6112	2.50917	63.2834	91.8017	0.994718	5.57044	5.54876	1.03595	43.1268	40.1546	0.508579	17.5073	20.6955	1.0004	76.3083	95.3102
1.00299	32.5422	48.6112	2.52299	63.2766	91.7813	0.998471	5.57002	5.54752	1.03595	43.0149	39.8189	0.512237	17.7198	21.3329	1.00406	76.3067	95.3056
1.00644	32.0302	48.6076	2.5299	63.2731	91.771	0.998471	5.57002	5.54752	1.04714	43.0123	39.8113	0.508579	17.2102	21.3347	1.01132	76.0487	95.2967
1.0099	32.2844	48.604	2.54027	63.4008	92.154	1.00612	5.56918	5.545	1.05082	42.5013	39.8088	0.508579	16.955	21.3347	1.01132	76.0487	95.2967
1.01335	32.5387	48.6005	2.54027	63.4008	92.1541	1.00612	5.56918	5.545	1.05082	42.5013	39.8088	0.512237	16.6993	21.3329	1.01858	76.0457	95.2878
1.01681	32.5375	48.597	2.54718	63.2646	91.7454	1.00612	5.56918	5.545	1.05082	42.5013	39.8088	0.512237	16.5928	21.0133	1.02224	76.1099	96.2458
1.02372	32.7905	48.5899	2.56792	63.2543	91.7146	1.00987	5.56877	5.54376	1.05457	42.2454	39.8063	0.512237	16.5928	21.0133	1.0295	76.1069	96.2368
1.02372	32.9248	48.9928	2.57138	63.2525	91.7092	1.00987	5.56877	5.54376	1.05826	42.2445	39.8038	0.515829	16.8473	21.0116	1.0295	76.362	96.2368
1.02717	33.0579	49.392	2.58174	63.2474	91.6939	1.02127	5.56752	5.54	1.06201	41.3979	38.7944	0.526736	17.0586	21.6455	1.03316	76.1054	96.2322
1.02717	33.0579	49.3919	2.58866	63.7549	91.6838	1.02509	5.5671	5.53874	1.06576	41.9072	38.7919	0.526736	16.7391	20.6869	1.03683	76.2108	96.5485
1.03408	33.0555	49.3848	2.59557	63.2407	91.6736	1.03267	4.54582	5.53624	1.06576	41.5403	38.4563	0.526736	17.0586	21.6455	1.03683	76.2108	96.5485
1.03753	32.9201	48.9786	2.60248	62.9819	91.6632	1.02884	4.54624	5.5375	1.06945	41.3962	38.7894	0.526736	16.7391	20.6869	1.03683	75.89	95.5861
1.03753	33.1886	49.7842	2.6163	62.9751	91.6428	1.02884	4.54624	5.5375	1.06945	41.3962	38.7894	0.530394	16.7385	20.6851	1.03683	75.997	95.9069
1.04099	32.7846	48.572	2.61976	63.2287	91.6376	1.03267	4.80093	5.53624	1.06945	41.7632	39.125	0.530394	16.9936	20.6851	1.05135	75.991	95.8889
1.05135	32.7811	48.5615	2.63013	62.9582	90.8261	1.03649	4.94516	5.20358	1.08439	41.7598	39.115	0.534052	17.0996	21.0029	1.05501	75.9895	95.8844
1.05826	32.9129	48.9571	2.64396	62.9514	90.8057	1.04024	4.94475	5.20236	1.08807	41.1055	39.4481	0.537643	17.099	21.0012	1.0586	75.7329	95.8799
1.06178	32.9118	48.9536	2.64396	62.9514	90.8057	1.05164	5.19862	5.19864	1.09182	41.2479	39.11	0.541301	16.8011	21.6384	1.0586	75.9467	96.5214
1.06178	32.9118	48.9536	2.66124	63.0756	91.1783	1.05922	5.19779	5.19616	1.09182	41.2479	39.11	0.541301	16.8011	21.6384	1.06227	75.9039	97.1582
1.06524	33.0447	49.3524	2.66469	63.0838	91.969	1.06304	4.83183	4.86361	1.09926	41.2462	39.105	0.541301	17.0141	22.2774	1.06953	75.9008	97.1491
1.07215	33.1766	49.7482	2.67852	62.8215	91.9482	1.06304	4.94227	5.19491	1.10301	41.2454	39.1025	0.54855	17.2681	22.2738	1.07319	75.8993	97.1446
1.07215	33.432	49.7482	2.68889	62.8164	91.9329	1.06304	4.7214	4.5323	1.10301	40.9099	38.096	0.552208	17.3096	21.6331	1.07678	76.1529	97.1401
1.07215	33.432	49.7482	2.69926	62.9439	92.3153	1.07061	4.72059	4.52988	1.10301	40.6548	38.096	0.555799	17.8193	21.6314	1.08411	76.2981	96.8102
1.07215	33.432	49.7481	2.69926	62.9439	92.3154	1.07061	4.72059	4.52988	1.10676	40.654	38.0936	0.552208	17.9263	21.9526	1.08411	76.2981	96.8102
1.07905	33.2954	49.3382	2.69926	63.4546	92.3154	1.07061	4.94144	5.19244	1.10676	40.6225	38.7645	0.552208	17.8198	21.6331	1.08411	75.7879	96.8102
1.08251	33.5495	49.3346	2.70617	63.9619	92.305	1.07444	4.94103	5.19119	1.11795	40.62	38.757	0.559457	17.5636	21.6296	1.08411	75.7879	96.8102
1.08596	33.0376	49.331	2.72345	63.9533	92.2792	1.07444	4.94103	5.19119	1.11795	40.62	38.757	0.559457	17.67	21.949	1.08411	75.7879	96.8102
1.09287	32.7798	49.3238	2.72691	63.6962	92.2741	1.07819	4.94062	5.18997	1.12907	40.1073	38.7496	0.559457	17.0955	20.9907	1.09137	75.7849	96.8012
1.09978	32.6433	48.9143	2.74073	63.8121	91.8556	1.09341	5.27017	6.17861	1.12907	40.3309	39.4204	0.559457	17.0955	20.9907	1.09503	75.5281	96.7966
1.10324	32.6421	48.9107	2.74764	63.8184	92.6406	1.09723	5.26974	6.17732	1.13282	40.1065	38.7471	0.563115	17.4143	21.9472	1.09503	75.635	97.1172
1.10669	32.6409	48.9072	2.75801	63.8132	92.6249	1.09723	5.26974	6.17732	1.13657	39.9939	38.4092	0.566707	17.4138	21.9455	1.10229	74.8667	97.1081
1.10669	32.7621	48.5045	2.77529	63.8046	92.5991	1.10099	4.71735	4.52017	1.13657	39.9939	38.4092	0.566707	17.4138	21.9455	1.10229	75.0804	97.7493
1.10669	33.0175	48.5045	2.7822	63.8011	92.5888	1.10099	4.71735	4.52017	1.13657	39.9939	38.4092	0.566707	17.4138	21.9455	1.10955	75.0774	97.7402
1.11014	33.4188	49.7086	2.7822	63.8011	92.5888	1.10481	4.71695	4.51895	1.14776	39.9914	38.4018	0.566707	17.924	21.9455	1.10955	75.3739	97.0991
1.11014	33.1505	48.9037	2.78911	63.5423	92.5785	1.10856	4.46144	4.51775	1.15144	39.7355	38.3993	0.573956	17.4126	21.9419	1.11321	75.586	97.7356
1.11712	33.1481	48.8964	2.79948	63.0264	92.5629	1.11996	4.42585	5.17633	1.15144	39.7355	38.3993	0.573956	17.4126	21.9419	1.11321	75.4792	97.415
1.11712	33.4164	49.7013	2.80294	63.0247	92.5579	1.12378	4.42544	5.17508	1.15519	39.9582	39.0675	0.573956	17.1574	21.9419	1.11681	75.264	96.7694
1.12057	33.281	49.2951	2.82367	63.7805	92.5268	1.13136	4.42461	5.17261	1.15519	39.9582	39.0675	0.577614	17.1568	21.9402	1.12047	75.4761	97.4059
1.12748	33.2786	49.288	2.82367	63.79	93.3215	1.13518	4.67931	5.17136	1.16263	39.111	38.0566	0.581272	16.9011	21.9384	1.12413	75.4746	97.4013
1.12748	33.4128	49.6905	2.83404	63.9078	92.9087	1.13518	4.67931	5.17136	1.16263	39.111	38.0566	0.581272	17.1562	21.9384	1.13139	75.4716	97.3922
1.13094	33.4116	49.687	2.84095	64.0367	93.2955	1.14276	4.67848	5.16889	1.16638	39.1102	38.0541	0.581272	17.4114	21.9384	1.13865	75.2134	97.3831
1.13439	33.155	49.6834	2.84787	64.0333	93.2852	1.14276	3.91316	5.16889	1.16638	38.9985	37.7189	0.581272	17.4114	21.9384	1.13865	74.9169	98.024
1.14821	33.1502	49.669	2.84787	64.0333	93.2852	1.14658	3.91275	5.16764	1.16638	38.7434	37.7189	0.581272	17.4114	21.9384	1.14591	75.424	98.0149
1.15166	33.149	49.6654	2.86515	64.0246	93.2593	1.14276	3.91316	5.16889	1.17382	38.4866	37.714	0.584863	17.4108	21.9366	1.14591	74.5519	97.6944
1.15166	33.149	49.6654	2.87897	64.0176	93.2383	1.14658	4.31261	4.83661	1.18125	38.485	37.7091	0.588521	17.5167	22.2542	1.14591	74.4451	97.374
1.15166	33.149	49.6653	2.88243	64.016	93.2333	1.14658	4.56772	4.83661	1.18125	38.3733	37.3739	0.588521	17.2615	22.2542	1.14591	75.3172	97.6944
1.15512	33.4032	49.6617	2.88934	64.0125	93.2228	1.14658	4.56772	4.83661	1.18501	38.3724	37.3714	0.588521	17.5167	22.2542	1.15683	75.3126	97.6807
1.15857	33.6704	50.4632	2.88934	64.0125	93.2228	1.15033	4.56732	4.8354	1.19244	37.8606	37.3666	0.592179	17.2609	22.2524	1.15683	74.5473	97.6807
1.16203	33.4137	50.4595	2.91008	64.002	93.1915	1.15798	4.31139	4.83293	1.19988	37.859	37.3617	0.592179	17.2609	22.2524	1.1605	74.2907	97.6761
1.16548	33.4125	50.4559	2.91354	64.0004	93.1865	1.15798	4.31139	4.83293	1.20363	37.8582	37.3592	0.592179	17.2609	22.2524	1.1605	74.2907	97.6761
1.16894	33.5326	50.0498	2.93082	63.9917	93.1605	1.16555	3.80036	4.83048	1.20738	37.8574	37.3568	0.59577	17.1539	21.9313	1.1605	74.2907	97.6761
1.17591	33.5302	50.0426	2.93428	63.8668	93.552	1.16555	3.54525	4.83048	1.21106	37.7449	37.0193	0.599428	17.1533	21.9295	1.16775	74.2877	97.667
1.17937	33.3948	49.6366	2.94119	63.8633	93.5415	1.17313	3.54444	4.82804	1.21482	37.744	37.0168	0.603019	17.4078	21.9277	1.17501	74.9016	97.9782
1.17937	33.529	50.039	2.95156	64.1135	93.5258	1.17313	3.54444	4.82804	1.21482	37.744	37.0168	0.603019	17.4078	21.9277	1.17868	75.2619	98.2939
1.18282	33.2595	49.2305	2.95501	64.1117	93.5206	1.17313	3.79955	4.82804	1.21482	37.744	37.0168	0.610335	17.4067	21.9242	1.17868	75.0068	98.2939
1.18628	33.5266	50.0318	2.96192	64.2315	93.1136	1.18071	4.30894	4.82559	1.2185	37.7432	37.0144	0.603019	17.4078	21.9277	1.19319	74.894	97.9553
1.18628	33.2711	50.0317	2.96192	64.2315	93.1137	1.1921	4.30771	4.82191	1.2185	37.488	37.0144	0.610335	17.4067	21.9242	1.19319	74.894	97.9553
1.18628	33.1499	50.4341	2.98957	63.83	92.6754	1.19593	4.3073	4.82067	1.2185	37.488	37.0144	0.610335	17.4067	21.9242	1.19686	74.8924	97.9506
1.19664	33.0121	50.0209	2.99303	63.8283	92.6703	1.20733	4.41635	5.14781	1.2185	37.488	37.0144	0.610335	17.4067	21.9242	1.20052	74.1256	97.946
1.20009	33.0109	50.0173	3.0034	63.8231	92.6546	1.20733	4.05096	4.81699	1.22225	37.4872	37.012	0.606677	17.5559	21.6067	1.20412	74.8894	97.9415
1.20009	33.0109	50.0172	3.00685	63.8213	92.6494	1.21108	4.05056	4.81578	1.23344	36.8947	35.9996	0.613927	17.5548	21.6032	1.20412	75.1445	97.9415
1.20009	33.777	50.0173	3.02068	63.8144	92.6287	1.21108	4.05056	4.81578	1.24463	37.4824	36.9974	0.617584	17.5542	21.6014	1.20778	75.1429	97.9369
1.20009	34.0324	50.0173	3.02413	63.9449	93.0201	1.21108	3.83002	4.15416	1.24463	37.2273	36.9974	0.621242	17.7664	22.2381	1.20778	75.1013	98.5774
1.20355	33.7758	50.0137	3.03796	64.2022	93.792	1.21108	4.08513	4.15416	1.24463	37.4824	36.9974	0.621242	17.9792	22.8765	1.20778	74.8878	97.9369
1.21391	33.9063	50.4051	3.04141	63.8219	94.1833	1.21872	4.19459	4.48253	1.24463	37.1156	36.6624	0.624834	17.7235	22.8748	1.21504	74.8848	97.9277
1.21737	32.8836	50.4015	3.04832	63.8185	94.1729	1.22248	4.30444	4.8121	1.25206	37.3691	36.6576	0.624834	17.4684	22.8748	1.2223	74.8817	97.9185
1.21737	32.8836	50.4015	3.05869	64.3239	94.1572	1.2263	4.44889	4.4801	1.25206	36.8589	36.6576	0.624834	17.4684	22.8748	1.2223	74.8817	97.9185
1.22773	33.148	51.1946	3.06215	64.3221	94.1517	1.2263	4.55914	4.81086	1.25582	37.0333	35.6503	0.632083	17.7223	22.8711	1.2223	74.8817	97.9185
1.22773	32.88	50.3906	3.0656	64.3204	94.1466	1.23388	4.04811	4.80842	1.267	36.6006	36.6479	0.632083	17.6159	22.5519	1.2223	74.6683	97.2782
1.23118	33.0001	49.9848	3.08289	64.3117	94.1205	1.2377	4.04769	4.80718	1.267	36.6006	36.6479	0.632083	17.3608	22.5519	1.2223	74.4132	97.2782
1.24161	33.2519	49.9739	3.0898	64.0528	94.1101	1.24145	3.79219	4.80597	1.27069	36.4881	36.3106	0.632083	17.5736	23.1903	1.22962	74.4101	97.269
1.24507	33.372	49.5682	3.10017	64.1795	94.4902	1.2491	3.5016	5.46486	1.28187	36.4857	36.3034	0.632083	17.3608	22.5519	1.23322	74.4086	97.2644
1.24507	33.372	49.5682	3.10708	64.0441	94.0838	1.2491	4.01182	5.46486	1.28187	36.4539	36.9732	0.628492	17.4678	22.8729	1.23322	74.622	97.9048
1.24507	33.372	49.5682	3.11054	64.0423	94.0786	1.25285	4.04606	4.80229	1.28187	36.2306	36.3034	0.632083	17.5736	23.1903	1.2514	74.7211	98.202
1.24507	33.5061	49.9703	3.12436	64.5461	94.0575	1.2491	3.79137	4.8035	1.28931	36.1174	35.9638	0.635741	17.6793	23.5077	1.25506	74.7195	98.1973
1.24507	33.5061	49.9703	3.13128	64.6746	94.443	1.25285	3.28074	4.80229	1.29306	36.1166	35.9614	0.639399	17.4659	22.8675	1.25506	74.7195	98.1973
1.25543	33.6365	50.3616	3.14165	64.6693	94.4271	1.25285	3.68074	4.47162	1.29306	36.1166	35.9614	0.639399	17.4659	22.8675	1.25506	74.4644	98.1973
1.25889	33.6353	50.3579	3.14856	64.5425	94.8128	1.25667	3.68033	4.4704	1.29681	36.1158	35.959	0.64299	17.4654	22.8657	1.25872	73.9527	98.1927
1.26234	33.5001	49.9523	3.15893	64.7926	94.797	1.25667	3.42522	4.4704	1.30425	35.7475	35.6194	0.650306	17.4641	22.8621	1.25872	74.0594	98.5128
1.26579	33.4988	49.9486	3.15893	64.7926	94.797	1.27182	3.67872	4.46555	1.30425	35.4924	35.6194	0.653897	17.4635	22.8603	1.25872	73.9527	98.1927
1.26579	33.7667	50.7523	3.16584	64.4017	94.3904	1.27182	3.67872	4.46555	1.30793	35.4917	35.6171	0.653897	17.4635	22.8603	1.26598	73.9496	98.1835
1.26579	33.7542	49.9487	3.19003	64.6448	94.3536	1.28322	3.42239	4.46191	1.30793	35.4917	35.6171	0.657555	17.4629	22.8585	1.26598	73.9496	98.1835
1.26579	34.2775	50.7524	3.19694	64.8967	94.3431	1.28704	3.42199	4.46069	1.30793	34.9495	36.2866	0.657555	17.3566	22.5393	1.27324	74.4568	98.1743
1.27616	34.2738	50.7414	3.2004	64.6396	94.3379	1.2908	3.6767	4.45949	1.30793	34.9495	36.2866	0.657555	17.3566	22.5393	1.27324	74.4568	98.1743
1.27961	34.0172	50.7378	3.20731	64.6361	94.3274	1.29462	3.67629	4.45827	1.31544	34.6132	35.2775	0.657555	17.3566	22.5393	1.2769	74.4552	98.1697
1.27961	33.7494	49.9343	3.21768	65.1416	94.3117	1.29462	3.67629	4.45827	1.31912	35.1226	35.2752	0.661147	17.6111	22.5376	1.2805	74.3053	98.4852
1.2935	33.7445	49.9197	3.22459	65.27	94.6968	1.2908	3.6767	4.45949	1.32663	35.2326	35.6052	0.657555	17.3566	22.5393	1.29509	74.2991	98.4667
1.2935	33.4892	49.9197	3.22459	65.27	94.6969	1.29462	3.02114	4.7888	1.33031	35.2318	35.6028	0.661147	17.356	22.5376	1.29509	74.2991	98.4667
1.2935	33.4892	49.9197	3.23496	65.2648	94.6811	1.29844	2.91055	4.45705	1.33406	35.231	35.6004	0.664804	17.3554	22.5358	1.29509	74.2991	98.4667
1.29695	33.488	49.9161	3.24533	65.3914	95.061	1.29844	2.91055	4.45705	1.33774	35.1983	36.2675	0.664804	17.6105	22.5358	1.29509	74.5124	99.1066
1.30041	33.6208	50.3144	3.25915	65.1372	95.8308	1.30602	3.41997	4.45463	1.33406	35.199	36.2698	0.664804	17.972	22.8548	1.3096	74.293	98.4483
1.30041	34.0099	50.7159	3.26606	65.1337	95.8202	1.31359	3.41916	4.45221	1.33774	34.9751	35.5981	0.668462	17.9714	22.853	1.3096	74.5063	99.0881
1.30041	34.0099	50.716	3.26952	65.1319	95.815	1.32117	3.41835	4.44979	1.33774	34.8636	35.2634	0.668462	17.9714	22.853	1.31327	74.5047	99.0834
1.31077	34.1402	51.1069	3.2868	65.2548	96.1836	1.32499	3.3078	4.11814	1.35268	34.7169	35.5886	0.672054	17.4605	22.8512	1.31327	74.2914	98.4436
1.31422	34.2729	51.505	3.29371	64.6087	95.7778	1.32882	3.3074	4.11693	1.35268	34.7169	35.5886	0.672054	17.4605	22.8512	1.31327	73.7812	98.4436
1.31422	34.273	51.5051	3.30408	64.4716	95.3664	1.33257	3.307	4.11574	1.35268	34.7169	35.5886	0.675712	16.9497	22.8494	1.31327	73.7812	98.4436
1.32113	34.0152	51.4977	3.31099	64.4681	95.3558	1.33257	3.81721	4.11574	1.35644	34.684	36.2554	0.67937	16.9491	22.8476	1.32052	73.7782	98.4344
1.32459	33.7586	51.4941	3.3179	64.4645	95.3451	1.33257	3.81721	4.11574	1.36012	34.6832	36.253	0.682961	17.4587	22.8458	1.32419	74.0317	98.4298
1.33495	34.0103	51.4831	3.32827	65.2254	95.3293	1.33639	3.3066	4.11454	1.36012	33.5832	35.2492	0.682961	17.4587	22.8458	1.32419	74.0317	98.4298
1.33495	33.7549	51.4831	3.3421	65.2184	95.3081	1.33639	3.3066	4.11454	1.36387	33.4709	34.9122	0.682961	16.9485	22.8458	1.32419	74.2868	98.4298
1.33495	33.7549	51.483	3.34901	65.2148	95.2975	1.35154	3.41512	4.44008	1.36387	33.4709	34.9122	0.686619	17.4581	22.844	1.32785	74.2853	98.4252
1.33495	33.7549	51.4831	3.35247	64.818	94.1069	1.35537	3.41471	4.43886	1.37131	33.4693	34.9075	0.686619	17.4581	22.844	1.34237	74.2792	98.4068
1.34531	34.1281	51.0705	3.35938	64.8145	94.0965	1.35537	3.41471	4.43886	1.37874	33.7229	34.9029	0.686619	17.6708	23.482	1.33511	74.0271	98.416
1.35229	33.6149	51.0631	3.36975	65.2042	95.2657	1.35919	3.52441	4.76795	1.3825	33.7221	34.9005	0.686619	17.1606	23.482	1.34603	74.0225	98.4021
1.35229	33.6149	51.063	3.37666	65.2008	95.2553	1.35919	3.52441	4.76795	1.38993	33.7205	34.8958	0.690277	17.6702	23.4802	1.34963	74.021	98.3976
1.35229	33.6149	51.0631	3.38012	64.9436	95.2499	1.35919	3.4143	4.43764	1.38993	33.832	35.2303	0.690277	17.0536	23.1612	1.35695	74.0179	98.3883
1.35229	34.0042	51.4647	3.38703	64.4293	95.2394	1.37059	3.41309	4.434	1.39368	33.321	35.2279	0.690277	17.5638	23.1612	1.35695	74.0179	98.3883
1.3592	33.7464	51.4574	3.40431	64.4204	95.2129	1.37059	3.26807	4.76428	1.39737	32.9537	34.8911	0.690277	17.0536	23.1612	1.35695	74.0179	98.3883
1.36265	33.7451	51.4537	3.41123	64.4169	95.2022	1.36676	3.04829	4.10493	1.40487	32.8406	34.5519	0.693868	17.053	23.1594	1.35695	74.1245	98.708
1.36956	33.7427	51.4464	3.42159	65.1857	95.9764	1.37816	3.04709	4.10133	1.40487	32.8406	34.5519	0.701117	17.0518	23.1557	1.35695	74.0179	98.3883
1.37302	33.7415	51.4427	3.42851	65.1822	95.9658	1.37816	3.04709	4.10133	1.40487	32.8406	34.5519	0.704775	17.4551	22.8349	1.36421	74.1214	98.6988
1.37302	33.7415	51.4427	3.43887	65.1769	95.9498	1.37816	2.28176	4.10133	1.40855	32.9835	34.2152	0.704775	17.5614	23.1539	1.37513	74.1168	98.6849
1.37302	33.9969	51.4427	3.44579	65.1733	95.9391	1.38192	2.28137	4.10015	1.41606	33.1255	33.8761	0.704775	17.4551	22.8349	1.37873	74.2218	99
1.37302	33.9969	51.4427	3.46307	65.4198	95.9125	1.38956	2.93582	3.76752	1.40855	32.872	33.8807	0.704775	17.8166	23.1539	1.38239	74.4334	99.6347
1.37992	34.5051	51.4354	3.46307	65.2882	95.5176	1.40096	3.04469	4.09413	1.41606	32.9819	34.2105	0.708433	17.9647	22.8331	1.38239	74.4334	99.6347
1.39029	34.5015	51.4244	3.48035	65.411	95.8859	1.40471	3.04429	4.09294	1.41606	32.9819	34.2105	0.712024	17.8154	23.1503	1.38239	73.9232	99.6347
1.39029	34.5015	51.4244	3.48035	65.6663	95.8858	1.40853	3.04389	4.09173	1.41606	32.7268	34.2105	0.71934	17.8141	23.1466	1.38239	73.9232	99.6347
1.39029	34.8906	51.8256	3.48726	65.4074	95.8752	1.40853	3.04389	4.09173	1.41974	32.726	34.2082	0.71934	18.0692	23.1466	1.38605	73.3468	98.671
1.39029	34.8906	51.8256	3.49071	65.6611	95.87	1.40471	3.04429	4.09294	1.42349	32.6138	33.8715	0.71934	18.0692	23.1466	1.38605	73.0916	98.671
1.39374	34.3786	51.822	3.50799	65.9075	95.8435	1.40853	3.04389	4.09173	1.42349	32.3587	33.8715	0.71934	17.559	23.1466	1.38965	73.6004	98.6665
1.40411	34.3749	51.8109	3.51491	65.9039	95.8327	1.40853	3.00888	4.75203	1.42718	32.3579	33.8692	0.71934	17.6653	23.4655	1.39331	73.7054	98.9815
1.41108	34.3724	51.8035	3.52527	66.03	96.2108	1.41611	3.26317	4.74958	1.43468	32.3564	33.8645	0.71934	17.8141	23.1466	1.40424	73.7008	98.9676
1.41108	34.3724	51.8035	3.53219	65.8951	95.8062	1.42369	3.26236	4.74714	1.44955	32.3533	33.8553	0.71934	17.6653	23.4655	1.41149	73.6977	98.9583
1.41454	35.1374	51.7998	3.54255	65.8898	95.7902	1.42369	3.26236	4.74714	1.44955	32.6084	33.8553	0.71934	17.6653	23.4655	1.41516	74.4614	98.9536
1.41454	35.1374	51.7997	3.54947	66.0176	96.1736	1.42751	3.04189	4.08574	1.45331	33.1178	33.853	0.71934	17.6653	23.4655	1.41516	73.6961	98.9536
1.41799	35.1362	51.7961	3.55638	65.2479	96.1629	1.42751	3.04189	4.08574	1.45699	32.6069	33.8507	0.71934	17.6653	23.4655	1.41516	73.5896	98.6341
1.42144	34.612	50.9899	3.56675	65.2426	96.147	1.43891	3.18579	3.75209	1.45699	32.6069	33.8507	0.722932	17.6647	23.4637	1.41875	73.5881	98.6295
1.42144	34.6242	51.7925	3.57712	65.2373	96.1311	1.44266	3.1854	3.75092	1.45699	32.4954	33.5164	0.733839	17.8754	24.096	1.42601	74.3503	98.6203
1.43181	34.4868	51.3804	3.58403	65.2337	96.1204	1.43891	2.93068	3.75209	1.45699	32.2403	33.5164	0.733839	17.8754	24.096	1.41875	73.5881	98.6295
1.43526	34.6193	51.7778	3.59094	65.2301	96.1096	1.44266	2.56516	3.42088	1.46449	31.9837	33.5118	0.741088	17.8742	24.0923	1.42601	73.6915	98.9398
1.43872	34.4843	51.373	3.60131	65.2249	96.0938	1.44266	2.56516	3.42088	1.47193	31.8708	33.173	0.741088	17.8742	24.0923	1.42968	73.4349	98.9352
1.44217	34.4831	51.3694	3.60823	65.2212	96.0829	1.44648	2.05455	3.4197	1.47936	31.8692	33.1684	0.748404	17.6604	23.4509	1.43334	73.1781	98.9305
1.44217	34.4831	51.3693	3.61514	65.4805	96.8607	1.44648	2.05455	3.4197	1.48312	32.1236	33.1661	0.748404	17.6604	23.4509	1.43334	73.1781	98.9305
1.44563	34.4819	51.3657	3.63588	65.2071	96.0404	1.4617	2.30809	3.41499	1.4943	32.3764	33.1593	0.748404	17.6604	23.4509	1.44426	73.4287	98.9166
1.45253	34.4795	51.3584	3.63588	65.3384	96.4344	1.4617	2.41808	3.74496	1.4943	32.3764	33.1593	0.751995	17.6598	23.4491	1.45511	73.1689	98.9027
1.45944	34.3553	51.752	3.63933	65.4607	96.035	1.46546	2.92791	3.74379	1.4943	32.3764	33.1593	0.748404	17.5116	23.7697	1.45511	73.4241	98.9027
1.45944	34.489	52.1532	3.66007	65.45	96.003	1.47686	2.92672	3.74023	1.49799	32.1205	33.157	0.748404	17.5116	23.7697	1.45878	73.4225	98.8981
1.45944	34.489	52.1532	3.66698	65.4465	95.9924	1.47686	2.92672	3.74023	1.50174	32.0084	32.8206	0.748404	17.5116	23.7697	1.45878	73.4225	98.8981
1.45944	34.489	52.1533	3.67044	65.5689	95.5934	1.47686	2.92672	3.74023	1.50918	31.8631	33.1501	0.751995	18.0212	23.7679	1.46604	73.7167	98.25
1.46642	34.4865	52.1458	3.67735	65.5653	95.5828	1.47686	2.92672	3.74023	1.50918	31.8631	33.1501	0.751995	17.915	23.4491	1.4697	73.7152	98.2454
1.46642	34.7539	52.9479	3.68426	65.5618	95.5721	1.48825	2.92553	3.73666	1.51661	32.1167	33.1456	0.755653	17.9143	23.4472	1.4697	73.205	98.2454
1.47678	34.7502	52.9368	3.69463	65.3082	96.3437	1.48825	2.67042	3.73666	1.51661	31.8616	33.1456	0.759244	18.1688	23.4454	1.4697	73.205	98.2454
1.47678	34.4949	52.9368	3.70154	65.0492	96.3329	1.49583	2.70484	3.07459	1.51661	31.3514	33.1456	0.759244	17.9137	23.4454	1.4697	73.4179	98.8842
1.47678	34.4949	52.9368	3.70845	65.0456	96.3221	1.49208	2.70522	3.07573	1.52036	31.3507	33.1433	0.759244	18.4239	23.4454	1.47336	73.5228	99.1989
1.47678	34.4949	52.9367	3.71882	65.2957	96.3062	1.49583	2.44973	3.07459	1.52411	31.3499	33.141	0.759244	17.7648	23.7642	1.48062	73.5197	99.1896
1.48369	34.3588	52.5285	3.72573	65.2922	96.2957	1.50341	2.33902	2.74244	1.52411	30.9834	32.8069	0.759244	17.9563	22.8078	1.48422	73.263	99.185
1.49405	34.2214	52.1163	3.73956	65.8026	97.0609	1.50341	2.5589	3.4021	1.52411	30.9834	32.8069	0.762902	17.9557	22.806	1.48422	73.263	99.185
1.49405	34.4767	52.1163	3.74992	65.7973	97.0449	1.50341	2.30379	3.4021	1.5353	31.4914	32.8001	0.76656	18.2739	23.7605	1.49514	73.2583	99.1711
1.49405	34.6104	52.5174	3.75338	65.6645	96.6464	1.50723	2.3034	3.40092	1.53155	31.4921	32.8024	0.770152	18.0182	23.7587	1.4988	73.2568	99.1664
1.50096	34.6079	52.5099	3.76029	65.7919	97.0288	1.50723	2.55851	3.40092	1.5353	30.9812	32.8001	0.770152	17.6994	22.8024	1.50246	73.2552	99.1617
1.50442	34.6067	52.5063	3.7672	65.6573	96.6249	1.53003	2.55616	3.39387	1.53899	31.2355	32.7979	0.770152	18.0182	23.7587	1.50246	73.2552	99.1617
1.50442	34.6067	52.5063	3.77066	65.6555	96.6196	1.53003	2.55616	3.39387	1.54274	30.7246	32.7956	0.77381	18.0175	23.7568	1.50246	73.0001	99.1617
1.51133	34.6042	52.4988	3.78794	66.1573	96.5927	1.53003	2.55616	3.39387	1.55393	30.7223	32.7888	0.77381	18.0175	23.7568	1.50972	73.2521	99.1525
1.51478	34.603	52.4951	3.79485	66.0294	96.9751	1.53003	2.30105	3.39387	1.55393	30.4672	32.7888	0.781059	18.0163	23.7531	1.50972	72.997	99.1525
1.51824	34.5898	51.6895	3.80522	66.0241	96.959	1.53003	2.52088	4.05335	1.55761	31.2317	32.7865	0.781059	17.7612	23.7531	1.50972	72.997	99.1525
1.51824	34.2008	51.2887	3.80522	66.0241	96.9591	1.5376	2.30027	3.39153	1.56511	30.4649	32.7819	0.781059	17.7612	23.7531	1.52064	72.9924	99.1385
1.51824	34.6017	52.4914	3.82251	66.0151	96.9322	1.5376	2.30027	3.39153	1.5688	30.3529	32.4458	0.77381	17.7624	23.7568	1.52064	72.9924	99.1385
1.52176	34.6005	52.4876	3.82942	66.2738	97.7081	1.5376	2.08046	2.7321	1.57255	30.3521	32.4435	0.77381	17.7624	23.7568	1.52064	72.5886	99.4577
1.52521	34.5993	52.484	3.83979	65.8818	97.2984	1.54518	1.82459	2.7298	1.57255	30.2408	32.1096	0.77381	17.7624	23.7568	1.52064	72.5886	99.4577
1.52867	34.7316	52.881	3.8467	66.1337	97.2879	1.549	1.8242	2.72865	1.57255	30.097	32.4435	0.777467	17.7618	23.7549	1.5279	72.5855	99.4484
1.53212	34.7303	52.8772	3.86053	65.8711	97.2662	1.55282	2.04359	3.38682	1.57255	29.9857	32.1096	0.781059	17.7612	23.7531	1.53516	73.3054	100.078
1.53557	34.7291	52.8735	3.86398	66.1313	98.047	1.56415	2.04243	3.38332	1.57255	29.7305	32.1096	0.788308	17.8662	24.0681	1.54242	73.3023	100.068
1.53903	35.2387	52.8698	3.87089	65.6104	97.2503	1.56415	2.04243	3.38332	1.58374	29.8395	32.4367	0.788308	17.8662	24.0681	1.54608	73.3007	100.063
1.54248	35.4928	52.866	3.87089	66.2522	97.6433	1.56797	2.1519	3.71175	1.59117	29.838	32.4322	0.791966	18.1207	24.0663	1.54975	73.2991	100.059
1.54939	35.2349	52.8586	3.89163	66.2413	97.6107	1.5718	2.40661	3.71056	1.59117	29.9493	32.7661	0.791966	17.802	23.1102	1.54975	73.0864	99.4205
1.55285	35.2337	52.8549	3.902	66.2359	97.5946	1.5718	2.29675	3.38096	1.59117	29.9493	32.7661	0.795624	18.3752	24.0644	1.54975	73.0864	99.4205
1.55285	35.2337	52.8549	3.90545	66.7448	97.5892	1.5718	2.29675	3.38096	1.59492	29.3922	31.0947	0.799215	18.0559	23.1066	1.55334	73.5951	99.4159
1.55976	35.2312	52.8474	3.90891	66.743	97.5838	1.57555	2.29636	3.3798	1.59861	29.3915	31.0925	0.799215	18.2683	23.7439	1.55334	73.0848	99.4159
1.55976	34.9758	52.8474	3.92273	66.7358	97.5622	1.58695	2.29518	3.37627	1.60236	29.2469	31.4241	0.802873	18.2677	23.7421	1.57152	73.0771	99.3926
1.57012	34.9721	52.8362	3.92273	66.7358	97.5622	1.59077	2.18494	3.04555	1.60236	28.9918	31.4241	0.806531	18.2671	23.7402	1.57152	73.1834	99.7117
1.57012	34.8386	52.4358	3.94347	66.2143	97.5297	1.59077	2.18494	3.04555	1.60604	28.9911	31.4219	0.806531	18.012	23.7402	1.57152	73.1834	99.7117
1.57012	34.8386	52.4358	3.95038	66.2108	97.5191	1.59077	2.18494	3.04555	1.61355	28.9896	31.4174	0.806531	17.2466	23.7402	1.57152	73.0771	99.3926
1.57012	35.3494	52.4358	3.95038	65.9489	96.7335	1.59835	2.18417	3.04324	1.62474	28.9873	31.4107	0.806531	17.2466	23.7402	1.57152	73.0771	99.3926
1.58055	35.3457	52.4246	3.97457	66.329	97.8738	1.59835	2.18417	3.04324	1.62474	28.9873	31.4107	0.806531	18.012	23.7402	1.57885	73.2866	100.021
1.58055	35.3457	52.4246	3.97803	65.9345	96.6904	1.59835	2.18417	3.04324	1.62474	28.9873	31.4107	0.810122	17.246	23.7384	1.58611	73.0708	99.3739
1.58746	35.0878	52.4173	3.9884	66.1845	96.6744	1.61357	2.18262	3.03859	1.62474	28.9873	31.4107	0.81378	17.2454	23.7365	1.58611	73.0708	99.3739
1.59091	34.6976	52.0128	3.99877	66.5654	97.0508	1.61732	2.03695	3.36689	1.62474	28.9873	31.4107	0.81378	17.2454	23.7365	1.58977	73.0693	99.3693
1.59091	34.6976	52.0128	4.00222	66.8253	97.8305	1.62114	2.14637	3.69514	1.62842	28.9866	31.4085	0.817372	17.8612	24.0533	1.58977	72.8142	99.3693
1.59437	34.6964	52.0091	4.01259	66.5582	97.0294	1.6249	2.40108	3.69397	1.63217	28.9859	31.4063	0.817372	17.351	24.0533	1.59337	72.8126	99.3646
1.59782	34.9622	52.8065	4.02642	66.8127	97.7927	1.62872	2.40068	3.69277	1.64336	28.9836	31.3996	0.82103	17.8606	24.0514	1.60063	72.8096	99.3554
1.60128	34.8391	53.2034	4.02642	66.8126	97.7926	1.6249	2.40108	3.69397	1.64704	28.9829	31.3974	0.82103	17.3504	24.0514	1.60063	72.9159	99.6743
1.60128	34.8391	53.2034	4.03679	66.6826	98.1686	1.62872	2.40068	3.69277	1.64704	28.9829	31.3974	0.82103	17.8606	24.0514	1.60429	73.0206	99.9886
1.60128	34.8391	53.2035	4.0437	66.679	98.1578	1.62872	2.29088	3.36336	1.64704	29.238	31.3974	0.828279	17.8594	24.0477	1.60795	72.9127	99.6649
1.61164	35.0907	53.1922	4.0437	66.679	98.1579	1.63254	2.14518	3.69158	1.66567	29.2343	31.3863	0.828279	17.8594	24.0477	1.60795	72.9127	99.6649
1.61509	35.0895	53.1886	4.06098	66.8007	98.523	1.64012	2.07013	2.7011	1.66567	28.868	31.0528	0.828279	18.1145	24.0477	1.61155	72.9112	99.6603
1.61855	35.0882	53.1847	4.07481	66.7934	98.5011	1.64769	2.39871	3.68685	1.66567	28.868	31.0528	0.835595	18.1133	24.044	1.62247	72.8002	99.3274
1.622	34.5763	53.1811	4.08172	66.6591	98.0982	1.65152	1.9592	2.36832	1.66567	28.868	31.0528	0.835595	18.1133	24.044	1.62613	72.6924	99.0038
1.62546	35.0858	53.1773	4.09555	66.6518	98.0763	1.65527	2.25259	4.0138	1.67317	28.7554	30.7148	0.835595	18.1133	24.044	1.62973	72.7971	99.3181
1.62891	35.3399	53.1736	4.099	66.9115	98.8554	1.66291	2.50689	4.01139	1.67685	28.8658	31.0461	0.846435	18.3238	24.6755	1.62973	72.6908	98.9992
1.63589	34.9485	52.7655	4.10246	66.7789	98.4577	1.66291	2.25178	4.01139	1.67685	28.4995	30.7126	0.846435	18.1114	24.0385	1.63339	72.6893	98.9945
1.63589	35.5928	53.166	4.11283	66.5182	98.4414	1.66291	1.92249	3.0235	1.68061	28.7539	30.7104	0.846435	18.1114	24.0385	1.64431	72.6846	98.9806
1.6428	35.4568	52.758	4.12319	67.2788	98.425	1.67049	2.17682	3.02119	1.68436	28.243	30.7082	0.846435	17.8563	24.0385	1.64431	72.8972	99.6183
1.6428	35.4568	52.7581	4.13702	67.2716	98.4033	1.67049	2.17682	3.02119	1.68804	28.3534	31.0395	0.846435	17.6439	23.4014	1.64431	72.5358	99.2994
1.6428	35.0795	53.1585	4.13702	67.2716	98.4033	1.67049	2.06707	2.69192	1.69548	28.3519	31.0351	0.846435	17.6439	23.4014	1.64431	72.8546	100.256
1.6428	35.0795	53.1586	4.13702	67.0162	98.4033	1.67049	2.06707	2.69192	1.69923	28.4623	31.3663	0.850093	17.6433	23.3996	1.65157	72.0862	100.247
1.65316	35.0758	53.1474	4.16467	67.0017	98.3597	1.67431	1.92133	3.02002	1.70298	28.4616	31.3641	0.850093	17.6433	23.3996	1.65157	72.639	99.609
1.66007	34.5626	53.1399	4.16467	66.7463	98.3598	1.68564	1.92017	3.01656	1.70298	28.4616	31.3641	0.850093	17.8556	24.0366	1.65883	72.6359	99.5996
1.66007	34.5626	53.1399	4.17849	66.2283	98.338	1.69329	2.13886	3.67261	1.70298	28.4616	31.3641	0.857342	17.8544	24.0329	1.65523	72.6374	99.6043
1.66007	35.0733	53.14	4.19231	66.2211	98.3162	1.69329	2.13886	3.67261	1.70298	28.1282	30.3638	0.857342	17.8544	24.0329	1.65883	72.891	99.5996
1.66352	34.9386	52.7358	4.19577	66.4747	98.3109	1.69704	2.24819	4.00062	1.70298	27.8731	30.3638	0.857342	17.8544	24.0329	1.66249	72.9957	99.9137
1.67043	35.203	53.5291	4.19577	66.73	98.3109	1.70086	2.13807	3.67024	1.70298	27.8731	30.3638	0.857342	17.9606	24.3514	1.66616	72.9941	99.909
1.67389	35.4686	54.3258	4.20959	67.1087	98.6807	1.70844	2.13728	3.66788	1.71042	27.8716	30.3594	0.857342	17.9606	24.3514	1.66975	72.9926	99.9044
1.67734	35.3339	53.9217	4.21305	67.6177	98.6753	1.70844	1.91785	3.00959	1.71785	28.0141	30.0217	0.857342	17.9606	24.3514	1.68067	72.9879	99.8903
1.68079	35.588	53.9179	4.22687	67.0997	98.6537	1.70844	1.91785	3.00959	1.71785	28.0141	30.0217	0.857342	17.9606	24.3514	1.67708	72.7343	99.8949
1.68425	35.7202	54.3145	4.23379	67.096	98.6426	1.70844	1.80814	2.68045	1.72529	28.0127	30.0173	0.86825	17.9587	24.3458	1.68067	72.6692	98.9342
1.6877	35.5855	53.9104	4.23724	67.2247	99.0287	1.71601	1.91708	3.00728	1.7216	27.7583	30.0195	0.86825	17.4485	24.3458	1.68793	72.411	98.9249
1.69116	35.5843	53.9067	4.25798	67.2136	98.9955	1.71984	1.91669	3.00611	1.72529	27.5025	30.0173	0.86825	17.4485	24.3458	1.6916	72.7281	99.8763
1.69468	35.3276	53.9028	4.25798	67.2137	98.9958	1.72366	2.06171	2.67585	1.73279	27.501	30.013	0.871907	17.4479	24.3439	1.69885	72.5125	99.2296
1.69116	35.3289	53.9066	4.26144	67.2119	98.9903	1.72366	2.06171	2.67585	1.74023	27.4996	30.0086	0.871907	17.4479	24.3439	1.69885	72.8312	100.186
1.69813	35.3264	53.8991	4.27872	67.2028	98.963	1.73506	2.38962	3.65957	1.74398	27.4988	30.0064	0.871907	17.3845	23.3886	1.70252	72.9358	100.5
1.69813	35.3263	53.899	4.28217	67.3314	99.349	1.73506	1.29524	2.6724	1.75142	27.3863	29.6688	0.871907	17.6397	23.3886	1.70252	72.9358	100.5
1.70159	34.8144	53.8953	4.296	67.0687	99.3269	1.73506	1.80546	2.6724	1.75885	27.8951	29.6645	0.879157	17.6384	23.3849	1.70252	72.8296	100.181
1.7085	35.8334	53.8878	4.30291	67.19	98.9247	1.73506	2.13451	3.65957	1.7626	27.8944	29.6624	0.879157	17.6384	23.3849	1.70252	72.8296	100.181
1.71195	35.5768	53.8841	4.31328	67.1845	98.9082	1.73881	1.29486	2.67127	1.7626	27.8944	29.6624	0.879157	17.6384	23.3849	1.70618	72.828	100.176
1.71541	35.3088	53.0801	4.3202	67.8221	99.2887	1.74263	1.80469	2.67012	1.7626	27.8944	29.6624	0.882815	17.9562	24.3383	1.70978	72.8265	100.172
1.71886	35.3075	53.0764	4.32711	67.8185	99.2777	1.75778	1.80317	2.66554	1.77004	27.6378	29.6581	0.882815	17.9562	24.3383	1.71704	72.8234	100.162
1.71886	35.5629	53.0764	4.34093	67.8112	99.2558	1.75778	1.54806	2.66554	1.77004	27.1276	29.6581	0.886406	17.9556	24.3364	1.72796	72.8187	100.148
1.72231	36.0838	53.8727	4.35476	67.5484	99.2338	1.75778	1.54806	2.66554	1.77379	26.8718	29.6559	0.886406	17.9556	24.3364	1.73162	72.8171	100.143
1.72231	36.0838	53.8727	4.36167	67.5448	99.2229	1.75778	1.54806	2.66554	1.77747	26.3609	29.6538	0.886406	17.9556	24.3364	1.73528	72.8155	100.139
1.72231	36.0838	53.8727	4.36512	67.543	99.2175	1.76161	1.29256	2.66438	1.77747	26.8711	29.6538	0.886406	17.9556	24.3364	1.73888	72.6016	99.4969
1.72577	35.8271	53.869	4.37204	67.6697	99.5975	1.76543	1.54729	2.66323	1.77747	26.76	29.3206	0.886406	17.9556	24.3364	1.73888	72.6016	99.4969
1.73959	35.8221	53.8539	4.37895	67.666	99.5864	1.76918	1.80202	2.66209	1.77747	26.5049	29.3206	0.890064	17.955	24.3346	1.73888	72.6016	99.4969
1.74304	35.9542	54.2502	4.39623	67.1461	99.5591	1.76918	1.80202	2.66209	1.78866	26.5028	29.3141	0.893722	17.8482	24.0143	1.73888	72.6016	99.4969
1.7465	35.553	53.0466	4.39968	66.889	99.5537	1.77676	1.80126	2.6598	1.78866	26.5028	29.3141	0.893722	18.0605	24.651	1.73888	72.4955	99.1784
1.75347	35.2951	53.0391	4.4066	66.8853	99.5427	1.78058	1.80087	2.65865	1.79241	26.5021	29.312	0.893722	18.0605	24.651	1.75346	72.5954	99.4782
1.75693	35.5604	53.835	4.41351	67.1369	99.5317	1.7844	1.80049	2.6575	1.79985	26.5006	29.3077	0.897313	17.8476	24.0125	1.75706	72.5511	100.111
1.76038	35.5592	53.8313	4.42388	67.6422	99.5152	1.78816	1.545	2.65636	1.8036	26.4999	29.3055	0.900971	17.996	23.6923	1.76072	73.0597	100.106
1.76038	35.5592	53.8314	4.42388	67.6422	99.5152	1.7958	1.1795	2.3252	1.8036	26.4999	29.3055	0.900971	18.1021	24.0106	1.76798	73.1627	100.415
1.76383	35.6913	54.2276	4.44807	67.6294	99.4766	1.79956	1.28874	2.65292	1.80729	26.2771	28.6371	0.90822	18.1009	24.0069	1.76798	73.1627	100.415
1.76383	35.6913	54.2276	4.44807	67.4991	99.0858	1.80713	1.43349	2.32182	1.80729	26.2771	28.6371	0.90822	18.207	24.3252	1.76798	72.6525	100.415
1.76383	35.6913	54.2276	4.44807	67.4992	99.086	1.81095	1.4331	2.32068	1.80729	26.1331	28.9703	0.90822	18.058	24.6435	1.77524	73.1596	100.405
1.77074	35.6887	54.22	4.47226	67.7467	99.8286	1.81095	1.4331	2.32068	1.81104	26.2434	29.3012	0.90822	18.2702	25.2802	1.7789	72.3294	99.4456
1.77765	35.6862	54.2125	4.47572	67.8751	100.214	1.81478	1.76151	3.3059	1.81472	25.9876	29.2991	0.911878	18.2695	25.2782	1.7789	73.0947	99.4456
1.77765	35.6862	54.2125	4.47917	67.7431	99.8177	1.81853	1.43235	2.31841	1.81847	25.9869	29.297	0.911878	18.2695	25.2782	1.7789	72.3294	99.4456
1.77765	35.8195	54.6124	4.48263	67.4858	99.812	1.82235	1.65114	2.97479	1.82223	25.9861	29.2948	0.911878	18.2695	25.2782	1.78257	72.6462	100.396
1.77765	35.8195	54.6124	4.49645	67.4785	99.7901	1.82235	1.50562	3.30356	1.82966	25.9847	29.2905	0.911878	18.0573	24.6416	1.78616	72.3896	100.391
1.78456	36.0724	54.6049	4.49991	68.4981	99.7846	1.82235	1.76073	3.30356	1.82966	25.8737	28.9575	0.91547	17.5465	24.6398	1.79349	72.3864	100.382
1.78456	36.0724	54.6049	4.51719	67.4674	99.7569	1.82993	1.65037	2.97248	1.82966	25.6185	28.9575	0.91547	17.5465	24.6398	1.79708	72.3849	100.377
1.79838	35.812	54.5897	4.52411	67.3337	99.3559	1.83375	0.884658	2.97131	1.8371	25.5061	28.6202	0.922785	17.5452	24.636	1.79708	72.3849	100.377
1.79838	35.6787	54.1898	4.53448	67.3283	99.3395	1.83375	0.884658	2.97131	1.85572	25.5025	28.6096	0.922785	17.5452	24.636	1.79708	72.64	100.377
1.79838	35.9341	54.1898	4.54139	67.4546	99.7184	1.84133	1.28454	2.6403	1.85572	25.6135	28.9426	0.922785	17.8003	24.636	1.80075	72.6384	100.373
1.79838	35.4233	54.1898	4.55176	67.3238	100.092	1.84133	1.17497	2.3116	1.85947	25.7238	29.2734	0.930035	18.0542	24.6323	1.81167	72.6337	100.358
1.80881	35.5527	54.5782	4.55867	67.8356	100.862	1.84133	1.17497	2.3116	1.85947	25.3577	28.9405	0.930035	18.0542	24.6323	1.808	72.3802	100.363
1.81226	35.8069	54.5746	4.56558	67.5765	100.851	1.8489	1.42933	2.30934	1.85947	25.3577	28.9405	0.926377	18.0548	24.6342	1.81167	72.3786	100.358
1.81226	36.0733	55.3737	4.56904	67.5747	100.845	1.85655	1.42857	2.30706	1.86691	24.9902	28.6033	0.926377	18.0548	24.6342	1.81167	71.8684	100.358
1.81226	36.0733	55.3738	4.58977	67.559	100.032	1.8603	1.42819	2.30594	1.86691	25.2453	28.6033	0.937284	18.053	24.6285	1.82259	71.8637	100.344
1.81572	35.8056	54.5707	4.59669	67.8107	100.02	1.8603	1.42819	2.30594	1.87434	25.2439	28.599	0.930035	18.0542	24.6323	1.82259	71.8637	100.344
1.81572	35.8056	54.5707	4.60705	67.8052	100.004	1.86412	1.53735	2.63342	1.87434	25.2439	28.599	0.933626	17.5434	24.6304	1.82619	71.8621	100.34
1.82608	36.0573	54.5594	4.60705	68.0606	100.004	1.86788	1.53697	2.63228	1.87434	25.2439	28.599	0.937284	18.053	24.6285	1.83711	71.8574	100.326
1.82954	36.056	54.5555	4.61051	68.0587	99.9985	1.8717	1.68217	2.30253	1.88553	25.2418	28.5927	0.937284	18.053	24.6285	1.83711	72.3676	100.326
1.83299	36.3211	55.3509	4.62088	68.1833	100.372	1.87927	1.93652	2.30027	1.88553	25.2418	28.5927	0.937284	17.5427	24.6285	1.83711	72.1125	100.326
1.83299	36.5765	55.3509	4.6347	68.1758	100.35	1.87927	1.68141	2.30027	1.88928	25.7514	28.5905	0.937284	18.3081	24.6285	1.83711	72.1125	100.326
1.83644	36.5752	55.3471	4.64507	68.0448	100.723	1.87927	1.68141	2.30027	1.89672	25.75	28.5863	0.944533	18.562	24.6248	1.84077	72.111	100.321
1.83644	36.7085	55.7468	4.65198	68.0411	100.712	1.88692	1.93576	2.29799	1.89672	25.639	28.2535	0.944533	18.3069	24.6248	1.84077	72.111	100.321
1.85026	36.3038	54.5329	4.65889	67.782	100.701	1.89067	1.42517	2.29687	1.89672	24.8736	28.2535	0.951849	18.3056	24.621	1.84803	72.1078	100.311
1.85026	36.3038	54.5329	4.66235	68.291	100.695	1.89067	1.42517	2.29687	1.89672	24.8736	28.2535	0.959098	18.3043	24.6172	1.84803	72.1078	100.311
1.85372	36.0471	54.529	4.67963	68.1519	100.278	1.8945	1.16968	2.29573	1.90415	24.8722	28.2493	0.959098	18.0492	24.6172	1.86621	72.1	100.288
1.85372	35.7917	54.529	4.69	68.1464	100.261	1.8945	1.42479	2.29573	1.90415	24.5395	27.251	0.959098	17.645	24.9354	1.86987	72.1614	101.237
1.8676	35.5203	53.7147	4.69345	68.1445	100.256	1.90207	1.42403	2.29346	1.90415	24.5395	27.251	0.959098	17.645	24.9354	1.86987	72.4165	101.237
1.8676	35.7867	54.5138	4.70037	68.1409	100.245	1.90965	1.42328	2.2912	1.91909	24.7918	27.2427	0.959098	17.645	24.9354	1.86987	72.4165	101.237
1.8676	35.7867	54.5138	4.70382	68.3987	101.018	1.92105	1.42215	2.2878	1.91909	24.5367	27.2427	0.96269	18.1546	24.9335	1.86987	72.3105	100.919
1.8676	35.7757	53.7147	4.7211	67.8786	100.99	1.92487	1.67687	2.28666	1.91909	24.7918	27.2427	0.96269	18.4098	24.9335	1.87713	72.3073	100.91
1.8676	36.4306	54.9131	4.73493	68.2522	100.579	1.92487	1.42177	2.28666	1.92285	24.536	27.2406	0.970005	18.4085	24.9297	1.88079	72.3058	100.905
1.87451	36.428	54.9055	4.73839	67.9949	100.573	1.92862	1.42139	2.28554	1.92653	24.868	28.2367	0.973597	18.1527	24.9278	1.88805	72.3026	100.896
1.87796	36.1714	54.9017	4.7453	67.9912	100.562	1.93244	1.1659	2.2844	1.93397	24.6115	28.2325	0.977255	18.4072	24.9259	1.88439	71.9431	100.582
1.88487	35.658	54.8941	4.7453	67.9912	100.562	1.93244	1.1659	2.2844	1.93772	24.6108	28.2304	0.977255	18.1521	24.9259	1.88805	71.8355	100.26
1.88487	35.7912	55.2936	4.76604	68.1099	100.918	1.93627	1.12933	2.94002	1.94147	24.6101	28.2282	0.977255	18.1521	24.9259	1.88805	71.3253	100.26
1.88833	35.7899	55.2898	4.76949	68.1081	100.913	1.94002	1.12895	2.93887	1.94515	24.4985	27.8935	0.977255	18.2581	25.244	1.88805	71.3253	100.26
1.89524	35.7874	55.2822	4.77986	68.1026	100.896	1.94384	1.38367	2.9377	1.95266	25.0073	27.8893	0.973597	18.2588	25.2459	1.89531	72.1935	100.568
1.89524	35.7874	55.2822	4.79369	67.8397	100.874	1.94384	1.16477	2.28099	1.95266	25.0073	27.8893	0.973597	18.2588	25.2459	1.90257	72.0843	100.241
1.89524	36.2982	55.2822	4.79714	68.0933	100.868	1.94766	1.16439	2.27985	1.95266	25.0073	27.8893	0.977255	18.2581	25.244	1.90623	72.4007	101.19
1.9056	35.5282	55.2708	4.80406	67.8341	100.857	1.95142	1.16401	2.27873	1.96009	24.2406	27.8851	0.980912	18.2575	25.2421	1.9099	72.3991	101.185
1.90905	36.2931	55.2669	4.80751	67.8323	100.852	1.95899	1.16326	2.27647	1.96378	24.2066	28.5482	0.984504	18.1508	24.9222	1.91349	72.3976	101.181
1.90905	36.2931	55.2669	4.82479	68.0784	100.824	1.96282	1.41799	2.27533	1.96378	23.6964	28.5482	0.984504	18.1508	24.9222	1.91716	72.184	100.54
1.90905	36.2931	55.267	4.82825	68.0766	100.818	1.96664	1.41761	2.27419	1.96378	24.2066	28.5482	0.984504	18.2569	25.2402	1.91716	72.184	100.54
1.90905	36.2931	55.2669	4.84207	68.1989	101.185	1.96664	1.1625	2.27419	1.97128	24.2051	28.5439	0.988162	18.1502	24.9203	1.92808	71.8182	100.208
1.91251	36.425	55.6625	4.85244	68.5782	101.557	1.96282	1.16288	2.27533	1.97128	23.8726	27.5463	0.988162	18.1502	24.9203	1.92808	71.8182	100.208
1.91942	36.2893	55.2555	4.8559	68.5765	101.552	1.97421	1.16175	2.27193	1.97872	24.1263	27.5422	0.991753	18.6598	24.9184	1.92808	71.9242	100.526
1.91942	35.7785	55.2555	4.86281	68.5728	101.541	1.97804	0.906258	2.27079	1.98247	24.0482	26.5426	0.991753	18.7658	25.2364	1.92808	71.9242	100.526
1.93676	35.5167	55.2364	4.88354	68.3061	101.507	1.97804	0.906258	2.27079	1.98615	24.38	27.538	0.991753	18.7658	25.2364	1.93534	71.9211	100.516
1.93676	35.5167	55.2364	4.887	68.5597	101.501	1.98937	1.05084	1.9392	1.9899	24.0469	26.5385	1.00266	18.7639	25.2307	1.94259	71.9179	100.507
1.93676	35.5167	55.2364	4.89046	68.3025	101.496	1.98937	1.01453	2.59561	1.9899	24.2685	27.2034	1.00266	18.2537	25.2307	1.94626	72.2342	101.456
1.93676	35.8944	54.837	4.89391	68.171	101.102	1.99319	1.05046	1.93807	1.98615	23.759	27.2055	1.00266	18.2537	25.2307	1.94626	71.9164	100.502
1.94367	35.8919	54.8294	4.91811	68.158	101.063	1.99701	1.5603	1.93695	1.9899	23.7583	27.2034	1.00632	17.9979	25.2288	1.94259	71.9179	100.507
1.95057	35.8893	54.8218	4.91811	68.4134	101.063	1.99701	1.15948	2.26512	1.99359	23.7576	27.2014	1.00632	17.892	24.9108	1.94626	71.9164	100.502
1.95057	36.0224	55.2211	4.93193	68.5355	101.429	2.00076	1.1591	2.264	1.99734	23.5018	27.1993	1.00632	17.892	24.9108	1.94626	71.9164	100.502
1.95748	36.0199	55.2135	4.93884	68.7871	101.417	2.00459	1.15872	2.26286	2.00109	23.7562	27.1972	1.00632	17.786	24.5928	1.95718	71.9116	100.488
1.96439	36.1504	55.605	4.9423	68.53	101.412	2.00841	1.15834	2.26172	2.00109	23.246	27.1972	1.00998	18.1464	24.9089	1.96078	71.9101	100.483
1.96785	36.5269	55.202	4.9423	68.7853	101.412	2.01216	1.15797	2.2606	2.00853	23.2447	27.1931	1.01357	18.2518	25.225	1.96444	71.9085	100.479
1.96785	36.66	55.6013	4.96649	68.7723	101.373	2.01216	0.902863	2.2606	2.01596	22.9882	27.189	1.01723	18.2512	25.2231	1.96444	71.9085	100.479
1.96785	36.7929	56.0001	4.96649	68.5169	101.373	2.02356	0.901729	2.2572	2.0234	22.8425	27.5172	1.01723	17.8272	23.9513	1.97536	71.9038	100.465
1.9713	36.7916	55.9962	4.97341	68.5132	101.362	2.02738	0.901349	2.25606	2.02715	22.8418	27.5151	1.01723	17.9332	24.2692	1.97536	71.9038	100.465
1.97476	36.402	55.5935	4.98032	68.6354	100.962	2.03114	0.900976	2.25494	2.02715	23.3855	26.8504	1.01723	17.9332	24.2692	1.97536	71.3936	100.465
1.98173	36.3994	55.5858	4.98723	68.3763	100.951	2.02738	0.791991	1.92798	2.02715	22.4759	27.1828	1.01723	17.9332	24.2692	1.97896	71.1369	100.46
1.98173	36.3994	55.5858	5.00106	68.4948	100.54	2.03496	0.791246	1.92575	2.0309	22.9854	27.1807	1.02082	17.9326	24.2674	1.97896	71.1369	100.46
1.99209	36.3956	55.5743	5.0218	68.8684	100.895	2.03496	0.791246	1.92575	2.03459	22.9848	27.1787	1.02082	18.2505	25.2212	1.97896	71.031	100.142
1.99209	36.3956	55.5743	5.0218	68.4837	100.507	2.04254	0.790501	1.92351	2.03834	22.9841	27.1766	1.02813	18.2493	25.2174	1.9972	71.0232	100.119
1.99209	36.3956	55.5743	5.02871	68.6094	100.884	2.04636	0.279908	1.92239	2.04209	22.9834	27.1745	1.02813	18.2493	25.2174	1.9972	72.1495	100.436
1.99555	36.3943	55.5706	5.03216	68.8628	100.879	2.05011	0.789756	1.92128	2.04953	22.8712	26.8381	1.02813	18.2493	25.2174	1.9972	72.0436	100.119
1.999	36.393	55.5667	5.03216	68.8664	101.655	2.06151	0.788635	1.91792	2.04953	22.7605	26.5058	1.02813	18.2493	25.2174	2.0008	71.1275	100.432
1.999	36.5259	55.9654	5.04253	68.9936	102.803	2.06533	0.788259	1.91679	2.04953	22.539	25.8413	1.02813	18.0373	24.5816	2.0008	71.1275	100.432
2.00591	36.9012	55.5591	5.04944	68.9899	102.792	2.06533	0.788259	1.91679	2.05321	23.0485	25.8393	1.02813	18.2493	25.2174	2.01172	71.1228	100.417
2.00937	36.8999	55.5552	5.06672	68.9805	102.764	2.06915	0.459947	0.931855	2.06071	22.5369	25.8352	1.02813	18.2493	25.2174	2.01538	71.1212	100.413
2.00937	36.8999	55.5551	5.07709	68.7161	101.971	2.06915	0.459947	0.931855	2.06071	22.7584	26.4997	1.03904	18.2906	24.5759	2.01538	71.2271	100.73
2.01628	36.8974	55.5476	5.084	68.9677	101.959	2.06915	0.204838	0.931855	2.0644	22.2812	25.8332	1.03904	18.5025	25.2117	2.01538	71.9924	100.73
2.01628	36.6421	55.5476	5.10128	68.9584	101.931	2.07291	0.423097	1.58663	2.06815	22.502	26.4956	1.04263	18.5019	25.2098	2.01898	71.9908	100.726
2.01973	36.6408	55.5437	5.10474	68.9565	101.926	2.07673	0.422726	1.58552	2.06815	22.502	26.4956	1.03904	18.2474	25.2117	2.02264	71.9892	100.721
2.02318	37.0384	56.7365	5.11511	68.9509	101.909	2.08431	0.531284	1.91119	2.07558	22.5006	26.4916	1.03538	18.248	25.2136	2.02631	71.6701	99.7634
2.02664	37.0371	56.7326	5.11856	68.9491	101.903	2.08431	0.677098	1.58331	2.07934	22.1678	25.493	1.03538	18.248	25.2136	2.03356	71.6669	99.754
2.03009	36.7804	56.7287	5.12893	68.688	101.886	2.0957	0.785272	1.90783	2.08302	22.3885	26.1553	1.04263	18.2467	25.2098	2.03716	71.9829	100.702
2.037	36.7778	56.7209	5.12893	68.9434	101.886	2.0957	1.29549	1.90783	2.08677	22.1328	26.1533	1.03904	17.482	25.2117	2.04082	71.9814	100.697
2.037	36.7778	56.721	5.14967	69.446	102.628	2.09953	1.29511	1.9067	2.09052	22.1321	26.1512	1.04988	17.4801	25.206	2.04449	71.9798	100.693
2.04398	36.5093	55.9155	5.15312	69.4441	102.623	2.09953	0.784897	1.9067	2.09796	22.1307	26.1472	1.05354	17.4795	25.2041	2.04449	71.9798	100.693
2.04743	36.6409	56.3104	5.16004	69.1819	101.836	2.1071	0.784152	1.90447	2.1054	22.1294	26.1431	1.05354	17.4795	25.2041	2.05174	71.9766	100.683
2.04743	36.508	55.9116	5.17732	69.4309	102.583	2.1071	1.00269	2.56009	2.1054	22.1294	26.1431	1.05354	17.4795	25.2041	2.05174	71.9766	100.683
2.04743	36.508	55.9116	5.18077	69.4291	102.577	2.1185	0.746436	2.55665	2.10171	22.13	26.1451	1.0572	17.4789	25.2022	2.05174	71.9766	100.683
2.05089	36.5067	55.9077	5.18769	69.17	102.566	2.1185	1.00154	2.55665	2.10171	22.0194	25.8131	1.0572	17.9891	25.2022	2.059	72.1851	101.309
2.0578	36.5042	55.9001	5.19114	69.1682	102.561	2.1185	0.746436	2.55665	2.10171	22.0194	25.8131	1.06079	17.9885	25.2003	2.06267	72.1836	101.304
2.0647	36.5016	55.8925	5.21188	69.1569	102.527	2.1185	0.746436	2.55665	2.10171	22.0194	25.8131	1.06079	17.9885	25.2003	2.06626	71.9703	100.664
2.06816	36.5003	55.8885	5.21879	69.4084	102.515	2.12608	0.745674	2.55436	2.11658	22.0167	25.805	1.06079	17.9885	25.2003	2.06626	71.9703	100.664
2.06816	36.5003	55.8886	5.21879	69.2792	102.128	2.1299	0.74529	2.55321	2.12777	22.2698	25.799	1.06445	17.9878	25.1984	2.06626	71.9703	100.664
2.07161	36.4991	55.8848	5.22916	69.1445	101.724	2.12608	0.527178	1.89887	2.12777	22.2698	25.799	1.06445	17.9878	25.1984	2.08085	71.964	100.645
2.07507	37.2639	55.8809	5.23953	69.5233	102.094	2.13365	0.744913	2.55208	2.12777	21.7596	25.799	1.0681	17.9872	25.1965	2.08085	71.964	100.645
2.07507	37.2639	55.8809	5.2499	69.2623	102.077	2.13365	0.672302	1.56892	2.13152	21.7589	25.7969	1.07894	17.9853	25.1908	2.08811	71.7493	100.001
2.08198	37.2613	55.8732	5.25681	69.2586	102.066	2.15263	0.998114	2.54636	2.13152	21.5375	25.1329	1.07894	17.9853	25.1908	2.09177	72.2144	100.631
2.08543	37.26	55.8693	5.26027	69.6413	102.448	2.15645	0.670087	1.56227	2.13896	21.7575	25.7929	1.07894	17.9853	25.1908	2.09177	72.2144	100.631
2.09234	37.2575	55.8617	5.26718	69.6375	102.436	2.15645	0.888516	2.21756	2.14639	21.7562	25.7889	1.07894	17.9853	25.1908	2.09536	72.2128	100.626
2.09932	37.2549	55.854	5.27409	69.6337	102.425	2.15645	0.670087	1.56227	2.14639	21.7562	25.7889	1.07894	17.7302	25.1908	2.09536	71.9577	100.626
2.09932	37.2548	55.8538	5.28792	69.6263	102.403	2.15645	0.779301	1.88992	2.14639	21.7562	25.7889	1.07894	17.7302	25.1908	2.10269	71.8053	100.934
2.09932	37.2549	55.8539	5.29137	69.6243	102.397	2.15645	0.670087	1.56227	2.15758	22.0093	25.7828	1.0826	17.7295	25.1889	2.10629	71.7602	101.564
2.09932	37.2549	55.854	5.30174	69.2371	102.767	2.15645	0.670087	1.56227	2.15758	21.6435	25.4509	1.0826	17.7295	25.1889	2.11361	72.0121	101.555
2.10277	36.7429	55.85	5.3052	69.2352	102.762	2.16027	0.451295	0.905898	2.16133	21.3877	25.4489	1.0826	17.8787	24.8712	2.11361	71.4832	99.9681
2.12004	36.4811	55.8309	5.31902	69.2276	102.739	2.16403	0.450939	0.904829	2.16133	21.3877	25.4489	1.07894	18.1345	24.8731	2.11361	72.0121	101.555
2.12004	36.4811	55.8309	5.32939	69.3483	102.335	2.16785	0.450576	0.903741	2.17621	21.385	25.4409	1.07894	17.9853	25.1908	2.11361	71.8005	100.92
2.11659	36.4824	55.8348	5.34321	69.3408	102.312	2.17925	0.959711	0.900494	2.17621	21.385	25.4409	1.07894	17.9853	25.1908	2.12087	71.7974	100.911
2.12004	36.7365	55.8309	5.34321	69.2117	101.925	2.18682	0.958992	0.898337	2.17996	21.3843	25.4389	1.07894	17.9853	25.1908	2.12447	72.0509	100.906
2.12004	37.135	57.0263	5.35358	69.2061	101.908	2.19064	1.17698	1.55231	2.17996	21.3843	25.4389	1.0826	17.9846	25.1889	2.12813	71.7942	100.901
2.1235	37.1337	57.0224	5.36395	69.2004	101.892	2.1944	1.17662	1.55121	2.18739	21.383	25.4349	1.09717	17.727	25.1813	2.13179	71.7926	100.896
2.12695	37.1324	57.0185	5.36741	69.3276	102.273	2.19822	0.921136	1.5501	2.18739	21.2724	25.1031	1.09717	17.9821	25.1813	2.13905	71.7895	100.887
2.13041	36.9983	56.6164	5.36741	69.8409	103.047	2.20197	0.665664	1.549	2.19115	20.8721	25.4329	1.09717	17.9821	25.1813	2.13905	71.7895	100.887
2.13731	36.8629	56.2102	5.38814	69.8296	103.013	2.20197	0.665664	1.549	2.19483	20.8715	25.4309	1.09717	17.9821	25.1813	2.14271	71.7879	100.882
2.13731	36.8629	56.2102	5.38814	69.8295	103.013	2.20962	0.664921	1.54678	2.19483	21.5263	25.0991	1.10076	18.0874	25.4972	2.14631	71.7863	100.877
2.13731	36.8629	56.2102	5.40542	69.8202	102.984	2.20962	0.518967	1.87424	2.19483	21.5263	25.0991	1.10442	18.0868	25.4953	2.15723	71.7816	100.863
2.14768	36.6037	56.1986	5.41233	69.5609	102.973	2.2058	0.519343	1.87537	2.19858	20.7602	25.0971	1.10442	18.0868	25.4953	2.15723	72.2918	100.863
2.15113	36.6024	56.1947	5.4227	69.5553	102.956	2.2058	0.410183	1.54789	2.20226	20.7596	25.0952	1.10442	17.9375	25.8129	2.1609	72.2902	100.858
2.15465	36.4683	55.7925	5.43307	69.1655	102.552	2.2058	0.519343	1.87537	2.20977	20.6476	24.7594	1.10442	18.0868	25.4953	2.1609	72.2902	100.858
2.15811	36.467	55.7886	5.43307	69.2943	102.939	2.2058	0.410183	1.54789	2.20977	20.5371	24.4277	1.10442	18.1927	25.8129	2.16815	72.287	100.849
2.16156	36.3431	56.1831	5.4469	69.4156	103.303	2.21719	0.190783	0.889688	2.20977	20.6476	24.7594	1.10442	18.3419	25.4953	2.16815	71.7768	100.849
2.16156	36.5985	56.1832	5.46072	69.5369	103.667	2.22477	0.40834	1.54236	2.2172	20.6463	24.7555	1.11167	18.3406	25.4914	2.17541	71.668	100.522
2.16502	36.9955	57.3741	5.47109	69.5312	103.65	2.22859	0.407969	1.54125	2.2172	20.6463	24.7555	1.10801	18.3412	25.4934	2.17908	71.6664	100.518
2.16502	37.2509	57.3741	5.47109	69.5313	103.65	2.23617	0.334966	0.55691	2.22839	20.3892	24.7495	1.11532	18.8502	25.4895	2.17908	71.6664	100.518
2.16502	37.2509	57.3741	5.47801	69.9093	103.252	2.23617	0.0798567	0.55691	2.23208	20.6097	25.4109	1.11532	18.8502	25.4895	2.17908	71.6664	100.518
2.17193	37.2483	57.3663	5.48837	70.4144	103.235	2.23999	0.0794982	0.555835	2.23208	20.3546	25.4109	1.11532	18.34	25.4895	2.19359	72.1266	101.133
2.17538	36.8488	56.1677	5.49874	70.2799	102.831	2.23999	0.0794982	0.555835	2.23208	20.3546	25.4109	1.12623	18.338	25.4838	2.19359	71.8715	101.133
2.18574	36.8449	56.1561	5.50565	70.2762	102.82	2.24374	0.0791462	0.554779	2.23583	20.3539	25.4089	1.12623	18.338	25.4838	2.19726	71.6148	101.128
2.1892	36.8437	56.1524	5.51948	70.2686	102.797	2.24757	0.0787877	0.553703	2.24326	20.021	24.41	1.12623	18.338	25.4838	2.19726	71.6148	101.128
2.19611	36.9738	56.5429	5.52294	70.2667	102.792	2.25139	-0.176679	0.552628	2.25077	20.0197	24.4061	1.12623	17.8712	24.8485	2.20092	71.6132	101.123
2.19611	36.9738	56.5428	5.52985	69.4967	102.78	2.25897	0.0777188	0.550497	2.2582	20.2735	24.4022	1.12623	18.1888	25.8014	2.20092	71.2962	100.172
2.19611	37.4845	56.5428	5.54022	70.5148	103.536	2.26272	0.0404505	1.20402	2.26189	20.2728	24.4002	1.12982	18.0823	25.4819	2.20818	71.8032	100.163
2.19611	37.4845	56.5428	5.55058	69.4876	103.519	2.26654	0.9145	1.53019	2.26189	20.0177	24.4002	1.13348	18.0817	25.48	2.20818	71.8032	100.163
2.19956	37.2278	56.539	5.5575	69.4838	103.508	2.27036	0.512999	1.85634	2.26564	20.017	24.3982	1.13707	18.081	25.4781	2.21177	71.5028	100.792
2.19956	37.2379	57.3351	5.57478	69.985	103.479	2.27794	0.913393	1.52687	2.26939	20.0164	24.3963	1.13707	18.081	25.4781	2.21177	71.5028	100.792
2.20992	37.234	57.3235	5.57823	70.2385	103.473	2.28176	0.511879	1.85298	2.26939	20.0164	24.3963	1.14073	18.0804	25.4761	2.21177	71.5028	100.792
2.20992	37.234	57.3235	5.57823	70.1098	103.087	2.28552	0.912657	1.52466	2.27683	20.5253	24.3923	1.14073	18.0804	25.4761	2.23002	71.6005	101.085
2.21345	37.2327	57.3196	5.58169	69.9792	102.695	2.28552	0.912657	1.52466	2.27683	20.5253	24.3923	1.14073	18.0804	25.4761	2.23002	71.6005	101.085
2.21345	37.1	56.9213	5.60588	70.0947	103.042	2.28934	0.912286	1.52355	2.27683	20.5253	24.3923	1.14439	18.0797	25.4742	2.23002	71.8118	101.719
2.22381	37.0961	56.9097	5.60588	70.2233	103.428	2.28552	0.912657	1.52466	2.28058	20.0144	24.3904	1.14439	18.0797	25.4742	2.23728	71.5536	101.71
2.22726	36.9622	56.508	5.61625	70.0909	103.797	2.28934	0.912286	1.52355	2.2917	20.0125	24.3845	1.14439	18.1856	25.7918	2.24088	71.552	101.705
2.23072	36.9609	56.5042	5.61625	70.0909	103.797	2.29309	0.911922	1.52245	2.29545	20.0118	24.3825	1.14439	18.0797	25.4742	2.24088	71.0417	101.705
2.23072	36.9609	56.5042	5.63008	70.0833	103.774	2.29309	0.183581	0.868083	2.30289	20.2656	24.3786	1.14439	17.9739	25.1566	2.24088	71.0417	101.705
2.23417	37.0822	56.1022	5.64044	70.0776	103.757	2.29691	0.401333	1.52134	2.30289	20.2656	24.3786	1.14439	18.4841	25.1566	2.24088	71.0417	101.705
2.24799	36.9444	55.6888	5.65081	69.945	104.125	2.30074	0.182856	0.865907	2.30289	20.2656	24.3786	1.15529	18.1837	25.786	2.2482	70.8272	101.062
2.24799	36.9444	55.6888	5.65772	69.9412	104.114	2.31589	-0.0736897	0.861595	2.30664	18.9894	24.3766	1.15529	18.6939	25.786	2.25546	70.8241	101.052
2.25144	37.0758	56.0829	5.66464	69.9374	104.102	2.31971	0.144012	1.5147	2.30664	18.879	24.0452	1.15889	18.6933	25.7841	2.25912	71.3328	101.047
2.25144	37.8518	56.8786	5.67501	69.9317	104.085	2.31971	0.144012	1.5147	2.30664	18.9894	24.3766	1.16254	18.9478	25.7822	2.26272	71.5863	101.043
2.25144	37.8518	56.8786	5.68537	69.9259	104.068	2.31971	0.144012	1.5147	2.30664	19.6443	24.0452	1.16254	18.8419	25.4647	2.26638	71.5847	101.038
2.25835	37.0832	56.8709	5.68883	70.308	104.448	2.32353	0.143641	1.51359	2.31039	19.6436	24.0433	1.16979	18.8407	25.4609	2.26638	71.5847	101.038
2.25835	37.0831	56.8708	5.69229	69.9221	104.057	2.32353	-0.366576	1.51359	2.31407	19.4221	23.3786	1.16979	18.5856	25.4609	2.2773	71.58	101.024
2.26181	37.0819	56.867	5.6992	70.1738	104.045	2.32729	0.143276	1.51249	2.31783	19.311	23.0453	1.16979	18.5856	25.4609	2.2809	71.5784	101.019
2.27224	37.078	56.8553	5.70957	70.2965	104.414	2.33486	0.0335257	1.18324	2.3327	19.3084	23.0376	1.17345	18.5849	25.4589	2.2809	71.5784	101.019
2.27224	37.078	56.8553	5.7303	70.1565	103.994	2.34626	0.0324318	1.17996	2.3327	19.3084	23.0376	1.16979	18.3304	25.4609	2.28456	71.8319	101.014
2.27569	37.0766	56.8513	5.7303	70.1566	103.994	2.34626	0.0324318	1.17996	2.3327	19.0533	23.0376	1.16979	18.3304	25.4609	2.28456	71.8319	101.014
2.27569	36.8213	56.8514	5.73376	70.1547	103.988	2.35008	-0.0769332	0.851864	2.33645	19.1631	23.367	1.17704	18.4349	25.7745	2.28823	71.8303	101.009
2.27569	37.332	56.8514	5.75104	70.2735	104.345	2.35008	-0.185931	0.52487	2.33645	19.5286	23.6983	1.1807	18.9446	25.7726	2.29182	71.8288	101.005
2.28951	37.3268	56.8359	5.75795	70.3967	103.948	2.35008	-0.0769332	0.851864	2.33645	19.5286	23.6983	1.1807	18.6895	25.7726	2.29182	71.3186	101.005
2.28951	36.8161	56.8358	5.76487	70.5213	104.322	2.35008	-0.0769332	0.851864	2.35132	19.5261	23.6906	1.1807	18.6895	25.7726	2.29182	71.3186	101.005
2.29296	36.9474	57.2299	5.77178	70.7743	105.081	2.35391	0.0316982	1.17776	2.36251	19.5241	23.6848	1.1807	18.6895	25.7726	2.29548	71.317	101
2.29987	37.3229	56.8243	5.77523	70.5156	104.305	2.35766	0.031338	1.17668	2.36251	19.5241	23.6848	1.1807	18.6895	25.7726	2.29908	71.3154	100.995
2.29987	37.0676	56.8243	5.77869	70.5138	104.299	2.36148	0.139957	1.50253	2.36251	19.4898	24.3472	1.1807	18.4343	25.7726	2.29908	71.3154	100.995
2.29987	37.2002	57.222	5.80634	70.6268	104.638	2.36906	0.139221	1.50033	2.36251	19.1586	23.3535	1.18436	18.5395	26.088	2.30274	71.3138	100.991
2.30333	37.1989	57.2181	5.80634	70.7538	104.253	2.36906	0.139221	1.50033	2.36251	19.1586	23.3535	1.18436	18.5395	26.088	2.30274	71.3138	100.991
2.31024	37.1963	57.2104	5.80634	70.7538	104.253	2.37663	0.138486	1.49812	2.3737	19.1567	23.3478	1.19161	18.5382	26.0842	2.31	71.3106	100.981
2.31369	36.9396	57.2065	5.82016	70.8745	104.615	2.38428	0.137744	1.4959	2.3737	19.1567	23.3478	1.1952	18.5375	26.0823	2.31367	71.3091	100.976
2.31715	36.9383	57.2026	5.82362	70.8726	104.61	2.38803	0.0284238	1.16794	2.37745	19.4111	23.3458	1.1952	18.5375	26.0823	2.31733	71.3075	100.971
2.3206	36.937	57.1987	5.8409	71.1197	105.351	2.39185	0.647226	1.49369	2.37745	19.156	23.3458	1.1952	18.5375	26.0823	2.32459	71.0492	100.962
2.3206	36.937	57.1987	5.8409	71.1197	105.351	2.39561	-0.118464	1.4926	2.37745	19.0457	23.0147	1.1952	18.7927	26.0823	2.32818	71.0476	100.957
2.32406	37.7018	57.1948	5.85127	71.1139	105.333	2.39561	-0.118464	1.4926	2.38863	19.0437	23.0089	1.1952	19.0478	26.0823	2.32818	70.7924	100.957
2.32406	37.7018	57.1948	5.86509	71.1062	105.31	2.39943	0.282438	1.16465	2.39232	18.9327	22.6759	1.1952	18.7927	26.0823	2.33185	70.7908	100.953
2.32758	37.7005	57.1908	5.87546	70.8439	104.523	2.39943	0.136273	1.49148	2.39232	18.4225	22.6759	1.19886	18.792	26.0803	2.3391	70.8932	101.26
2.32758	37.4451	57.1909	5.88237	70.8401	104.512	2.39943	0.0273302	1.16465	2.39607	18.8217	22.3429	1.20251	18.474	25.1262	2.34277	70.9971	101.571
2.32758	37.4451	57.1908	5.88929	70.8362	104.5	2.41083	-0.300555	0.181	2.39607	18.3115	22.3429	1.20251	18.2189	25.1262	2.35003	71.5043	101.562
2.34139	37.4399	57.1752	5.89274	70.0681	104.495	2.4184	-0.301256	0.178896	2.40351	18.4206	22.6702	1.20251	18.5362	26.0784	2.35003	71.3988	101.245
2.34485	37.4386	57.1713	5.89966	70.8305	104.483	2.4184	0.02551	1.15919	2.40351	18.531	23.0013	1.20251	18.2811	26.0784	2.35003	70.6334	101.245
2.34485	37.4386	57.1714	5.91348	70.312	104.46	2.4184	-0.301256	0.178896	2.41094	18.5297	22.9975	1.20251	18.1753	25.761	2.35003	70.6334	101.245
2.3483	37.6927	57.1674	5.91694	70.8209	104.454	2.42223	0.0251433	1.15809	2.41469	18.6394	23.3266	1.20251	18.2811	26.0784	2.35369	71.1421	101.241
2.3483	37.6927	57.1675	5.93076	71.1968	104.816	2.43363	0.0240499	1.15481	2.41845	18.6388	23.3246	1.21342	18.5343	26.0726	2.36461	71.1373	101.226
2.35176	37.9564	57.9586	5.93076	71.4521	104.816	2.43363	0.0240499	1.15481	2.42213	18.6381	23.3227	1.21342	18.5343	26.0726	2.36461	71.1373	101.226
2.35521	37.6997	57.9546	5.93767	71.4483	104.804	2.44502	0.0229566	1.15153	2.42213	18.2727	22.9917	1.22067	18.533	26.0687	2.36821	71.3908	101.222
2.36212	37.5647	57.5495	5.94804	71.4425	104.787	2.44502	0.0229566	1.15153	2.42963	18.5265	22.9879	1.22067	18.533	26.0687	2.37553	71.5986	101.845
2.37248	37.3055	57.5378	5.95495	71.5668	105.16	2.44878	0.0225966	1.15045	2.43707	18.5253	22.9841	1.22067	18.7446	26.7033	2.37913	71.3861	101.207
2.37594	37.0488	57.5339	5.97224	71.1737	104.747	2.4526	0.02223	1.14935	2.44075	18.5246	22.9822	1.22067	18.7446	26.7033	2.37913	71.3861	101.207
2.37594	36.9162	57.1363	5.97915	70.7873	105.12	2.4526	0.02223	1.14935	2.44826	18.3785	23.3092	1.22067	18.4894	26.7033	2.38279	71.6396	101.202
2.37594	37.1717	57.1364	5.98606	70.528	105.108	2.46018	0.0215034	1.14717	2.44826	18.1234	23.3092	1.22067	18.4894	26.7033	2.39005	71.6364	101.193
2.37594	37.1717	57.1364	5.99297	70.5242	105.097	2.46018	0.0215034	1.14717	2.44826	18.1234	23.3092	1.22426	18.4888	26.7014	2.39005	71.6364	101.193
2.37594	37.5595	57.5339	6.01025	70.77	105.068	2.464	0.0211368	1.14607	2.44826	17.758	22.9783	1.22792	18.4881	26.6994	2.39371	71.2742	100.872
2.38285	37.5569	57.5261	6.01717	70.7661	105.056	2.46775	-0.234331	1.14499	2.44826	17.5029	22.9783	1.23158	18.4875	26.6974	2.39371	71.2742	100.872
2.38637	37.5555	57.5221	6.02062	71.2749	105.05	2.464	0.0211368	1.14607	2.44826	17.2478	22.9783	1.24248	18.274	26.0571	2.39731	71.2727	100.867
2.38982	37.2989	57.518	6.02753	71.5264	105.039	2.46775	0.0207768	1.14499	2.45194	17.7574	22.9764	1.24248	18.5291	26.0571	2.40097	71.0602	100.23
2.40019	38.0611	57.5065	6.03099	71.5245	105.033	2.47157	0.0204102	1.14389	2.45569	17.7568	22.9745	1.24248	19.0394	26.0571	2.40097	71.2711	100.862
2.40019	37.8057	57.5065	6.04827	71.5149	105.004	2.47915	-0.235424	1.14172	2.47056	17.7542	22.9669	1.24248	18.7843	26.0571	2.40823	71.057	100.22
2.40019	37.8057	57.5064	6.05173	71.513	104.999	2.47915	0.0196837	1.14172	2.47432	17.7536	22.9649	1.23158	18.6805	25.7456	2.40823	71.057	100.22
2.40364	37.6813	57.8995	6.06555	71.2499	104.975	2.48673	-0.236151	1.13954	2.47432	17.8984	22.6341	1.23158	18.2138	25.111	2.41549	71.3702	101.16
2.40709	37.8031	57.4987	6.07246	71.3741	105.348	2.48673	-0.746365	1.13954	2.47807	17.8978	22.6322	1.24248	18.2119	25.1053	2.42282	71.367	101.15
2.40709	37.6801	57.8957	6.08629	71.3664	105.325	2.48673	-0.49126	1.13954	2.48175	17.7869	22.2995	1.23517	18.2132	25.1091	2.42282	71.367	101.15
2.42091	37.4195	57.88	6.08629	71.3665	105.325	2.50195	-0.23761	1.13516	2.4855	17.8965	22.6284	1.24248	18.2119	25.1053	2.43733	71.3164	101.764
2.42091	37.4196	57.8801	6.08629	71.3665	105.325	2.49812	-0.601186	0.809758	2.48175	17.8971	22.6303	1.24608	18.3791	26.3724	2.43733	71.3164	101.764
2.42091	37.6748	57.88	6.0932	71.3631	106.081	2.51334	-0.602628	0.80543	2.4855	17.6414	22.6284	1.24248	18.3798	26.3743	2.441	71.5699	101.759
2.42091	37.4195	57.8799	6.10703	71.3553	106.058	2.51334	-0.347519	0.80543	2.49669	17.6395	22.6227	1.24248	18.1247	26.3743	2.44459	71.5683	101.754
2.43473	37.6696	57.8643	6.12431	71.2177	105.645	2.50952	-0.347157	0.806517	2.49669	17.6395	22.6227	1.24608	18.3791	26.3724	2.44459	71.3132	101.754
2.43473	37.925	57.8643	6.12776	70.9603	105.639	2.50952	-0.347157	0.806517	2.49669	17.5292	22.2919	1.24973	18.6336	26.3704	2.44459	71.1024	101.122
2.43819	38.1791	57.8604	6.13467	71.0844	106.011	2.51334	-0.238703	1.13188	2.50038	17.5286	22.2901	1.25698	18.6323	26.3666	2.44459	71.1024	101.122
2.44171	38.1778	57.8564	6.14159	70.9526	105.616	2.52092	-0.23943	1.1297	2.50413	17.528	22.2882	1.26423	18.631	26.3627	2.44826	71.417	102.066
2.44171	38.1778	57.8564	6.15196	71.9684	105.598	2.52474	-0.239796	1.1286	2.50413	17.2728	22.2882	1.26423	18.631	26.3627	2.45192	71.4154	102.061
2.44516	37.6657	57.8525	6.15196	71.4576	105.598	2.5285	0.014952	1.12752	2.51907	17.2703	22.2806	1.26789	18.6304	26.3607	2.45551	71.0977	101.107
2.44861	37.5321	57.4517	6.17269	72.2121	105.563	2.53232	-0.240522	1.12642	2.51907	17.2703	22.2806	1.26789	18.3752	26.3607	2.4701	71.3021	101.721
2.45207	37.2755	57.4478	6.17615	72.0824	105.174	2.54747	-0.095645	0.795729	2.5265	17.2691	22.2768	1.26789	18.1201	26.3607	2.4701	71.0913	101.088
2.45552	37.2741	57.4438	6.1796	71.8251	105.169	2.54747	-0.095645	0.795729	2.53769	17.2672	22.2712	1.26789	17.865	26.3607	2.47736	71.3432	101.079
2.45898	37.5282	57.44	6.20034	71.4305	105.517	2.54747	0.159463	0.795729	2.53769	17.5223	22.2712	1.26789	18.1201	26.3607	2.48102	71.0865	101.074
2.46243	37.7822	57.436	6.2038	71.4286	105.511	2.54747	0.0506851	0.469395	2.53769	17.5223	22.2712	1.26789	18.1201	26.3607	2.48102	71.3416	101.074
2.46934	37.2689	57.4282	6.21762	71.1655	105.488	2.55129	0.0503272	0.468322	2.54137	17.5217	22.2693	1.27514	18.1188	26.3568	2.48102	71.3416	101.074
2.46934	37.9119	57.825	6.22108	70.9081	105.482	2.55512	-0.0963693	0.793556	2.54137	17.5217	22.2693	1.27514	18.3739	26.3568	2.48102	71.3416	101.074
2.47625	37.9093	57.8172	6.23145	71.0302	105.848	2.55887	-0.351833	0.792489	2.54513	17.8864	22.598	1.27514	18.3739	26.3568	2.48102	71.3416	101.074
2.47625	38.0417	58.2143	6.2349	71.5391	105.843	2.55887	-1.11716	0.792489	2.55631	17.4844	22.9229	1.27514	18.3739	26.3568	2.48828	71.3385	101.065
2.47625	37.7863	58.2144	6.24182	71.0244	105.831	2.56269	-1.11752	0.791403	2.55631	17.3742	22.5923	1.27514	18.1188	26.3568	2.49194	71.0818	101.06
2.48316	38.0391	58.2065	6.24527	71.6611	106.209	2.56269	-1.11752	0.791403	2.55631	17.264	22.2617	1.27514	18.6291	26.3568	2.49554	71.0802	101.055
2.48661	37.7823	58.2025	6.26601	71.6493	106.173	2.56651	-0.352557	0.790316	2.56	17.3736	22.5904	1.27514	18.6291	26.3568	2.50646	70.31	101.041
2.49698	37.6461	57.7937	6.26946	71.9028	106.168	2.58167	0.156223	0.78601	2.56	17.3736	22.5904	1.2788	18.6284	26.3549	2.50646	70.31	101.041
2.50395	37.6434	57.7858	6.27292	72.4116	106.162	2.58924	0.155506	0.783857	2.56375	17.2628	22.258	1.2788	18.6284	26.3549	2.51012	70.8186	101.036
2.50395	37.8988	57.7857	6.28675	72.4038	106.139	2.58924	0.155506	0.783857	2.56375	17.0077	22.258	1.2897	18.5208	26.0319	2.51012	70.8186	101.036
2.50395	37.6434	57.7857	6.29366	71.8891	106.127	2.58924	-0.0619569	0.131469	2.56375	17.1178	22.5885	1.28239	18.5221	26.0358	2.51738	71.0707	101.026
2.50395	37.8988	57.7858	6.30403	72.1387	106.876	2.59306	-0.610181	0.782771	2.57118	16.4962	22.2542	1.28239	18.5221	26.0358	2.51738	70.86	100.394
2.50395	37.8988	57.7856	6.30403	72.1387	106.876	2.59306	-0.794215	1.76131	2.57494	16.3854	21.9218	1.28605	17.7561	26.0339	2.52104	71.0691	101.022
2.51777	37.8936	57.7701	6.30748	72.1367	106.87	2.60064	-0.50218	1.10677	2.57494	16.3854	21.9218	1.2897	18.5208	26.0319	2.52104	71.0691	101.022
2.51777	38.149	57.7701	6.32822	71.8697	106.835	2.60064	-0.50218	1.10677	2.57869	17.1501	21.9199	1.30061	18.5188	26.0261	2.5283	71.0659	101.012
2.51777	38.149	57.7701	6.3455	71.7323	106.422	2.61204	-0.285861	1.75573	2.58237	17.0393	21.5876	1.3042	19.1341	26.3413	2.53556	70.9574	100.687
2.52468	37.5126	58.1592	6.3455	71.9876	106.422	2.61586	-0.286236	1.75461	2.58981	16.8178	20.923	1.3042	18.5182	26.0242	2.53922	71.0612	100.998
2.52468	37.891	57.7623	6.3455	71.7323	106.422	2.61586	-0.503639	1.1024	2.59356	16.8172	20.9212	1.3042	18.5182	26.0242	2.53922	70.9558	100.682
2.52468	38.0233	58.1592	6.35241	72.239	107.177	2.61586	-0.612341	0.776293	2.601	16.816	20.9175	1.3042	18.6239	26.3413	2.53922	70.9558	100.682
2.53159	38.2852	58.945	6.36278	72.2332	107.159	2.61961	-0.612696	0.775226	2.60475	17.0705	20.9157	1.3042	18.6239	26.3413	2.54648	70.3979	101.304
2.53159	38.2853	58.9451	6.37661	71.9701	107.136	2.61961	-0.867801	0.775226	2.60475	17.2907	21.5764	1.3042	18.6239	26.3413	2.54648	70.3979	101.304
2.53159	38.0207	58.1514	6.38352	71.8385	106.741	2.62344	-0.613058	0.77414	2.6085	17.2901	21.5746	1.30786	18.6232	26.3393	2.55015	71.1617	101.299
2.5385	38.2826	58.9371	6.39043	71.7072	105.581	2.62344	-0.613058	0.77414	2.6085	17.2901	21.5746	1.30786	18.6232	26.3393	2.561	70.3916	101.285
2.54195	38.2721	58.1395	6.40425	71.4441	105.558	2.64241	-0.614855	0.768749	2.61594	17.2889	21.5709	1.31145	18.3056	25.3863	2.561	70.9018	101.285
2.54541	38.2708	58.1356	6.41117	71.4402	105.546	2.64241	-0.359746	0.768749	2.62337	16.7774	21.5671	1.31145	18.3056	25.3863	2.561	71.157	101.285
2.54886	38.2695	58.1316	6.41462	72.0763	106.688	2.64623	-0.360108	0.767663	2.61594	16.5235	21.5709	1.31145	18.3056	25.3863	2.561	71.4121	101.285
2.54886	38.2695	58.1317	6.41808	72.2019	107.065	2.64999	-0.360464	0.766597	2.62337	16.5223	21.5671	1.31511	18.7276	26.6524	2.57559	71.1059	101.898
2.55232	38.2682	58.1276	6.4319	71.6833	107.042	2.64999	-0.360464	0.766597	2.62712	16.5217	21.5653	1.31511	18.4725	26.6524	2.57925	71.1043	101.893
2.56274	38.132	57.7191	6.44918	72.0567	106.63	2.66138	-0.616652	0.763359	2.63081	16.521	21.5634	1.31511	18.7276	26.6524	2.57925	71.1043	101.893
2.5662	37.8753	57.7152	6.4561	72.0528	106.618	2.66896	-0.61737	0.761206	2.63081	16.521	21.5634	1.31511	18.6219	26.3354	2.58284	71.1027	101.888
2.5662	37.8753	57.7151	6.4561	72.0528	106.618	2.66896	-0.61737	0.761206	2.63831	16.5198	21.5597	1.31877	18.6213	26.3335	2.58651	71.1011	101.883
2.57311	38.0049	58.104	6.45955	72.0509	106.612	2.67278	-0.617731	0.760121	2.63831	16.5198	21.5597	1.31877	18.6213	26.3335	2.58651	71.1011	101.883
2.57656	37.4929	58.1001	6.47338	71.7882	105.824	2.67661	-0.618093	0.759035	2.63831	16.5198	21.5597	1.31877	18.6213	26.3335	2.58651	70.5909	101.883
2.58002	38.0023	58.0962	6.48029	72.0392	106.577	2.67661	-0.618093	0.759035	2.64575	15.6431	21.2257	1.32968	18.725	26.6446	2.5901	70.4841	101.563
2.58002	37.7469	58.0962	6.4872	71.9074	106.948	2.67661	-0.471618	0.433133	2.64943	16.1527	21.2239	1.32602	18.7256	26.6465	2.5901	70.3788	101.247
2.58693	37.7443	58.0883	6.49066	72.1608	106.942	2.67661	-0.471618	0.433133	2.66062	16.0059	21.5485	1.32602	18.7256	26.6465	2.5901	70.3788	101.247
2.58693	37.9997	58.0883	6.50794	72.4058	107.677	2.67661	-0.471618	0.433133	2.66437	16.0052	21.5467	1.32968	18.9363	27.2785	2.59377	70.3772	101.242
2.59384	38.5078	58.0804	6.5114	72.6592	107.671	2.67661	-0.726727	0.433133	2.66437	16.1153	21.8769	1.32968	18.725	26.6446	2.59743	70.3756	101.237
2.59384	37.8648	57.6838	6.51485	72.7853	107.283	2.68036	-0.727078	0.43208	2.66437	16.1153	21.8769	1.32968	18.9363	27.2785	2.60469	70.3725	101.228
2.59729	37.8635	57.6798	6.5425	72.6422	106.854	2.688	-0.982899	0.429934	2.67181	16.114	21.8731	1.33327	18.9356	27.2765	2.60835	70.3709	101.223
2.60074	37.8622	57.6759	6.5425	72.7695	107.236	2.69558	-1.23872	0.427807	2.67556	15.8933	21.2109	1.34052	18.6174	26.3218	2.61561	70.3677	101.214
2.6042	37.8609	57.6721	6.54596	72.7676	107.23	2.69933	-0.983959	0.426754	2.67556	15.7833	20.8808	1.34783	18.6161	26.3179	2.61921	70.3661	101.209
2.60765	38.124	58.4613	6.56324	72.7578	107.2	2.70316	-1.23943	0.425681	2.67556	15.5632	20.2205	1.34783	18.6161	26.3179	2.61921	70.4713	101.525
2.60765	38.124	58.4612	6.56669	72.5004	107.195	2.71073	-1.24014	0.423555	2.67556	15.5632	20.2205	1.34783	18.6161	26.3179	2.61921	70.5766	101.84
2.60765	38.124	58.4613	6.56669	72.1171	107.577	2.71073	-0.72992	0.423555	2.68299	15.782	20.8771	1.34417	18.3616	26.3199	2.62653	70.5733	101.831
2.61111	38.1227	58.4574	6.58052	72.62	107.553	2.71455	-0.621686	0.748256	2.68299	15.782	20.8771	1.34052	18.4679	26.6387	2.63013	70.9768	101.51
2.61808	38.12	58.4494	6.58743	72.616	107.541	2.72213	-0.622403	0.746105	2.69418	15.5251	20.8716	1.34052	18.4679	26.6387	2.63379	70.8699	101.19
2.62154	38.1187	58.4454	6.5978	72.6101	107.524	2.72971	-0.112904	0.743953	2.70162	16.5443	20.8679	1.34417	18.4673	26.6368	2.64105	70.8668	101.18
2.62499	37.4745	58.045	6.61162	72.6022	107.5	2.73353	-0.113265	0.742868	2.70162	16.5443	20.8679	1.34783	18.7217	26.6348	2.64831	70.8636	101.171
2.62845	37.9839	58.0411	6.61854	72.8537	107.488	2.73735	-0.623844	0.741782	2.70162	16.0341	20.8679	1.35142	18.7211	26.6329	2.64831	70.548	100.224
2.63536	37.9813	58.0332	6.62199	72.5963	107.482	2.73735	-0.113627	0.741782	2.70537	16.0335	20.8661	1.35142	17.9557	26.6329	2.65197	70.862	101.166
2.64226	37.8465	57.6288	6.62545	72.8498	107.476	2.74493	-0.114344	0.739631	2.70905	16.0329	20.8643	1.35142	18.7211	26.6329	2.65923	70.6485	100.525
2.64572	37.8452	57.6249	6.63236	72.8459	107.465	2.74493	-0.114344	0.739631	2.7128	15.412	20.5324	1.35142	17.9557	26.6329	2.65923	70.8588	101.156
2.64572	37.8452	57.625	6.64964	72.5806	107.435	2.74493	-0.114344	0.739631	2.72399	15.7004	19.867	1.34783	17.9564	26.6348	2.66289	70.6469	100.521
2.64917	37.8439	57.621	6.6531	72.5786	107.429	2.74493	-0.114344	0.739631	2.72399	15.1902	19.867	1.34783	18.4666	26.6348	2.66289	70.8572	101.152
2.65608	37.8413	57.6132	6.66001	72.5748	107.418	2.74875	-0.369814	0.738545	2.72399	15.1902	19.867	1.34783	18.4666	26.6348	2.66656	71.3659	101.147
2.65608	37.8501	58.4059	6.68075	72.1804	107.001	2.74875	-0.261261	1.06421	2.72399	15.5202	20.8569	1.36233	18.464	26.627	2.67015	71.3644	101.142
2.65954	37.8489	58.4021	6.68766	72.1755	107.752	2.75632	-0.517095	1.06203	2.73143	15.519	20.8533	1.36599	18.4633	26.625	2.67741	71.3612	101.133
2.65954	37.8488	58.402	6.68766	72.1755	107.752	2.76772	-0.626719	0.733158	2.73518	15.5184	20.8514	1.36958	18.4627	26.6231	2.68107	70.8493	101.128
2.66299	37.8475	58.398	6.70494	72.1657	107.722	2.76772	-0.91987	1.38435	2.73886	15.4078	20.5197	1.36958	18.4627	26.6231	2.68474	70.8477	101.123
2.6699	37.8449	58.3901	6.7084	72.419	107.717	2.76772	-0.626719	0.733158	2.74262	15.6974	19.858	1.36958	18.7795	27.5736	2.68833	70.8461	101.118
2.67688	38.353	58.3822	6.7084	72.1637	107.717	2.76772	-0.626719	0.733158	2.74637	15.6968	19.8562	1.37324	18.7789	27.5716	2.692	70.8445	101.114
2.68033	38.3517	58.3782	6.71531	72.6704	107.705	2.76772	-0.735251	0.407562	2.75005	15.296	20.1843	1.37324	18.8228	26.9379	2.692	70.9497	101.429
2.68033	38.3517	58.3783	6.73259	72.9161	107.675	2.7753	-0.73596	0.405436	2.7538	15.1503	20.5124	1.37324	19.034	27.5716	2.692	71.0997	101.114
2.68033	38.4838	58.7745	6.73605	72.9141	107.669	2.77912	-0.736317	0.404363	2.75756	15.2596	20.8404	1.37324	19.333	26.9379	2.69566	71.0981	101.109
2.68033	38.2284	58.7745	6.7395	72.9121	107.663	2.77912	-0.736317	0.404363	2.76499	15.2584	20.8367	1.37324	19.2274	26.6211	2.70292	71.0949	101.099
2.69069	38.2245	58.7627	6.76369	72.8983	107.622	2.77912	-0.736317	0.404363	2.76499	14.5283	20.177	1.3769	18.9716	26.6191	2.70651	71.3485	101.094
2.69069	38.2245	58.7627	6.77061	72.8943	107.61	2.79427	-0.992839	0.400113	2.77243	15.1472	20.5032	1.3769	18.4614	26.6191	2.71018	71.3469	101.09
2.69069	38.4885	59.5547	6.77406	73.0193	107.985	2.80185	-0.95543	-0.252976	2.77243	15.1472	20.5032	1.38414	18.504	25.9817	2.7211	71.1921	101.391
2.6976	38.2218	58.7547	6.78098	73.652	109.117	2.80185	-0.95543	-0.252976	2.77618	15.1466	20.5014	1.38414	18.504	25.9817	2.7211	71.1921	101.391
2.70451	38.0871	58.3507	6.78098	73.652	109.117	2.80567	-0.70067	-0.254023	2.78361	15.2553	20.8276	1.38414	18.504	25.9817	2.7211	71.1921	101.391
2.70451	38.3425	58.3506	6.7948	73.644	109.093	2.80185	-0.95543	-0.252976	2.78361	15.2553	20.8276	1.3878	18.5034	25.9797	2.7211	70.9369	101.391
2.70451	38.3425	58.3506	6.80517	73.3841	108.313	2.80567	-0.483691	0.396915	2.78737	15.2547	20.8257	1.3878	18.5034	25.9797	2.72476	70.9353	101.386
2.71142	38.5953	58.3427	6.81899	72.6114	107.528	2.80567	-0.228583	0.396915	2.79105	15.2541	20.8239	1.39505	18.4581	26.6093	2.72476	70.9353	101.386
2.71487	38.3386	58.3389	6.82245	72.6094	107.522	2.81325	-0.229291	0.39479	2.79105	15.5092	20.8239	1.39505	18.0535	26.9261	2.73562	70.9305	101.372
2.71487	38.0831	58.3387	6.83973	72.0889	107.492	2.82082	-0.740217	0.392665	2.7948	15.2888	20.1626	1.39505	18.0535	26.9261	2.74294	70.9273	101.362
2.72178	38.0805	58.3309	6.84664	72.4686	107.099	2.82465	-0.740574	0.391593	2.80599	15.0318	20.1571	1.39505	18.0535	26.9261	2.74654	70.9258	101.357
2.72178	38.0805	58.3308	6.84664	72.4687	107.099	2.83222	-0.741282	0.389468	2.80967	15.5415	20.1553	1.39505	18.0535	26.9261	2.74654	70.9258	101.357
2.73221	38.0766	58.319	6.85701	72.7166	107.843	2.83987	-0.741997	0.387323	2.81343	15.431	19.8238	1.39505	18.8188	26.9261	2.74654	70.9258	101.357
2.73221	38.2086	58.7151	6.86392	73.095	108.212	2.83987	-0.741997	0.387323	2.81718	14.9201	19.822	1.4023	18.8175	26.9222	2.74654	70.6707	101.357
2.73567	38.4627	58.7111	6.87429	73.0891	108.194	2.84744	-0.487596	0.385199	2.82086	14.9195	19.8202	1.4023	18.7119	26.6054	2.74654	70.9258	101.357
2.73567	38.2073	58.7111	6.88466	73.4655	108.557	2.8512	-0.487947	0.384146	2.82086	14.9195	19.8202	1.4023	18.4568	26.6054	2.75386	70.2623	101.663
2.73567	38.2073	58.7111	6.88812	73.4635	108.551	2.85502	-0.488305	0.383074	2.81343	14.6656	19.8238	1.40955	18.7106	26.6015	2.75386	70.2623	101.663
2.74258	38.2046	58.7032	6.90194	73.5841	108.147	2.85884	-0.488662	0.382002	2.81718	14.9201	19.822	1.40955	18.4555	26.6015	2.76472	70.2576	101.649
2.74258	38.3365	59.0989	6.9054	73.5821	108.141	2.85884	-0.743771	0.382002	2.81718	14.9201	19.822	1.40955	18.5611	26.9182	2.76472	71.5332	101.649
2.75294	38.3326	59.087	6.9054	73.5821	108.141	2.86259	-0.744122	0.380949	2.81718	14.1548	19.822	1.41321	18.5604	26.9163	2.77204	70.5094	101.639
2.75639	38.3313	59.0831	6.92268	73.3168	108.111	2.86259	-0.744122	0.380949	2.8358	14.9171	19.813	1.41321	18.5604	26.9163	2.77564	71.5284	101.634
2.75639	38.3312	59.083	6.9365	73.3089	108.088	2.86642	-0.48937	0.379877	2.83948	14.9166	19.8113	1.41321	18.5604	26.9163	2.77564	71.4233	101.319
2.77021	38.0705	59.0671	6.94342	73.4317	108.456	2.87781	-0.745545	0.376681	2.84324	14.916	19.8095	1.41321	18.8155	26.9163	2.77564	71.5284	101.634
2.77021	38.0705	59.0671	6.95033	73.4278	108.444	2.87781	-0.745545	0.376681	2.84699	14.5504	19.478	1.43136	19.0674	26.9064	2.7793	70.5063	101.629
2.77021	38.0705	59.0671	6.95724	73.5506	108.813	2.88157	-0.745895	0.375629	2.84699	14.8055	19.478	1.43136	19.0674	26.9064	2.78656	71.5236	101.62
2.77367	38.3246	59.0632	6.96415	73.5467	108.801	2.88157	-0.78419	1.02606	2.85067	14.8049	19.4763	1.43136	19.0674	26.9064	2.78656	71.0133	101.62
2.77712	38.7106	59.455	6.96761	73.6733	108.415	2.88539	-1.00136	0.374557	2.85442	14.8043	19.4745	1.42412	18.8576	26.277	2.78656	70.7582	101.62
2.77712	38.7106	59.455	6.98143	73.7921	108.771	2.88921	-0.784922	1.02386	2.85811	15.0234	20.1318	1.42412	18.3474	26.277	2.79022	71.0117	101.615
2.78403	38.708	59.447	6.9918	74.0413	108.753	2.89297	-0.785281	1.02279	2.86561	15.0222	20.1282	1.42412	18.3474	26.277	2.79748	71.0085	101.605
2.78403	38.708	59.4471	6.99871	74.0374	108.741	2.89297	-0.785281	1.02279	2.86561	14.2923	19.4691	1.42412	18.8136	26.9103	2.80115	70.7518	101.601
2.79101	38.4499	59.439	6.99871	74.1642	109.121	2.89297	-0.746961	0.372432	2.8693	14.2917	19.4674	1.42412	18.8136	26.9103	2.80474	70.6452	101.281
2.79446	38.4486	59.435	7.00562	74.1603	109.11	2.90819	-0.895113	0.693291	2.8768	14.2905	19.4638	1.42771	18.5578	26.9084	2.8084	70.5385	100.961
2.79446	38.4485	59.4349	7.0229	74.4057	109.08	2.90819	-0.748383	0.368165	2.8768	14.2905	19.4638	1.44227	18.8103	26.9005	2.8084	70.5385	100.961
2.79791	38.4472	59.431	7.0229	73.7664	109.46	2.91194	-0.748734	0.367112	2.8768	14.1807	19.1343	1.44593	18.9152	27.2151	2.8084	70.5385	100.961
2.80482	38.3127	59.0273	7.03327	73.6336	109.062	2.91576	-0.640725	0.691141	2.88048	14.6903	19.1325	1.44593	18.66	27.2151	2.81207	70.4319	100.641
2.80828	37.8006	59.0233	7.0471	73.7524	109.418	2.91194	-0.640363	0.692226	2.88048	14.1801	19.1325	1.44227	19.171	27.2171	2.81566	70.6855	100.636
2.81519	37.798	59.0153	7.05401	73.6216	109.026	2.91576	-0.857458	0.0409402	2.88792	14.1789	19.129	1.44593	19.1703	27.2151	2.82292	70.022	100.942
2.81519	38.5641	59.0154	7.06438	73.489	108.628	2.91576	-0.857458	0.0409402	2.89911	14.1771	19.1237	1.44593	18.8537	26.2654	2.83025	70.529	100.932
2.81864	38.5628	59.0114	7.0782	73.7365	108.604	2.91959	-0.857811	0.0398813	2.90286	14.1766	19.1219	1.44593	18.5986	26.2654	2.83025	70.424	100.617
2.81864	38.6947	59.4071	7.08166	73.7345	108.598	2.93098	-0.603755	0.0367239	2.90286	14.1766	19.1219	1.44593	18.5986	26.2654	2.83384	70.6324	101.243
2.81864	38.6947	59.4072	7.09549	73.7265	108.574	2.93098	-0.603755	0.0367239	2.90286	13.4112	19.1219	1.44593	18.3435	26.2654	2.84477	70.4775	101.543
2.82555	39.2028	59.3992	7.09894	73.8511	108.948	2.93474	-0.604101	0.0356843	2.90286	13.4112	19.1219	1.44227	18.5552	26.9005	2.84477	70.6276	101.228
2.82555	38.692	59.3991	7.09894	73.4671	109.328	2.94996	-0.24207	0.356454	2.91405	14.065	18.7873	1.44227	18.6607	27.2171	2.84477	70.1626	100.598
2.829	38.6907	59.3951	7.11623	73.4571	109.298	2.94996	-0.24207	0.356454	2.91773	13.8093	18.7855	1.44227	18.6607	27.2171	2.84843	70.161	100.594
2.83246	38.6894	59.3912	7.13005	73.9598	109.274	2.95371	-0.242421	0.355402	2.92148	14.0638	18.7837	1.44593	18.66	27.2151	2.84843	70.4161	100.594
2.83591	38.688	59.3872	7.13351	73.7024	109.268	2.95371	-0.497529	0.355402	2.92523	14.0988	18.1234	1.45677	18.7636	27.5257	2.84843	70.4161	100.594
2.84282	38.6854	59.3792	7.14042	73.9538	109.256	2.95371	-0.752638	0.355402	2.92523	13.8437	18.1234	1.45677	18.8077	26.8927	2.85569	70.4129	100.584
2.8498	38.6827	59.3711	7.15079	73.6947	108.479	2.95753	-1.0081	0.354331	2.92892	14.3178	18.7802	1.46409	19.0615	26.8887	2.87387	70.9749	101.505
2.85325	38.5495	58.9715	7.1577	73.6908	108.467	2.96511	-0.862014	0.0272723	2.92892	14.3178	18.7802	1.46409	18.8063	26.8887	2.87387	70.7198	101.505
2.85325	38.5495	58.9716	7.16461	73.4313	108.455	2.96893	-0.862367	0.0262136	2.94011	13.8058	18.775	1.47134	18.9105	27.2013	2.87753	70.7182	101.5
2.85671	38.5482	58.9676	7.17843	73.4234	108.431	2.97651	-0.863066	0.0241157	2.94386	13.7696	19.4317	1.46768	18.9112	27.2033	2.87753	70.7182	101.5
2.85671	38.68	59.3632	7.1888	73.4174	108.413	2.97269	-1.11782	0.0251743	2.94386	13.7696	19.4317	1.46768	18.401	27.2033	2.87753	70.8232	101.815
2.86362	38.1666	59.3552	7.1888	73.6705	109.172	2.98408	-1.11887	0.0220178	2.94386	13.7696	19.4317	1.47134	18.4003	27.2013	2.88479	70.82	101.805
2.86362	38.1666	59.3553	7.19917	73.6645	109.154	2.98791	-1.11922	0.0209593	2.94386	13.5501	18.7732	1.47134	18.6113	27.8343	2.88479	70.715	101.49
2.86707	38.676	59.3512	7.20263	73.789	109.528	2.98791	-1.11922	0.0209593	2.94386	12.7848	18.7732	1.47134	18.4003	27.2013	2.88479	70.715	101.49
2.86707	38.676	59.3512	7.21299	74.5491	109.51	2.98791	-0.864119	0.0209593	2.95504	13.5483	18.7679	1.47134	18.4003	27.2013	2.88845	70.7134	101.486
2.88089	38.5389	58.9398	7.21299	74.2937	109.51	2.98791	-0.864119	0.0209593	2.96623	13.9471	18.4335	1.46768	18.4451	26.5702	2.88845	70.7134	101.486
2.88434	38.5376	58.9358	7.23027	74.5391	109.48	2.99173	-0.864471	0.0199008	2.96992	13.9465	18.4317	1.46768	18.19	26.5702	2.89937	70.7086	101.471
2.88434	38.6694	59.3312	7.23719	74.5351	109.468	2.99548	-1.08137	-0.630806	2.96992	14.7118	18.4317	1.46768	18.4451	26.5702	2.90297	70.7071	101.466
2.88434	38.5376	58.9359	7.24755	74.2737	109.45	3.00306	-1.08206	-0.632852	2.96992	14.6021	18.1026	1.48224	18.6976	26.5624	2.91023	70.7039	101.457
2.89125	38.6667	59.3233	7.24755	74.1473	109.071	3.00306	-1.08206	-0.632852	2.96992	13.0714	18.1026	1.48224	18.6976	26.5624	2.91023	70.7039	101.457
2.89125	38.6667	59.3233	7.26829	74.2617	109.414	3.00688	-0.974135	-0.30909	2.96992	13.0714	18.1026	1.48949	18.6963	26.5585	2.90663	70.7055	101.462
2.89471	38.6654	59.3194	7.27175	74.2597	109.408	3.0107	-0.974484	-0.310136	2.98486	13.3242	18.0956	1.48949	18.6963	26.5585	2.91023	70.7039	101.457
2.89816	38.4087	59.3153	7.28212	74.1274	109.011	3.01828	-0.866922	0.0125496	2.98486	13.0691	18.0956	1.48949	18.6963	26.5585	2.91023	70.7039	101.457
2.90514	38.5378	59.7027	7.28212	74.38	109.769	3.01828	-0.866922	0.0125496	2.98486	13.4339	18.4247	1.48949	18.6963	26.5585	2.92115	70.6991	101.443
2.90514	38.5378	59.7026	7.2994	74.3699	109.739	3.0221	-1.37749	0.0114912	2.98854	13.4334	18.423	1.48949	19.1624	27.1914	2.92848	70.6959	101.433
2.91204	38.5351	59.6947	7.2994	74.37	109.739	3.0221	-1.6326	0.0114912	2.98854	13.4334	18.423	1.49315	18.9066	27.1894	2.93207	70.6943	101.428
2.9155	38.5338	59.6907	7.31668	74.8707	109.709	3.03343	-1.88876	0.00835486	2.99604	13.1771	18.4195	1.49674	19.0114	27.5038	2.93574	70.4829	100.794
2.91895	38.5325	59.6867	7.31668	74.9971	110.088	3.03725	-1.88911	0.00729661	2.99973	13.0668	18.0887	1.5004	19.0107	27.5018	2.93933	70.4813	100.789
2.91895	38.5325	59.6867	7.33396	74.8607	109.679	3.03725	-1.88911	0.00729661	2.99973	12.9571	17.7597	1.50406	19.0101	27.4998	2.93933	70.4813	100.789
2.92586	38.5298	59.6787	7.34087	73.9616	110.046	3.03725	-1.88911	0.00729661	3.00348	12.9566	17.7579	1.50406	19.221	28.1326	2.94299	70.3749	100.47
2.92932	38.5285	59.6747	7.34433	73.9595	110.039	3.04108	-1.88946	0.00623838	3.00348	12.8469	17.4289	1.50406	18.7108	28.1326	2.94299	70.1198	100.47
2.93277	38.5271	59.6707	7.3547	74.0798	110.4	3.05247	-1.99873	-0.32156	3.01091	12.9554	17.7545	1.50406	19.0101	27.4998	2.94299	70.4344	101.414
2.93277	38.5271	59.6706	7.35816	74.4622	110.015	3.05247	-1.99873	-0.32156	3.01835	12.9543	17.7511	1.50765	18.9652	28.1306	2.94666	70.3733	100.465
2.93623	38.5258	59.6667	7.38235	74.4481	109.973	3.05623	-1.48885	-0.322586	3.01835	13.2094	17.7511	1.50765	18.4992	27.4979	2.96117	70.6815	101.39
2.93968	38.7799	59.6627	7.3858	74.8277	110.346	3.06005	-1.38099	0.000986047	3.0221	13.2088	17.7493	1.50765	18.7543	27.4979	2.96117	70.6815	101.39
2.94313	38.7785	59.6586	7.39963	74.5643	110.322	3.0638	-1.12623	-5.28133e-05	3.0221	12.9537	17.7493	1.50765	18.7543	27.4979	2.96484	70.6799	101.385
2.95004	39.2866	59.6506	7.39963	74.4381	109.943	3.07145	-1.12693	-0.00216895	3.03697	12.9514	17.7425	1.51131	18.7536	27.4959	2.96843	70.4232	101.38
2.95004	39.1549	59.2555	7.39963	74.8167	111.079	3.07145	-1.12693	-0.00216895	3.03697	13.0611	18.0714	1.51856	18.7523	27.4919	2.96843	69.913	101.38
2.95004	39.2867	59.6507	7.41691	74.8065	111.048	3.07902	-1.12763	-0.00426576	3.03697	12.4054	18.4003	1.51856	19.2626	27.4919	2.9721	69.9114	101.375
2.9535	39.4169	60.0414	7.42036	74.8045	111.042	3.08285	-0.911624	0.643758	3.03697	13.1707	18.4003	1.52221	19.2619	27.4899	2.9721	69.9114	101.375
2.96047	39.1588	60.0334	7.42728	75.182	111.409	3.08285	-1.12798	-0.00532375	3.04448	12.7689	18.7257	1.52221	19.051	26.8572	2.97576	69.9098	101.371
2.96393	38.9021	60.0294	7.43419	75.178	111.397	3.08285	-0.803444	0.968299	3.04448	12.7689	18.7257	1.52221	18.7958	26.8572	2.97576	69.9098	101.371
2.96393	39.1575	60.0294	7.44456	74.5382	110.243	3.0866	-0.803802	0.967223	3.05191	12.9491	17.7356	1.52221	19.2619	27.4899	2.98302	70.4168	101.361
2.96738	38.9008	60.0254	7.46875	74.0133	110.201	3.09042	-1.6389	-0.00742043	3.05191	12.8395	17.4067	1.52946	19.0054	27.4859	2.98668	70.4152	101.356
2.97429	38.8981	60.0173	7.47221	74.0113	110.195	3.09418	-1.12903	-0.00845912	3.05567	12.8389	17.405	1.52946	19.0054	27.4859	2.99028	70.4136	101.351
2.97429	38.7665	59.6225	7.47566	73.8832	109.81	3.09418	-1.2372	-0.332962	3.05567	12.8389	17.405	1.52946	19.2163	28.1185	2.99754	71.1758	101.342
2.97775	38.7652	59.6186	7.47912	73.8812	109.805	3.10557	-1.74846	-0.336078	3.05567	12.8389	17.405	1.52946	19.0054	27.4859	3.0012	70.5591	101.023
2.9812	38.8954	60.0093	7.4964	74.6372	109.774	3.11322	-1.23893	-0.338168	3.06678	12.327	17.3999	1.53312	18.9605	28.1165	3.00486	70.5575	101.018
2.98811	38.8927	60.0013	7.49985	74.8873	110.525	3.11697	-1.13113	-0.0147678	3.07054	12.3264	17.3982	1.53312	18.9605	28.1165	3.00846	70.5559	101.013
2.99156	38.7598	59.6026	7.50331	74.1192	110.518	3.11697	-1.13113	-0.0147678	3.07797	12.8355	17.3948	1.53671	18.9598	28.1145	3.01212	70.6591	101.323
3.00193	38.5004	59.5906	7.51713	74.1111	110.494	3.12455	-1.13183	-0.0168641	3.08916	12.8338	17.3897	1.53671	18.8544	27.7982	3.01212	70.6591	101.323
3.00193	38.5004	59.5906	7.5275	74.1051	110.476	3.12837	-0.62197	-0.0179218	3.08916	12.8338	17.3897	1.53671	18.8544	27.7982	3.01578	70.612	101.947
3.00193	38.7558	59.5906	7.53787	74.099	110.458	3.12837	-0.62197	-0.0179218	3.09291	12.8332	17.3879	1.54037	18.8537	27.7962	3.01578	70.612	101.947
3.00538	39.2653	59.5866	7.54479	74.3503	110.446	3.12837	-1.13218	-0.0179218	3.0966	12.8327	17.3862	1.54037	18.7483	27.4799	3.02664	70.8623	101.932
3.00538	39.1337	59.1917	7.5517	74.4724	110.812	3.12837	-1.24031	-0.34231	3.0966	12.8327	17.3862	1.54396	18.7477	27.478	3.02664	70.3977	101.304
3.01229	39.131	59.1837	7.55516	74.4704	110.806	3.13219	-0.946698	-0.992107	3.10035	12.8321	17.3845	1.54396	18.4925	27.478	3.02664	70.7576	101.618
3.01574	38.882	59.9691	7.56552	74.5903	111.166	3.13977	-0.986247	-0.345426	3.10035	12.8321	17.3845	1.54762	18.4919	27.4759	3.03756	70.7527	101.604
3.01927	38.6175	59.1755	7.58281	74.4542	110.757	3.13977	-0.986247	-0.345426	3.10035	12.577	17.3845	1.54762	18.4919	27.4759	3.03756	70.4976	101.604
3.01927	38.6175	59.1757	7.58626	74.8334	111.129	3.14735	-0.986937	-0.347497	3.10035	12.577	17.3845	1.55128	19.2566	27.4739	3.04122	70.3913	101.284
3.01927	38.8806	59.965	7.59663	74.9532	111.488	3.14735	-0.986937	-0.347497	3.1041	12.5764	17.3828	1.54762	18.7913	26.8434	3.04489	70.7495	101.594
3.02272	39.1348	59.9612	7.60354	75.2045	111.476	3.16257	-0.988324	-0.351657	3.1041	12.5764	17.3828	1.54762	19.0021	27.4759	3.04489	70.7495	101.594
3.02963	39.132	59.953	7.607	75.2025	111.47	3.16257	-0.733215	-0.351657	3.11154	11.81	17.3794	1.55128	19.0014	27.4739	3.04848	70.4337	100.646
3.02963	39.1321	59.9531	7.61737	75.1964	111.452	3.17014	-0.733905	-0.353727	3.12272	12.5736	17.3743	1.55487	19.0008	27.472	3.0594	70.7431	101.575
3.02963	39.3875	59.9531	7.62082	75.1944	111.446	3.17014	-0.950071	-1.00222	3.12641	12.573	17.3726	1.55487	18.7457	27.472	3.06307	70.7415	101.57
3.03654	39.1294	59.9451	7.6381	75.1842	111.415	3.17396	-1.49958	-0.354772	3.12641	11.8077	17.3726	1.55487	18.7457	27.472	3.06307	70.7415	101.57
3.04345	38.8713	59.937	7.64502	75.1802	111.403	3.17396	-1.49958	-0.354772	3.13391	12.827	17.3692	1.55487	18.7457	27.472	3.06307	70.4864	101.57
3.05381	38.8673	59.925	7.64847	75.304	111.775	3.18529	-1.39254	-0.0336699	3.13391	12.6079	16.712	1.56218	18.7443	27.468	3.06666	70.4848	101.565
3.05726	38.8659	59.9209	7.6623	75.2958	111.75	3.18529	-1.39254	-0.0336699	3.13759	12.3162	17.3675	1.56218	18.6389	27.1518	3.07399	70.5273	100.927
3.05726	38.8659	59.9209	7.66921	75.0402	110.983	3.18912	-1.64801	-0.0347273	3.14135	12.3156	17.3657	1.56218	18.8497	27.7842	3.07399	70.5273	100.927
3.05726	38.7345	59.5265	7.68303	75.0321	110.959	3.19294	-1.75642	-0.359957	3.1451	12.3151	17.364	1.56943	18.8484	27.7802	3.07758	70.5257	100.922
3.05726	38.6029	59.1318	7.68994	75.2834	110.946	3.19294	-2.01153	-0.359957	3.1451	12.0599	17.364	1.56943	18.8484	27.7802	3.08851	71.0312	100.908
3.06417	38.6002	59.1238	7.6934	75.0259	110.94	3.19669	-1.75676	-0.360983	3.15253	12.0588	17.3606	1.57668	18.9968	27.46	3.08851	71.1359	101.222
3.06763	38.5989	59.1198	7.70031	75.0219	110.928	3.20051	-1.75711	-0.362027	3.15622	12.0582	17.3589	1.57668	19.2076	28.0923	3.09217	70.7287	101.531
3.0746	38.5962	59.1118	7.7245	74.6265	110.508	3.20434	-1.50234	-0.363072	3.15622	11.9487	17.0304	1.57668	19.1022	27.7762	3.09217	70.4736	101.531
3.0746	38.9832	59.5064	7.73142	75.0037	110.874	3.20434	-1.50234	-0.363072	3.16741	11.947	17.0253	1.57668	19.1022	27.7762	3.09217	70.7287	101.531
3.08151	39.3674	59.8928	7.73142	74.8779	110.496	3.21191	-0.992819	-0.365142	3.16741	11.947	17.0253	1.57668	19.1022	27.7762	3.09576	70.7271	101.527
3.08151	39.3674	59.8928	7.73487	74.8759	110.49	3.21191	-1.24792	-0.365142	3.17116	11.9465	17.0236	1.57668	18.8471	27.7762	3.09943	70.7255	101.522
3.08151	39.2435	60.2874	7.74178	74.8718	110.478	3.21567	-1.24827	-0.366167	3.17116	11.9465	17.0236	1.57668	18.8471	27.7762	3.09943	70.5161	100.894
3.08497	38.9868	60.2834	7.75907	74.8617	110.448	3.21949	-1.24861	-0.367211	3.17491	11.8003	17.3504	1.58759	19.1002	27.7702	3.09943	70.5161	100.894
3.08497	38.9868	60.2834	7.75907	74.8617	110.448	3.22706	-1.2493	-0.369281	3.17859	11.7997	17.3487	1.58759	19.1002	27.7702	3.11395	70.5098	100.875
3.08497	38.9868	60.2834	7.76944	74.8556	110.43	3.23089	-1.24965	-0.370326	3.18235	12.0543	17.347	1.58759	18.8451	27.7702	3.12127	70.7159	101.493
3.09533	38.9827	60.2713	7.78326	75.0989	111.159	3.23089	-1.24965	-0.370326	3.19353	11.7974	17.3419	1.59125	19.6097	27.7681	3.12127	70.5065	100.865
3.10569	38.9787	60.2593	7.78326	75.3542	111.159	3.23089	-1.50476	-0.370326	3.19722	11.7969	17.3402	1.59484	19.6091	27.7662	3.12853	70.4576	101.483
3.10915	38.9774	60.2552	7.79709	75.2206	110.758	3.23089	-1.24965	-0.370326	3.19722	11.9425	17.0118	1.59484	18.8437	27.7662	3.12487	70.4592	101.488
3.1126	38.976	60.2511	7.80746	75.0847	111.117	3.23471	-1.25	-0.37137	3.19722	11.9425	17.0118	1.59484	18.9491	28.0823	3.12487	70.4592	101.488
3.1126	38.8445	59.8567	7.81437	74.955	110.728	3.24604	-1.50614	-0.374465	3.2084	11.9408	17.0067	1.59484	18.8437	27.7662	3.12487	70.4592	101.488
3.1126	38.8445	59.8567	7.82128	74.951	110.716	3.25368	-1.50684	-0.376553	3.21216	12.4505	17.005	1.59484	18.8437	27.7662	3.12853	69.9474	101.483
3.11951	38.5865	59.8487	7.83165	74.9449	110.697	3.25368	-1.50684	-0.376553	3.21216	11.6119	16.02	1.59484	18.3335	27.7662	3.12853	70.7127	101.483
3.12297	38.5851	59.8447	7.83511	75.1984	110.692	3.25744	-1.50718	-0.377578	3.21584	12.1216	16.0184	1.59484	18.3335	27.7662	3.14305	70.7063	101.464
3.12642	39.1021	60.6295	7.84893	75.1901	110.667	3.26126	-1.50753	-0.378623	3.21216	11.6119	16.02	1.59484	18.7384	27.4501	3.15037	70.7031	101.455
3.12642	39.1022	60.6296	7.8593	75.946	111.402	3.26126	-1.50753	-0.378623	3.21959	11.5746	16.6733	1.59484	18.8437	27.7662	3.15037	70.448	101.455
3.12642	38.8392	59.8407	7.86621	75.8164	111.013	3.27266	-1.29263	0.266075	3.23078	11.5729	16.6683	1.613	18.8404	27.7562	3.15763	70.4448	101.445
3.1403	38.9653	60.2189	7.87658	75.9358	111.371	3.27641	-1.29298	0.265024	3.23078	11.5729	16.6683	1.613	19.0955	27.7562	3.16129	70.4432	101.44
3.1403	39.3446	59.8245	7.88349	75.9318	111.359	3.27641	-1.50891	-0.382761	3.23078	11.5729	16.6683	1.613	18.9457	28.0722	3.16129	70.4432	101.44
3.14376	39.3432	59.8204	7.89386	75.285	111.718	3.28406	-1.5096	-0.384849	3.23453	11.4629	16.3383	1.61665	18.9451	28.0702	3.16129	70.4432	101.44
3.14376	39.4747	60.2149	7.90077	75.1554	111.329	3.28406	-1.5096	-0.384849	3.23822	11.353	16.0084	1.61665	18.69	28.0702	3.16855	70.44	101.431
3.14721	39.218	60.2109	7.90423	75.2789	111.699	3.29163	-1.51029	-0.386918	3.23822	11.4624	16.3367	1.613	18.4355	28.0722	3.17215	70.4384	101.426
3.15412	39.0913	60.5971	7.92151	75.2686	111.668	3.29163	-1.51029	-0.386918	3.24197	11.4618	16.335	1.61665	18.4348	28.0702	3.17215	70.4384	101.426
3.15412	39.0913	60.5971	7.92496	75.2666	111.662	3.29163	-1.61824	-0.71076	3.25316	11.7153	16.33	1.61665	18.69	28.0702	3.17948	70.4352	101.416
3.15758	39.3454	60.5932	7.92496	75.2667	111.663	3.29163	-1.2944	0.260765	3.25316	11.7153	16.33	1.62031	19.3493	27.7521	3.17948	70.4352	101.416
3.16103	39.3441	60.5891	7.93533	75.516	111.644	3.29163	-1.61824	-0.71076	3.26059	11.5684	16.6548	1.62031	19.3493	27.7521	3.18673	69.6667	101.407
3.16794	39.3414	60.581	7.94224	76.0227	111.632	3.30678	-1.6196	-0.714847	3.26434	11.5679	16.6531	1.6239	19.454	28.0662	3.18673	69.6667	101.407
3.16794	39.2099	60.1867	7.95261	76.0165	111.613	3.31818	-1.40479	-0.070416	3.26803	11.5673	16.6515	1.6239	19.454	28.0662	3.18673	70.432	101.407
3.17139	39.2086	60.1826	7.95952	76.1423	111.225	3.322	-1.66025	-0.0714726	3.26803	11.5673	16.6515	1.6239	18.9437	28.0662	3.18673	70.432	101.407
3.17485	39.0758	59.7844	7.97335	76.1341	111.2	3.322	-1.66025	-0.0714726	3.27178	11.8219	16.6498	1.6239	18.6886	28.0662	3.19399	70.4288	101.397
3.17485	38.9445	59.3904	7.98372	75.4873	111.558	3.322	-1.66025	-0.0714726	3.27546	11.8213	16.6481	1.63115	18.9424	28.0621	3.19766	70.4272	101.392
3.18521	39.0718	59.7723	7.98717	75.1045	111.176	3.32583	-1.51341	-0.396257	3.27546	11.8213	16.6481	1.63115	18.9424	28.0621	3.20491	70.424	101.383
3.19219	38.8137	59.7642	7.98717	75.4853	111.552	3.32583	-1.51341	-0.396257	3.28665	11.5645	16.6431	1.63481	18.8364	27.7441	3.21584	70.4192	101.368
3.19219	39.0765	60.5527	8.00445	75.4751	111.522	3.32958	-1.51375	-0.397281	3.2904	11.5639	16.6414	1.63481	18.8364	27.7441	3.21584	70.4192	101.368
3.19219	39.0765	60.5527	8.01482	75.469	111.503	3.3334	-1.5141	-0.398325	3.2904	11.4546	16.3133	1.63481	18.8364	27.7441	3.21584	70.4192	101.368
3.19219	39.2078	60.9465	8.01828	75.7224	111.497	3.3448	-1.51513	-0.401437	3.29415	11.3447	15.9836	1.63481	18.8364	27.7441	3.21584	70.4192	101.368
3.19219	39.3392	61.3407	8.03556	75.9675	111.467	3.35238	-1.51582	-0.403506	3.29784	11.1254	15.3259	1.63481	18.8364	27.7441	3.2195	70.1625	101.363
3.1991	39.4605	60.9385	8.03902	75.9655	111.461	3.3562	-1.62405	-0.728175	3.30159	11.1249	15.3242	1.63481	18.9417	28.0601	3.23035	70.2623	101.663
3.20255	39.5906	61.3286	8.04593	75.706	111.448	3.3562	-1.62405	-0.728175	3.30527	11.343	15.9786	1.63847	18.6251	27.1102	3.23768	70.259	101.653
3.20255	39.5905	61.3285	8.06667	76.0744	111.787	3.3562	-1.62405	-0.728175	3.31278	11.3419	15.9753	1.63847	18.6251	27.1102	3.23768	70.7233	102.28
3.20601	39.5892	61.3244	8.06667	76.3297	111.787	3.35238	-1.6237	-0.727144	3.31278	11.597	15.9753	1.64572	18.6238	27.1062	3.23768	70.7233	102.28
3.21637	39.3225	60.5244	8.07704	75.8129	111.769	3.36378	-1.62473	-0.730218	3.31278	11.3419	15.9753	1.63847	18.6859	28.0581	3.24128	70.5126	101.648
3.21637	39.4537	60.9181	8.07704	76.3236	111.769	3.36753	-1.62506	-0.73123	3.31646	11.3414	15.9737	1.63847	18.941	28.0581	3.24128	70.5126	101.648
3.21982	39.3211	60.5203	8.10123	76.3093	111.726	3.37135	-1.51755	-0.408686	3.32396	11.3403	15.9703	1.65297	18.6832	28.05	3.24494	70.766	101.643
3.22673	39.3185	60.5123	8.10468	76.3072	111.72	3.37135	-1.73327	-1.05584	3.32396	11.3403	15.9703	1.65297	18.9384	28.05	3.2522	70.7628	101.634
3.23019	39.0617	60.5082	8.1116	75.542	110.956	3.37135	-1.51755	-0.408686	3.32396	11.3403	15.9703	1.65662	18.6381	28.6798	3.2522	70.5538	101.007
3.23019	39.0617	60.5082	8.12196	75.536	110.938	3.37517	-1.5179	-0.409729	3.32396	11.0852	15.9703	1.65662	19.1483	28.6798	3.25586	70.2971	101.002
3.23364	39.0603	60.5041	8.12888	75.5318	110.926	3.38657	-1.51893	-0.412841	3.32396	11.3403	15.9703	1.65662	19.1483	28.6798	3.25586	70.1925	100.688
3.244	39.0563	60.492	8.13924	75.9013	112.034	3.38657	-1.51893	-0.412841	3.3314	11.0841	15.967	1.66022	19.0423	28.3619	3.25586	70.042	101.002
3.244	39.0563	60.4921	8.14616	75.6469	111.271	3.38657	-2.28426	-0.412841	3.33884	11.083	15.9637	1.66022	18.937	28.046	3.25946	70.0404	100.997
3.24753	38.7923	59.7	8.15307	75.6429	111.259	3.39033	-1.51928	-0.413865	3.33884	11.083	15.9637	1.65662	18.8324	27.7321	3.26678	69.9326	100.674
3.25789	38.7883	59.688	8.16344	75.887	111.991	3.3979	-1.62779	-0.739419	3.34259	11.0824	15.9621	1.65662	18.1723	28.048	3.26678	69.9326	100.674
3.25789	38.7883	59.688	8.1738	75.8808	111.973	3.3979	-1.77507	-0.415933	3.34259	11.0824	15.9621	1.66753	18.1703	28.042	3.27038	70.1401	101.296
3.25789	39.0509	60.4757	8.18072	75.8767	111.96	3.40172	-1.88325	-0.74045	3.34627	11.0819	15.9604	1.66387	18.171	28.044	3.27038	70.1401	101.296
3.26134	39.0496	60.4718	8.18763	75.6172	111.948	3.40555	-1.99141	-1.06494	3.35746	11.1895	16.2833	1.66753	18.065	27.7261	3.27404	70.1385	101.291
3.2648	38.924	60.8614	8.19454	75.6132	111.936	3.4093	-1.88393	-0.742492	3.35746	10.9344	16.2833	1.66753	18.7251	27.4102	3.2813	70.1353	101.282
3.26825	38.9227	60.8573	8.20491	75.7321	112.293	3.41312	-1.77646	-0.420088	3.36121	10.9338	16.2816	1.67112	18.7244	27.4083	3.28496	70.3427	101.904
3.26825	39.1781	60.8574	8.21873	75.8489	112.643	3.4207	-1.77715	-0.422155	3.3649	10.9333	16.28	1.67478	18.7238	27.4063	3.28496	70.3427	101.904
3.27516	39.1754	60.8492	8.22219	75.9772	112.262	3.42827	-2.28806	-0.424223	3.3724	10.8229	15.9488	1.67478	18.7238	27.4063	3.28856	70.3411	101.899
3.27862	39.174	60.8451	8.22565	75.7251	111.505	3.42827	-2.07247	0.222546	3.37608	11.5877	15.9472	1.67478	18.7238	27.4063	3.29588	70.2334	101.576
3.27862	39.4294	60.845	8.23947	75.8418	111.856	3.43592	-1.56296	0.220408	3.37608	11.4784	15.6194	1.67844	18.1683	28.0359	3.30681	70.333	101.875
3.28207	39.6834	60.841	8.24293	76.0953	111.85	3.43592	-1.52342	-0.426309	3.37983	11.4778	15.6178	1.67844	18.1683	28.0359	3.30681	70.2286	101.562
3.28207	39.6835	60.8411	8.24639	76.2235	111.468	3.43592	-1.63121	-0.749668	3.37983	11.2227	15.6178	1.68569	18.6772	28.0319	3.3104	70.227	101.557
3.28552	39.9374	60.837	8.2533	76.3444	111.831	3.44349	-1.52411	-0.428377	3.38727	10.7114	15.6145	1.69294	18.6759	28.0279	3.31406	70.2254	101.552
3.28552	39.9374	60.837	8.27404	76.5875	111.794	3.44732	-1.52446	-0.42942	3.39471	10.7103	15.6112	1.69294	18.8864	28.6595	3.31406	70.2254	101.552
3.28552	39.9374	60.837	8.28095	76.5834	111.782	3.45107	-1.5248	-0.430444	3.39846	10.7098	15.6096	1.69294	18.6759	28.0279	3.31766	70.2238	101.547
3.3028	39.5442	60.4233	8.28786	76.0687	111.77	3.45107	-1.5248	-0.430444	3.40589	10.7087	15.6063	1.69294	18.8864	28.6595	3.32132	70.3266	101.856
3.30632	39.032	60.4192	8.29823	76.0625	111.751	3.46247	-1.41808	-0.110284	3.40965	10.453	15.6046	1.69294	18.6759	28.0279	3.32858	70.219	101.533
3.31323	39.0294	60.4112	8.3086	76.0564	111.733	3.46629	-1.31068	0.211917	3.4134	10.7076	15.603	1.69294	18.931	28.0279	3.33225	70.2173	101.528
3.31323	39.2847	60.4111	8.32242	76.0481	111.708	3.46629	-1.31068	0.211917	3.40965	10.453	15.6046	1.69659	18.9303	28.0259	3.33591	70.7259	101.523
3.31323	39.5401	60.4111	8.33279	75.7866	111.69	3.46629	-1.27108	-0.434597	3.41708	10.4519	15.6013	1.69659	18.6752	28.0259	3.33225	70.7275	101.528
3.31323	39.4159	60.8046	8.3397	76.0379	111.678	3.47004	-1.27142	-0.435621	3.4134	9.94227	15.603	1.70019	18.9296	28.0239	3.33591	70.2157	101.523
3.31668	39.4145	60.8004	8.3397	75.9075	112.053	3.47769	-1.37985	-0.760926	3.42083	10.4514	15.5997	1.70384	18.929	28.0218	3.3395	70.2141	101.518
3.32014	39.4132	60.7964	8.35007	76.2815	112.409	3.48527	-1.34089	-1.40935	3.42827	10.0493	15.924	1.70384	18.929	28.0218	3.34317	69.7023	101.513
3.32359	39.9225	60.7923	8.35698	76.7882	112.396	3.48527	-1.12543	-0.762967	3.43202	10.5589	15.9223	1.70384	18.929	28.0218	3.34317	69.7023	101.513
3.3305	39.1537	60.7842	8.35698	76.7881	112.396	3.48527	-1.63564	-0.762967	3.42827	9.83089	15.2688	1.70384	18.7184	27.3903	3.35043	70.2093	101.504
3.3305	40.3064	61.1778	8.37426	76.2671	112.365	3.48527	-1.78302	-0.439774	3.43202	10.3406	15.2672	1.71475	18.9269	28.0158	3.35409	70.2077	101.499
3.3305	40.3064	61.1779	8.38118	76.263	112.353	3.48527	-1.78302	-0.439774	3.44321	9.82871	15.2623	1.71475	18.9269	28.0158	3.35769	70.2061	101.494
3.34086	39.2809	61.1657	8.39154	76.2569	112.335	3.50042	-1.7844	-0.443907	3.44689	10.2292	14.9331	1.71834	19.0315	28.3295	3.36135	70.2045	101.489
3.34432	39.2795	61.1617	8.40191	76.2506	112.316	3.50042	-1.52929	-0.443907	3.44321	9.71953	14.9347	1.71834	19.0315	28.3295	3.36861	70.0969	101.167
3.35123	39.2768	61.1535	8.40882	76.4962	113.053	3.50042	-1.52929	-0.443907	3.44689	9.82817	15.2607	1.722	19.0308	28.3275	3.36861	70.2013	101.48
3.35468	39.2754	61.1493	8.41919	76.4901	113.034	3.50042	-1.52929	-0.443907	3.44689	9.57306	15.2607	1.722	18.9256	28.0118	3.37227	70.0953	101.162
3.35468	39.524	60.3627	8.41919	76.6148	113.408	3.50806	-1.78509	-0.445993	3.45064	9.57252	15.259	1.722	18.9256	28.0118	3.37953	70.1965	101.465
3.35468	39.524	60.3626	8.4261	76.6107	113.396	3.50806	-1.78509	-0.445993	3.45808	9.57143	15.2558	1.72925	18.9243	28.0078	3.37953	70.1965	101.465
3.36159	39.5213	60.3546	8.44338	76.8557	113.365	3.51564	-1.78578	-0.44806	3.46552	9.82546	15.2525	1.72566	18.9249	28.0097	3.38679	69.7875	101.769
3.36511	39.52	60.3506	8.44338	76.8556	113.365	3.51564	-2.296	-0.44806	3.46552	10.2265	14.9251	1.72925	18.7744	28.3234	3.39045	70.7019	101.451
3.36856	39.3942	60.7396	8.47103	76.7144	112.941	3.52321	-2.29669	-0.450126	3.47302	10.2254	14.9218	1.72925	18.7744	28.3234	3.39045	69.6815	101.451
3.37547	39.5227	61.125	8.47103	76.7144	112.941	3.53079	-1.53205	-0.452192	3.47302	10.2254	14.9218	1.72925	18.7744	28.3234	3.39045	69.7859	101.764
3.37547	39.2673	61.125	8.47795	76.7103	112.929	3.53079	-1.78716	-0.452192	3.47302	10.2254	14.9218	1.72925	18.7744	28.3234	3.39411	69.5291	101.759
3.37547	39.2673	61.125	8.49523	76.6999	112.898	3.53079	-1.78716	-0.452192	3.47302	9.97033	14.9218	1.73291	18.7737	28.3214	3.40137	69.6767	101.436
3.38584	39.5186	61.1128	8.49523	76.3198	112.523	3.53843	-1.78786	-0.454278	3.4767	9.96979	14.9202	1.73657	19.178	28.0037	3.40497	69.5243	101.745
3.38584	39.774	61.1128	8.50214	76.1911	112.137	3.55359	-1.27901	-0.45841	3.48046	9.96925	14.9186	1.73657	19.178	28.0037	3.41229	69.7762	101.735
3.38584	39.774	61.1127	8.51943	76.1808	112.106	3.55359	-1.78923	-0.45841	3.48414	10.2238	14.917	1.73657	19.0728	27.6881	3.41589	70.1805	101.417
3.38929	40.2834	61.1087	8.52979	76.6732	113.584	3.55741	-1.27936	-0.459452	3.49164	10.2227	14.9137	1.73657	18.6678	28.0037	3.41955	70.9441	101.412
3.39275	40.282	61.1046	8.52979	76.424	112.836	3.56116	-2.15268	-0.783415	3.49164	10.1136	14.5864	1.73657	18.5626	27.6881	3.42322	70.6874	101.408
3.39275	40.1509	60.7112	8.53671	77.1798	113.571	3.56116	-1.89757	-0.783415	3.49164	10.1136	14.5864	1.74016	18.6671	28.0017	3.43047	70.6842	101.398
3.3962	39.5078	60.3141	8.54362	77.1756	113.559	3.56498	-1.89791	-0.784445	3.49164	10.1136	14.5864	1.74016	18.6671	28.0017	3.43047	70.6842	101.398
3.3962	39.6388	60.7072	8.54362	77.1756	113.559	3.56881	-2.00589	-1.10839	3.50283	10.2211	14.9089	1.74381	18.9216	27.9997	3.43047	70.174	101.398
3.40311	39.6361	60.699	8.56435	77.1631	113.521	3.57256	-2.00623	-1.10939	3.51027	10.2201	14.9057	1.74381	18.9216	27.9997	3.43047	70.174	101.398
3.40656	39.7659	61.0883	8.57127	76.9037	113.509	3.57638	-1.75145	-1.1104	3.51395	9.45419	14.9041	1.75106	18.41	27.9957	3.43407	70.1724	101.393
3.41002	39.7645	61.0842	8.57127	77.0283	113.883	3.58014	-1.75179	-1.1114	3.51395	9.45419	14.9041	1.75106	18.5152	28.3113	3.43407	70.1724	101.393
3.41347	39.5078	61.0802	8.58855	77.0178	113.852	3.58396	-1.75213	-1.11242	3.5177	9.45365	14.9024	1.75106	18.5152	28.3113	3.4414	70.1692	101.384
3.41693	39.5064	61.0762	8.59891	77.0117	113.833	3.59153	-1.86041	-1.43727	3.52514	10.2179	14.8992	1.75106	18.8308	29.2581	3.44865	70.166	101.374
3.4239	39.5037	61.068	8.60237	76.885	113.453	3.59153	-1.53757	-0.468758	3.52514	9.34348	14.5719	1.75106	18.8308	29.2581	3.45232	70.4774	102.308
3.42736	39.6334	61.4571	8.61274	76.8787	113.434	3.59536	-1.3227	0.175849	3.53264	9.34241	14.5687	1.75106	19.0859	29.2581	3.45232	70.4774	102.308
3.43081	39.6321	61.4531	8.62311	76.6172	113.416	3.59536	-1.3227	0.175849	3.53633	9.34188	14.5671	1.75831	18.7242	28.9384	3.45232	70.2687	101.682
3.43081	39.6321	61.4531	8.63002	76.6131	113.403	3.60293	-1.83363	0.173733	3.53633	9.34188	14.5671	1.75831	18.4691	28.9384	3.46317	70.519	101.668
3.43081	39.6321	61.4531	8.63693	76.6089	113.391	3.60676	-1.83398	0.172665	3.53633	9.34188	14.5671	1.75831	18.2588	28.3072	3.46317	70.519	101.668
3.43772	39.7536	61.0516	8.64384	76.86	113.378	3.61051	-1.83433	0.171617	3.54751	9.34027	14.5623	1.76197	18.5132	28.3052	3.46317	70.2639	101.668
3.44117	40.0076	61.0476	8.65767	76.8518	113.353	3.61051	-1.83433	0.171617	3.54751	9.59538	14.5623	1.76922	18.5118	28.3011	3.47409	70.2591	101.653
3.44117	39.4969	61.0477	8.66458	77.0964	114.087	3.61433	-1.32447	0.170549	3.54751	9.59538	14.5623	1.77288	18.7663	28.2991	3.47409	70.3634	101.966
3.44463	39.4956	61.0436	8.66458	77.0965	114.088	3.61433	-1.32447	0.170549	3.55127	9.84996	14.5607	1.77647	19.1706	27.9816	3.47409	70.3634	101.966
3.45845	39.6212	61.4204	8.6784	76.9638	113.69	3.61815	-1.32483	0.169481	3.55127	9.84996	14.5607	1.77288	19.1713	27.9836	3.47409	70.3634	101.966
3.45845	39.6212	61.4204	8.69914	76.9513	113.652	3.62573	-1.32553	0.167365	3.55495	9.84943	14.5591	1.77288	19.1266	28.6146	3.48142	70.3601	101.956
3.45845	39.6212	61.4205	8.70605	77.2026	113.64	3.62573	-1.83575	0.167365	3.55495	10.1045	14.5591	1.77288	18.9162	27.9836	3.48142	70.2559	101.643
3.45845	39.8766	61.4204	8.70951	76.9516	112.887	3.63331	-2.05159	-0.480146	3.57357	9.51965	13.5698	1.77288	19.1266	28.6146	3.48142	70.2559	101.643
3.45845	40.1319	61.4205	8.71297	76.8253	112.508	3.63713	-2.05194	-0.481188	3.57732	9.84622	14.5495	1.77288	18.3612	28.6146	3.49594	70.2494	101.624
3.46536	40.1292	61.4123	8.73025	76.8148	112.476	3.6447	-1.83752	0.162066	3.57732	9.73719	14.2224	1.77288	18.3612	28.6146	3.49594	70.2494	101.624
3.46536	39.8739	61.4123	8.74062	77.0573	113.204	3.64853	-2.16052	-0.806942	3.58108	9.73665	14.2208	1.77288	18.256	28.2991	3.5032	70.2462	101.615
3.47226	39.7401	61.0111	8.74062	76.802	113.204	3.65228	-1.58311	0.15995	3.58476	9.73613	14.2192	1.77647	18.2554	28.2971	3.50686	70.2446	101.61
3.48269	39.3496	60.6057	8.74753	76.9222	113.565	3.64853	-1.83787	0.160998	3.58851	9.33439	14.5447	1.77647	18.5105	28.2971	3.50686	69.781	100.984
3.48615	39.3483	60.6017	8.75444	76.4073	113.552	3.65228	-1.58311	0.15995	3.59226	9.73506	14.216	1.78738	18.5085	28.291	3.51052	70.0345	100.979
3.48615	39.3483	60.6017	8.76136	76.4032	113.54	3.6561	-1.83858	0.158882	3.59226	9.22484	14.216	1.78738	18.5085	28.291	3.51052	70.243	101.605
3.48615	39.3483	60.6017	8.77518	76.3949	113.515	3.65992	-1.58383	0.157815	3.59226	9.47995	14.216	1.79103	19.018	28.289	3.51412	70.2414	101.6
3.48615	39.3483	60.6017	8.77518	76.9056	113.515	3.65992	-1.7989	-0.487402	3.60714	9.22273	14.2097	1.79103	19.018	28.289	3.51412	70.2414	101.6
3.4896	39.9952	61.7763	8.789	76.8973	113.49	3.6675	-1.79959	-0.489467	3.60714	9.47784	14.2097	1.79103	19.0628	27.658	3.51778	70.2398	101.595
3.4896	39.7398	61.7763	8.79592	76.7687	113.104	3.6675	-1.54448	-0.489467	3.61457	9.36779	13.8795	1.79103	18.8077	27.658	3.52138	70.2382	101.59
3.49651	39.9925	61.7681	8.8132	76.7584	113.073	3.6675	-1.54448	-0.489467	3.61457	9.47678	14.2065	1.79469	19.2724	28.2869	3.52504	70.2366	101.586
3.51033	39.987	61.7518	8.8132	77.2692	113.073	3.67508	-1.80027	-0.491532	3.61832	9.47625	14.2049	1.79469	19.3776	28.6024	3.52504	70.0281	100.96
3.51033	39.8561	61.3591	8.82356	77.0076	113.055	3.6789	-1.65303	-0.815119	3.61832	9.36726	13.8779	1.80553	19.2704	28.2809	3.5323	70.0249	100.951
3.51033	39.8562	61.3593	8.83393	77.2497	113.781	3.6789	-1.65303	-0.815119	3.61832	9.36726	13.8779	1.80553	19.2704	28.2809	3.5323	70.0249	100.951
3.51033	39.8561	61.3591	8.84084	77.2457	113.769	3.68265	-1.90847	-0.816129	3.62576	9.87643	13.8748	1.80553	19.5256	28.2809	3.54688	70.0185	100.931
3.51378	39.8548	61.3551	8.84084	77.2457	113.769	3.69405	-1.9095	-0.819197	3.62951	9.36568	13.8732	1.80553	19.0601	27.65	3.55048	70.0169	100.927
3.51378	39.8548	61.3551	8.86849	77.6016	114.837	3.69405	-1.9095	-0.819197	3.63695	8.85441	13.8701	1.80919	19.0595	27.648	3.55781	70.2221	101.542
3.53106	39.9788	61.7272	8.86849	77.2289	113.719	3.69787	-1.90984	-0.820226	3.6407	9.98328	14.1953	1.81285	19.3742	28.5922	3.55781	70.3263	101.855
3.53106	39.9788	61.7272	8.8754	77.1007	113.334	3.69787	-1.90984	-0.820226	3.64438	9.98276	14.1938	1.81285	18.864	28.5922	3.5614	70.3247	101.85
3.53106	39.848	61.3348	8.88232	77.0965	113.321	3.70545	-1.91052	-0.822265	3.64813	9.98223	14.1922	1.81285	18.864	28.5922	3.5614	70.3247	101.85
3.53458	39.9774	61.723	8.89268	77.0903	113.303	3.70927	-1.91086	-0.823294	3.65189	9.98169	14.1906	1.81285	19.1191	28.5922	3.56506	70.2189	101.533
3.53458	40.2393	62.5086	8.90305	77.084	113.284	3.70927	-1.91086	-0.823294	3.65189	9.98169	14.1906	1.81285	18.3538	28.5922	3.57232	70.2157	101.523
3.53458	39.8466	61.3305	8.90996	77.0799	113.271	3.71685	-2.01901	-1.14775	3.65932	9.47041	14.1874	1.8201	18.8626	28.5882	3.57232	70.2157	101.523
3.53803	40.107	62.1118	8.92033	77.3218	113.997	3.72442	-1.76457	-1.14976	3.65932	8.85126	13.8606	1.8201	19.1177	28.5882	3.57599	70.2141	101.518
3.5553	40.2311	62.4839	8.92725	77.3177	113.985	3.72825	-1.54999	-0.50602	3.66301	8.85074	13.859	1.8201	19.1177	28.5882	3.57958	70.4208	102.138
3.5553	40.1002	62.0912	8.93762	77.3114	113.966	3.72825	-1.54999	-0.50602	3.66301	8.7418	13.5322	1.8201	18.8626	28.5882	3.58324	70.1641	102.134
3.5553	39.9693	61.6985	8.94453	76.9207	114.326	3.73582	-1.55068	-0.508085	3.67051	8.84968	13.8559	1.8201	18.8023	27.642	3.58324	70.2108	101.508
3.56221	39.9665	61.6903	8.95144	77.1718	114.313	3.73964	-1.55103	-0.509126	3.67051	8.74075	13.5291	1.8201	19.1177	28.5882	3.58691	70.2092	101.504
3.55875	39.9679	61.6944	8.96181	77.1655	114.295	3.74722	-1.55172	-0.51119	3.67795	8.73971	13.526	1.8201	18.8023	27.642	3.58691	70.1051	101.191
3.56221	39.7048	60.9052	8.97909	77.1551	114.263	3.75104	-1.80717	-0.512231	3.68538	8.99378	13.5228	1.8201	18.5472	27.642	3.5905	69.8484	101.186
3.56567	39.7035	60.9012	8.98255	77.4083	114.257	3.75104	-1.91461	-0.834535	3.68538	9.10269	13.8496	1.8201	18.8626	28.5882	3.59417	69.8468	101.181
3.57259	39.7008	60.893	8.98946	77.5282	114.617	3.75104	-1.80717	-0.512231	3.6817	8.48408	13.5244	1.83825	18.8592	28.578	3.60143	69.8436	101.172
3.57259	39.9624	61.6779	8.98946	77.6596	114.245	3.75862	-1.80786	-0.514295	3.68538	8.59247	13.8496	1.83825	18.8592	28.578	3.60875	69.8403	101.162
3.58296	40.3383	61.2734	9.00329	77.8992	114.963	3.75862	-1.80786	-0.514295	3.69282	9.31944	14.4998	1.83825	18.8592	28.578	3.60875	69.8403	101.162
3.58642	39.957	61.6616	9.01365	77.1267	114.944	3.76237	-1.8082	-0.515317	3.69657	8.33579	13.8448	1.83825	19.1143	28.578	3.60875	69.8403	101.162
3.58642	39.8262	61.2694	9.02057	77.1226	114.932	3.76237	-1.8082	-0.515317	3.70032	9.31836	14.4966	1.83825	19.1143	28.578	3.61235	70.0938	101.157
3.5968	39.8221	61.2571	9.03093	76.9924	114.541	3.76619	-1.80855	-0.516359	3.704	9.31784	14.495	1.8455	19.113	28.5739	3.61601	70.0922	101.153
3.5968	39.8221	61.257	9.03439	77.1142	114.907	3.76619	-2.57387	-0.516359	3.70776	9.20842	14.1667	1.8455	19.113	28.5739	3.62327	70.1932	101.455
3.60025	39.5654	61.253	9.03785	77.6228	114.9	3.77377	-2.31946	-0.518422	3.71151	8.99012	13.5119	1.83825	19.1143	28.578	3.62693	70.1915	101.451
3.60025	39.5654	61.253	9.05513	77.7438	114.497	3.78142	-2.32015	-0.520505	3.71519	9.20736	14.1636	1.8455	19.263	28.2586	3.63785	70.1867	101.436
3.60025	39.6961	61.6453	9.05513	78.1231	114.869	3.78142	-2.06504	-0.520505	3.71894	8.98908	13.5087	1.84916	18.8572	28.5719	3.63785	70.1867	101.436
3.60371	39.6948	61.6412	9.06204	78.1189	114.856	3.78517	-2.42789	-0.843716	3.72263	8.98857	13.5072	1.84916	18.647	27.9413	3.63785	69.9316	101.436
3.61063	39.9474	61.6329	9.07932	77.8529	114.824	3.78899	-2.38791	-1.4891	3.72263	8.98857	13.5072	1.85279	18.9014	27.9393	3.63785	69.9316	101.436
3.61409	39.946	61.6288	9.08969	77.8467	114.806	3.79274	-2.38823	-1.49008	3.73013	8.98752	13.504	1.85279	19.1116	28.5698	3.63785	70.0357	101.748
3.61409	40.0768	62.0212	9.09314	77.8446	114.799	3.80039	-2.3889	-1.49209	3.73013	8.98752	13.504	1.85279	19.1116	28.5698	3.64871	70.0309	101.734
3.61409	40.0769	62.0214	9.10351	77.9621	115.152	3.80414	-1.66426	-0.848821	3.73757	8.65993	12.5213	1.86006	19.1103	28.5658	3.64871	70.0309	101.734
3.61409	40.0769	62.0213	9.11388	77.832	114.762	3.80796	-1.34249	0.11649	3.73757	8.65993	12.5213	1.86369	19.1096	28.5637	3.65237	70.0293	101.729
3.61409	40.0769	62.0213	9.11388	78.3427	114.762	3.81179	-1.34285	0.115423	3.73757	8.65993	12.5213	1.86369	19.2147	28.879	3.65237	70.0293	101.729
3.61409	40.0769	62.0213	9.1277	78.3343	114.736	3.81554	-1.34319	0.114376	3.745	8.65892	12.5182	1.86369	19.0646	29.1942	3.65237	70.1803	101.417
3.62792	40.3267	62.0049	9.13807	78.328	114.717	3.82312	-1.59901	0.112262	3.745	8.65892	12.5182	1.86369	19.0646	29.1942	3.66696	70.1739	101.397
3.6383	40.3226	61.9925	9.14153	78.3259	114.711	3.82312	-1.81372	-0.531862	3.75994	8.61941	13.1651	1.86732	19.0639	29.1922	3.65963	70.1771	101.407
3.6383	40.3226	61.9925	9.14498	77.8131	114.705	3.83076	-1.81441	-0.533944	3.75994	8.61941	13.1651	1.87096	19.0633	29.1901	3.66696	70.1739	101.397
3.6383	40.3226	61.9926	9.16227	77.5471	114.673	3.83076	-1.92176	-0.855981	3.75994	8.72824	13.4915	1.87459	19.2126	28.8728	3.67055	70.1723	101.393
3.64521	40.0646	61.9844	9.16918	77.5429	114.661	3.83076	-1.92176	-0.855981	3.75994	8.72824	13.4915	1.87459	19.2126	28.8728	3.67421	70.1706	101.388
3.64521	40.326	62.7688	9.17955	77.7921	114.642	3.83076	-2.0291	-1.17802	3.76363	8.72772	13.49	1.87096	19.2133	28.8749	3.68147	70.2715	101.69
3.64867	40.3246	62.7645	9.18992	77.7857	114.623	3.84591	-2.03044	-1.18204	3.77113	8.72667	13.4868	1.87096	19.1082	28.5597	3.68147	70.1674	101.378
3.65213	40.1926	62.3685	9.19683	78.037	114.61	3.84974	-2.03078	-1.18306	3.77857	8.72563	13.4837	1.87822	19.2119	28.8708	3.68514	70.0617	101.061
3.65559	40.1912	62.3643	9.20374	78.4119	114.969	3.84974	-2.03078	-1.18306	3.77857	8.72563	13.4837	1.87096	19.2133	28.8749	3.68514	69.9577	100.749
3.65559	40.1912	62.3643	9.22103	78.146	114.937	3.85731	-2.03145	-1.18507	3.77857	8.21542	13.4837	1.87822	19.2119	28.8708	3.68873	70.0602	101.056
3.66597	40.1871	62.3519	9.22448	78.1438	114.931	3.86113	-2.03179	-1.18608	3.78975	8.61528	13.1526	1.88912	19.1048	28.5495	3.69239	70.0585	101.052
3.67288	40.1844	62.3438	9.22794	78.1418	114.925	3.86113	-1.81717	-0.542214	3.79344	8.35966	13.1511	1.89275	18.9541	28.8626	3.69606	69.8488	100.422
3.67288	40.1843	62.3437	9.23831	78.3909	114.906	3.86113	-1.81717	-0.542214	3.78975	7.99628	12.8263	1.89275	18.9541	28.8626	3.70691	69.8441	100.408
3.67634	40.4443	63.1237	9.24176	78.5043	116.013	3.86489	-1.5624	-0.543236	3.79344	8.25087	12.8248	1.89638	18.9534	28.8605	3.71058	69.7954	101.028
3.6798	40.1816	62.3354	9.26595	78.374	114.855	3.87253	-2.32842	-0.545317	3.79719	8.50546	12.8232	1.89638	18.9534	28.8605	3.71058	69.8995	101.34
3.68671	40.3034	61.9351	9.26595	78.6293	114.855	3.88011	-2.22182	-0.225508	3.81206	8.61218	13.1434	1.89638	18.9534	28.8605	3.71424	69.8979	101.335
3.68671	40.8142	61.9349	9.27287	78.3698	114.843	3.88386	-1.60466	0.095316	3.81206	8.82971	13.796	1.89638	18.9534	28.8605	3.71783	69.8963	101.33
3.69017	40.8128	61.9309	9.28323	78.6187	114.824	3.88386	-1.60466	0.095316	3.81581	8.82918	13.7944	1.89638	19.2085	28.8605	3.72516	69.893	101.32
3.69364	40.2947	61.1428	9.29015	78.6146	114.811	3.89151	-2.11559	0.0931836	3.81581	8.82918	13.7944	1.90002	19.1028	28.5434	3.72516	69.6379	101.32
3.69709	40.2934	61.1387	9.30051	78.3529	114.792	3.89151	-1.60537	0.0931836	3.81581	9.08429	13.7944	1.90002	18.8477	28.5434	3.72876	69.8914	101.316
3.69709	40.2934	61.1387	9.30743	77.9698	114.409	3.89151	-1.60537	0.0931836	3.82325	8.97449	13.465	1.89275	18.849	28.5474	3.73242	69.8898	101.311
3.70401	39.7799	61.1305	9.31434	77.9655	114.396	3.91048	-1.82165	-0.555647	3.827	8.86522	13.1371	1.89638	18.8484	28.5454	3.73968	69.7826	100.989
3.70747	39.7786	61.1265	9.32125	78.0765	115.495	3.91048	-1.82165	-0.555647	3.83075	8.8647	13.1356	1.89638	18.8484	28.5454	3.74334	70.1401	101.296
3.70747	39.9092	61.5182	9.33162	78.3257	115.477	3.91423	-1.82199	-0.556669	3.83075	8.8647	13.1356	1.89638	18.8484	28.5454	3.74334	70.0361	100.984
3.71093	40.0385	61.9062	9.34199	78.064	115.458	3.91423	-1.82199	-0.556669	3.83075	8.60959	13.1356	1.90365	18.952	28.8564	3.7506	70.0329	100.975
3.71438	40.1678	62.2942	9.3489	78.0597	115.445	3.91048	-1.82165	-0.555647	3.83075	8.60959	13.1356	1.90365	19.1021	28.5413	3.7506	70.0329	100.975
3.71438	40.1678	62.2942	9.35581	78.0555	115.432	3.91048	-2.07676	-0.555647	3.83444	8.50034	12.8078	1.91455	19.1001	28.5352	3.7506	70.1369	101.287
3.72822	40.1623	62.2777	9.36618	78.3045	115.413	3.91423	-2.14374	-1.52194	3.83819	8.49982	12.8063	1.91818	19.0994	28.5332	3.7506	70.1369	101.287
3.72822	39.9069	62.2777	9.38346	78.2939	115.381	3.91423	-1.82199	-0.556669	3.84562	8.4988	12.8032	1.91818	19.0994	28.5332	3.76512	70.1305	101.267
3.73167	39.9056	62.2736	9.38346	78.2939	115.381	3.92563	-1.88963	-1.52493	3.85306	8.49777	12.8001	1.91818	18.8443	28.5332	3.76878	69.8169	100.327
3.73514	39.6488	62.2695	9.39037	78.2897	115.369	3.93328	-1.05839	-0.561852	3.85306	8.49777	12.8001	1.91818	18.8443	28.5332	3.76878	70.0249	100.951
3.73859	39.6474	62.2653	9.39037	78.4133	115.739	3.93703	-1.38041	-1.52792	3.85306	8.49777	12.8001	1.91818	18.5892	28.5332	3.76878	70.176	100.639
3.73859	39.6474	62.2654	9.41457	78.6538	115.695	3.94085	-1.1663	-0.885581	3.86056	8.49674	12.797	1.91818	19.0093	29.7934	3.76878	69.8169	100.327
3.74205	39.7766	62.6529	9.42494	77.8813	115.676	3.94843	-1.89162	-1.5309	3.868	7.98551	12.794	1.91818	18.9493	28.8483	3.77244	69.9193	100.634
3.74205	39.7766	62.6529	9.43185	77.8769	115.663	3.94843	-1.9323	-0.887618	3.868	8.20291	13.4462	1.91818	18.9493	28.8483	3.77604	70.0217	100.941
3.74205	40.2874	62.6528	9.43876	77.8728	115.65	3.94843	-1.9323	-0.887618	3.868	8.71312	13.4462	1.92181	18.6935	28.8462	3.77604	70.1257	101.253
3.74897	40.1541	62.253	9.43876	78.3921	114.91	3.95601	-1.67787	-0.889654	3.87168	8.49521	12.7925	1.92545	18.9479	28.8442	3.78336	69.8673	101.243
3.75588	40.1513	62.2447	9.45604	78.373	115.618	3.96365	-1.57136	-0.570117	3.87168	8.49521	12.7925	1.92545	19.7133	28.8442	3.78696	70.1208	101.238
3.75588	39.6406	62.2448	9.4595	78.7496	115.982	3.96365	-1.82647	-0.570117	3.87543	8.49469	12.7909	1.92908	19.7126	28.8421	3.78696	70.1208	101.238
3.75588	40.4067	62.2448	9.4595	78.7411	116.723	3.97123	-1.57205	-0.572178	3.88287	8.49367	12.7878	1.92908	19.6076	28.5271	3.78696	69.8657	101.238
3.7628	40.1486	62.2365	9.46987	78.99	116.703	3.97123	-1.57205	-0.572178	3.89406	8.49213	12.7832	1.93271	19.712	28.8401	3.79422	69.8625	101.229
3.77317	40.1445	62.2241	9.48369	78.9815	116.678	3.97123	-1.57205	-0.572178	3.89406	8.38346	12.4572	1.93635	18.9459	28.838	3.79788	69.8609	101.224
3.77317	40.1444	62.224	9.48369	78.8581	116.308	3.97123	-1.57205	-0.572178	3.89406	8.38346	12.4572	1.93635	18.9459	28.838	3.79788	69.6058	101.224
3.77317	40.1445	62.2241	9.49752	78.7263	115.912	3.9788	-1.57273	-0.57424	3.90525	8.59925	13.1046	1.93635	18.9459	28.838	3.80155	69.8593	101.219
3.77664	40.1431	62.22	9.50097	78.7242	115.906	3.9788	-1.82784	-0.57424	3.91643	8.38041	12.448	1.93998	19.1552	29.466	3.81247	69.8545	101.205
3.78701	40.3943	62.2076	9.51825	78.8368	116.244	3.9788	-2.33806	-0.57424	3.91643	8.48905	12.774	1.94362	18.9445	28.8339	3.81247	69.7505	100.893
3.78701	40.3943	62.2076	9.52516	78.8326	116.231	3.98638	-2.33875	-0.576301	3.92019	8.48854	12.7724	1.94362	18.9445	28.8339	3.82698	69.848	101.185
3.78701	40.3943	62.2077	9.53208	78.8283	116.218	3.9902	-2.3391	-0.577341	3.92019	8.3799	12.4465	1.94362	18.9445	28.8339	3.82698	69.9992	100.874
3.79047	40.3929	62.2035	9.53553	79.0815	116.212	3.99402	-2.33944	-0.578381	3.92019	8.3799	12.4465	1.94362	18.9445	28.8339	3.82698	69.9992	100.874
3.79393	40.9023	62.1993	9.55627	79.0687	116.173	4.0016	-2.34013	-0.580442	3.92019	8.3799	12.4465	1.95088	18.8833	27.8849	3.82698	69.9992	100.874
3.79739	40.901	62.1953	9.56318	79.0644	116.161	4.00535	-2.38127	0.0614407	3.92019	8.01614	12.1206	1.94362	18.8847	27.889	3.82698	69.848	101.185
3.80084	40.8996	62.1912	9.56318	79.0644	116.161	4.00917	-2.38162	0.0603752	3.92387	7.79837	11.4672	1.95088	18.9883	28.1999	3.82698	69.5929	101.185
3.80776	40.6414	62.1829	9.577	79.0559	116.135	4.01675	-2.38233	0.0582636	3.92387	7.76054	12.1191	1.95088	18.9883	28.1999	3.83424	69.5897	101.176
3.81122	40.64	62.1787	9.577	78.8007	116.135	4.01675	-1.87212	0.0582636	3.92762	7.54277	11.4658	1.95452	18.9425	28.8278	3.84517	69.5849	101.161
3.81814	40.3819	62.1706	9.59774	79.0343	116.836	4.01675	-1.87212	0.0582636	3.92762	7.76004	12.1176	1.95452	18.9425	28.8278	3.84883	69.5833	101.156
3.82505	40.3792	62.1623	9.6012	79.0323	116.83	4.02057	-1.61736	0.0571982	3.94249	7.75802	12.1115	1.95815	18.9418	28.8257	3.85242	70.0353	100.217
3.82505	39.6131	62.1623	9.60811	79.0279	116.817	4.0244	-1.61772	0.0561327	3.94624	7.86613	12.4358	1.96541	18.9404	28.8216	3.85242	70.0353	100.217
3.82851	39.6117	62.1581	9.61502	79.0236	116.804	4.02815	-1.61807	0.0550867	3.95	8.01211	12.1085	1.96905	19.1949	28.8196	3.85242	69.5251	100.217
3.83197	39.6103	62.154	9.62539	79.2726	116.785	4.03197	-1.61842	0.0540213	3.96112	8.0106	12.104	1.96905	19.1949	28.8196	3.85242	69.5251	100.217
3.83543	39.8644	62.15	9.62539	79.1494	116.415	4.04712	-1.72693	-0.271513	3.96112	7.7555	12.104	1.95815	19.1969	28.8257	3.85609	69.5235	100.212
3.83889	39.9933	62.5369	9.63576	79.1429	116.396	4.04712	-1.72693	-0.271513	3.96112	7.7555	12.104	1.96905	19.1949	28.8196	3.86335	69.5203	100.202
3.83889	39.9934	62.537	9.6565	79.3855	116.358	4.04712	-1.83404	-0.592825	3.96112	7.7555	12.104	1.96905	19.1949	28.8196	3.86701	69.5753	101.132
3.83889	40.1184	62.1458	9.65995	79.3834	116.351	4.05095	-1.83438	-0.593865	3.96487	7.6464	11.7767	1.97268	19.1942	28.8175	3.87793	69.7782	101.741
3.83889	40.2488	62.5371	9.66687	78.8685	116.339	4.05095	-1.83438	-0.593865	3.96487	7.86359	12.4282	1.97268	19.1942	28.8175	3.87793	70.1371	102.053
3.84927	40.6304	62.9161	9.67032	79.377	116.332	4.0661	-1.83576	-0.597985	3.96862	7.35286	12.4267	1.97631	18.9384	28.8155	3.88153	70.1355	102.048
3.85272	40.4986	62.5206	9.68069	79.3706	116.313	4.0661	-1.83576	-0.597985	3.97606	7.86206	12.4236	1.97631	18.9384	28.8155	3.88153	69.8804	102.048
3.85272	40.4985	62.5204	9.69106	78.9766	116.663	4.06992	-1.83611	-0.599025	3.97606	7.75348	12.0979	1.97631	19.0434	29.1304	3.88885	70.1323	102.038
3.85272	40.8844	62.9119	9.69797	78.9723	116.65	4.06992	-1.83611	-0.599025	3.97981	7.35133	12.4221	1.97631	19.0434	29.1304	3.89245	69.8191	101.099
3.85964	40.8817	62.9037	9.70834	79.4767	116.631	4.0775	-1.83679	-0.601085	3.98724	7.75197	12.0934	1.97994	18.9377	28.8134	3.89245	69.564	101.099
3.85964	40.8872	63.6863	9.7118	79.0961	116.256	4.08132	-1.9442	-0.923322	3.98724	7.53484	11.442	1.97994	18.9377	28.8134	3.89611	69.3073	101.094
3.85964	40.8872	63.6863	9.71871	79.0918	116.243	4.08132	-1.43398	-0.923322	3.99468	7.75096	12.0903	1.98358	18.937	28.8114	3.90337	69.5592	101.084
3.85964	40.8872	63.6863	9.73599	79.0811	116.211	4.08514	-1.43433	-0.924349	3.99843	7.71245	12.7401	1.98721	19.1915	28.8093	3.90337	69.5592	101.084
3.86656	40.8844	63.678	9.73945	79.079	116.204	4.08514	-1.64845	-1.56672	4.00211	7.8205	13.0643	1.99084	19.1908	28.8073	3.90703	69.5576	101.079
3.87693	40.8802	63.6654	9.74981	79.0726	116.185	4.08514	-1.39334	-1.56672	4.00211	7.8205	13.0643	1.99084	19.1908	28.8073	3.91063	69.6034	100.451
3.87693	40.8748	62.8829	9.76364	79.1871	116.529	4.08514	-1.39334	-1.56672	4.00587	7.81998	13.0627	1.99084	19.2505	29.7518	3.91063	69.6034	100.451
3.87693	40.6194	62.8829	9.76709	79.3078	116.891	4.08889	-2.159	-1.5677	4.00962	7.85748	12.4099	1.99084	19.2505	29.7518	3.91429	69.6018	100.447
3.89077	40.3586	62.8664	9.76709	79.3079	116.891	4.09272	-1.90422	-1.5687	4.0133	7.53137	11.4316	1.99811	19.2491	29.7476	3.91429	69.6018	100.447
3.88385	40.872	62.8747	9.77746	79.6799	117.241	4.09647	-1.83851	-0.606245	4.0133	7.53137	11.4316	1.99811	19.0392	29.118	3.91429	69.6018	100.447
3.89077	40.6193	63.6487	9.78437	79.6755	117.228	4.09647	-2.15966	-1.56968	4.02074	7.78548	11.4286	1.99811	19.0392	29.118	3.91429	69.7056	100.758
3.89423	40.6179	63.6445	9.80165	79.6648	117.196	4.09647	-1.83851	-0.606245	4.02824	7.893	11.7512	1.99811	19.0845	28.4884	3.92888	69.5954	100.427
3.89768	40.8665	62.8581	9.80165	79.5418	116.827	4.10787	-1.83954	-0.609344	4.02824	7.27427	11.4256	1.99811	19.3396	28.4884	3.93247	69.6976	100.734
3.89768	40.8665	62.858	9.8293	79.014	116.775	4.11169	-1.83989	-0.610383	4.03568	7.63691	11.7482	2.00174	19.5488	29.116	3.93613	69.7523	101.663
3.90114	40.8651	62.8539	9.8293	79.014	116.775	4.11551	-1.84024	-0.611422	4.03568	7.89201	11.7482	2.00537	19.5481	29.1139	3.94339	69.7491	101.654
3.9046	40.8637	62.8498	9.83967	79.0076	116.756	4.12309	-1.84092	-0.613482	4.04311	7.89101	11.7452	2.01627	19.546	29.1077	3.94339	69.7491	101.654
3.91152	40.8609	62.8414	9.84658	79.0033	116.743	4.12684	-1.84126	-0.614502	4.05055	7.89001	11.7422	2.01627	19.6509	29.4225	3.94706	69.7475	101.649
3.91152	40.8609	62.8414	9.84658	79.514	116.743	4.12684	-1.84126	-0.614502	4.0543	8.14462	11.7407	2.01264	19.3965	29.4245	3.94706	69.6437	101.338
3.92189	40.8568	62.8289	9.86041	79.7609	116.718	4.14206	-1.99076	-0.297646	4.0543	8.14462	11.7407	2.01627	19.1407	29.4225	3.95065	69.227	100.087
3.92189	40.9872	63.2203	9.86387	79.7587	116.711	4.14206	-2.09775	-0.61864	4.05805	7.889	11.7392	2.01627	19.2909	29.1077	3.96157	69.7324	100.073
3.92535	41.1161	63.6069	9.87078	78.9883	116.698	4.14206	-1.99076	-0.297646	4.06174	7.88851	11.7377	2.01627	19.2909	29.1077	3.96157	70.0437	101.007
3.92881	41.1147	63.6028	9.88115	78.9819	116.679	4.14964	-2.09844	-0.6207	4.06549	7.88801	11.7362	2.01627	19.2909	29.1077	3.96883	69.8329	100.375
3.93227	40.7277	63.2078	9.89843	78.8386	117.015	4.14589	-1.99111	-0.298698	4.06549	7.63291	11.7362	2.01627	19.2909	29.1077	3.96883	69.8329	100.375
3.93227	40.7277	63.2078	9.90189	78.8364	117.009	4.14964	-2.09844	-0.6207	4.06549	7.63291	11.7362	2.01627	19.2909	29.1077	3.96883	69.7854	100.997
3.9461	40.5917	62.7999	9.9088	78.7094	116.628	4.14964	-1.99145	-0.299731	4.06924	7.6324	11.7347	2.02354	19.2895	29.1036	3.96883	69.5303	100.997
3.94956	40.46	62.4047	9.92262	78.9562	116.602	4.15721	-2.09913	-0.622759	4.07292	7.63191	11.7332	2.02354	19.2895	29.1036	3.9725	69.7838	100.992
3.95647	40.4572	62.3964	9.92262	79.0789	116.97	4.15721	-2.09913	-0.622759	4.07292	7.3768	11.7332	2.02354	18.9295	28.7889	3.98342	69.5238	100.978
3.95647	40.4572	62.3964	9.93299	79.3278	116.951	4.16861	-1.84505	-0.625857	4.07668	7.3763	11.7317	2.03081	19.0331	29.0995	3.98708	69.5222	100.973
3.95993	40.4558	62.3923	9.94336	79.6996	117.3	4.16861	-1.84505	-0.625857	4.08786	7.3748	11.7272	2.03081	19.0331	29.0995	3.98708	69.5222	100.973
3.95993	40.5862	62.7833	9.95027	79.6953	117.287	4.16861	-1.84505	-0.625857	4.08786	7.3748	11.7272	2.03807	19.1366	29.41	3.99068	69.5206	100.968
3.95993	40.972	63.1745	9.95027	79.6953	117.287	4.16861	-1.95202	-0.946762	4.08786	7.3748	11.7272	2.03807	19.2415	29.7247	3.99068	69.0104	100.968
3.9634	40.8402	62.7792	9.95718	79.691	117.274	4.17244	-1.91118	-1.58957	4.08786	7.3748	11.7272	2.03807	19.2415	29.7247	3.99068	68.9067	100.657
3.97031	41.2284	63.9437	9.97446	79.6802	117.242	4.17244	-2.20747	-0.947788	4.09155	7.3743	11.7257	2.03807	18.7313	29.7247	3.99794	69.0072	100.959
3.97377	40.836	62.7667	9.98483	79.5511	116.854	4.18383	-2.20849	-0.950848	4.10649	7.62741	11.7197	2.03807	18.7313	29.7247	4.0016	69.7709	100.954
3.97377	41.227	63.9396	9.98483	79.3058	116.119	4.19523	-2.10257	-0.633091	4.10649	7.62741	11.7197	2.03807	18.7313	29.7247	4.01618	69.7645	100.935
3.97377	40.9715	63.9394	9.99866	79.2972	116.093	4.19523	-2.10257	-0.633091	4.10649	7.62741	11.7197	2.03807	18.8219	28.466	4.01618	69.8682	101.246
3.97723	40.9701	63.9352	10.0125	79.2887	116.067	4.20663	-1.78283	0.326145	4.11392	7.51799	11.3914	2.03807	18.8219	28.466	4.01978	69.8666	101.241
3.98414	40.9674	63.9269	10.0263	79.2801	116.042	4.20663	-2.1036	-0.636189	4.11392	7.51799	11.3914	2.03807	19.077	28.466	4.02344	69.865	101.236
3.9876	40.966	63.9227	10.0298	79.278	116.035	4.21038	-2.10394	-0.637209	4.11768	7.51749	11.3899	2.03807	19.0317	29.0954	4.02344	69.5062	100.925
3.9876	40.966	63.9227	10.0332	79.6437	117.132	4.21038	-2.10394	-0.637209	4.11768	7.51749	11.3899	2.03807	18.5215	29.0954	4.0307	69.5029	100.915
3.99106	40.9594	63.1369	10.0332	79.6437	117.132	4.21796	-2.10463	-0.639267	4.11768	7.51749	11.3899	2.04171	18.6257	29.408	4.03436	69.3976	100.599
3.99452	41.2135	63.1328	10.047	79.7576	117.474	4.22178	-1.84987	-0.640306	4.13255	7.29871	10.7336	2.04534	18.5201	29.0912	4.03436	69.3976	100.599
3.99452	41.2135	63.1328	10.0574	79.7511	117.454	4.22178	-1.84987	-0.640306	4.12886	7.04408	10.735	2.04534	18.5201	29.0912	4.03796	69.396	100.595
4.00143	40.9553	63.1245	10.0678	80.2453	118.171	4.2256	-2.36043	-0.641345	4.1363	7.04311	10.7321	2.0526	18.5187	29.0871	4.03796	69.4438	99.9725
4.00835	40.9525	63.1162	10.0747	80.2409	118.158	4.23318	-2.36112	-0.643403	4.14373	7.25892	11.3795	2.0526	19.0289	29.0871	4.04162	69.4422	99.9677
4.01181	40.6957	63.1119	10.0782	79.9834	118.151	4.23318	-2.10601	-0.643403	4.14373	7.25892	11.3795	2.05624	19.2834	29.0851	4.04162	69.6495	100.59
4.01181	40.5655	62.7212	10.0851	79.979	118.138	4.23318	-2.36112	-0.643403	4.14749	7.25842	11.378	2.0635	19.282	29.081	4.04162	69.6495	100.59
4.02219	40.5613	62.7086	10.092	80.2302	118.125	4.23318	-2.10601	-0.643403	4.14749	7.15003	11.0529	2.07077	19.3855	29.3914	4.05254	69.7484	100.886
4.02219	40.6915	63.0994	10.1093	80.2193	118.093	4.24076	-2.10669	-0.645461	4.15117	7.40466	11.0514	2.07077	18.8753	29.3914	4.05614	69.7468	100.882
4.02564	40.9456	63.0954	10.1162	79.9699	117.345	4.24458	-2.00016	-0.325849	4.15492	7.18741	10.3997	2.06713	18.6208	29.3935	4.05614	69.6431	100.571
4.02564	41.0757	63.4857	10.1265	80.4742	117.325	4.24458	-2.00016	-0.325849	4.16236	7.18644	10.3968	2.06713	18.6208	29.3935	4.06347	69.7436	100.872
4.0291	41.0743	63.4816	10.1334	80.4699	117.312	4.24833	-2.0005	-0.326881	4.16236	7.18644	10.3968	2.07077	18.725	29.706	4.06347	69.7436	100.872
4.03256	41.1982	63.0871	10.1404	80.5882	117.667	4.25215	-2.00085	-0.327933	4.16236	7.14807	11.047	2.06713	18.6208	29.3935	4.07439	69.7387	100.857
4.03948	41.0702	63.4691	10.1473	80.5838	117.654	4.25215	-2.00085	-0.327933	4.16236	7.14807	11.047	2.07077	18.5153	29.0768	4.07798	69.4821	100.853
4.03948	40.94	63.0786	10.1576	80.5773	117.635	4.25598	-2.0012	-0.328984	4.1773	7.25445	11.3661	2.07077	19.0255	29.0768	4.07798	69.5857	101.164
4.04986	40.9359	63.0662	10.1749	79.545	117.602	4.25598	-2.0012	-0.328984	4.1773	7.50956	11.3661	2.07803	19.3247	28.4436	4.08165	69.5841	101.159
4.04986	41.066	63.4566	10.1749	79.545	117.602	4.26738	-1.85399	-0.652693	4.1773	7.36281	11.6912	2.08166	19.324	28.4416	4.08524	69.6861	101.465
4.04986	41.3265	64.238	10.1784	79.9312	117.229	4.2787	-1.74817	-0.335234	4.18848	7.61642	11.6867	2.08166	19.5337	29.0707	4.08165	69.5841	101.159
4.05331	41.3251	64.2338	10.1922	80.4334	117.203	4.2787	-1.74817	-0.335234	4.19217	7.61592	11.6852	2.08166	19.5337	29.0707	4.08524	69.5825	101.154
4.05331	41.325	64.2337	10.2026	80.0385	117.55	4.2787	-1.74817	-0.335234	4.18848	7.14463	11.0367	2.08893	19.5323	29.0665	4.08524	69.4789	100.843
4.05677	41.3237	64.2296	10.206	80.0364	117.544	4.2787	-2.25839	-0.335234	4.19592	7.14365	11.0337	2.08893	19.382	29.3811	4.08891	69.3736	100.527
4.06369	41.0604	63.4399	10.2164	79.7852	116.791	4.28253	-2.25874	-0.336285	4.20711	7.03386	10.7043	2.08893	19.5323	29.0665	4.09616	69.6255	100.518
4.06715	41.3144	63.4356	10.2233	80.0255	117.512	4.2901	-2.76965	-0.338368	4.20711	7.03386	10.7043	2.08893	19.5323	29.0665	4.09616	68.8602	100.518
4.06715	41.3144	63.4357	10.2406	79.7701	116.745	4.2901	-2.87648	-0.658866	4.20711	7.03386	10.7043	2.08893	18.8718	29.3811	4.09983	69.3688	100.513
4.0706	41.0528	62.6507	10.244	79.768	116.739	4.29775	-2.58061	-1.30189	4.20711	7.03386	10.7043	2.08893	18.8718	29.3811	4.10349	69.3672	100.508
4.08098	41.3089	63.419	10.2475	79.8881	117.099	4.3015	-1.81561	-1.30288	4.20711	7.07233	10.0544	2.08893	19.6371	29.3811	4.11075	69.6191	100.498
4.08444	41.1822	63.8053	10.2648	79.8773	117.067	4.30532	-2.6881	-1.62434	4.20711	7.03386	10.7043	2.0962	18.8704	29.3769	4.12527	69.3576	100.479
4.09136	41.0493	63.4065	10.2752	79.8708	117.047	4.30532	-1.92277	-1.62434	4.2183	6.26706	10.7	2.0962	19.1255	29.3769	4.12527	69.8678	100.479
4.09136	41.0493	63.4065	10.2786	79.6024	117.775	4.32048	-2.11391	-0.667115	4.2183	7.03239	10.7	2.09983	19.6351	29.3748	4.12527	69.9714	100.79
4.09481	40.5372	63.4022	10.289	79.4738	117.389	4.3243	-2.11426	-0.668153	4.23317	7.28556	10.6941	2.09983	19.6351	29.3748	4.12893	70.1213	100.474
4.09481	40.6674	63.7928	10.289	79.5961	117.756	4.32812	-2.1146	-0.669191	4.23692	7.02996	10.6927	2.09983	19.1248	29.3748	4.13259	69.4579	100.78
4.10173	41.1753	63.7845	10.3028	79.5874	117.73	4.33187	-2.11494	-0.67021	4.2406	7.13776	11.0161	2.09983	19.38	29.3748	4.13259	69.1472	99.848
4.10173	41.1753	63.7845	10.3063	79.5852	117.723	4.3357	-2.11529	-0.671248	4.2406	7.13776	11.0161	2.09983	19.38	29.3748	4.13259	69.1472	99.848
4.10519	41.4341	64.5609	10.3132	80.0918	117.71	4.3357	-2.3704	-0.671248	4.24436	6.62705	11.0146	2.10347	19.1242	29.3728	4.13619	69.1456	99.8433
4.10519	41.4341	64.5609	10.3235	80.0853	117.691	4.3357	-2.26362	-0.350903	4.24811	6.62655	11.0131	2.09983	18.8697	29.3748	4.13619	69.3528	100.465
4.10865	41.4327	64.5567	10.3408	79.9521	117.291	4.34327	-2.05076	0.287655	4.24811	6.41001	10.3635	2.10347	18.869	29.3728	4.14345	69.6047	100.455
4.1121	41.041	63.3815	10.3477	79.9478	117.278	4.34327	-2.05076	0.287655	4.25554	6.40904	10.3606	2.1071	18.8684	29.3707	4.15803	69.8054	101.057
4.12594	41.0354	63.3648	10.3477	80.081	116.912	4.34327	-2.05076	0.287655	4.25554	6.66415	10.3606	2.1071	18.6587	28.7418	4.15803	69.8054	101.057
4.1294	41.034	63.3605	10.3477	80.2033	117.279	4.35467	-2.26536	-0.356118	4.26298	6.66319	10.3577	2.11073	19.3779	29.3686	4.15803	69.8054	101.057
4.13286	41.0326	63.3564	10.365	80.1924	117.246	4.35849	-2.26571	-0.357169	4.27041	6.66223	10.3548	2.11073	19.3779	29.3686	4.16169	69.8037	101.052
4.13286	41.1627	63.7468	10.3685	80.4346	117.973	4.35849	-2.26571	-0.357169	4.27041	6.66223	10.3548	2.11073	19.1683	28.7397	4.16169	69.8037	101.052
4.13632	41.1613	63.7425	10.3788	80.1726	117.953	4.36225	-2.01094	-0.358201	4.27417	6.91685	10.3533	2.11073	19.1228	29.3686	4.16529	69.8022	101.048
4.13977	41.1599	63.7383	10.3788	80.1727	117.953	4.37364	-2.01198	-0.361333	4.27792	6.91637	10.3519	2.11073	19.1228	29.3686	4.17255	69.7989	101.038
4.14323	41.0284	63.3438	10.3961	80.1619	117.921	4.37747	-1.79886	0.278028	4.2816	6.91589	10.3505	2.11073	19.1228	29.3686	4.17255	69.6954	100.727
4.15015	40.9003	63.7258	10.4065	80.4107	117.901	4.37747	-1.79886	0.278028	4.28911	6.91492	10.3475	2.11437	18.7622	29.0521	4.18347	69.6906	100.713
4.15015	40.9003	63.7258	10.4168	80.6596	117.881	4.37747	-1.79886	0.278028	4.28911	6.91492	10.3475	2.118	18.8663	29.3645	4.18713	69.689	100.708
4.15707	40.8975	63.7174	10.4203	80.6575	117.875	4.38504	-2.16141	-0.0442854	4.28911	6.65981	10.3475	2.1289	19.1193	29.3583	4.18713	69.689	100.708
4.15707	41.1529	63.7174	10.4238	80.5333	117.503	4.38504	-2.26814	-0.364466	4.29279	6.14911	10.3461	2.12163	18.6105	29.3624	4.18713	70.1992	100.708
4.15707	41.283	64.1077	10.4376	80.7688	118.209	4.38504	-2.26814	-0.364466	4.29279	6.65933	10.3461	2.13253	19.1186	29.3562	4.18713	68.9237	100.708
4.16053	41.2816	64.1035	10.448	80.7622	118.189	4.38887	-2.26849	-0.365516	4.29279	6.14911	10.3461	2.13616	19.1179	29.3541	4.19439	68.9204	100.698
4.16053	41.2816	64.1035	10.4583	80.7557	118.17	4.39262	-2.26883	-0.366548	4.29279	5.894	10.3461	2.13616	19.1179	29.3541	4.19439	69.4306	100.698
4.16744	42.045	64.095	10.4618	79.9874	118.163	4.39262	-2.26883	-0.366548	4.29654	6.14863	10.3446	2.13616	19.1179	29.3541	4.19806	69.429	100.694
4.16744	42.045	64.0951	10.4756	79.7233	118.137	4.39262	-2.01372	-0.366548	4.30398	6.65788	10.3418	2.13616	18.8036	28.411	4.20165	69.4274	100.689
4.17436	42.0422	64.0866	10.4894	79.8366	118.477	4.40784	-2.01512	-0.37073	4.30773	6.6574	10.3403	2.13616	19.1179	29.3541	4.20531	69.4258	100.684
4.18127	42.0394	64.0783	10.4894	79.7146	118.111	4.41159	-2.01546	-0.371762	4.31516	6.65644	10.3374	2.13616	19.1179	29.3541	4.20898	69.4242	100.679
4.18127	41.5286	64.0783	10.4998	79.708	118.092	4.41542	-2.01581	-0.372812	4.31892	7.16617	10.336	2.13616	19.1179	29.3541	4.2199	69.9296	100.665
4.18127	41.7886	64.8582	10.5033	79.7059	118.085	4.41542	-2.2292	-1.01297	4.31892	6.84159	9.36223	2.13616	19.1179	29.3541	4.22349	69.8245	100.349
4.18127	41.7886	64.8582	10.5102	80.0789	118.438	4.41542	-1.97409	-1.01297	4.3226	6.33091	9.36084	2.13616	19.3731	29.3541	4.22716	69.9264	100.655
4.19165	41.5244	64.0657	10.5205	80.3163	119.15	4.41542	-2.01581	-0.372812	4.3226	6.33091	9.36084	2.13979	19.4772	29.6664	4.22716	69.8229	100.345
4.19511	41.523	64.0614	10.524	80.8249	119.143	4.41924	-2.01616	-0.373862	4.33004	6.32997	9.35803	2.14343	19.3717	29.35	4.23442	69.8197	100.335
4.19511	41.6484	63.6713	10.5378	80.8161	119.117	4.43057	-2.0172	-0.376975	4.33004	6.22179	9.03349	2.15069	19.3703	29.3459	4.23442	69.6127	99.7141
4.19511	41.6484	63.6713	10.5482	80.6876	118.732	4.43439	-2.01755	-0.378025	4.34122	6.32856	9.3538	2.15069	19.6254	29.3459	4.23442	69.1025	99.7141
4.20894	41.6428	63.6546	10.5655	80.1659	118.699	4.43821	-1.91123	-0.0590731	4.34122	6.83878	9.3538	2.15796	19.624	29.3417	4.23442	69.1025	99.7141
4.2124	41.6414	63.6504	10.5724	80.0397	118.32	4.44197	-1.91158	-0.0601167	4.34122	6.83878	9.3538	2.15796	19.624	29.3417	4.23808	69.3079	100.33
4.2124	41.386	63.6504	10.5724	80.1616	118.686	4.44579	-1.91193	-0.0611797	4.35241	7.05368	9.99849	2.15796	19.624	29.3417	4.23808	69.1009	99.7093
4.2124	41.386	63.6504	10.5897	80.1507	118.653	4.44579	-1.91193	-0.0611797	4.35616	7.0532	9.99705	2.15796	19.5193	29.0274	4.24534	69.3047	100.321
4.2124	41.386	63.6504	10.5897	80.406	118.653	4.45336	-2.01929	-0.383238	4.35985	6.2874	9.99563	2.16522	19.6226	29.3376	4.2526	69.3015	100.311
4.21586	41.5146	64.0362	10.6	80.9103	118.634	4.46094	-2.01998	-0.385319	4.35985	6.2874	9.99563	2.16522	19.5179	29.0233	4.2526	69.3015	100.311
4.22278	41.2564	64.0279	10.6	80.9103	118.634	4.46094	-2.33991	-1.3451	4.35985	6.2874	9.99563	2.16885	19.1117	29.3355	4.25626	69.4033	100.616
4.23661	40.7401	64.011	10.6139	81.4123	118.607	4.46094	-2.33991	-1.3451	4.35985	6.2874	9.99563	2.16885	19.1117	29.3355	4.26718	69.1434	100.602
4.23661	40.87	64.4006	10.6277	80.8929	118.581	4.46094	-2.12662	-0.705245	4.35985	6.03229	9.99563	2.16885	18.8566	29.3355	4.26718	69.1434	100.602
4.23661	40.7401	64.0111	10.6311	81.0125	118.94	4.46476	-2.27544	-0.386369	4.35985	5.92414	9.67119	2.16885	18.8566	29.3355	4.26718	69.1434	100.602
4.24007	40.7387	64.0068	10.6484	80.4908	118.907	4.47234	-2.02102	-0.38845	4.37103	6.03085	9.99132	2.17249	18.9607	29.6477	4.26718	69.3985	100.602
4.24353	40.7373	64.0026	10.6484	80.4908	118.908	4.48374	-2.27718	-0.391581	4.37479	6.28548	9.98988	2.17249	19.111	29.3334	4.26718	69.2951	100.292
4.25044	40.9898	63.9942	10.6553	80.7299	119.625	4.48374	-2.27718	-0.391581	4.37854	6.285	9.98843	2.17249	19.111	29.3334	4.27078	69.2935	100.287
4.2539	40.9884	63.99	10.6588	80.9831	119.618	4.48756	-2.42601	-0.0727937	4.38597	6.28404	9.98557	2.17612	19.0056	29.0171	4.2817	69.3921	100.583
4.2539	41.2438	63.99	10.6657	80.7353	118.875	4.48756	-2.42601	-0.0727937	4.39341	6.28309	9.98271	2.17976	19.1097	29.3293	4.28536	69.3905	100.578
4.2539	41.1182	64.3795	10.6899	80.72	118.829	4.48756	-2.63924	-0.712468	4.40085	6.28214	9.97985	2.18339	19.109	29.3272	4.28896	69.4923	100.883
4.26082	41.3709	64.3712	10.6899	80.5983	118.464	4.49131	-2.12937	-0.713486	4.40085	6.17404	9.65555	2.18339	18.7491	29.013	4.28896	69.4923	100.883
4.26082	41.3708	64.3711	10.7037	80.3341	118.437	4.49131	-2.02276	-0.393662	4.40085	6.02703	9.97985	2.18339	18.8539	29.3272	4.28896	69.4923	100.883
4.26428	41.2396	63.9774	10.7106	80.4515	118.789	4.49896	-2.02346	-0.395761	4.40835	6.17308	9.65269	2.18339	19.2137	29.6415	4.28896	69.3889	100.573
4.26773	41.2382	63.9733	10.7175	80.4471	118.776	4.49896	-2.02346	-0.395761	4.4046	6.42867	9.65412	2.18339	18.8539	29.3272	4.28896	69.3889	100.573
4.2712	41.4922	63.969	10.721	80.9558	118.77	4.51036	-2.17303	-0.079131	4.4046	5.66334	9.65412	2.18702	19.213	29.6394	4.30354	68.8722	100.554
4.2712	41.4922	63.969	10.7279	80.9514	118.757	4.51411	-2.17337	-0.0801742	4.41947	5.91656	9.64845	2.19066	19.2123	29.6373	4.30721	68.7189	100.859
4.27811	41.4894	63.9605	10.7383	80.9448	118.737	4.51411	-2.17337	-0.0801742	4.41947	6.17167	9.64845	2.19792	19.2109	29.6331	4.31446	68.7157	100.85
4.27811	41.4894	63.9606	10.7521	80.9361	118.711	4.52168	-2.28065	-0.402003	4.41947	6.17167	9.64845	2.19792	18.9558	29.6331	4.31806	68.9209	101.465
4.28503	41.9974	63.9521	10.759	80.4209	118.698	4.52933	-1.96165	0.554989	4.42322	6.17119	9.64702	2.19792	19.2109	29.6331	4.32172	68.9193	101.46
4.28849	41.996	63.948	10.7694	80.536	119.043	4.52933	-2.02624	-0.404102	4.42697	6.17071	9.64558	2.19792	19.2109	29.6331	4.32539	68.9176	101.455
4.2954	41.9932	63.9396	10.7728	80.6553	119.401	4.52933	-2.02624	-0.404102	4.43066	6.17025	9.64418	2.19792	19.2109	29.6331	4.32539	68.6075	100.525
4.29886	41.9918	63.9354	10.7797	80.9064	119.388	4.53308	-2.53679	-0.405133	4.43816	6.16929	9.64132	2.20519	19.2096	29.629	4.32539	68.6075	100.525
4.29886	41.9918	63.9353	10.7867	80.7805	119.01	4.53308	-2.02658	-0.405133	4.43816	5.91418	9.64132	2.20519	19.2096	29.629	4.32539	68.6075	100.525
4.30232	41.9904	63.9312	10.797	81.0292	118.99	4.53691	-2.02693	-0.406182	4.43816	5.91418	9.64132	2.20882	19.2089	29.6269	4.32539	68.6075	100.525
4.30232	41.9904	63.9312	10.8109	81.0205	118.964	4.54073	-2.38895	-0.726891	4.43816	5.80613	9.31715	2.20882	19.2089	29.6269	4.33631	68.706	100.821
4.30578	41.7336	63.9269	10.8143	80.8967	118.593	4.5483	-2.13452	-0.728946	4.43816	5.80613	9.31715	2.21245	19.2082	29.6248	4.34357	68.9579	100.811
4.30924	41.7322	63.9227	10.8281	80.888	118.567	4.55206	-2.02832	-0.410343	4.4456	5.80519	9.31433	2.21609	18.9524	29.6227	4.34357	69.213	100.811
4.3127	41.6052	64.3079	10.8316	81.1411	118.56	4.55588	-2.02867	-0.411392	4.45303	5.80425	9.31152	2.21609	18.9524	29.6227	4.34716	68.853	100.496
4.31616	41.3527	65.0829	10.8385	81.1367	118.547	4.56728	-2.02971	-0.414522	4.46047	5.80331	9.30871	2.21609	18.9524	29.6227	4.34716	68.853	100.496
4.32307	41.3498	65.0743	10.8489	81.1302	118.527	4.5711	-2.03006	-0.415571	4.46047	5.58725	8.66052	2.21609	18.9524	29.6227	4.34716	69.1081	100.496
4.32307	41.3499	65.0744	10.8558	81.1258	118.514	4.5711	-2.03006	-0.415571	4.46797	5.80237	9.30588	2.21609	18.9524	29.6227	4.34716	68.853	100.496
4.32653	41.9891	65.4597	10.8592	81.2452	118.872	4.5711	-2.03006	-0.415571	4.47541	5.80143	9.30307	2.21609	19.2075	29.6227	4.35083	68.8514	100.491
4.32653	42.2445	65.4597	10.8731	80.9811	118.846	4.5711	-2.03006	-0.415571	4.47541	5.80143	9.30307	2.21609	19.2075	29.6227	4.36175	68.5914	100.477
4.32999	42.2431	65.4555	10.8731	80.9811	118.846	4.57485	-2.03041	-0.416601	4.47541	5.80143	9.30307	2.22335	19.2061	29.6186	4.36901	68.9951	100.157
4.33345	42.1118	65.0616	10.8973	80.9658	118.8	4.58243	-2.24411	-1.05772	4.48284	5.8005	9.30026	2.22335	19.2061	29.6186	4.37267	69.2486	100.152
4.33345	41.982	64.6721	10.9042	80.9488	119.515	4.59008	-1.9253	-0.101286	4.48284	5.8005	9.30026	2.22335	19.2061	29.6186	4.37267	69.1453	99.8423
4.34728	41.9763	64.6552	10.9111	80.823	119.138	4.59008	-2.0318	-0.42078	4.48284	5.18228	8.97624	2.22698	19.2054	29.6165	4.37993	68.9903	100.143
4.35074	42.1005	64.2615	10.9111	80.9444	119.502	4.59008	-2.0318	-0.42078	4.49403	5.69109	8.97205	2.22698	18.9503	29.6165	4.38359	68.9887	100.138
4.35074	41.9749	64.651	10.9214	80.9378	119.482	4.60523	-1.71374	0.533391	4.49403	5.69109	8.97205	2.23062	18.9496	29.6144	4.38719	68.9871	100.133
4.35766	42.2275	64.6425	10.9318	80.9313	119.463	4.60523	-1.96885	0.533391	4.49778	5.69062	8.97064	2.23062	18.9496	29.6144	4.38719	68.6835	100.753
4.35766	42.2275	64.6426	10.9387	80.9268	119.449	4.60905	-2.28865	-0.425988	4.49778	5.18041	8.97064	2.23062	19.2047	29.6144	4.39085	68.7852	101.058
4.35766	41.9763	65.4213	10.9456	80.9225	119.436	4.6128	-2.03388	-0.427018	4.50522	5.94481	8.96786	2.23788	19.2033	29.6102	4.39451	69.0387	101.053
4.35766	41.9763	65.4214	10.956	81.1713	119.416	4.60905	-2.03354	-0.425988	4.51265	5.68877	8.96507	2.24151	19.0979	29.2941	4.39451	69.0872	100.433
4.36803	41.9721	65.4086	10.9664	81.6627	120.125	4.6128	-2.03388	-0.427018	4.51641	5.6883	8.96367	2.24151	18.9933	28.9801	4.39811	69.0856	100.429
4.37149	41.9707	65.4044	10.9733	81.6583	120.112	4.6128	-2.03388	-0.427018	4.51641	5.6883	8.96367	2.24151	18.9933	28.9801	4.40177	68.9807	100.114
4.37841	41.7083	64.6172	10.9802	81.7751	120.462	4.6242	-2.03492	-0.430146	4.52384	5.68737	8.96088	2.24515	18.9926	28.978	4.40903	69.2326	100.104
4.38186	41.7068	64.6128	10.9871	81.7706	120.449	4.62045	-2.54479	-0.429116	4.52384	5.68737	8.96088	2.24878	18.9919	28.976	4.41269	68.9759	100.099
4.38878	41.704	64.6045	10.9871	81.4068	119.357	4.6242	-2.54513	-0.430146	4.52384	5.68737	8.96088	2.24878	18.9461	29.604	4.41269	69.231	100.099
4.3957	41.9566	64.596	11.0044	81.3958	119.324	4.63942	-2.54652	-0.434324	4.52384	5.68737	8.96088	2.25241	19.7108	29.6019	4.41629	69.3327	100.404
4.3957	41.9566	64.596	11.0044	81.3958	119.324	4.63942	-2.29142	-0.434324	4.52759	5.6869	8.95948	2.24878	18.7368	28.976	4.41995	69.331	100.4
4.39916	41.9552	64.5917	11.0251	80.8719	119.285	4.63942	-2.18498	-0.114995	4.53503	4.92065	8.95669	2.25241	19.0501	29.9159	4.42361	69.0743	100.395
4.39916	41.9552	64.5918	11.032	80.9888	119.635	4.647	-2.29212	-0.436403	4.53503	4.92065	8.95669	2.25968	19.0487	29.9117	4.42721	69.3278	100.39
4.39916	41.9552	64.5919	11.0459	80.9799	119.609	4.647	-2.24988	-1.07501	4.54247	4.91973	8.95391	2.25968	19.4543	29.5977	4.42721	69.3278	100.39
4.39916	41.6998	64.5917	11.0493	80.9778	119.602	4.647	-2.24988	-1.07501	4.54247	4.91973	8.95391	2.25968	19.3038	29.9117	4.43813	69.323	100.376
4.40262	41.6984	64.5875	11.0528	80.9756	119.596	4.647	-2.14344	-0.755706	4.54247	4.91973	8.95391	2.25968	19.3038	29.9117	4.43813	69.0679	100.376
4.40953	41.5658	64.1899	11.0597	80.9712	119.582	4.65082	-2.14379	-0.756742	4.5499	5.68412	8.95112	2.25968	19.3038	29.9117	4.43813	69.0679	100.376
4.41645	41.6927	64.5706	11.0597	81.4819	119.582	4.6584	-2.39958	-0.758795	4.55365	5.57572	8.62594	2.25968	19.3038	29.9117	4.4418	68.963	100.061
4.41645	41.6927	64.5706	11.0873	80.9535	119.529	4.6584	-2.18674	-0.120265	4.55741	5.83037	8.62455	2.26695	19.5117	30.5354	4.4418	68.963	100.061
4.41991	41.436	64.5665	11.0908	81.2067	119.523	4.66597	-2.18744	-0.122369	4.56852	5.9369	8.94415	2.26695	19.3024	29.9075	4.45272	68.9582	100.046
4.42683	41.5629	64.9472	11.1012	81.2001	119.503	4.66597	-2.18744	-0.122369	4.56852	5.68179	8.94415	2.26695	19.3024	29.9075	4.45631	68.9566	100.042
4.42683	41.5629	64.9472	11.1046	81.4533	119.496	4.67355	-2.29455	-0.443688	4.56852	5.68179	8.94415	2.26695	19.3024	29.9075	4.45631	69.2117	100.042
4.42683	41.948	65.3363	11.115	81.1913	119.477	4.68495	-2.04048	-0.446815	4.57603	5.68086	8.94134	2.26695	19.1978	29.5936	4.46357	69.2085	100.032
4.43029	41.9425	64.5537	11.1219	81.5634	119.827	4.68495	-2.04048	-0.446815	4.57228	5.68133	8.94275	2.26695	18.9885	28.9657	4.46723	69.2069	100.027
4.43029	41.9425	64.5537	11.1288	81.559	119.814	4.68495	-2.29559	-0.446815	4.57971	5.6804	8.93996	2.27422	19.1964	29.5894	4.4709	69.2053	100.022
4.43374	41.9411	64.5495	11.1357	81.5546	119.8	4.69259	-2.04118	-0.448913	4.57971	5.6804	8.93996	2.27058	18.942	29.5915	4.47449	69.2037	100.018
4.44066	41.9383	64.5411	11.1461	81.548	119.781	4.69634	-2.04152	-0.449942	4.58722	5.57157	8.61349	2.27422	19.0459	29.9033	4.47816	68.9957	99.3936
4.45449	41.9326	64.5241	11.153	81.92	120.13	4.70392	-2.04221	-0.45202	4.58722	5.46368	8.28982	2.27785	19.0452	29.9012	4.47816	69.3053	100.323
4.45449	41.9326	64.5241	11.1565	82.0522	119.761	4.70392	-2.29732	-0.45202	4.59834	5.5702	8.60936	2.27785	18.535	29.9012	4.47816	69.3053	100.323
4.45795	42.0609	64.9089	11.1599	82.05	119.754	4.70774	-2.04256	-0.453069	4.60209	5.56973	8.60797	2.27785	18.535	29.9012	4.48542	69.4053	100.623
4.46141	42.0595	64.9048	11.1807	81.7813	119.714	4.71532	-1.9369	-0.136073	4.60584	5.31416	8.60658	2.29238	18.9378	29.579	4.49267	69.2989	100.303
4.46141	41.6784	65.2937	11.191	81.7747	119.695	4.70774	-1.9362	-0.133969	4.60584	5.20629	8.28298	2.29238	19.7031	29.579	4.49267	69.2989	100.303
4.47179	41.6741	65.281	11.1945	81.517	119.688	4.72296	-2.19272	-0.138196	4.60952	5.97117	8.28162	2.29238	19.7031	29.579	4.5	69.1438	100.603
4.47524	41.543	64.8877	11.1945	81.6381	120.051	4.72296	-1.93761	-0.138196	4.61328	5.97071	8.28024	2.29238	19.7031	29.579	4.5	69.1438	100.603
4.47524	41.543	64.8877	11.2187	81.878	120.004	4.72296	-2.19272	-0.138196	4.62446	5.86149	7.95259	2.29238	19.8077	29.8929	4.5036	69.1909	99.9793
4.4787	41.5377	64.1056	11.2221	81.8758	119.998	4.73054	-2.44852	-0.140299	4.62446	5.96934	8.27613	2.29238	19.2975	29.8929	4.5036	69.2941	100.289
4.48216	41.6622	63.7127	11.236	81.8669	119.971	4.73429	-2.3001	-0.460352	4.62446	6.07719	8.59967	2.29238	19.2975	29.8929	4.51452	69.3925	100.584
4.48216	41.6622	63.7127	11.236	82.3778	119.971	4.73429	-2.3001	-0.460352	4.62446	5.56697	8.59967	2.29238	19.2975	29.8929	4.51452	69.2893	100.274
4.48216	41.6622	63.7127	11.236	82.3777	119.971	4.73429	-2.81031	-0.460352	4.62446	5.78266	9.24675	2.29238	19.2975	29.8929	4.51818	69.0326	100.27
4.48908	41.9185	64.4818	11.2532	82.3667	119.938	4.73429	-2.81031	-0.460352	4.62446	5.78266	9.24675	2.30691	19.805	29.8845	4.52178	68.5208	100.265
4.49253	41.9172	64.4777	11.2602	82.3622	119.925	4.74569	-2.44992	-0.144505	4.63565	5.56558	8.59552	2.30691	19.805	29.8845	4.52178	68.4176	99.9552
4.49599	42.0454	64.8623	11.2602	81.4617	120.288	4.74569	-2.44992	-0.144505	4.64309	5.45684	8.26929	2.31054	19.8043	29.8824	4.52178	68.4176	99.9552
4.50291	42.0425	64.8537	11.2843	81.4462	120.241	4.76091	-2.45133	-0.148731	4.65052	5.56374	8.59	2.30328	19.1908	29.5728	4.52544	68.416	99.9504
4.50291	41.7871	64.8538	11.2947	81.4396	120.221	4.76091	-1.68601	-0.148731	4.65427	5.45547	8.26517	2.31054	18.9343	29.5686	4.5291	68.4144	99.9456
4.51329	41.7829	64.8411	11.2982	81.4374	120.215	4.76091	-1.68601	-0.148731	4.65427	5.45547	8.26517	2.31054	18.6792	29.5686	4.5327	69.1781	99.9408
4.51329	41.7829	64.841	11.312	81.5628	119.825	4.76466	-1.79266	-0.468682	4.65427	5.45547	8.26517	2.31054	18.993	30.51	4.5327	69.1781	99.9408
4.51675	41.6519	64.4481	11.312	81.5629	119.825	4.76091	-1.79231	-0.467652	4.65796	5.45502	8.26382	2.31417	18.6785	29.5665	4.54002	69.1749	99.9311
4.5202	41.7763	64.055	11.3224	81.8116	119.805	4.76466	-2.30288	-0.468682	4.65796	5.45502	8.26382	2.31417	19.1887	29.5665	4.54728	69.2748	100.231
4.51675	41.9073	64.448	11.3293	81.9281	120.155	4.76466	-2.55798	-0.468682	4.66915	5.19854	8.25971	2.31417	19.5025	30.5079	4.54728	69.1717	99.9215
4.52366	41.9045	64.4396	11.3362	81.9237	120.142	4.77989	-2.55937	-0.472856	4.66915	5.19854	8.25971	2.31781	19.5018	30.5058	4.55088	69.1701	99.9168
4.52712	42.0326	64.8241	11.3396	81.7869	120.497	4.77606	-2.45273	-0.152936	4.66915	5.19854	8.25971	2.31781	19.3513	30.8196	4.5618	69.2684	100.212
4.52712	42.0326	64.8241	11.3604	81.9082	120.095	4.77989	-2.30427	-0.472856	4.66915	5.19854	8.25971	2.32144	19.3506	30.8174	4.56546	69.1637	99.8975
4.53749	41.9026	65.2001	11.3707	81.9016	120.075	4.77989	-2.19798	-0.153997	4.67665	5.19762	8.25695	2.33234	19.3485	30.8111	4.57639	69.1589	99.8831
4.53749	41.9026	65.2002	11.3707	82.1569	120.075	4.78371	-2.19834	-0.155058	4.69152	5.45091	8.25149	2.33234	19.0934	30.8111	4.57639	69.1589	99.8831
4.53749	42.4134	65.2001	11.3742	82.2755	120.431	4.79128	-2.30531	-0.475981	4.69152	5.34314	7.92818	2.33234	19.0934	30.8111	4.57998	69.0053	100.188
4.53749	41.9026	65.2002	11.3949	82.5176	120.391	4.79128	-2.30531	-0.475981	4.69527	5.34268	7.92681	2.33234	18.7796	29.8699	4.57998	68.7502	100.188
4.54787	42.4091	65.1872	11.3949	82.773	120.391	4.79504	-2.30565	-0.47701	4.69896	5.34223	7.92547	2.33234	18.5245	29.8699	4.57998	68.7502	100.188
4.55133	42.4077	65.1831	11.3949	82.2622	120.391	4.79504	-2.30565	-0.47701	4.69896	5.34223	7.92547	2.33234	18.5245	29.8699	4.58364	68.4935	100.183
4.55479	41.8918	64.4015	11.4122	82.7619	120.358	4.79504	-2.30565	-0.47701	4.70271	5.34178	7.9241	2.33234	18.5245	29.8699	4.5909	69.0546	101.101
4.55479	42.1509	65.1789	11.4191	82.7574	120.344	4.80268	-2.30635	-0.479106	4.70646	5.34132	7.92274	2.33597	18.5238	29.8678	4.5909	69.1036	100.482
4.55825	42.0199	64.786	11.4295	82.3747	119.962	4.81408	-2.71136	-0.163488	4.70646	5.34132	7.92274	2.33597	19.034	29.8678	4.59823	69.3554	100.473
4.55825	42.1494	65.1745	11.4364	82.1149	119.949	4.81408	-2.8176	-0.482231	4.71014	5.34088	7.9214	2.34324	19.2878	29.8636	4.59823	69.3554	100.473
4.5617	42.148	65.1703	11.4399	82.354	120.666	4.82166	-3.07341	-0.484308	4.72133	5.33952	7.91732	2.34324	19.0326	29.8636	4.60549	69.3522	100.463
4.5617	42.4034	65.1703	11.4537	82.3451	120.64	4.82166	-3.07341	-0.484308	4.72133	5.84974	7.91732	2.34687	19.2871	29.8615	4.60908	69.0955	100.458
4.56862	42.1452	65.1619	11.4641	82.5938	120.619	4.82541	-3.07375	-0.485337	4.72133	5.84974	7.91732	2.34687	19.032	29.8615	4.60549	68.842	100.463
4.57208	42.1438	65.1575	11.4675	82.5916	120.613	4.83306	-3.07445	-0.487433	4.72508	5.59417	7.91596	2.34687	19.5422	29.8615	4.60908	68.8404	100.458
4.57554	42.1424	65.1533	11.4744	82.5871	120.599	4.83306	-3.07445	-0.487433	4.73252	5.2985	8.5596	2.34687	19.032	29.8615	4.60908	68.7373	100.149
4.57899	42.1409	65.149	11.4779	82.4644	120.231	4.83306	-3.07445	-0.487433	4.73627	5.59282	7.91189	2.35051	19.0313	29.8594	4.61275	69.0939	100.453
4.58592	42.1381	65.1406	11.4952	82.4532	120.198	4.83306	-2.75577	0.468608	4.73995	5.08215	7.91055	2.35051	19.1358	30.1731	4.62367	68.986	100.13
4.58937	42.1367	65.1363	11.5021	82.3139	120.546	4.83681	-3.07479	-0.488462	4.73995	5.08215	7.91055	2.35777	19.1344	30.1689	4.62367	68.986	100.13
4.59629	42.3893	65.1278	11.509	82.0541	120.533	4.85578	-2.5663	-0.493663	4.74371	5.4842	7.58604	2.35051	19.1358	30.1731	4.62367	68.986	100.13
4.59975	42.3878	65.1235	11.5194	81.9127	120.875	4.85578	-2.3112	-0.493663	4.74739	5.48376	7.58472	2.36141	18.6235	30.1668	4.63819	68.9796	100.111
4.59975	42.1324	65.1235	11.5263	81.9082	120.861	4.85578	-2.205	-0.175059	4.74739	5.63116	7.26159	2.36141	18.6235	30.1668	4.63819	69.2347	100.111
4.60321	42.131	65.1193	11.5332	82.0385	120.486	4.85578	-2.5663	-0.493663	4.75489	5.73797	7.58201	2.36141	18.6235	30.1668	4.64185	69.2331	100.106
4.60321	42.5158	65.5073	11.5366	82.0363	120.479	4.85578	-2.3112	-0.493663	4.75858	5.73752	7.58068	2.36141	18.519	29.8531	4.64185	69.027	99.4875
4.60666	42.0036	65.5031	11.5539	82.0252	120.446	4.85578	-2.3112	-0.493663	4.75858	5.84522	7.90377	2.36141	18.519	29.8531	4.64551	69.0254	99.4827
4.61012	42.2575	65.4988	11.5574	82.023	120.44	4.85961	-2.56665	-0.494711	4.76233	5.84476	7.9024	2.36141	19.2843	29.8531	4.65277	69.0222	99.4731
4.61012	42.5129	65.4988	11.5677	82.1368	120.781	4.86718	-2.31225	-0.496787	4.76608	5.5892	7.90104	2.36504	19.2836	29.851	4.65277	69.2283	100.091
4.61704	42.2547	65.4903	11.585	82.1257	120.748	4.87858	-2.31329	-0.499911	4.76977	5.2939	8.54579	2.36504	19.0285	29.851	4.65277	69.2283	100.091
4.61704	42.1254	65.1023	11.585	82.1257	120.748	4.87858	-2.31329	-0.499911	4.76977	5.0388	8.54579	2.36504	18.9239	29.5374	4.65643	69.4817	100.086
4.61704	42.2547	65.4903	11.5919	82.1212	120.734	4.88616	-2.20781	-0.183485	4.77352	5.03833	8.5444	2.36867	19.538	29.8489	4.66369	68.9683	100.077
4.62396	42.5072	65.4817	11.5919	82.7526	121.096	4.88616	-2.20781	-0.183485	4.7772	5.03788	8.54303	2.3723	19.5373	29.8468	4.67095	68.71	100.067
4.63087	42.5044	65.4733	11.5989	82.4927	121.083	4.8938	-2.20852	-0.185605	4.78095	5.03741	8.54164	2.3723	19.5373	29.8468	4.67095	68.71	100.067
4.63087	42.5044	65.4732	11.6265	82.4748	121.029	4.8938	-2.20852	-0.185605	4.78839	4.71351	7.56993	2.37594	19.4321	29.5312	4.67095	68.71	100.067
4.63087	42.5079	66.2499	11.6334	82.7258	121.015	4.88998	-2.20816	-0.184545	4.79589	4.96771	7.56723	2.37957	19.5359	29.8427	4.67461	68.7084	100.062
4.63433	42.503	65.469	11.6369	82.4681	121.009	4.88998	-2.52665	-1.14001	4.79589	4.96771	7.56723	2.37957	19.0257	29.8427	4.67461	68.3994	99.1353
4.64471	42.2433	65.4562	11.6438	82.4636	120.995	4.89755	-2.52733	-1.14204	4.79958	5.47749	7.5659	2.37957	19.0257	29.8427	4.67821	68.6529	99.1306
4.64816	42.5007	66.2284	11.6507	82.4592	120.982	4.90138	-2.20922	-0.187707	4.81076	5.47614	7.56187	2.39047	19.2787	29.8364	4.68554	68.9048	99.121
4.65509	42.4979	66.2198	11.6611	82.4526	120.962	4.90138	-2.31537	-0.506158	4.81076	4.96592	7.56187	2.39047	19.2787	29.8364	4.68554	68.9048	99.121
4.65509	42.1098	65.0555	11.6611	82.4525	120.962	4.9052	-2.82593	-0.507206	4.81076	4.71082	7.56187	2.39047	19.2787	29.8364	4.68913	69.2122	100.043
4.65854	42.4964	66.2154	11.668	82.6888	121.671	4.90895	-2.82627	-0.508234	4.81076	4.96592	7.56187	2.39047	19.3832	30.1499	4.70005	69.2074	100.029
4.662	41.9775	64.6587	11.6853	82.9329	121.637	4.91277	-2.82662	-0.509281	4.81076	4.71082	7.56187	2.39047	18.3628	30.1499	4.70372	69.2596	100.951
4.66546	41.9761	64.6545	11.6956	82.9263	121.617	4.92417	-2.82766	-0.512405	4.81076	4.60319	7.23896	2.39047	18.3628	30.1499	4.70731	68.9491	100.019
4.66546	42.7455	65.4305	11.6991	82.924	121.61	4.92417	-2.67868	-0.83078	4.81076	4.60319	7.23896	2.3941	18.3621	30.1478	4.70731	68.9491	100.019
4.67238	42.7426	65.422	11.7129	82.9151	121.583	4.92793	-2.01982	-1.15016	4.8182	4.70993	7.55919	2.3941	18.3621	30.1478	4.71097	68.9475	100.014
4.67583	42.7412	65.4177	11.7129	82.6744	120.861	4.92793	-2.01982	-1.15016	4.82195	4.45437	7.55784	2.39773	18.3614	30.1457	4.71097	68.9475	100.014
4.68275	41.9723	65.4092	11.7267	82.6655	120.835	4.93557	-2.78582	-1.1522	4.82195	4.34675	7.23497	2.40136	18.3607	30.1436	4.71097	68.9475	100.014
4.68275	41.9723	65.4092	11.7302	82.6633	120.828	4.93932	-2.02083	-1.1532	4.8257	4.13106	6.58791	2.40136	18.3607	30.1436	4.71464	68.9458	100.009
4.68967	41.9694	65.4006	11.7406	82.6566	120.808	4.93932	-2.12694	-1.47153	4.8257	4.13106	6.58791	2.405	18.569	30.7685	4.71823	68.9443	100.005
4.69659	42.0927	65.0043	11.7406	82.1458	120.808	4.9469	-2.38272	-1.47353	4.83682	4.12976	6.58402	2.405	18.569	30.7685	4.72916	69.0424	100.299
4.70005	42.0913	65.0001	11.7544	82.6476	120.781	4.95072	-2.83009	-0.519678	4.83682	4.38487	6.58402	2.405	18.8241	30.7685	4.72916	69.5526	100.299
4.7035	42.0899	64.9959	11.7578	82.1347	120.774	4.95072	-2.57498	-0.519678	4.83682	4.38487	6.58402	2.40863	18.8695	30.1394	4.72916	69.5526	100.299
4.7035	42.0899	64.9958	11.7682	82.2481	121.115	4.95072	-2.57498	-0.519678	4.84433	4.45168	7.54977	2.40863	19.1246	30.1394	4.74008	69.2926	100.284
4.7035	42.2191	65.3836	11.782	82.4946	121.088	4.95455	-2.57533	-0.520726	4.8592	4.38226	6.57618	2.41226	19.0194	29.8238	4.74374	69.5461	100.28
4.7035	42.2191	65.3836	11.7924	83.1338	120.707	4.96594	-2.57637	-0.523848	4.86295	4.12671	6.57487	2.4159	19.0187	29.8217	4.74374	69.291	100.28
4.70696	42.2177	65.3793	11.8028	83.1271	120.687	4.96594	-2.57637	-0.523848	4.86663	4.12628	6.57358	2.4159	19.1232	30.1352	4.74734	68.9314	99.966
4.71388	42.5996	65.7588	11.8062	83.1248	120.681	4.9697	-2.57671	-0.524876	4.86663	4.12628	6.57358	2.4159	19.0187	29.8217	4.751	69.2386	100.887
4.71734	42.5982	65.7545	11.8166	83.1181	120.66	4.9697	-2.57671	-0.524876	4.86663	4.12628	6.57358	2.42316	18.8667	30.131	4.75826	68.9266	99.9516
4.72079	42.5968	65.7503	11.8235	83.1138	120.647	4.97727	-2.47133	-0.208754	4.86663	4.23386	6.8963	2.4268	18.866	30.1289	4.76552	68.9234	99.942
4.72425	42.5953	65.7458	11.8235	82.8433	121.368	4.9811	-2.21659	-0.209814	4.87782	4.3401	7.21502	2.42316	18.8667	30.131	4.76552	68.9234	99.942
4.72425	42.5953	65.7459	11.8373	82.9545	121.702	4.98492	-2.21694	-0.210873	4.87414	4.23297	6.89364	2.43043	18.9697	30.4402	4.76917	68.9218	99.9371
4.72771	42.5939	65.7417	11.8373	82.8344	121.341	4.98867	-2.21729	-0.211914	4.87782	3.97743	6.89234	2.42316	19.2263	30.4444	4.77281	68.9202	99.9323
4.73117	42.5925	65.7374	11.8581	82.9411	121.661	4.98867	-2.21729	-0.211914	4.88157	4.29965	7.85901	2.43043	19.3755	30.1268	4.77281	68.7144	99.3149
4.73463	42.591	65.733	11.865	83.0565	122.008	4.99249	-2.11159	0.105173	4.88901	4.08366	7.21103	2.43043	18.9114	29.5	4.77281	68.8173	99.6236
4.73463	42.7204	66.1211	11.8754	83.0499	121.988	5.00389	-2.11266	0.101975	4.89276	4.08321	7.20969	2.43043	18.9114	29.5	4.77645	69.3259	99.6188
4.73809	42.8481	66.5043	11.8823	83.0454	121.974	5.00389	-2.11266	0.101975	4.9002	4.08232	7.20703	2.43406	18.9107	29.4979	4.77645	68.9186	99.9275
4.74155	42.8466	66.4999	11.8823	83.0454	121.974	5.00389	-2.11266	0.101975	4.9002	4.08232	7.20703	2.43406	19.421	29.4979	4.78736	69.3211	99.6044
4.74846	42.5884	66.4914	11.8892	83.2962	121.961	5.00765	-2.11301	0.100922	4.90763	4.33655	7.20438	2.43406	19.1197	30.1247	4.791	69.4223	99.9082
4.75538	42.5856	66.4829	11.9099	83.2827	121.92	5.01147	-2.68655	-0.854399	4.91139	4.3361	7.20304	2.44133	19.6285	30.1205	4.791	69.4223	99.9082
4.75538	42.2009	66.0952	11.9134	83.0405	121.193	5.01904	-2.68723	-0.856448	4.91139	4.3361	7.20304	2.44133	19.733	30.4339	4.79464	69.4207	99.9034
4.75884	42.0702	65.703	11.9237	83.0338	121.173	5.02669	-2.68792	-0.858516	4.91514	4.33566	7.2017	2.44496	19.9874	30.4318	4.79828	69.522	100.207
4.76229	42.0688	65.6988	11.9307	83.0292	121.16	5.02669	-2.68792	-0.858516	4.91882	4.22771	6.87785	2.44496	19.3265	30.7451	4.80191	68.5	100.202
4.76575	42.0674	65.6945	11.9341	83.027	121.153	5.02669	-2.68792	-0.858516	4.91882	4.33522	7.20039	2.44496	19.222	30.4318	4.80191	68.5	100.202
4.76922	42.8321	65.6903	11.9479	83.0181	121.126	5.03426	-2.5826	-0.542559	4.92257	4.22726	6.87652	2.4486	19.3258	30.743	4.80919	68.4474	100.81
4.76922	43.0875	65.6903	11.9479	83.5288	121.126	5.03044	-2.58225	-0.541512	4.92257	4.52245	6.23146	2.4486	19.2213	30.4296	4.81646	68.4442	100.8
4.77267	43.086	65.686	11.9652	83.5175	121.092	5.03426	-2.5826	-0.542559	4.92257	4.22726	6.87652	2.4486	19.0707	30.743	4.81646	68.4442	100.8
4.77959	42.5725	65.6775	11.9756	82.8647	121.432	5.03426	-2.5826	-0.542559	4.93001	4.22639	6.87389	2.4486	18.9662	30.4296	4.81646	68.4442	100.8
4.77959	43.2124	66.0652	11.9825	82.9956	121.059	5.03426	-2.5826	-0.542559	4.93001	4.01138	6.22888	2.4486	18.9662	30.4296	4.81646	68.2385	100.183
4.78305	42.7003	66.0608	11.9859	82.9934	121.052	5.04566	-3.09386	-0.54568	4.93001	4.01138	6.22888	2.4486	18.9662	30.4296	4.81646	68.2385	100.183
4.78651	42.6989	66.0566	11.9998	82.729	121.025	5.04942	-2.58399	-0.546708	4.9412	4.22507	6.86994	2.45586	18.9648	30.4254	4.82374	68.2352	100.173
4.79688	42.6946	66.0438	12.0171	82.7178	120.992	5.05324	-2.58433	-0.547754	4.94495	4.22463	6.86861	2.45586	19.2199	30.4254	4.82738	68.2336	100.169
4.79688	42.6946	66.0438	12.0171	82.9732	120.992	5.05324	-2.58433	-0.547754	4.94863	3.96908	6.86731	2.45949	19.2192	30.4233	4.83102	68.9973	100.164
4.8038	42.6917	66.0352	12.0171	83.0932	121.351	5.05706	-2.58468	-0.548801	4.95238	3.96864	6.86598	2.45949	19.2192	30.4233	4.83102	68.232	100.164
4.8038	42.3071	65.6475	12.0412	83.0775	121.304	5.06081	-2.64784	-1.50358	4.95607	3.96821	6.86468	2.46313	19.2185	30.4212	4.83102	68.9973	100.164
4.81072	42.3042	65.6388	12.0412	83.0775	121.304	5.06839	-2.64851	-1.50558	4.95607	3.75326	6.21985	2.46676	19.3222	30.7324	4.84193	68.7374	100.149
4.81072	42.4304	65.2512	12.0447	83.195	121.657	5.06839	-2.54255	-1.18769	4.96357	3.7524	6.21725	2.47039	18.5562	30.7302	4.84193	68.7374	100.149
4.81417	42.6874	66.0223	12.0551	83.1882	121.637	5.07221	-2.54289	-1.18871	4.96726	4.26219	6.21597	2.47039	18.7069	30.4169	4.84557	68.7358	100.144
4.81417	42.6874	66.0221	12.0689	83.1793	121.61	5.07221	-2.69203	-0.870828	4.96726	4.47711	6.86072	2.47039	18.5562	30.7302	4.84557	68.9909	100.144
4.82109	43.0689	66.4009	12.0827	83.0505	121.224	5.07604	-2.58642	-0.553995	4.97476	4.32856	7.18042	2.47402	18.7062	30.4148	4.84921	68.9893	100.14
4.82109	42.6845	66.0136	12.0862	83.168	121.576	5.07604	-2.69237	-0.871862	4.97476	3.81834	7.18042	2.47402	18.7062	30.4148	4.85284	68.9877	100.135
4.82109	43.0689	66.4009	12.0965	83.0415	121.196	5.08743	-2.6934	-0.874944	4.97844	4.07302	7.17911	2.48492	19.4231	31.035	4.85648	68.986	100.13
4.83146	43.0646	66.3879	12.1	83.0393	121.19	5.08743	-2.58746	-0.557115	4.97844	4.07302	7.17911	2.48492	19.6782	31.035	4.86012	68.9844	100.125
4.83492	43.0632	66.3837	12.1	83.159	121.549	5.09119	-2.5878	-0.558143	4.99338	4.07124	7.17378	2.48492	19.365	30.0952	4.87467	68.978	100.106
4.84184	42.5496	66.375	12.1069	83.5138	122.613	5.09119	-2.69374	-0.875959	4.99707	4.0708	7.17246	2.48492	19.3187	30.7217	4.87467	68.4678	100.106
4.84184	42.5496	66.3749	12.1277	83.1411	121.495	5.09119	-2.69374	-0.875959	4.99707	4.17823	7.49474	2.48855	19.318	30.7196	4.87831	68.9764	100.101
4.8453	42.4191	65.9836	12.1311	83.1388	121.488	5.10641	-2.58919	-0.562309	5.00082	4.17778	7.49339	2.48492	19.3187	30.7217	4.87831	68.9764	100.101
4.8453	42.9299	65.9837	12.1415	83.132	121.468	5.11016	-2.58953	-0.563336	5.00457	4.17733	7.49204	2.48492	19.3187	30.7217	4.88922	68.9716	100.086
4.84875	42.9284	65.9792	12.1449	83.1298	121.461	5.11016	-2.80136	-1.19884	5.00457	4.17733	7.49204	2.48492	19.3187	30.7217	4.88922	69.2267	100.086
4.85568	42.7964	65.5833	12.1588	83.1207	121.434	5.12156	-1.82525	-0.566456	5.00825	3.96206	6.84623	2.48855	19.4224	31.0328	4.89286	69.2251	100.082
4.85913	42.6658	65.1915	12.1726	83.2315	121.766	5.12156	-2.59057	-0.566456	5.00825	3.85465	6.524	2.48855	19.4224	31.0328	4.8965	69.7336	100.077
4.85913	42.6658	65.1915	12.1795	83.3468	122.112	5.12914	-2.08105	-0.568529	5.02688	3.85247	6.51748	2.49945	19.3159	30.7132	4.90378	69.2202	100.067
4.85913	42.6658	65.1916	12.1864	83.3422	122.099	5.13678	-1.82664	-0.570621	5.02688	3.85247	6.51748	2.49945	19.2115	30.4	4.90741	69.7288	100.062
4.86259	43.1781	65.9621	12.1899	83.34	122.092	5.13678	-2.08175	-0.570621	5.02688	3.85247	6.51748	2.49945	19.2115	30.4	4.91105	69.217	100.058
4.87297	43.3028	66.3362	12.2106	83.3264	122.051	5.14436	-2.33755	-0.572695	5.02688	4.10758	6.51748	2.49945	18.9564	30.4	4.91105	69.217	100.058
4.87988	43.2999	66.3275	12.2141	83.3241	122.044	5.14436	-2.33755	-0.572695	5.02688	4.10758	6.51748	2.49945	18.9564	30.4	4.91105	68.9619	100.058
4.87988	43.2999	66.3277	12.2175	83.2023	121.679	5.14818	-2.3379	-0.573741	5.03438	4.06636	7.15915	2.49945	18.9564	30.4	4.91105	69.0647	100.366
4.88334	42.7878	66.3233	12.2175	83.3219	122.038	5.14436	-2.33755	-0.572695	5.03438	4.06636	7.15915	2.50309	18.7005	30.3979	4.91105	68.9619	100.058
4.8868	42.7863	66.3189	12.2382	83.5636	121.997	5.15193	-2.33824	-0.574768	5.04182	3.95811	6.83438	2.50672	19.5696	30.709	4.91468	69.063	100.361
4.8868	42.7863	66.319	12.2382	83.5637	121.997	5.15575	-2.33859	-0.575814	5.04182	3.19278	6.83438	2.50672	19.5696	30.709	4.9256	69.0582	100.346
4.8868	42.7863	66.319	12.2417	83.3061	121.99	5.16333	-2.19003	-0.895461	5.04182	3.0854	6.51225	2.50672	19.0593	30.709	4.93651	69.3085	100.332
4.8868	42.7863	66.319	12.2521	83.5546	121.97	5.16715	-2.19037	-0.896494	5.04925	3.84986	6.50965	2.50672	19.0593	30.709	4.94015	69.8171	100.327
4.89718	42.7821	66.3062	12.2659	83.5455	121.943	5.17091	-2.19071	-0.897508	5.05669	3.63428	5.8629	2.51399	18.9535	30.3916	4.94015	69.3069	100.327
4.90755	42.7777	66.2931	12.2763	83.7778	122.64	5.17091	-2.65752	-1.53261	5.06044	3.7412	6.18367	2.51399	18.8491	30.0784	4.94379	69.0501	100.322
4.90755	42.7777	66.2932	12.2866	83.8906	122.978	5.17091	-2.65752	-1.53261	5.06419	4.25099	6.18237	2.51762	19.1036	30.0763	4.94379	68.9474	100.014
4.91101	43.0316	66.2888	12.2901	83.8884	122.971	5.17091	-2.59507	-0.579959	5.06419	4.25099	6.18237	2.51762	19.6138	30.0763	4.94743	68.9458	100.009
4.91101	43.0316	66.2889	12.2935	83.8861	122.964	5.1823	-2.59611	-0.583078	5.06788	3.74035	6.1811	2.52852	19.6117	30.07	4.94379	68.4372	100.014
4.91101	43.1606	66.676	12.3108	83.8748	122.93	5.18613	-2.44719	-0.901622	5.06788	3.84769	6.50313	2.52852	19.6117	30.07	4.95107	68.9442	100.004
4.91447	42.9039	66.6717	12.3246	83.6266	122.186	5.18613	-2.59646	-0.584124	5.07163	3.33703	6.50182	2.52852	19.6117	30.07	4.95107	68.8415	99.6963
4.92485	42.8996	66.6588	12.3281	83.2496	121.821	5.18988	-1.93731	-0.902636	5.08282	3.33573	6.49791	2.52489	19.6124	30.0721	4.96198	68.9394	99.9899
4.92485	42.8996	66.6587	12.335	83.2451	121.807	5.18988	-1.93731	-0.902636	5.09025	3.84508	6.4953	2.52489	19.3573	30.0721	4.96198	69.7047	99.9899
4.93522	42.8953	66.6458	12.3385	83.0038	121.083	5.1937	-2.34205	-0.586196	5.094	3.84464	6.49399	2.52489	19.1022	30.0721	4.96562	69.7031	99.9851
4.93868	42.7648	66.2544	12.3592	83.1098	121.401	5.19753	-2.5975	-0.587242	5.094	3.84464	6.49399	2.52489	19.1022	30.0721	4.96925	69.7015	99.9803
4.93868	42.8938	66.6415	12.3661	83.1053	121.388	5.20892	-2.34344	-0.59036	5.094	3.84464	6.49399	2.52126	18.9521	30.3873	4.97653	69.0356	100.279
4.93868	43.0201	66.2543	12.3696	83.3418	122.097	5.22025	-2.34447	-0.593459	5.094	3.84464	6.49399	2.53216	18.95	30.381	4.97653	69.241	100.895
4.93868	42.7648	66.2544	12.3765	83.3374	122.084	5.22025	-2.34447	-0.593459	5.094	4.09975	6.49399	2.53216	18.95	30.381	4.97653	69.241	100.895
4.94214	43.0187	66.2501	12.3903	83.4477	122.415	5.22025	-2.59957	-0.593459	5.10512	4.09846	6.4901	2.52852	18.9507	30.3831	4.99108	69.0292	100.259
4.94214	43.0187	66.2501	12.3938	83.1901	122.408	5.22025	-2.59957	-0.593459	5.10888	4.31262	7.13258	2.52852	18.5912	30.07	4.99108	69.0292	100.259
4.94559	43.0172	66.2458	12.3938	83.0707	122.05	5.2279	-2.60027	-0.59555	5.11263	4.31217	7.13124	2.53579	18.5898	30.0658	4.99472	69.0276	100.254
4.95251	43.0144	66.2372	12.4076	83.181	122.381	5.23547	-2.60096	-0.597622	5.10888	3.43999	6.81069	2.53942	18.5891	30.0637	4.99472	68.7725	100.254
4.95597	43.013	66.233	12.418	83.0548	122.003	5.23547	-2.09075	-0.597622	5.11263	3.54684	7.13124	2.53942	18.5891	30.0637	4.99472	68.9778	100.87
4.96288	42.7547	66.2242	12.418	83.0549	122.003	5.2393	-2.0911	-0.598668	5.11631	3.94933	6.80806	2.54305	18.5884	30.0616	4.99472	68.9778	100.87
4.96288	43.01	66.2242	12.4422	83.039	121.955	5.2393	-1.83599	-0.598668	5.12381	3.33095	6.48356	2.54305	18.6928	30.3747	5.00199	68.8221	101.169
4.96635	42.7533	66.2199	12.4422	83.1583	122.313	5.2393	-1.94176	-0.915987	5.13493	3.83987	6.47967	2.54669	18.9472	30.3725	5.00927	69.0739	101.159
4.96635	42.4979	66.2199	12.4491	83.0345	121.942	5.2393	-1.94176	-0.915987	5.13493	3.83987	6.47967	2.54669	18.9472	30.3725	5.00927	68.5637	101.159
4.97672	42.878	66.5939	12.4698	83.1402	122.259	5.24687	-1.83668	-0.60074	5.13493	3.83987	6.47967	2.55395	18.9458	30.3683	5.00927	68.4611	100.851
4.98018	42.8765	66.5896	12.4733	83.6486	122.252	5.25445	-1.83737	-0.602811	5.13493	3.83987	6.47967	2.55395	18.795	30.6813	5.01654	68.5605	101.149
4.98018	42.8766	66.5897	12.4802	83.6441	122.238	5.25827	-2.09283	-0.603857	5.13493	4.09498	6.47967	2.55395	18.9458	30.3683	5.02019	69.2215	100.836
4.98709	42.8737	66.581	12.4836	83.6419	122.232	5.26585	-2.13714	0.0285334	5.13869	3.83943	6.47836	2.55395	19.456	30.3683	5.02019	69.0163	100.221
4.99055	42.7432	66.1897	12.4836	83.7611	122.589	5.26585	-2.13714	0.0285334	5.15363	4.3073	7.11662	2.55395	18.6907	30.3683	5.02019	69.0163	100.221
4.99747	42.7404	66.1812	12.4975	83.8712	122.92	5.26967	-2.1375	0.0274625	5.15363	4.0928	6.47314	2.55395	19.2009	30.3683	5.02019	68.5559	99.6048
4.99747	42.485	66.1812	12.5113	83.8622	122.893	5.26967	-2.34897	-0.606974	5.15731	4.09237	6.47185	2.55395	18.8879	29.4292	5.02382	68.5543	99.6
4.99747	42.485	66.1811	12.5182	83.7385	122.521	5.26967	-2.64771	0.0274625	5.16106	3.9847	6.14882	2.55758	18.9451	30.3662	5.03474	68.7547	100.201
4.99747	42.9957	66.1812	12.5182	83.8576	122.879	5.27724	-2.64841	0.0253402	5.16106	3.9847	6.14882	2.56122	18.9444	30.3641	5.04201	69.0593	101.115
4.99747	43.38	66.568	12.5424	83.7225	122.473	5.27724	-2.85988	-0.609045	5.17593	4.49319	6.14367	2.56485	18.9437	30.362	5.04201	69.0593	101.115
5.00093	43.3786	66.5637	12.5458	84.1119	122.109	5.281	-2.86022	-0.610072	5.17968	3.98255	6.14237	2.56485	18.8393	30.049	5.04564	69.0577	101.11
5.00093	43.3786	66.5637	12.5528	83.5965	122.095	5.28864	-2.7552	-0.295007	5.18344	3.98211	6.14107	2.56848	19.1981	30.3598	5.04201	68.3439	100.499
5.01131	43.3743	66.5508	12.5597	84.222	122.44	5.2924	-2.86126	-0.613188	5.18344	4.08933	6.46271	2.57211	19.093	30.0448	5.04564	69.005	100.187
5.02514	43.1132	66.5336	12.5735	84.0937	122.055	5.29622	-2.8616	-0.614233	5.18344	4.19654	6.78435	2.57938	19.0916	30.0406	5.0602	68.9985	100.167
5.02514	43.1131	66.5334	12.577	84.2106	122.406	5.29622	-3.011	-0.297104	5.18344	4.19654	6.78435	2.57575	18.8837	29.4168	5.06384	68.9969	100.163
5.0286	43.3694	67.3023	12.5804	83.6976	122.399	5.29622	-3.011	-0.297104	5.18344	3.94143	6.78435	2.57575	19.3475	30.0427	5.06384	69.0995	100.47
5.0286	43.6248	67.3022	12.5908	84.3206	122.735	5.29622	-2.8616	-0.614233	5.18344	3.94143	6.78435	2.57575	19.0923	30.0427	5.07111	68.9937	100.153
5.0286	43.3694	67.3023	12.5942	83.8074	122.728	5.29622	-2.50078	-0.297104	5.19456	3.68501	6.78043	2.57938	19.0916	30.0406	5.07475	68.9921	100.148
5.03205	43.1103	66.5249	12.6081	83.7984	122.701	5.30379	-2.71289	-0.933408	5.19831	3.72529	6.13592	2.57938	18.8365	30.0406	5.07839	68.9905	100.143
5.03205	43.1102	66.5248	12.6184	83.6726	122.324	5.30762	-2.71323	-0.934441	5.20206	3.83205	6.4562	2.58301	18.9401	30.3514	5.08203	68.9888	100.138
5.03897	43.1073	66.5161	12.6253	83.668	122.31	5.31137	-2.45847	-0.935454	5.20206	3.72485	6.13462	2.58665	18.8351	30.0364	5.08203	68.9888	100.138
5.04935	43.103	66.5032	12.6357	83.6612	122.29	5.31902	-2.35347	-0.620466	5.20574	3.83162	6.45491	2.58665	18.9394	30.3493	5.07839	68.9905	100.143
5.05626	42.8425	65.7217	12.6461	83.2973	121.198	5.31902	-2.45916	-0.937519	5.2095	3.61681	5.81049	2.58665	18.9394	30.3493	5.08203	68.9888	100.138
5.05626	43.1002	66.4946	12.6495	83.7711	122.619	5.32277	-2.67085	-1.57261	5.21325	3.61638	5.8092	2.58665	19.4032	30.9751	5.08203	68.9888	100.138
5.05626	43.1001	66.4945	12.6564	83.8856	122.963	5.33417	-2.35485	-0.624608	5.21325	3.61638	5.8092	2.58665	19.1945	30.3493	5.08566	68.9872	100.133
5.05626	43.229	66.8812	12.6564	83.7666	122.606	5.33041	-2.67153	-1.57463	5.22437	3.72228	6.12689	2.59391	18.938	30.345	5.09658	68.9824	100.119
5.05626	43.229	66.8811	12.6668	83.7598	122.585	5.33041	-2.67153	-1.57463	5.22437	3.72228	6.12689	2.59755	18.4271	30.3429	5.09658	68.9824	100.119
5.05626	43.229	66.8812	12.6841	84.1227	122.908	5.34557	-2.50534	-0.310759	5.22812	3.72184	6.12559	2.59755	18.9373	30.3429	5.10385	68.7241	100.109
5.0701	42.9679	66.8638	12.6945	83.997	122.531	5.34557	-2.50534	-0.310759	5.22812	3.72184	6.12559	2.59755	18.9373	30.3429	5.10749	68.9776	100.104
5.07701	43.0938	67.2415	12.7014	83.7545	121.803	5.35696	-2.50639	-0.313913	5.23555	3.72099	6.12302	2.59755	18.9373	30.3429	5.11113	68.7709	99.4844
5.07701	43.2204	66.8552	12.7083	83.9878	122.503	5.35696	-2.50639	-0.313913	5.23555	3.72099	6.12302	2.59755	18.9373	30.3429	5.11476	68.7693	99.4796
5.07701	43.2204	66.8553	12.7221	84.3355	123.546	5.35696	-2.50639	-0.313913	5.23931	3.72055	6.12172	2.59755	19.1924	30.3429	5.12204	68.9711	100.085
5.07701	43.4758	66.8552	12.729	83.8554	122.106	5.35696	-2.71767	-0.947764	5.24674	3.7197	6.11915	2.59755	19.0881	30.0301	5.12568	69.072	100.388
5.08393	43.4728	66.8464	12.7359	83.8508	122.092	5.35696	-2.46257	-0.947764	5.24674	3.7197	6.11915	2.59755	18.9838	29.7172	5.12204	68.3083	100.393
5.09085	43.9808	66.8378	12.7498	83.7051	122.421	5.36079	-2.71802	-0.948796	5.25418	3.97395	6.11657	2.60845	19.086	30.0237	5.12568	68.3067	100.388
5.09085	43.9808	66.8378	12.7532	83.7029	122.415	5.36079	-2.71802	-0.948796	5.25418	3.71884	6.11657	2.60845	19.086	30.0237	5.12568	68.3067	100.388
5.09085	43.2146	66.8378	12.7636	83.6961	122.394	5.36836	-2.7187	-0.950842	5.25793	3.82553	6.43666	2.60845	19.086	30.0237	5.13659	68.8121	100.373
5.09777	42.9563	66.829	12.767	83.6938	122.387	5.37212	-2.82466	-1.26873	5.26168	3.71797	6.11397	2.61208	19.1896	30.3345	5.14387	68.8088	100.364
5.10814	43.0808	67.2023	12.7774	84.1978	122.367	5.38351	-2.82567	-1.27177	5.27287	3.71668	6.1101	2.61208	19.1431	30.9601	5.14387	68.8088	100.364
5.1116	43.0793	67.1979	12.7809	84.3144	122.717	5.38351	-2.82567	-1.27177	5.26537	3.71755	6.1127	2.61571	18.9338	30.3324	5.15115	68.8056	100.354
5.1116	42.8239	67.198	12.7981	84.303	122.683	5.38734	-2.82601	-1.27279	5.27655	3.71626	6.10883	2.62661	19.1868	30.326	5.15115	68.9081	100.661
5.1116	42.8239	67.1978	12.8016	84.0453	122.676	5.39116	-2.57125	-1.27381	5.28399	3.7154	6.10625	2.62661	19.1868	30.326	5.15842	68.9048	100.652
5.11506	42.9492	66.8076	12.8085	84.0407	122.662	5.39116	-2.82635	-1.27381	5.29149	3.71453	6.10365	2.61571	19.1889	30.3324	5.16205	68.9032	100.647
5.11851	42.9477	66.8031	12.812	84.0385	122.655	5.39491	-2.57159	-1.27481	5.29149	3.71453	6.10365	2.61935	19.1882	30.3302	5.16205	68.9032	100.647
5.12543	43.3288	67.1805	12.8189	84.034	122.642	5.40249	-1.95645	-0.960053	5.29518	3.71411	6.10238	2.61935	19.1882	30.3302	5.1657	69.4118	100.642
5.12543	43.3288	67.1805	12.8362	84.0225	122.607	5.41013	-1.95714	-0.962116	5.29518	3.60702	5.78111	2.61935	18.9331	30.3302	5.16933	69.4102	100.637
5.12889	43.3274	67.1762	12.8465	84.0157	122.587	5.41389	-2.72279	-0.963129	5.29893	3.60659	5.77983	2.63388	18.9303	30.3218	5.17297	69.3061	100.325
5.12889	43.8382	67.1762	12.8638	84.0042	122.552	5.41389	-2.72279	-0.963129	5.29518	3.60702	5.78111	2.63388	18.9303	30.3218	5.1766	69.3045	100.32
5.13927	43.9625	67.5493	12.8638	84.0043	122.553	5.41771	-2.72314	-0.964161	5.30268	2.94791	6.09978	2.63388	19.1388	30.9473	5.18025	69.4053	100.622
5.14272	43.9611	67.545	12.8742	83.9975	122.532	5.41771	-2.72314	-0.964161	5.30268	2.84083	5.77854	2.63751	18.7321	31.2579	5.18025	68.8951	100.622
5.14272	43.8323	67.1587	12.8811	84.3671	122.875	5.41771	-2.72314	-0.964161	5.30268	3.35105	5.77854	2.63388	18.7328	31.2601	5.18388	68.8935	100.618
5.14272	43.8324	67.1588	12.8845	84.3647	122.868	5.42153	-2.72348	-0.965192	5.31012	3.45727	6.09721	2.63751	18.6279	30.9452	5.18388	68.3833	100.618
5.14618	43.5755	67.1544	12.8949	84.6133	122.847	5.42153	-2.97859	-0.965192	5.3213	3.34892	5.77216	2.63388	18.5243	30.6346	5.18388	68.3833	100.618
5.14964	43.5741	67.1501	12.9018	84.6087	122.833	5.43668	-2.97995	-0.969281	5.32499	3.3485	5.7709	2.63751	19.0338	30.6324	5.18752	68.8919	100.613
5.14964	44.0848	67.15	12.9122	84.6019	122.813	5.44051	-2.9803	-0.970312	5.3213	3.34892	5.77216	2.63751	19.0338	30.6324	5.18752	68.7894	100.305
5.15656	44.082	67.1414	12.9226	84.3577	122.08	5.43668	-2.97995	-0.969281	5.32499	3.3895	5.12857	2.64477	19.0324	30.6282	5.1948	69.1437	100.603
5.15656	43.5711	67.1412	12.926	84.5927	122.785	5.44051	-2.72519	-0.970312	5.32874	3.13397	5.12731	2.64477	19.0324	30.6282	5.20571	69.1389	100.588
5.15656	44.2107	67.5276	12.9398	84.5836	122.758	5.44426	-2.72553	-0.971325	5.32874	3.34807	5.76961	2.64477	19.0324	30.6282	5.20935	68.8821	100.584
5.16001	43.5697	67.137	12.9468	84.5791	122.745	5.44426	-2.72553	-0.971325	5.33618	3.34722	5.76706	2.64477	19.0324	30.6282	5.20935	68.8821	100.584
5.17385	43.1819	67.5057	12.9537	84.3191	122.731	5.45566	-2.83208	-1.291	5.33618	3.13314	5.12481	2.65204	19.2861	30.6239	5.21299	68.4727	100.886
5.18077	43.0503	67.1109	12.9641	84.3123	122.71	5.45948	-2.83242	-1.29201	5.33993	3.45383	6.08689	2.65204	19.2861	30.6239	5.21299	68.5752	101.193
5.18423	43.1776	67.4927	12.971	84.2895	123.408	5.46323	-2.32254	-1.29301	5.34736	3.34595	5.76323	2.65204	19.031	30.6239	5.21299	68.4727	100.886
5.18423	43.0489	67.1066	12.9779	84.2849	123.394	5.46706	-2.32288	-1.29403	5.35855	3.59978	5.7594	2.65204	19.031	30.6239	5.22026	68.4695	100.876
5.18423	43.4329	67.4927	12.9813	84.0455	122.676	5.46706	-2.32288	-1.29403	5.3623	3.70636	6.07915	2.66294	19.284	30.6175	5.22026	68.9797	100.876
5.18423	43.4328	67.4926	12.9951	84.1548	123.004	5.47088	-3.34365	-1.29505	5.3623	3.70636	6.07915	2.66657	19.179	30.3028	5.22026	68.9797	100.876
5.18423	43.4329	67.4927	13.0055	84.1479	122.984	5.47088	-3.34365	-1.29505	5.3623	3.66528	6.72122	2.66657	19.179	30.3028	5.2239	68.4679	100.871
5.1946	43.6839	67.4796	13.0124	83.7695	122.615	5.47088	-3.23814	-0.978507	5.3623	3.92039	6.72122	2.66657	19.179	30.3028	5.23117	68.7197	100.862
5.1946	43.6839	67.4795	13.0194	83.8834	122.956	5.47463	-3.23848	-0.97952	5.3623	3.45125	6.07915	2.66657	19.179	30.3028	5.24209	68.7149	100.847
5.19806	44.0646	67.0892	13.0401	83.6144	122.915	5.48603	-3.2395	-0.982595	5.36599	3.66484	6.71992	2.66657	18.9239	30.3028	5.24209	68.7149	100.847
5.20498	43.9331	66.6947	13.047	83.6098	122.901	5.48985	-2.72963	-0.983626	5.37717	3.44954	6.074	2.66294	18.9246	30.3049	5.24209	68.97	100.847
5.20844	44.0602	67.0761	13.0504	83.6075	122.894	5.48985	-2.72963	-0.983626	5.37717	3.34254	5.75301	2.66294	18.9246	30.3049	5.24936	68.9667	100.837
5.21189	43.8033	67.0717	13.0539	84.1159	122.888	5.49361	-2.72996	-0.984638	5.37717	3.44954	6.074	2.66294	18.9246	30.3049	5.25664	68.9635	100.827
5.21535	43.8019	67.0674	13.0677	84.3621	122.86	5.50125	-2.73065	-0.986701	5.38461	3.34169	5.75047	2.66657	18.9706	29.6774	5.25664	69.1682	101.442
5.21881	43.5451	67.0632	13.0747	84.3575	122.846	5.50125	-2.73065	-0.986701	5.38836	3.34126	5.74918	2.67384	18.9692	29.6733	5.26028	69.0642	101.13
5.21881	43.9291	67.4491	13.0781	84.3553	122.839	5.50883	-2.73133	-0.988744	5.38836	3.08615	5.74918	2.68111	19.1762	30.2943	5.26028	69.0642	101.13
5.21881	43.6737	67.4491	13.0816	84.0976	122.833	5.50883	-2.73133	-0.988744	5.39211	3.08573	5.7479	2.67384	18.9225	30.2985	5.26391	69.0626	101.125
5.22227	43.6723	67.4447	13.0954	84.0884	122.805	5.50883	-2.98644	-0.988744	5.39211	2.57551	5.7479	2.6702	18.9232	30.3007	5.26391	68.8075	101.125
5.23264	42.9018	67.4316	13.1023	84.0839	122.792	5.52405	-2.98781	-0.99285	5.39211	2.57551	5.7479	2.68111	19.0253	30.6069	5.26391	68.7051	100.818
5.23264	43.6679	67.4317	13.123	84.3255	122.75	5.5278	-2.73304	-0.993862	5.40323	2.57424	5.74409	2.68111	19.0253	30.6069	5.27119	68.7019	100.808
5.23264	43.4125	67.4316	13.123	84.4439	123.105	5.53162	-2.73338	-0.994893	5.40699	2.93588	6.06369	2.67747	19.026	30.609	5.28211	68.697	100.793
5.23611	43.6665	67.4273	13.123	84.444	123.106	5.53162	-2.52249	-0.362211	5.41817	2.93459	6.05982	2.68111	19.2804	30.6069	5.28211	68.697	100.793
5.23611	43.6664	67.4272	13.1403	84.4326	123.071	5.53162	-2.73338	-0.994893	5.42193	3.08232	5.73768	2.68474	19.2797	30.6048	5.28574	68.2875	101.096
5.24648	43.6621	67.4142	13.1576	84.4211	123.037	5.53538	-3.05005	-1.94489	5.42193	3.44438	6.05852	2.68111	19.1762	30.2943	5.28574	68.2875	101.096
5.24994	43.4053	67.4099	13.1576	84.4211	123.037	5.5392	-3.15582	-2.2622	5.42561	3.18884	6.05724	2.68111	19.1762	30.2943	5.29301	68.2842	101.086
5.2534	43.6591	67.4053	13.1645	84.1611	123.023	5.5392	-3.15582	-2.2622	5.43304	3.33616	5.73387	2.68837	19.1748	30.2901	5.29301	68.2842	101.086
5.25685	43.6577	67.4011	13.1714	84.1565	123.009	5.54302	-3.15614	-2.26318	5.44055	3.44223	6.05208	2.69201	19.1741	30.288	5.29666	68.5377	101.081
5.26031	43.6563	67.3968	13.1853	84.4027	122.982	5.5506	-3.09562	-1.31629	5.44423	3.18669	6.0508	2.68837	19.1748	30.2901	5.29666	69.0479	101.081
5.26031	43.6563	67.3967	13.1887	84.145	122.975	5.5506	-3.35073	-1.31629	5.44423	3.18669	6.0508	2.69201	18.8615	29.3502	5.29666	69.0479	101.081
5.26031	43.9133	68.1679	13.1991	84.1382	122.954	5.55442	-3.60618	-1.3173	5.44423	3.07977	5.73004	2.69564	18.8608	29.3481	5.30029	69.0463	101.076
5.27069	43.909	68.1548	13.2163	84.3821	122.92	5.55442	-3.50076	-1.00104	5.44423	3.18669	6.0508	2.69927	18.8601	29.3461	5.32212	69.0365	101.047
5.27069	43.909	68.1548	13.2163	84.382	122.92	5.55817	-3.3514	-1.3183	5.44423	2.56956	5.73004	2.7029	18.8595	29.344	5.32212	69.0365	101.047
5.27761	43.5222	67.7606	13.2232	84.3775	122.906	5.56957	-2.9919	-1.00513	5.44798	3.07935	5.72876	2.7029	18.8595	29.344	5.32212	69.0365	101.047
5.28452	43.5193	67.7519	13.2232	84.6329	122.906	5.56957	-2.9919	-1.00513	5.44798	3.07935	5.72876	2.7029	19.172	30.2816	5.32576	69.0349	101.042
5.28452	43.5193	67.7519	13.2509	84.6145	122.851	5.58097	-2.73782	-1.0082	5.46661	3.18411	6.04306	2.70654	19.1713	30.2795	5.3294	69.0333	101.037
5.29144	43.6432	67.3575	13.2509	84.3591	122.851	5.57339	-2.84254	-1.32236	5.46661	3.18411	6.04306	2.70654	19.1713	30.2795	5.33303	68.7765	101.032
5.28798	43.7732	67.7475	13.2613	84.3523	122.83	5.58097	-2.73782	-1.0082	5.47034	3.18368	6.04177	2.7138	18.9148	30.2753	5.33667	68.8772	101.334
5.28798	44.1554	67.3618	13.2613	84.3523	122.831	5.58097	-2.84321	-1.32437	5.47406	3.18325	6.04048	2.7138	18.9148	30.2753	5.33667	69.1323	101.334
5.2949	44.1525	67.3531	13.2751	84.3432	122.803	5.59612	-2.84455	-1.32841	5.47034	3.18368	6.04177	2.71743	18.659	30.2732	5.34031	69.1307	101.329
5.2949	44.1525	67.353	13.2854	84.4545	123.137	5.59612	-2.73918	-1.01228	5.47406	3.07637	5.71983	2.71743	18.5548	29.9607	5.34031	69.1307	101.329
5.29835	43.8957	67.3488	13.2924	84.4499	123.123	5.59994	-2.73952	-1.01331	5.48151	3.33063	5.71727	2.72107	18.5541	29.9586	5.34031	69.1307	101.329
5.30527	43.8928	67.34	13.3062	84.3225	122.741	5.61517	-2.48579	-1.01742	5.49269	3.07424	5.71345	2.72107	18.4499	29.6461	5.35486	69.1241	101.31
5.31564	43.633	67.327	13.3097	84.8311	122.734	5.61517	-2.48579	-1.01742	5.49642	3.07382	5.71217	2.72107	19.1111	29.3336	5.35486	69.3287	101.923
5.31911	43.5031	66.9371	13.3166	84.9446	123.075	5.61517	-2.48579	-1.01742	5.49642	3.58404	5.71217	2.7247	19.2146	29.644	5.35486	69.3287	101.923
5.31911	43.5047	67.7082	13.3235	84.94	123.061	5.61517	-2.59114	-1.33348	5.50015	3.58361	5.71089	2.7247	19.2146	29.644	5.36213	68.8152	101.913
5.32257	43.5032	67.7037	13.3304	84.9355	123.048	5.62274	-2.84692	-1.3355	5.50387	3.47633	5.38906	2.7247	18.8085	29.9565	5.36213	68.8152	101.913
5.32602	43.5018	67.6995	13.3338	84.6778	123.041	5.62274	-2.74157	-1.01946	5.5076	3.47591	5.3878	2.7247	18.8085	29.9565	5.36213	68.8152	101.913
5.32602	43.2448	66.9284	13.3373	84.4201	123.034	5.62274	-2.74157	-1.01946	5.5076	3.58276	5.70834	2.72107	18.9134	30.2711	5.36577	68.8136	101.908
5.33294	43.4988	67.6906	13.3684	84.2813	122.617	5.62274	-2.74157	-1.01946	5.5076	3.07254	5.70834	2.72107	18.9134	30.2711	5.38032	68.9599	101.582
5.33986	43.1121	67.2963	13.3719	84.2789	122.61	5.62649	-2.74191	-1.02047	5.51133	3.07211	5.70706	2.72833	18.912	30.2668	5.38032	68.9599	101.582
5.33986	43.3674	67.2964	13.3719	84.279	122.611	5.63414	-2.74259	-1.02253	5.51133	3.07211	5.70706	2.74286	18.9091	30.2584	5.38032	68.9599	101.582
5.34331	43.1107	67.2921	13.3891	84.0121	122.576	5.64172	-2.8486	-1.34055	5.51506	3.07169	5.70579	2.74286	18.805	29.946	5.38032	68.9599	101.582
5.34331	43.1107	67.2921	13.396	84.0076	122.563	5.64172	-2.8486	-1.34055	5.51878	2.30594	5.70451	2.74286	18.805	29.946	5.38032	69.215	101.582
5.35369	43.1063	67.279	13.3995	84.3788	122.91	5.64554	-3.10405	-1.34156	5.5225	2.30552	5.70324	2.74286	18.805	29.946	5.38396	68.9582	101.577
5.35369	44.0009	67.6643	13.4065	84.2173	123.958	5.64554	-2.84894	-1.34156	5.52624	2.30509	5.70196	2.74286	18.805	29.946	5.3876	69.2117	101.572
5.35369	43.8739	68.0496	13.4134	84.7235	123.944	5.64554	-2.59384	-1.34156	5.52624	2.30509	5.70196	2.74286	18.805	29.946	5.39487	69.1062	101.256
5.35369	43.8739	68.0495	13.4168	84.9767	123.937	5.65311	-2.59451	-1.34358	5.53369	2.41106	6.01986	2.74286	19.0601	29.946	5.40942	69.2019	101.543
5.36061	43.9994	68.4261	13.4237	84.8347	124.278	5.65687	-3.10505	-1.34458	5.53369	2.41106	6.01986	2.75376	19.058	29.9397	5.40942	69.0997	101.236
5.36061	43.9994	68.426	13.4479	84.9558	123.875	5.66069	-3.10539	-1.3456	5.54114	2.5585	5.69686	2.75376	18.8497	29.3149	5.40942	69.0997	101.236
5.36752	43.9965	68.4173	13.4513	84.8356	123.514	5.66069	-3.00009	-1.02969	5.54114	2.81361	5.69686	2.75376	19.058	29.9397	5.41307	69.2002	101.538
5.37098	43.6098	67.2573	13.4582	84.831	123.5	5.66451	-3.00043	-1.03072	5.54114	2.81361	5.69686	2.75376	18.8029	29.9397	5.4167	69.1986	101.533
5.37444	43.8651	68.0231	13.4652	85.0817	123.486	5.66451	-3.10573	-1.34661	5.55232	2.81233	5.69303	2.75376	18.5946	29.3149	5.42034	69.197	101.528
5.38481	43.7324	67.625	13.4721	84.8413	122.765	5.66827	-3.10606	-1.34761	5.55605	3.06701	5.69175	2.75376	18.8497	29.3149	5.42034	69.197	101.528
5.38481	43.7324	67.625	13.4825	84.3236	122.744	5.67591	-3.10674	-1.34965	5.55977	2.81148	5.69048	2.76103	18.8484	29.3107	5.42397	69.1953	101.523
5.38481	43.7324	67.6251	13.4894	84.319	122.731	5.67966	-3.21236	-1.66649	5.55977	2.55637	5.69048	2.76103	18.8484	29.3107	5.42397	69.1953	101.523
5.38827	43.4755	67.6207	13.4997	84.3122	122.71	5.68349	-3.4678	-1.6675	5.55977	2.81148	5.69048	2.76103	18.8484	29.3107	5.43125	69.3964	102.126
5.39174	43.7294	67.6162	13.5032	84.4278	123.057	5.68724	-3.46813	-1.66848	5.56722	2.55552	5.68793	2.76466	18.8477	29.3087	5.43853	69.3931	102.117
5.39865	43.7265	67.6075	13.5066	84.2879	123.403	5.69106	-3.3632	-1.35368	5.57095	2.5551	5.68665	2.7683	18.847	29.3066	5.44217	69.3915	102.112
5.39865	43.7265	67.6075	13.524	84.3942	123.723	5.69106	-3.3632	-1.35368	5.57095	2.8102	5.68665	2.7683	18.847	29.3066	5.44217	69.3915	102.112
5.39865	43.8548	67.9924	13.5309	84.3896	123.709	5.70246	-3.36421	-1.35671	5.58958	2.80808	5.68027	2.7683	19.3103	29.9312	5.44217	69.3915	102.112
5.39865	43.8549	67.9925	13.5447	84.3804	123.681	5.70246	-3.1091	-1.35671	5.58958	2.80808	5.68027	2.77556	19.3089	29.927	5.44944	69.3882	102.102
5.40211	43.8534	67.9881	13.555	84.3735	123.66	5.71004	-2.85466	-1.35873	5.59331	2.80765	5.679	2.77556	19.262	30.5517	5.45308	69.5395	101.79
5.40211	43.8534	67.988	13.5585	84.8819	123.653	5.71761	-2.60023	-1.36074	5.59331	2.80765	5.679	2.7792	19.0531	29.9249	5.45308	69.2844	101.79
5.40903	44.1072	68.7496	13.5654	84.8774	123.64	5.72143	-2.85567	-1.36176	5.60076	3.06191	5.67645	2.7792	19.0531	29.9249	5.45308	68.9271	101.484
5.40903	43.8505	67.9794	13.5723	84.8727	123.625	5.72143	-2.85567	-1.36176	5.60076	3.06191	5.67645	2.7792	18.798	29.9249	5.45672	68.5175	101.785
5.4194	44.3582	68.7364	13.5757	84.8705	123.619	5.72143	-2.75043	-1.04605	5.60821	3.31617	5.6739	2.7792	18.798	29.9249	5.45672	68.9255	101.479
5.4194	44.1028	68.7364	13.5896	85.2145	124.651	5.72143	-2.75043	-1.04605	5.61194	3.57085	5.67262	2.7792	18.798	29.9249	5.45672	68.4153	101.479
5.42286	44.2284	68.3469	13.5965	85.2098	124.637	5.72901	-2.901	-0.732416	5.61567	3.57043	5.67134	2.77556	18.5436	29.927	5.46399	68.412	101.469
5.42632	44.4823	68.3424	13.6069	84.9675	123.91	5.73283	-3.11179	-1.36479	5.61567	3.57043	5.67134	2.77556	18.5436	29.927	5.47854	69.2729	101.756
5.42632	44.2269	68.3424	13.6138	84.9628	123.896	5.73666	-2.7518	-1.05016	5.62312	3.56958	5.6688	2.78283	18.9483	29.6105	5.48219	69.6793	101.445
5.43324	44.351	67.9486	13.6241	84.9558	123.875	5.73666	-2.85702	-1.36581	5.62312	3.46286	5.34864	2.78646	18.9476	29.6085	5.48219	69.4751	100.832
5.43324	44.351	67.9486	13.631	84.8336	123.508	5.74041	-2.85735	-1.36681	5.62684	3.05893	5.66752	2.79009	18.7959	29.9186	5.48946	69.4718	100.822
5.44707	44.3452	67.931	13.6345	84.7135	123.148	5.75563	-2.9639	-1.68645	5.63058	3.27193	6.3065	2.79009	18.7959	29.9186	5.48946	69.4718	100.822
5.44707	44.3451	67.9309	13.6553	84.8173	123.459	5.75563	-2.9639	-1.68645	5.62684	2.50704	6.3078	2.79009	18.5408	29.9186	5.48946	69.4718	100.822
5.45053	44.6004	68.6967	13.6587	84.815	123.452	5.75938	-2.96423	-1.68743	5.63058	2.29318	5.66624	2.79736	18.5394	29.9144	5.48946	68.9616	100.822
5.45053	44.345	68.6966	13.6691	84.5527	123.432	5.75563	-2.9639	-1.68645	5.6343	2.50617	6.3052	2.79736	18.7945	29.9144	5.50037	68.9568	100.807
5.45053	44.0896	68.6967	13.676	84.5481	123.418	5.75563	-2.9639	-1.68645	5.64548	2.54659	5.66114	2.80826	18.5373	29.9081	5.50401	68.9551	100.802
5.46436	44.0837	68.679	13.6829	84.5435	123.404	5.75938	-2.96423	-1.68743	5.64921	2.80128	5.65987	2.80826	18.5373	29.9081	5.50765	69.2598	101.717
5.46782	44.081	67.9047	13.6933	84.5365	123.383	5.77078	-2.96523	-1.69043	5.65293	2.80085	5.65859	2.80826	18.5373	29.9081	5.50765	69.2598	101.717
5.47127	43.9513	67.5157	13.7037	84.5295	123.362	5.7746	-2.86038	-1.3759	5.65293	2.80085	5.65859	2.80826	18.5373	29.9081	5.50765	69.2598	101.717
5.47474	43.9498	67.5112	13.7175	84.5204	123.335	5.77836	-3.17623	-2.32345	5.65293	2.80085	5.65859	2.80826	18.5373	29.9081	5.51856	69.1019	102.008
5.47474	43.8216	67.1264	13.7244	84.7509	124.026	5.78218	-3.17656	-2.32442	5.65293	2.80085	5.65859	2.80826	18.6414	30.2203	5.5222	69.3553	102.003
5.4782	44.0755	67.1221	13.7244	84.4955	124.026	5.786	-2.3064	-2.00991	5.66039	2.8	5.65604	2.80826	19.4067	30.2203	5.52584	69.4558	102.304
5.48165	43.9469	67.5025	13.7313	84.4909	124.012	5.786	-3.07172	-2.00991	5.67156	2.79873	5.65222	2.81189	19.406	30.2182	5.52584	69.4558	102.304
5.48511	43.8172	67.1133	13.7382	84.3687	123.646	5.786	-3.07172	-2.00991	5.67156	3.26716	6.29219	2.81189	19.1509	30.2182	5.52948	69.199	102.299
5.49549	43.8129	67.1003	13.7555	84.6125	123.611	5.79358	-3.07238	-2.01188	5.67902	3.26629	6.28959	2.81189	18.7917	29.906	5.52948	69.25	101.687
5.49549	43.8129	67.1003	13.7555	84.3775	122.906	5.7974	-3.07271	-2.01287	5.68274	3.26586	6.28829	2.81189	18.7917	29.906	5.52948	69.0969	101.993
5.49894	43.9397	67.4808	13.7728	84.3659	122.871	5.80115	-3.22299	-1.6984	5.68274	2.83926	5.00849	2.81552	18.9991	30.5283	5.53311	68.9932	101.682
5.5024	44.1936	67.4764	13.7728	85.2495	123.224	5.80498	-2.9079	-0.753129	5.68274	3.05256	5.64839	2.81915	18.7903	29.9018	5.53675	69.0937	101.983
5.5024	44.3218	67.8608	13.7797	85.2449	123.21	5.80873	-2.65313	-0.754153	5.68647	3.56235	5.64712	2.82279	18.2794	29.8997	5.54039	68.9899	101.672
5.50586	44.3203	67.8565	13.7831	85.2426	123.203	5.81255	-2.90859	-0.755195	5.69392	3.5615	5.64457	2.82279	18.2794	29.8997	5.54403	68.9883	101.667
5.50932	43.9353	67.4677	13.8073	84.6953	123.859	5.81637	-2.90894	-0.756237	5.69392	3.05128	5.64457	2.82279	19.1957	29.5876	5.5513	69.2401	101.657
5.5197	44.3155	68.6083	13.8108	84.6929	123.852	5.82013	-3.16439	-0.75726	5.70137	3.56065	5.64202	2.82642	19.091	29.2733	5.55494	69.2385	101.653
5.5197	44.1873	68.2235	13.8281	84.6813	123.818	5.82395	-3.37498	-1.38903	5.70137	3.05043	5.64202	2.83005	18.6841	29.5834	5.55858	69.2368	101.648
5.5197	43.9309	67.4545	13.8281	85.1921	123.818	5.82395	-3.37498	-1.38903	5.7051	3.05001	5.64074	2.83369	18.6834	29.5813	5.56585	69.4377	102.25
5.5197	44.0591	67.8389	13.835	85.1876	123.804	5.82395	-3.4801	-1.70439	5.71628	3.04873	5.63692	2.83369	18.7875	29.8934	5.56585	69.4377	102.25
5.5197	44.1873	68.2236	13.835	85.4224	124.509	5.82777	-2.97021	-1.70539	5.71628	3.04873	5.63692	2.83369	18.7875	29.8934	5.56585	69.4377	102.25
5.5197	44.0591	67.8389	13.8523	85.4109	124.474	5.83153	-2.86543	-1.39104	5.72001	3.04831	5.63564	2.83732	18.7868	29.8913	5.57676	69.0756	101.929
5.5197	43.9309	67.4545	13.8557	85.4085	124.467	5.83535	-2.86577	-1.39206	5.72373	3.5581	5.63437	2.84096	18.8901	30.2013	5.57676	69.0756	101.929
5.53007	44.0547	67.8257	13.8696	85.537	124.086	5.84292	-2.86644	-1.39407	5.72373	2.94128	5.31456	2.84459	19.2956	29.8871	5.5804	68.5637	101.924
5.53353	43.9251	67.437	13.873	85.5348	124.08	5.84292	-2.86644	-1.39407	5.72373	2.94128	5.31456	2.84459	18.8894	30.1992	5.5804	68.5637	101.924
5.53699	43.9237	67.4327	13.8765	85.5324	124.072	5.84675	-2.61168	-1.39509	5.72373	3.4515	5.31456	2.84822	18.4825	30.5092	5.5804	68.5637	101.924
5.54045	44.3067	68.5818	13.8903	85.2678	124.045	5.8619	-2.61302	-1.39911	5.72373	2.94128	5.31456	2.84822	18.4825	30.5092	5.59132	68.6608	102.215
5.5439	44.3052	68.5774	13.8972	85.1459	123.679	5.8619	-2.86812	-1.39911	5.73864	2.9396	5.30951	2.84822	19.3989	30.1971	5.59132	68.6608	102.215
5.55082	44.5577	68.5686	13.9179	85.0147	123.285	5.86572	-2.65831	-0.769686	5.73864	2.9396	5.30951	2.84822	18.6336	30.1971	5.59495	68.6592	102.211
5.55428	44.5562	68.5642	13.9249	84.6164	123.623	5.86572	-2.86846	-1.40013	5.74236	2.93918	5.30825	2.85549	19.2935	29.8808	5.59495	68.6592	102.211
5.55428	44.5563	68.5643	13.9249	84.6164	123.623	5.86947	-2.97386	-1.71634	5.74236	2.93918	5.30825	2.85549	19.2935	29.8808	5.59495	68.6592	102.211
5.5612	44.5533	68.5553	13.9421	84.9985	123.237	5.8733	-2.9742	-1.71734	5.75354	3.29959	5.62417	2.85549	19.2935	29.8808	5.60223	68.4008	102.201
5.5612	43.9143	68.1709	13.949	84.9939	123.223	5.88087	-2.92987	-2.34967	5.75727	3.29917	5.6229	2.85549	19.0384	29.8808	5.60223	68.5539	101.895
5.56811	43.9114	68.162	13.9525	85.1087	123.567	5.88087	-2.92987	-2.34967	5.75727	3.29917	5.6229	2.85912	19.0377	29.8787	5.61678	69.0575	101.875
5.56811	44.1668	68.162	13.9594	85.1041	123.553	5.8847	-2.67509	-2.35065	5.76099	3.29874	5.62162	2.85549	18.7833	29.8808	5.61678	69.0575	101.875
5.56811	44.1668	68.162	13.9629	85.1018	123.547	5.89227	-2.67574	-2.35259	5.76099	3.29874	5.62162	2.85186	18.2738	29.8829	5.62405	69.3093	101.865
5.57157	44.2935	68.5421	13.9836	84.8324	123.505	5.89227	-2.93085	-2.35259	5.76472	3.19176	5.30068	2.85549	18.2731	29.8808	5.62405	69.3093	101.865
5.57503	44.5482	69.3064	13.9871	84.8093	124.201	5.89227	-2.8258	-2.03745	5.76472	3.04321	5.62035	2.85549	18.2731	29.8808	5.62042	69.311	101.87
5.57849	44.2905	68.5333	13.994	84.8046	124.187	5.89609	-2.82613	-2.03844	5.76845	2.78768	5.61907	2.85549	18.7833	29.8808	5.62042	69.107	101.258
5.57849	45.0576	69.302	14.0078	84.7953	124.16	5.89609	-2.72109	-1.72332	5.77217	2.02193	5.6178	2.86275	18.5268	29.8766	5.62405	69.4113	102.171
5.58195	45.1842	69.6819	14.0078	84.7953	124.159	5.90367	-2.97685	-1.72531	5.77217	2.53215	5.6178	2.86639	18.7812	29.8745	5.62405	69.4113	102.171
5.5854	45.1827	69.6775	14.0216	84.786	124.132	5.91507	-2.72275	-1.7283	5.7759	2.53172	5.61653	2.86639	18.6772	29.5625	5.63133	68.6427	102.161
5.58887	44.7969	68.5201	14.0285	84.7814	124.118	5.91507	-3.23296	-1.7283	5.7759	2.53172	5.61653	2.87365	19.29	29.8703	5.63497	68.6411	102.156
5.59924	44.2817	68.5068	14.032	84.7791	124.111	5.91507	-2.97785	-1.7283	5.78708	2.53045	5.6127	2.87728	18.7791	29.8682	5.63861	68.6394	102.151
5.60616	44.0233	68.4979	14.0493	84.7674	124.076	5.91507	-3.48807	-1.7283	5.79454	2.5296	5.61015	2.87728	18.7791	29.8682	5.64952	68.6345	102.136
5.60616	44.0233	68.4979	14.0527	84.7651	124.069	5.91889	-2.87317	-1.41426	5.79454	2.5296	5.61015	2.88092	18.7784	29.8661	5.64952	68.6345	102.136
5.60962	44.0219	68.4936	14.0527	85.2759	124.069	5.91889	-3.48841	-1.72931	5.79454	2.5296	5.61015	2.88092	18.7784	29.8661	5.65316	69.7044	101.52
5.60962	44.0219	68.4936	14.07	85.4024	123.683	5.92264	-2.97851	-1.73029	5.79826	2.52917	5.60888	2.88092	18.7784	29.8661	5.65316	69.7044	101.52
5.60962	44.5327	68.4936	14.0769	85.3978	123.669	5.93022	-3.23429	-1.73228	5.80199	2.52875	5.60761	2.87365	18.7798	29.8703	5.6568	69.1414	102.127
5.61999	44.5283	68.4804	14.0804	85.1402	123.662	5.93022	-2.97918	-1.73228	5.80199	2.42223	5.28806	2.87728	18.6751	29.5562	5.66044	69.1397	102.122
5.61999	44.7837	68.4803	14.0838	85.2551	124.006	5.94544	-2.72541	-1.73627	5.80944	2.6765	5.28554	2.87728	18.42	29.5562	5.66771	69.2384	102.417
5.62345	44.7822	68.4759	14.1011	84.9666	124.674	5.94926	-2.9357	-2.36716	5.81689	2.67566	5.28302	2.88092	18.7784	29.8661	5.67499	69.4389	103.019
5.63037	44.6512	68.0828	14.108	84.9619	124.659	5.95302	-2.93602	-2.36812	5.82062	2.67524	5.28175	2.88092	18.5233	29.8661	5.67499	69.4389	103.019
5.63383	44.1389	68.0785	14.1184	84.955	124.639	5.96059	-2.72673	-1.74025	5.82435	2.67482	5.28049	2.88455	18.7777	29.864	5.68226	69.3337	102.703
5.63728	44.1374	68.074	14.1184	85.2104	124.639	5.96441	-2.98217	-1.74125	5.82807	2.46143	4.64032	2.89181	18.7763	29.8598	5.6859	69.332	102.698
5.64074	44.264	68.4538	14.1322	85.201	124.61	5.96441	-2.98217	-1.74125	5.82807	2.41929	5.27923	2.89545	18.7756	29.8577	5.6859	69.332	102.698
5.64766	44.3891	68.829	14.1357	85.0817	124.253	5.96824	-2.87754	-1.42737	5.82807	2.20632	4.64032	2.89545	18.7756	29.8577	5.68954	69.4836	102.388
5.65112	44.3876	68.8245	14.1564	84.9507	123.859	5.97199	-2.87787	-1.42837	5.82807	2.41929	5.27923	2.89908	18.7749	29.8556	5.70045	69.7337	102.373
5.65112	43.8768	68.8245	14.1599	84.9697	123.15	5.97199	-2.87787	-1.42837	5.83552	2.20549	4.63785	2.89908	18.7749	29.8556	5.70045	69.7337	102.373
5.65112	43.8768	68.8245	14.1599	85.2251	123.151	5.97581	-2.87821	-1.42939	5.8467	2.09779	4.31474	2.90271	18.7742	29.8535	5.70409	69.732	102.368
5.6615	43.8724	68.8112	14.1737	85.7052	123.825	5.98339	-2.56405	-0.486913	5.83925	2.09861	4.31719	2.90271	18.7742	29.8535	5.70409	69.6302	102.062
5.66495	43.8709	68.8067	14.1806	85.562	124.161	5.99096	-3.13466	-1.43341	5.85043	2.41677	5.27166	2.90634	18.7735	29.8514	5.70409	69.6302	102.062
5.66495	44.1263	68.8068	14.1841	85.3044	124.155	5.99096	-3.13466	-1.43341	5.85043	2.52323	5.59104	2.90998	18.7728	29.8493	5.70409	69.3751	102.062
5.66495	44.3817	68.8069	14.2082	85.2881	124.106	5.99096	-3.13466	-1.43341	5.85788	2.52238	5.58849	2.91361	18.7721	29.8472	5.71136	69.1167	102.052
5.66841	44.3802	68.8023	14.2082	85.2881	124.106	5.99479	-3.03007	-1.11964	5.86161	2.73485	6.22591	2.91361	18.876	30.1591	5.71136	69.3204	102.664
5.67533	44.6327	68.7935	14.2186	85.0257	124.084	5.99479	-3.28518	-1.11964	5.86161	2.73485	6.22591	2.91361	18.7721	29.8472	5.715	69.3188	102.659
5.68224	44.6297	68.7846	14.2186	84.7703	124.085	5.99479	-3.28518	-1.11964	5.86533	2.41509	5.26662	2.91361	18.7721	29.8472	5.715	68.8086	102.659
5.68224	44.6297	68.7847	14.2428	85.0094	124.036	5.99861	-3.28552	-1.12066	5.86533	2.41509	5.26662	2.91361	18.7721	29.8472	5.71864	68.705	102.348
5.68224	44.7578	69.1688	14.2532	85.0024	124.015	6.00236	-3.4957	-1.7512	5.87279	2.41424	5.26409	2.92088	18.7707	29.843	5.71864	68.9601	102.348
5.68224	45.1411	69.5527	14.2532	85.0025	124.015	6.01758	-3.49703	-1.75519	5.87279	2.41424	5.26409	2.92088	18.6667	29.5311	5.71864	68.9601	102.348
5.68224	45.1412	69.5528	14.2532	85.5131	124.015	6.02134	-2.98714	-1.75618	5.87651	2.41382	5.26283	2.92088	18.5156	29.843	5.74046	68.9502	102.318
5.68224	45.0131	69.1687	14.267	85.6207	124.337	6.02134	-2.98714	-1.75618	5.88024	2.4134	5.26157	2.92088	18.5156	29.843	5.74046	69.4604	102.318
5.6857	45.0117	69.1643	14.2705	85.6183	124.33	6.02516	-3.03279	-1.1278	5.88397	2.41298	5.26031	2.92088	18.5156	29.843	5.74411	69.4588	102.313
5.703	45.1322	69.526	14.2774	85.3584	124.316	6.02516	-3.2879	-1.1278	5.88397	2.41298	5.26031	2.92451	18.77	29.8409	5.74774	69.4571	102.309
5.703	44.366	69.526	14.2843	85.4706	124.653	6.02516	-3.3928	-1.44249	5.89887	2.4113	5.25527	2.92088	18.5156	29.843	5.74774	69.4571	102.309
5.70645	44.1086	68.7538	14.3085	85.3374	124.253	6.02516	-3.64791	-1.44249	5.89887	2.4113	5.25527	2.93178	18.6646	29.5249	5.74774	69.559	102.614
5.70645	45.0032	69.9052	14.3188	85.075	124.232	6.03274	-3.28858	-1.12984	5.90632	2.41046	5.25275	2.93541	18.7679	29.8346	5.75138	69.0471	102.609
5.71683	44.9987	69.8917	14.3188	85.075	124.232	6.04038	-3.39415	-1.44653	5.91005	2.41004	5.25148	2.93541	18.7679	29.8346	5.75501	68.7904	102.604
5.71683	44.9988	69.8919	14.3327	85.0656	124.204	6.04413	-2.88426	-1.44753	5.91005	1.89982	5.25148	2.93905	18.7672	29.8325	5.76229	68.7871	102.594
5.71683	44.8709	69.5081	14.3396	85.061	124.19	6.05553	-2.88527	-1.45056	5.91378	2.11218	5.88855	2.93905	18.7672	29.8325	5.76229	68.7871	102.594
5.71683	45.1263	69.5083	14.3465	85.173	124.527	6.05553	-2.63017	-1.45056	5.91378	2.11218	5.88855	2.93905	18.7672	29.8325	5.76957	69.294	102.584
5.72029	44.9969	69.1199	14.3534	85.5624	124.162	6.05553	-2.73503	-1.76514	5.91378	1.64429	5.25022	2.93905	18.7672	29.8325	5.77321	69.1905	102.274
5.72029	44.9968	69.1198	14.3603	85.5578	124.149	6.05553	-2.99013	-1.76514	5.91378	1.64429	5.25022	2.93905	18.7672	29.8325	5.77684	69.1385	101.353
5.73066	44.8644	68.7226	14.3707	85.9007	125.177	6.05936	-2.99047	-1.76615	5.92123	1.89856	5.2477	2.94268	18.5114	29.8304	5.77321	69.1401	101.357
5.73758	44.8615	68.7138	14.3776	85.8961	125.163	6.05936	-3.24558	-1.76615	5.92123	1.89856	5.2477	2.94631	18.7658	29.8283	5.77684	69.1385	101.353
5.74104	44.6047	68.7095	14.3915	85.8867	125.135	6.06311	-3.2459	-1.76713	5.93613	2.15199	5.24266	2.94631	18.5579	29.2048	5.78048	68.8818	101.348
5.7445	44.0923	68.7049	14.3949	85.8843	125.128	6.06311	-2.99079	-1.76713	5.94359	2.40626	5.24014	2.94631	18.7658	29.8283	5.78048	68.8818	101.348
5.7445	44.7311	69.0889	14.3949	85.8843	125.128	6.07451	-3.50201	-1.77012	5.94732	2.91605	5.23888	2.94631	18.6618	29.5165	5.78776	68.8785	101.338
5.7445	44.7311	69.0888	14.4122	85.8725	125.093	6.07451	-3.2469	-1.77012	5.95104	2.40542	5.23761	2.94994	18.8123	29.2027	5.78776	69.2857	102.559
5.74796	44.7296	69.0843	14.4191	85.6346	124.379	6.07833	-3.24723	-1.77112	5.95104	2.40542	5.23761	2.95358	19.1707	29.5123	5.79503	69.2824	102.549
5.75141	44.7281	69.0799	14.4191	85.3794	124.379	6.08973	-3.24823	-1.77411	5.9585	2.40458	5.23509	2.96084	18.9142	29.5082	5.79503	69.1806	102.244
5.75833	44.9806	69.071	14.4363	85.623	124.344	6.09348	-3.75878	-1.77509	5.9585	2.51091	5.55411	2.96084	18.9615	28.8847	5.79867	69.5358	102.545
5.76179	45.107	69.4503	14.4537	84.9617	124.659	6.09348	-3.24856	-1.77509	5.96222	2.51049	5.55283	2.96084	18.9615	28.8847	5.79867	69.2807	102.545
5.7687	44.8486	69.4414	14.4571	84.8428	124.302	6.09348	-2.99345	-1.77509	5.96967	2.40332	5.23131	2.96447	19.1686	29.5061	5.79867	69.2807	102.545
5.7687	45.104	69.4414	14.4675	85.4631	124.631	6.0973	-2.78415	-1.1472	5.97713	2.40248	5.22879	2.96447	18.4506	28.8827	5.80595	69.2774	102.535
5.7687	45.104	69.4414	14.4675	85.4631	124.63	6.10113	-2.99411	-1.77709	5.97713	2.40248	5.22879	2.97174	18.657	29.5019	5.81322	69.2741	102.525
5.77217	45.1026	69.437	14.4778	85.4561	124.61	6.1087	-2.99478	-1.77908	5.97713	2.91269	5.22879	2.97174	18.7609	29.8136	5.8205	69.2708	102.515
5.77908	44.7163	69.0444	14.4847	85.4514	124.595	6.11245	-2.9951	-1.78006	5.98085	2.65716	5.22753	2.96811	18.5065	29.8157	5.8205	69.2708	102.515
5.78254	45.3537	70.1905	14.4847	85.4514	124.595	6.11245	-2.9951	-1.78006	5.98085	2.86979	5.86541	2.96811	18.5065	29.8157	5.82777	69.1657	102.2
5.786	44.7131	68.2685	14.5021	85.4397	124.56	6.1201	-3.20535	-2.41081	5.98458	2.61425	5.86412	2.97174	18.5058	29.8136	5.82777	69.1657	102.2
5.786	44.7131	68.2686	14.5124	85.4327	124.539	6.1201	-3.20535	-2.41081	5.98458	2.61425	5.86412	2.97174	18.7609	29.8136	5.83505	69.9277	102.19
5.79291	44.7101	68.2597	14.5262	85.6786	124.511	6.12768	-2.69579	-2.41274	5.98458	2.61425	5.86412	2.97537	18.5051	29.8115	5.84232	69.9244	102.18
5.80329	44.7058	68.2466	14.5262	85.4458	123.813	6.12768	-2.69579	-2.41274	5.99576	2.40038	5.22249	2.97537	18.5051	29.8115	5.84232	70.0262	102.485
5.80329	44.7057	68.2464	14.5469	85.1763	123.77	6.1315	-3.20632	-2.41372	5.99948	2.39996	5.22123	2.97537	18.4012	29.4998	5.84596	70.1262	102.785
5.80329	44.7057	68.2464	14.5504	85.4069	124.462	6.13907	-3.20697	-2.41565	5.99948	2.29366	4.90235	2.97537	18.4012	29.4998	5.8496	69.3593	102.78
5.80675	44.7042	68.242	14.5538	85.4046	124.455	6.14665	-3.31237	-2.73187	6.01066	2.6538	5.21745	2.979	18.4005	29.4977	5.8496	69.3593	102.78
5.80675	44.7045	69.0089	14.5608	85.3999	124.441	6.14665	-3.31237	-2.73187	6.01066	2.6538	5.21745	2.979	18.4005	29.4977	5.85324	69.2559	102.47
5.80675	44.9598	69.0088	14.5781	85.5046	124.755	6.15047	-3.25354	-1.79003	6.01066	2.33497	4.26094	2.98264	18.3998	29.4956	5.86052	69.2526	102.46
5.81713	44.9554	68.9955	14.5884	85.7528	124.734	6.15047	-3.25354	-1.79003	6.01812	2.33415	4.25849	2.9899	18.7574	29.8031	5.86052	68.7424	102.46
5.81713	44.9554	68.9955	14.5884	85.7529	124.734	6.15423	-3.76408	-1.79101	6.02184	2.65254	5.21366	2.9899	18.6061	30.1147	5.86052	68.7424	102.46
5.82058	45.2092	68.9911	14.5953	85.981	125.418	6.15423	-3.76408	-1.79101	6.01812	2.07904	4.25849	2.99354	18.6054	30.1126	5.86052	68.4873	102.46
5.82404	45.4632	68.9867	14.6022	85.9763	125.404	6.16945	-3.25519	-1.795	6.02184	2.39743	5.21366	2.99354	18.5016	29.801	5.86779	68.484	102.45
5.8275	45.5895	69.3656	14.6126	86.2246	125.383	6.17702	-3.25585	-1.79698	6.02557	2.39701	5.2124	2.99717	18.6047	30.1105	5.87142	68.4823	102.445
5.83096	45.588	69.3613	14.6299	86.0965	124.999	6.17702	-3.25585	-1.79698	6.02557	2.39701	5.2124	2.99354	18.6054	30.1126	5.87507	68.4807	102.44
5.83442	45.5865	69.3568	14.6299	85.9801	124.649	6.17702	-3.36058	-2.11116	6.03675	2.39575	5.20862	2.99717	18.6521	29.4873	5.87507	69.5011	102.44
5.83442	45.5865	69.3568	14.6299	86.4909	124.649	6.17702	-3.25585	-1.79698	6.03675	2.39575	5.20862	3.0008	18.6514	29.4852	5.8787	69.3977	102.13
5.83787	45.3296	69.3523	14.6437	86.4816	124.621	6.17702	-3.76607	-1.79698	6.04047	2.60782	5.84484	3.00444	18.6507	29.4831	5.88234	69.6512	102.125
5.84479	45.5821	69.3434	14.6541	86.5909	124.949	6.1846	-3.25652	-1.79897	6.04793	2.60697	5.84226	3.00807	18.65	29.481	5.88597	69.6495	102.12
5.84825	45.1976	69.722	14.661	86.3307	124.935	6.18842	-3.21117	-2.42825	6.0442	2.39491	5.2061	3.00807	18.65	29.481	5.88962	69.4944	102.42
5.85171	45.1961	69.7175	14.6749	86.0659	124.907	6.18842	-3.46628	-2.42825	6.05538	2.64876	5.20232	3.00807	18.65	29.481	5.88962	69.2393	102.42
5.85171	44.9407	69.7176	14.6783	86.0636	124.9	6.19224	-3.4666	-2.42923	6.0591	2.39323	5.20106	3.01171	18.6493	29.4789	5.89325	69.2377	102.415
5.85517	44.9392	69.7131	14.6783	85.8081	124.9	6.196	-3.21181	-2.43018	6.06284	2.90303	5.1998	3.01171	18.6493	29.4789	5.89325	69.2377	102.415
5.86208	44.9362	69.7042	14.6956	85.9126	125.213	6.196	-3.46692	-2.43018	6.06284	2.69059	4.56248	3.01534	18.6486	29.4768	5.89689	69.236	102.411
5.86554	44.9347	69.6997	14.7025	85.5365	124.851	6.2074	-3.46789	-2.43309	6.07028	2.94487	4.56001	3.01534	18.6486	29.4768	5.90053	69.2861	101.795
5.86554	45.0625	70.0829	14.7197	85.6408	125.164	6.2074	-3.25851	-1.80494	6.07028	2.68976	4.56001	3.01534	18.6486	29.4768	5.91144	69.2812	101.781
5.869	44.9332	69.6952	14.7197	85.6409	125.164	6.21497	-4.0245	-1.80692	6.07028	2.68976	4.56001	3.01534	18.7525	29.7884	5.92236	69.2762	101.766
5.87246	44.9318	69.6908	14.7266	85.7754	124.801	6.21497	-4.0245	-1.80692	6.07401	2.94446	4.55878	3.01534	18.7525	29.7884	5.92236	69.2762	101.766
5.87246	45.1872	69.6908	14.744	85.7635	124.766	6.21879	-4.02483	-1.80792	6.08147	2.28451	4.87491	3.01534	18.7525	29.7884	5.92599	69.5795	102.676
5.88283	45.4382	70.4439	14.7543	86.2441	125.442	6.22262	-4.02516	-1.80892	6.07774	1.88092	5.19476	3.02624	17.985	29.7821	5.92599	69.5795	102.676
5.8863	45.1812	69.6729	14.7612	86.2395	125.427	6.22262	-3.81581	-1.18087	6.08147	1.8805	5.1935	3.02624	18.1363	29.4706	5.93327	69.6779	102.971
5.88283	45.0551	70.0607	14.7647	86.7479	125.42	6.23394	-3.51593	-1.81189	6.08891	2.02857	4.87241	3.02624	18.1363	29.4706	5.93327	69.5762	102.666
5.8863	44.9258	69.6729	14.7681	86.7456	125.414	6.23777	-3.26116	-1.81289	6.09637	1.87882	5.18846	3.02624	18.7029	30.4051	5.93327	69.5762	102.666
5.89667	45.0491	70.0427	14.7681	86.7455	125.413	6.24917	-3.26215	-1.81588	6.09637	1.87882	5.18846	3.02624	18.7029	30.4051	5.94418	69.5713	102.651
5.90013	44.9199	69.6551	14.7889	86.7313	125.371	6.24917	-3.26215	-1.81588	6.10382	2.02691	4.86742	3.02624	18.7029	30.4051	5.94782	69.6712	102.951
5.90013	44.9199	69.6551	14.8027	86.2111	125.343	6.25299	-3.26249	-1.81688	6.10382	1.92074	4.5489	3.02987	18.7022	30.403	5.94782	69.2129	102.341
5.90359	45.1737	69.6505	14.8027	85.9558	125.343	6.25299	-3.26249	-1.81688	6.10755	1.87756	5.18468	3.02987	18.7022	30.403	5.94782	69.468	102.341
5.90359	45.1738	69.6506	14.8062	85.9534	125.335	6.25299	-3.00738	-1.81688	6.10755	2.89799	5.18468	3.02987	18.4946	29.78	5.94782	69.2129	102.341
5.90704	45.683	69.6462	14.8303	86.1923	125.286	6.26056	-3.00804	-1.81886	6.11128	2.68524	4.54643	3.0335	18.4939	29.7779	5.94782	69.2129	102.341
5.90704	45.1723	69.6462	14.8303	86.1922	125.286	6.26056	-3.00804	-1.81886	6.115	2.89715	5.18216	3.03713	18.7008	30.3987	5.96601	69.2046	102.316
5.91396	45.68	69.6371	14.8407	86.1852	125.265	6.26432	-2.75326	-1.81984	6.11873	2.38651	5.18091	3.03713	18.7008	30.3987	5.96601	69.5613	102.621
5.92088	45.1663	69.6282	14.8442	86.2989	125.606	6.26814	-2.7536	-1.82085	6.12246	2.27994	4.86119	3.04077	18.7001	30.3966	5.96237	69.3079	102.626
5.92433	45.1648	69.6238	14.8511	86.2941	125.591	6.27954	-2.75459	-1.82383	6.12246	2.17379	4.54273	3.0444	18.6994	30.3945	5.96601	69.5613	102.621
5.9278	44.9079	69.6193	14.8649	86.4006	125.911	6.27954	-2.96382	-2.4515	6.12991	2.27911	4.85869	3.0444	18.5956	30.083	5.96601	69.5613	102.621
5.93125	44.9065	69.6149	14.8649	86.5168	126.259	6.28336	-3.21924	-2.45248	6.13736	2.27828	4.8562	3.0444	18.4918	29.7716	5.98056	69.5547	102.601
5.93817	44.7758	69.989	14.8718	86.512	126.245	6.27954	-3.47403	-2.4515	6.14481	2.89379	5.17209	3.05166	18.7455	29.7674	5.98783	69.8065	102.591
5.93817	44.7758	69.989	14.8822	86.5049	126.224	6.27954	-3.47403	-2.4515	6.14481	2.89379	5.17209	3.05166	18.7455	29.7674	5.98783	69.8065	102.591
5.94163	45.0296	69.9844	14.896	86.2634	125.499	6.28336	-3.47435	-2.45248	6.15227	2.59497	5.80628	3.05166	18.7455	29.7674	5.99148	69.5001	101.672
5.94509	45.6666	69.5969	14.8995	86.1451	125.144	6.28336	-3.57896	-2.7663	6.15227	2.59497	5.80628	3.0553	18.7448	29.7653	5.99511	69.6	101.972
5.94509	45.6666	69.597	14.9237	85.8967	124.399	6.28711	-3.26546	-1.82581	6.15599	2.59454	5.805	3.0553	18.5935	30.0767	5.99511	69.6	101.972
5.94509	45.6666	69.597	14.9306	86.1238	125.08	6.29469	-3.52124	-1.8278	6.15599	2.59454	5.805	3.06619	18.5914	30.0703	5.99511	69.0898	101.972
5.952	45.6636	69.588	14.9306	85.892	124.385	6.29851	-3.52157	-1.8288	6.15972	2.2329	5.48538	3.06619	18.5914	30.0703	6.00238	69.5447	102.571
5.96238	45.4037	69.5746	14.9409	85.885	124.364	6.30609	-3.26712	-1.83078	6.16717	2.48716	5.48284	3.06619	18.5914	30.0703	6.00238	69.2896	102.571
5.96238	45.1485	69.5747	14.9479	86.3674	125.045	6.31373	-3.26779	-1.83278	6.16717	2.23205	5.48284	3.06256	18.3845	29.4497	6.00966	69.2863	102.561
5.96583	45.147	69.5703	14.9479	86.4834	125.393	6.31373	-3.26779	-1.83278	6.17462	2.2312	5.48029	3.06256	17.8742	29.4497	6.00966	69.5414	102.561
5.96583	45.2746	69.953	14.9721	86.4668	125.343	6.31749	-3.26811	-1.83376	6.17462	2.33729	5.79857	3.06256	18.0818	30.0725	6.00966	69.5414	102.561
5.96583	45.4022	70.336	14.9755	86.4644	125.336	6.32889	-3.014	-1.83675	6.17462	1.57197	5.79857	3.06619	18.1287	29.4476	6.0133	69.4382	102.252
5.9693	45.2731	69.9487	14.9893	86.455	125.308	6.32889	-3.014	-1.83675	6.18208	1.57111	5.796	3.06619	17.6184	29.4476	6.0133	69.5397	102.556
5.97276	45.3993	70.3271	14.9962	86.7057	125.294	6.32889	-2.80489	-1.20941	6.18953	2.33558	5.79343	3.06619	18.1287	29.4476	6.0133	69.2846	102.556
5.97621	45.5252	70.705	14.9997	86.1925	125.287	6.33646	-2.80556	-1.21144	6.19326	2.33515	5.79215	3.06619	18.1287	29.4476	6.02058	69.2813	102.546
5.98313	45.3948	70.3136	14.9997	86.9587	125.287	6.33646	-3.26977	-1.83873	6.19698	2.07962	5.79086	3.06619	18.3838	29.4476	6.02785	69.278	102.536
5.98659	45.5208	70.6916	15.0101	86.9517	125.266	6.34411	-3.57158	-1.21349	6.19698	2.48377	5.47266	3.06619	18.3838	29.4476	6.03513	69.2747	102.526
5.98659	45.5207	70.6914	15.0274	86.9398	125.23	6.34411	-3.27044	-1.84073	6.19698	2.07962	5.79086	3.07709	18.1741	28.8186	6.03149	69.1748	102.227
5.98659	45.1381	69.5435	15.0343	86.935	125.216	6.34411	-3.52555	-1.84073	6.20443	2.07876	5.7883	3.08073	18.1734	28.8166	6.03513	69.1732	102.222
5.99005	45.1365	69.5389	15.0343	86.9351	125.216	6.34411	-3.78066	-1.84073	6.20443	2.22781	5.47012	3.08073	18.1734	28.8166	6.03877	69.273	102.522
6.00042	45.132	69.5254	15.0585	86.6632	125.166	6.34786	-3.78098	-1.84171	6.20817	2.22738	5.46884	3.08073	18.1734	28.8166	6.0424	69.0683	101.907
6.00388	45.1306	69.5211	15.0585	86.4077	125.166	6.35168	-3.52621	-1.84271	6.21189	2.22696	5.46757	3.08073	18.1734	28.8166	6.04604	69.2697	102.512
6.00734	45.6398	69.5165	15.0654	86.403	125.152	6.35168	-3.78132	-1.84271	6.21561	2.12049	5.14816	3.08073	18.6361	29.4392	6.04604	68.7595	102.512
6.00734	45.6398	69.5167	15.0723	86.3983	125.138	6.35544	-3.78165	-1.8437	6.21934	2.12007	5.1469	3.07709	18.3817	29.4413	6.05695	69.2647	102.497
6.0108	45.6383	69.5121	15.0827	86.3912	125.117	6.36308	-3.78231	-1.8457	6.21934	2.12007	5.1469	3.088	18.3796	29.4351	6.05695	69.2647	102.497
6.01426	45.6368	69.5076	15.093	86.6395	125.095	6.37448	-3.5282	-1.84868	6.2268	2.11923	5.14438	3.088	18.6909	30.369	6.06787	69.5149	102.482
6.01771	45.7629	69.8858	15.0999	86.6348	125.081	6.37448	-3.06407	-1.22164	6.23052	1.8637	5.14312	3.088	18.6909	30.369	6.0715	70.0234	102.477
6.03155	45.5015	69.868	15.1103	86.6277	125.06	6.38205	-2.70514	-0.910182	6.2417	1.86244	5.13935	3.088	18.5871	30.0577	6.07515	69.9203	102.167
6.03155	45.2465	69.103	15.1103	86.7433	125.407	6.38205	-2.70514	-0.910182	6.2417	1.86244	5.13935	3.09163	18.6902	30.3669	6.07878	69.765	102.467
6.03155	45.2462	69.8679	15.1172	86.4832	125.393	6.38205	-3.01864	-1.85066	6.2417	2.1805	6.0935	3.10616	18.5836	30.0471	6.07878	69.765	102.467
6.03155	45.2462	69.8679	15.1276	86.4761	125.371	6.38963	-3.0193	-1.85264	6.2417	1.41517	6.0935	3.10616	18.5836	30.0471	6.07878	69.765	102.467
6.035	45.2448	69.8636	15.1414	86.3269	125.69	6.38963	-3.12379	-2.16611	6.2417	1.30915	5.77545	3.10616	18.5836	30.0471	6.08605	69.7617	102.457
6.04193	44.9863	69.8545	15.1552	86.5728	125.661	6.38963	-3.12379	-2.16611	6.2417	1.30915	5.77545	3.10253	18.5843	30.0492	6.09333	70.0135	102.447
6.04884	44.9833	69.8455	15.1622	86.5681	125.647	6.39721	-3.12444	-2.16807	6.24543	1.30873	5.77417	3.10253	18.2731	29.1154	6.09333	70.0135	102.447
6.04884	44.9834	69.8456	15.1691	86.5633	125.633	6.4086	-3.12542	-2.17101	6.25288	1.30787	5.7716	3.0989	18.17	28.8062	6.09333	70.0135	102.447
6.04884	44.8558	69.4629	15.176	86.0478	125.619	6.4086	-3.12542	-2.17101	6.26033	2.07234	5.76903	3.10253	18.2731	29.1154	6.10061	70.0102	102.437
6.04884	44.8558	69.463	15.1794	86.5563	125.612	6.41618	-3.02161	-1.85959	6.26033	2.17834	6.08702	3.10253	18.2731	29.1154	6.10425	69.7534	102.432
6.0523	45.1097	69.4585	15.2036	86.5396	125.562	6.42	-3.02195	-1.86059	6.27151	2.17704	6.08313	3.10616	18.2724	29.1134	6.10788	69.7517	102.427
6.05576	45.3633	70.2192	15.2036	86.424	125.215	6.42	-3.27706	-1.86059	6.27524	2.07063	5.76389	3.10616	18.3761	29.4246	6.10788	69.8532	102.731
6.05576	45.3633	70.2192	15.214	86.4169	125.194	6.42	-3.27706	-1.86059	6.27524	2.83595	5.76389	3.11343	18.3747	29.4204	6.10788	69.7517	102.427
6.06613	45.3588	70.2057	15.2175	86.5301	125.533	6.42758	-3.27772	-1.86257	6.27524	2.07063	5.76389	3.10616	18.3761	29.4246	6.10788	69.8532	102.731
6.07305	45.6107	70.9614	15.2209	86.5277	125.526	6.42758	-3.27772	-1.86257	6.27896	5.38661	5.76261	3.11343	18.1196	29.4204	6.11516	70.0035	102.417
6.07305	45.866	70.9613	15.2244	86.27	125.519	6.42758	-3.48661	-2.48925	6.27896	2.58042	5.76261	3.11706	18.1189	29.4183	6.11516	69.2382	102.417
6.07305	45.6107	70.9613	15.252	85.7403	125.462	6.4314	-3.27805	-1.86357	6.27896	2.36847	5.12676	3.11706	18.0152	29.1071	6.11516	69.9021	102.113
6.07996	45.6077	70.9523	15.2555	85.7379	125.455	6.4428	-3.23279	-2.49313	6.28269	2.11294	5.1255	3.11343	18.0159	29.1092	6.1188	69.9004	102.108
6.07996	45.863	70.9523	15.2555	85.7379	125.455	6.45038	-3.23344	-2.49506	6.28269	2.11294	5.1255	3.11706	17.8077	28.4847	6.12971	69.8955	102.093
6.08343	45.4786	70.5652	15.2589	85.9908	125.448	6.45038	-3.23344	-2.49506	6.29387	1.85657	5.12172	3.12069	18.0621	28.4826	6.12971	69.333	102.701
6.08343	45.3513	70.1833	15.2728	85.9814	125.42	6.4542	-2.97866	-2.49604	6.2976	1.85615	5.12046	3.12432	18.2689	29.103	6.12971	69.333	102.701
6.09726	45.3453	70.1653	15.2866	86.2273	125.391	6.4542	-2.97866	-2.49604	6.2976	1.9621	5.43833	3.13159	18.2675	29.0988	6.13335	69.3314	102.696
6.09726	45.0899	70.1652	15.2935	86.2226	125.377	6.45795	-2.97898	-2.49699	6.30877	1.96083	5.43451	3.13522	18.2668	29.0967	6.13335	69.3314	102.696
6.09726	45.0899	70.1653	15.3004	86.2177	125.362	6.46177	-3.2807	-1.87151	6.31623	2.4702	5.43197	3.13522	18.2668	29.0967	6.13335	68.5661	102.696
6.09726	45.3453	70.1653	15.3073	86.9792	125.348	6.46935	-2.77115	-1.8735	6.31995	2.97999	5.4307	3.13522	18.0594	28.4744	6.14062	68.5627	102.686
6.11109	45.3393	70.1473	15.3108	87.0923	125.687	6.47693	-3.4908	-2.50183	6.31995	2.76813	4.79512	3.13522	18.3145	28.4744	6.14062	69.5309	103.295
6.11455	45.3378	70.1427	15.3177	87.0876	125.673	6.47693	-3.28202	-1.87548	6.32368	2.76772	4.79388	3.13522	18.3145	28.4744	6.15517	69.4228	102.971
6.11455	45.3378	70.1428	15.3453	87.0686	125.616	6.47693	-3.59519	-2.815	6.32368	2.40669	4.4761	3.13886	18.3138	28.4724	6.15517	68.9126	102.971
6.11455	45.8486	70.1429	15.3488	87.0662	125.609	6.48457	-3.59583	-2.81692	6.33113	1.74646	4.79139	3.13886	18.2661	29.0947	6.15517	69.1677	102.971
6.12146	45.3348	70.1338	15.3488	86.5554	125.609	6.48832	-3.59615	-2.81787	6.33113	1.95829	5.42689	3.14612	18.2647	29.0905	6.16609	69.1627	102.956
6.12146	45.5895	70.8979	15.3557	87.0614	125.595	6.49597	-3.08658	-2.81979	6.33486	1.95787	5.42562	3.14612	18.3685	29.4016	6.16973	69.161	102.951
6.12839	45.5871	70.1248	15.3695	87.052	125.566	6.49215	-3.08626	-2.81883	6.33858	1.85154	5.10662	3.14612	18.3685	29.4016	6.177	69.1577	102.941
6.12839	45.5872	70.1249	15.373	87.0495	125.559	6.49597	-3.13294	-2.19357	6.34604	1.59559	5.1041	3.14612	18.5198	29.0905	6.18064	69.4111	102.936
6.12839	45.5871	70.1247	15.3765	87.0471	125.552	6.49972	-2.87816	-2.19454	6.34976	1.85028	5.10284	3.15339	18.5185	29.0864	6.18064	69.4111	102.936
6.13184	45.5857	70.1204	15.3937	87.0353	125.516	6.49972	-3.0289	-1.88144	6.35349	1.84986	5.10159	3.15339	18.7736	29.0864	6.18428	69.6646	102.931
6.1353	45.3293	69.3514	15.3937	87.0353	125.516	6.5073	-3.53978	-1.88342	6.35349	1.33964	5.10159	3.15339	18.7736	29.0864	6.18428	69.6646	102.931
6.13876	45.3273	70.1113	15.411	86.6527	125.135	6.51494	-3.54044	-1.88542	6.34976	1.34006	5.10284	3.15339	18.7736	29.0864	6.18428	69.8673	103.539
6.15259	45.3214	70.0934	15.4214	86.7609	125.459	6.52252	-3.28599	-1.8874	6.35349	1.84986	5.10159	3.15339	18.7736	29.0864	6.18428	69.6122	103.539
6.15259	45.3214	70.0934	15.4352	86.7513	125.431	6.52252	-3.28599	-1.8874	6.35349	2.10497	5.10159	3.15339	18.7736	29.0864	6.19156	69.5075	103.225
6.15605	45.3199	70.0889	15.4387	86.7491	125.424	6.52252	-3.03088	-1.8874	6.35349	2.10497	5.10159	3.16065	18.7722	29.0822	6.19519	69.4045	102.916
6.15951	45.4457	70.4663	15.4456	86.9498	126.792	6.52634	-3.03122	-1.8884	6.37213	1.89113	4.46007	3.16065	18.262	29.0822	6.19883	69.5042	103.215
6.16297	45.4441	70.4616	15.4525	86.6897	126.778	6.53009	-3.28665	-1.88938	6.37213	2.10287	5.09529	3.16429	18.2613	29.0801	6.19883	69.5042	103.215
6.16297	45.4441	70.4617	15.4628	86.9379	126.757	6.53392	-3.28699	-1.89038	6.37213	2.20874	5.4129	3.16429	18.0539	28.458	6.21702	69.3945	102.886
6.16643	45.4426	70.4571	15.4766	86.6729	126.728	6.54532	-3.28798	-1.89336	6.37585	1.89072	4.45884	3.16429	18.0539	28.458	6.21702	69.8522	103.494
6.16989	45.4411	70.4527	15.4802	86.4401	126.029	6.54907	-3.28831	-1.89434	6.37958	1.95278	5.41036	3.17155	18.0525	28.4539	6.22066	69.8506	103.489
6.17334	45.4396	70.4482	15.4974	86.4281	125.993	6.54907	-3.28831	-1.89434	6.3833	1.44214	5.40909	3.17155	18.0525	28.4539	6.22066	69.8506	103.489
6.18372	45.4351	70.4347	15.4974	86.6835	125.993	6.55671	-3.28897	-1.89634	6.38703	1.44172	5.40782	3.17155	18.3076	28.4539	6.22066	69.6479	102.881
6.18372	45.6904	70.4346	15.5112	86.584	124.929	6.55671	-2.82526	-1.27052	6.38703	1.44172	5.40782	3.17519	18.7694	29.0739	6.22429	69.6462	102.876
6.18718	45.6889	70.4301	15.5216	86.5768	124.907	6.56047	-2.77909	-1.89732	6.39076	1.4413	5.40655	3.17519	18.5143	29.0739	6.23157	69.2865	102.562
6.18718	45.1782	70.4301	15.5216	86.9222	125.943	6.56429	-2.82593	-1.27255	6.40566	2.20493	5.40147	3.17519	18.5143	29.0739	6.23157	69.0838	101.954
6.19756	45.1737	70.4167	15.5285	86.5722	124.893	6.56429	-2.82593	-1.27255	6.40566	2.20493	5.40147	3.17882	18.7687	29.0718	6.23157	69.0838	101.954
6.19756	45.1737	70.4166	15.5285	86.6873	125.239	6.57187	-2.82661	-1.27458	6.40566	2.20493	5.40147	3.18972	18.7667	29.0656	6.23521	69.0822	101.949
6.19756	45.301	70.7986	15.5424	86.6777	125.21	6.57187	-3.29029	-1.90029	6.40566	2.41659	6.03646	3.18972	18.5115	29.0656	6.23521	69.0822	101.949
6.19756	45.8117	70.7986	15.5562	86.6682	125.181	6.57569	-3.29062	-1.90129	6.41311	2.41573	6.03387	3.18972	18.5115	29.0656	6.23885	69.3356	101.944
6.20447	45.8087	70.7895	15.57	87.1695	125.153	6.57944	-3.29095	-1.90227	6.41684	2.20366	5.39766	3.18609	18.2571	29.0677	6.24248	69.334	101.939
6.20793	46.318	70.785	15.57	87.2844	125.498	6.58326	-3.29128	-1.90327	6.41684	2.20366	5.39766	3.18609	18.0498	28.4457	6.24248	69.6379	102.851
6.21139	46.1892	70.3986	15.5734	86.8864	125.836	6.58326	-3.6041	-2.84173	6.41684	2.09784	5.0802	3.18609	18.0498	28.4457	6.2534	69.5316	102.532
6.21485	45.9323	70.3941	15.5872	86.877	125.808	6.59084	-3.60474	-2.84364	6.41684	1.8862	4.44528	3.18972	18.2564	29.0656	6.25703	69.3761	102.831
6.2183	45.9308	70.3895	15.6046	86.75	125.427	6.59466	-3.5008	-2.53181	6.42802	2.14007	4.44158	3.18972	18.8144	28.4436	6.25703	69.3761	102.831
6.2183	45.9308	70.3896	15.6115	86.8602	125.757	6.59466	-3.5008	-2.53181	6.42802	2.14007	4.44158	3.19335	19.0211	29.0635	6.26067	69.2732	102.522
6.22176	45.8012	70.767	15.6115	86.8602	125.757	6.59842	-3.50112	-2.53277	6.42802	2.14007	4.44158	3.19699	18.7653	29.0614	6.27158	69.2682	102.507
6.22176	45.8012	70.767	15.6149	87.0879	126.441	6.60224	-3.03783	-1.90823	6.43175	2.13966	4.44035	3.19699	18.7653	29.0614	6.27158	69.2682	102.507
6.23559	45.7952	70.7489	15.6218	87.0832	126.426	6.62121	-3.29459	-1.91319	6.4392	2.24464	4.75527	3.20788	18.7632	29.0552	6.27522	69.2665	102.502
6.23559	45.7951	70.7488	15.6356	86.5627	126.397	6.62121	-3.29459	-1.91319	6.44665	2.20027	5.38749	3.20788	18.7632	29.0552	6.28613	69.3628	102.791
6.23559	45.7952	70.7489	15.653	86.5762	125.672	6.62121	-3.29459	-1.91319	6.45783	2.199	5.38368	3.20788	18.7632	29.0552	6.28613	69.3628	102.791
6.23559	45.7952	70.7489	15.6599	86.5714	125.657	6.62503	-3.29492	-1.91419	6.46156	2.19857	5.38241	3.20425	18.7639	29.0573	6.28613	69.3628	102.791
6.24597	45.7906	70.7353	15.6633	86.569	125.65	6.62503	-3.29492	-1.91419	6.46156	2.19857	5.38241	3.20062	18.6609	28.7484	6.28977	69.3612	102.786
6.24597	45.7906	70.7353	15.6702	86.9347	125.981	6.62503	-3.55003	-1.91419	6.46528	2.19815	5.38114	3.20062	18.6609	28.7484	6.29341	69.562	103.388
6.24597	45.7906	70.7352	15.6702	87.0496	126.325	6.62503	-3.34158	-1.28883	6.46528	2.09239	5.06385	3.20425	18.4051	28.7464	6.29705	69.6129	102.776
6.24943	45.7891	70.7308	15.6771	87.0448	126.311	6.62879	-3.34191	-1.28983	6.46901	2.09197	5.06259	3.21152	18.4038	28.7422	6.29705	69.5603	103.383
6.25289	45.6604	70.3446	15.6978	87.0305	126.268	6.63261	-3.55069	-1.91617	6.47273	2.09155	5.06133	3.21152	18.3559	29.3641	6.30069	69.5586	103.378
6.26326	45.5287	69.9496	15.7047	87.2553	126.943	6.63643	-3.55103	-1.91717	6.47273	2.09155	5.06133	3.21515	18.3552	29.362	6.30796	69.0491	101.85
6.26326	45.7831	70.7127	15.7047	87.2554	126.943	6.64401	-3.55168	-1.91914	6.47646	1.3258	5.06007	3.21515	18.3552	29.362	6.3116	69.3026	101.845
6.26326	45.7831	70.7126	15.7152	87.1333	126.577	6.64401	-3.29657	-1.91914	6.48391	2.19603	5.37479	3.21515	18.5067	29.0511	6.31524	69.6046	102.751
6.26326	45.7831	70.7128	15.7221	87.1285	126.562	6.64401	-3.35408	-2.85699	6.48764	1.43029	5.37352	3.21515	18.5067	29.0511	6.32252	69.6013	102.741
6.26672	46.037	70.7082	15.7462	86.7416	126.168	6.64783	-3.3544	-2.85795	6.48764	1.43029	5.37352	3.21515	18.5067	29.0511	6.32252	69.6013	102.741
6.28056	46.2864	70.6901	15.7462	86.7416	126.168	6.65158	-3.29723	-1.92112	6.49137	2.40666	6.00666	3.21515	18.3552	29.362	6.32979	69.5979	102.731
6.28402	46.2848	70.6855	15.7531	86.8773	125.809	6.65158	-3.55234	-1.92112	6.4951	2.40623	6.00537	3.22605	18.4568	29.6666	6.32979	69.5979	102.731
6.28402	46.4121	71.0672	15.767	86.8678	125.78	6.65541	-3.55268	-1.92212	6.4951	2.19476	5.37098	3.22605	17.6914	29.6666	6.32979	69.3428	102.731
6.28747	46.4106	71.0627	15.7739	86.9777	126.11	6.66298	-3.55334	-1.9241	6.50628	2.08777	5.05001	3.22605	18.4568	29.6666	6.32979	69.3428	102.731
6.28747	46.4106	71.0627	15.7808	86.973	126.096	6.66298	-3.5066	-2.54921	6.51	2.08736	5.04876	3.22968	18.2488	29.0428	6.33707	69.3395	102.721
6.28747	46.028	70.6811	15.7877	86.9683	126.082	6.67438	-3.50756	-2.55211	6.51373	2.08694	5.0475	3.23331	18.2481	29.0407	6.33707	69.3395	102.721
6.29785	46.0235	70.6676	15.7912	87.0806	126.419	6.6782	-3.61205	-2.86558	6.51373	2.59715	5.0475	3.23331	18.2481	29.0407	6.33707	69.3395	102.721
6.30476	45.6379	70.277	15.805	87.071	126.39	6.6782	-3.61205	-2.86558	6.51745	2.08652	5.04624	3.23331	18.2481	29.0407	6.3407	69.3378	102.716
6.30476	45.6378	70.2769	15.805	87.071	126.39	6.68196	-3.29988	-1.92906	6.51745	1.83141	5.04624	3.23331	18.2481	29.0407	6.3407	68.8276	102.716
6.30476	45.6379	70.277	15.8258	86.9419	126.002	6.69336	-3.30087	-1.93203	6.52118	1.57588	5.04498	3.23331	18.7583	29.0407	6.35162	68.8226	102.701
6.30476	45.7651	70.6586	15.8327	87.0518	126.332	6.69336	-3.04576	-1.93203	6.52491	1.83057	5.04373	3.24058	18.757	29.0365	6.35525	68.821	102.696
6.30476	45.7651	70.6586	15.8361	87.0493	126.325	6.69336	-2.79066	-1.93203	6.52491	1.83057	5.04373	3.24058	18.757	29.0365	6.36253	69.3278	102.686
6.32206	45.8847	71.0174	15.8396	87.2764	127.006	6.70858	-2.79199	-1.93601	6.53609	1.82931	5.03996	3.24421	18.7563	29.0345	6.36981	69.5796	102.676
6.32206	46.0129	70.6359	15.8637	87.1449	126.611	6.70858	-2.79199	-1.93601	6.53981	2.44479	5.35574	3.24421	18.2461	29.0345	6.37344	69.5779	102.671
6.32897	46.1371	71.0084	15.8672	87.1426	126.604	6.71615	-3.04775	-1.93799	6.53981	2.44479	5.35574	3.24421	18.2461	29.0345	6.37344	69.5779	102.671
6.32897	46.137	71.0083	15.8706	87.0254	126.253	6.71991	-3.04807	-1.93897	6.53981	2.12775	4.40462	3.24785	18.1975	29.654	6.37708	69.3212	102.666
6.32897	46.137	71.0083	15.888	87.1281	126.561	6.72373	-3.0484	-1.93996	6.55099	2.44352	5.35193	3.24785	18.2454	29.0324	6.38072	69.4207	102.964
6.33243	45.8801	71.0038	15.888	87.2688	126.217	6.72373	-3.30351	-1.93996	6.55099	2.33785	5.03493	3.25148	18.3483	29.3411	6.37708	69.4223	102.969
6.33589	45.8786	70.9993	15.8914	87.2664	126.21	6.72373	-3.0484	-1.93996	6.56217	1.82638	5.03116	3.25148	18.2447	29.0303	6.38436	69.5202	103.263
6.33589	45.8786	70.9992	15.9087	87.2544	126.174	6.72373	-3.0484	-1.93996	6.56217	1.82638	5.03116	3.25511	18.244	29.0282	6.38799	69.6724	102.954
6.34626	46.2553	72.1294	15.9156	87.1089	126.503	6.72373	-2.7933	-1.93996	6.5659	1.82596	5.0299	3.25875	18.2433	29.0262	6.40254	69.5646	102.631
6.34972	46.2538	72.1249	15.9225	87.3331	127.176	6.72755	-3.55896	-1.94096	6.5659	1.57085	5.0299	3.25875	17.478	29.0262	6.40254	69.5646	102.631
6.35319	46.2523	72.1202	15.9328	87.326	127.155	6.73891	-3.30484	-1.94393	6.56962	1.67608	5.34558	3.25875	17.478	29.0262	6.40618	70.1743	102.929
6.35319	46.2523	72.1203	15.9363	87.0945	126.46	6.74272	-3.30517	-1.94492	6.56962	1.93119	5.34558	3.26238	18.2426	29.0241	6.40618	70.0732	102.626
6.35319	46.2523	72.1203	15.9433	87.3187	127.133	6.75031	-3.30583	-1.9469	6.56962	1.93119	5.34558	3.26238	17.4773	29.0241	6.40982	69.6624	102.924
6.35664	46.2507	72.1156	15.9536	87.4524	126.768	6.75031	-3.30583	-1.9469	6.57707	2.14162	5.97688	3.26238	17.9875	29.0241	6.40982	69.6624	102.924
6.35664	46.1237	71.7344	15.9674	87.4428	126.739	6.7541	-3.30616	-1.94789	6.5808	1.92992	5.34177	3.26601	17.9868	29.022	6.40982	69.6624	102.924
6.36702	45.7379	70.5772	15.9778	87.4356	126.717	6.7579	-3.30649	-1.94889	6.5808	1.92992	5.34177	3.26965	17.9861	29.0199	6.4171	69.3029	102.611
6.37048	45.4811	70.5727	15.9778	87.4356	126.717	6.7617	-3.30682	-1.94988	6.58453	1.67439	5.3405	3.26965	17.9861	29.0199	6.42073	69.4023	102.909
6.37393	45.862	70.9493	15.9916	86.8534	124.971	6.7617	-3.81704	-1.94988	6.58825	1.67397	5.33924	3.26965	17.9861	29.0199	6.42801	69.6541	102.899
6.37393	45.862	70.9495	16.0055	86.8439	124.942	6.76549	-3.81737	-1.95087	6.60316	1.67227	5.33416	3.26965	17.9861	29.0199	6.42801	69.553	102.596
6.37393	46.1174	70.9494	16.0089	86.8415	124.935	6.76929	-4.07281	-1.95186	6.60316	1.67227	5.33416	3.28054	18.2391	29.0137	6.43528	69.6507	102.889
6.37739	46.1159	70.9449	16.0124	87.1825	125.958	6.77688	-4.07347	-1.95384	6.60316	1.92738	5.33416	3.28054	18.2391	29.0137	6.43528	69.6507	102.889
6.38431	46.3669	71.6979	16.0158	87.1802	125.951	6.77688	-3.81836	-1.95384	6.60688	1.92696	5.33289	3.28054	18.032	28.3923	6.43528	69.5496	102.586
6.38777	46.3654	71.6933	16.0331	87.1682	125.915	6.78068	-3.36552	-2.89131	6.61061	1.92653	5.33162	3.28418	18.2385	29.0116	6.44256	69.5463	102.576
6.38777	46.3654	71.6934	16.04	87.3923	126.587	6.78068	-3.11042	-2.89131	6.61434	1.60932	4.37998	3.28418	18.2385	29.0116	6.44256	69.2912	102.576
6.39122	46.2369	71.3079	16.0504	87.385	126.566	6.78827	-3.11105	-2.89321	6.61434	1.60932	4.37998	3.28781	18.748	29.0095	6.4462	70.0548	102.571
6.39469	46.4894	72.0654	16.0504	87.2707	126.223	6.79586	-3.36679	-2.89512	6.61806	1.60891	4.37875	3.28781	18.748	29.0095	6.45348	70.0515	102.561
6.4016	46.2309	72.0561	16.0642	87.0056	126.194	6.79967	-3.41415	-2.27188	6.62179	1.86361	4.37752	3.29144	18.7473	29.0075	6.45348	69.2862	102.561
6.40506	46.2294	72.0517	16.0677	87.2586	126.186	6.79967	-3.56523	-1.95979	6.62552	2.11831	4.37629	3.29144	17.982	29.0075	6.45348	69.2862	102.561
6.41198	46.0993	71.6614	16.0849	87.7573	126.15	6.80726	-3.56589	-1.96177	6.62552	2.43506	5.32654	3.29144	18.2371	29.0075	6.46075	69.2829	102.551
6.41544	45.9695	72.0379	16.0918	87.7525	126.136	6.81105	-3.56622	-1.96276	6.62924	2.1179	4.37506	3.29144	18.2371	29.0075	6.46803	69.2795	102.541
6.41889	46.0963	71.6522	16.0953	87.6357	125.786	6.81485	-3.56655	-1.96375	6.62924	2.43464	5.32527	3.29144	17.982	29.0075	6.46803	69.3806	102.844
6.41889	45.9694	71.2716	16.1091	87.7405	126.1	6.81485	-3.56655	-1.96375	6.63669	1.818	5.00602	3.29144	18.2371	29.0075	6.46803	69.3806	102.844
6.42235	46.2232	71.2669	16.1195	87.7332	126.078	6.81485	-3.31144	-1.96375	6.64043	1.81758	5.00476	3.30597	18.3378	29.3098	6.4753	69.3773	102.834
6.42581	46.4771	71.2624	16.123	87.2202	126.071	6.81485	-3.56655	-1.96375	6.64415	1.81716	5.00351	3.30597	18.848	29.3098	6.47894	69.6307	102.829
6.42927	46.4756	71.2579	16.1299	86.9868	125.371	6.81485	-3.31144	-1.96375	6.64788	1.56164	5.00225	3.3096	18.8474	29.3077	6.47894	69.6307	102.829
6.43965	46.4711	71.2442	16.1506	87.201	126.013	6.83383	-3.31309	-1.9687	6.65533	1.5608	4.99974	3.3096	18.8474	29.3077	6.48985	69.3706	102.814
6.43965	46.598	71.6249	16.161	87.3081	126.335	6.83383	-3.31309	-1.9687	6.65533	1.5608	4.99974	3.31324	18.3364	29.3056	6.48985	69.5727	103.42
6.4431	46.3411	71.6204	16.161	87.3081	126.335	6.83383	-3.31309	-1.9687	6.65533	1.5608	4.99974	3.31324	18.3364	29.3056	6.49349	69.571	103.415
6.4431	46.468	72.0012	16.1679	86.7925	126.32	6.84142	-3.31375	-1.97068	6.66651	1.55954	4.99597	3.31324	18.5435	29.9268	6.49713	69.3673	102.804
6.4431	46.4681	72.0014	16.1748	86.7877	126.306	6.84523	-3.31408	-1.97167	6.67024	2.06934	4.99471	3.31324	18.5435	29.9268	6.49713	69.3673	102.804
6.44656	46.3395	71.6158	16.1852	87.0358	126.284	6.84523	-3.31408	-1.97167	6.67396	1.24212	4.04369	3.31324	18.0813	29.3056	6.5044	69.3639	102.794
6.45348	46.3365	71.6066	16.199	87.0262	126.255	6.84523	-3.31408	-1.97167	6.67396	1.75234	4.04369	3.31324	17.9778	28.995	6.50804	69.3623	102.789
6.45348	46.3365	71.6067	16.2024	87.0239	126.248	6.86041	-3.57052	-1.97564	6.67396	2.06892	4.99345	3.31687	17.9771	28.9929	6.50804	69.1072	102.789
6.46039	46.3335	71.5976	16.2128	87.0166	126.226	6.86041	-3.31541	-1.97564	6.67769	1.55829	4.9922	3.3205	17.9764	28.9909	6.51168	69.1055	102.784
6.47077	46.0735	71.584	16.2197	87.4956	126.897	6.86421	-3.31574	-1.97663	6.67769	1.55829	4.9922	3.31687	17.9771	28.9929	6.51168	69.8177	103.39
6.47077	45.8182	71.5838	16.2197	87.6366	126.554	6.868	-3.06096	-1.97762	6.68141	1.55787	4.99094	3.3205	18.2315	28.9909	6.51895	69.3042	103.38
6.47423	46.072	71.5794	16.2336	87.1163	126.526	6.8756	-3.06162	-1.9796	6.68141	1.55787	4.99094	3.31687	18.2322	28.9929	6.51895	69.2032	103.077
6.48115	45.9421	71.1898	16.2439	86.995	126.162	6.8756	-3.06162	-1.9796	6.68141	1.55787	4.99094	3.3205	18.2315	28.9909	6.52259	68.7444	102.466
6.48461	45.6853	71.1851	16.2508	87.2455	126.147	6.8756	-3.06162	-1.9796	6.68887	1.55703	4.98843	3.3205	18.2315	28.9909	6.52987	68.842	102.759
6.48461	45.9406	71.1852	16.2681	87.2335	126.111	6.8756	-3.57184	-1.9796	6.69632	1.55619	4.98592	3.32777	18.2301	28.9867	6.53714	68.7377	102.446
6.48461	46.4514	71.1851	16.2716	86.7203	126.104	6.8756	-3.36394	-1.35592	6.70377	1.55535	4.9834	3.3205	18.2315	28.9909	6.53714	69.7581	102.446
6.48461	46.4514	71.1852	16.2716	87.2312	126.104	6.87939	-4.08239	-1.98059	6.7075	1.55494	4.98215	3.32777	18.2301	28.9867	6.54078	70.0115	102.441
6.48806	46.4499	71.1807	16.2785	87.1122	125.747	6.88319	-4.08272	-1.98158	6.71122	1.55452	4.98089	3.33504	17.9737	28.9826	6.53714	70.1142	102.749
6.48806	46.7053	71.1807	16.2923	87.3307	126.403	6.88698	-3.67676	-2.29437	6.71868	1.55368	4.97838	3.33504	17.4634	28.9826	6.54078	69.7564	102.441
6.49844	46.4453	71.167	16.3027	87.3234	126.381	6.89078	-3.67709	-2.29535	6.71868	1.55368	4.97838	3.33504	17.4634	28.9826	6.54078	69.4535	101.532
6.49844	46.4453	71.1669	16.3061	87.321	126.374	6.89458	-4.18763	-2.29632	6.7224	1.55326	4.97712	3.33504	17.4634	28.9826	6.54806	67.4093	101.522
6.49844	46.4454	71.1671	16.3165	87.3139	126.352	6.90217	-4.18828	-2.29828	6.7224	1.55326	4.97712	3.3314	17.4641	28.9846	6.54806	67.5103	101.825
6.51227	46.1839	71.1488	16.3165	87.3139	126.352	6.90597	-4.18861	-2.29926	6.72986	1.34149	4.34182	3.3314	17.4641	28.9846	6.55169	69.8046	101.82
6.51227	46.4376	71.9099	16.3338	87.3019	126.316	6.90977	-4.08503	-1.98851	6.73358	1.2969	4.97336	3.3314	18.2295	28.9846	6.55897	70.0032	102.416
6.51573	46.436	71.9052	16.3442	87.2946	126.294	6.91735	-4.08569	-1.99049	6.73358	1.34108	4.34059	3.33867	18.2281	28.9805	6.56261	69.5923	102.714
6.51573	46.436	71.9053	16.3511	87.4038	126.622	6.92116	-3.42458	-2.30317	6.73358	1.34108	4.34059	3.34594	18.2267	28.9763	6.56624	69.5906	102.709
6.51573	46.1824	71.1443	16.3684	87.3917	126.586	6.92495	-3.42491	-2.30414	6.74103	1.23481	4.02177	3.34594	18.4818	28.9763	6.56624	69.0804	102.709
6.52611	46.1778	71.1306	16.3684	87.3918	126.586	6.92495	-3.68002	-2.30414	6.74103	1.23481	4.02177	3.34957	18.4811	28.9743	6.56989	69.1797	103.007
6.52956	45.9209	71.1261	16.3684	87.3917	126.586	6.92875	-3.68034	-2.30512	6.74849	1.234	4.01933	3.34957	18.4811	28.9743	6.57352	68.822	102.699
6.52956	46.1745	71.887	16.3787	87.3845	126.564	6.93254	-3.88844	-2.9294	6.74849	1.33944	4.33566	3.3532	18.4804	28.9722	6.57716	68.8203	102.694
6.52956	45.9209	71.1261	16.3995	87.3699	126.52	6.93254	-3.57679	-1.99445	6.75221	1.33903	4.33443	3.35684	18.2246	28.9701	6.58807	68.8153	102.679
6.53648	46.4269	71.878	16.4029	87.3676	126.513	6.94773	-3.37037	-1.37521	6.75594	1.59373	4.3332	3.35684	18.2246	28.9701	6.58807	68.7144	102.376
6.53994	46.4253	71.8732	16.4029	87.3676	126.513	6.94773	-3.37037	-1.37521	6.76339	1.69834	4.64703	3.36047	18.2239	28.968	6.58807	68.7144	102.376
6.54685	46.1687	71.1034	16.4098	87.3627	126.499	6.94773	-3.57811	-1.99841	6.75967	1.69875	4.64827	3.36047	18.3274	29.2785	6.59534	68.9662	102.366
6.55032	46.1672	71.0988	16.434	87.4598	126.79	6.95153	-3.57844	-1.9994	6.76339	1.44323	4.64703	3.36047	18.3274	29.2785	6.59534	68.9662	102.366
6.55723	46.5463	71.4699	16.434	87.3458	126.448	6.95153	-3.57844	-1.9994	6.77458	1.5474	4.95954	3.36047	18.0723	29.2785	6.59534	68.7111	102.366
6.55723	46.5463	71.47	16.434	87.3459	126.448	6.96291	-3.57943	-2.00237	6.77458	1.5474	4.95954	3.36773	18.0709	29.2743	6.59899	68.9645	102.361
6.55723	46.6731	71.8504	16.4444	87.3386	126.426	6.96291	-3.32432	-2.00237	6.78576	1.54614	4.95577	3.37137	18.0702	29.2722	6.60626	68.9612	102.351
6.55723	46.9285	71.8504	16.4513	87.3338	126.412	6.96291	-3.32432	-2.00237	6.78576	1.29104	4.95577	3.37137	18.0702	29.2722	6.6099	68.9595	102.346
6.55723	46.9286	71.8505	16.4686	87.5771	126.376	6.97051	-3.32498	-2.00435	6.78576	0.780819	4.95577	3.37137	18.0702	29.2722	6.61354	68.9578	102.341
6.56069	47.1824	71.8459	16.4686	87.577	126.376	6.9781	-3.11797	-1.38333	6.78576	0.780819	4.95577	3.37137	18.2771	29.893	6.61718	68.9562	102.336
6.57107	46.4117	71.8322	16.479	87.6837	126.696	6.9819	-3.37342	-1.38435	6.78576	1.54614	4.95577	3.37137	18.0702	29.2722	6.62445	69.0537	102.629
6.57107	46.4116	71.8321	16.4859	87.6789	126.681	6.9819	-3.26959	-1.07286	6.79321	1.43991	4.63708	3.37137	18.0702	29.2722	6.62809	69.3072	102.624
6.57798	46.4086	71.823	16.5135	87.6594	126.623	6.9819	-3.26959	-1.07286	6.79321	1.54531	4.95326	3.37137	18.0702	29.2722	6.62809	69.3072	102.624
6.5849	46.9163	71.8138	16.517	87.657	126.616	6.9857	-3.58141	-2.00831	6.79321	1.54531	4.95326	3.37863	18.0688	29.268	6.63536	69.3038	102.614
6.5849	46.4055	71.8138	16.5204	87.6546	126.608	6.98949	-3.58173	-2.00929	6.80066	1.54447	4.95075	3.37863	18.0688	29.268	6.63536	69.3038	102.614
6.5849	46.6609	71.8138	16.5239	87.1415	126.601	6.98949	-3.83684	-2.00929	6.80439	1.54405	4.9495	3.37863	18.0688	29.268	6.63536	69.3038	102.614
6.59528	46.6564	71.8002	16.5377	87.1319	126.572	6.99329	-3.83717	-2.01028	6.80811	1.54363	4.94824	3.37863	18.0688	29.268	6.639	69.3022	102.609
6.59528	46.401	71.8001	16.5515	87.6329	126.543	6.99329	-3.83717	-2.01028	6.80811	1.69337	4.63211	3.37863	18.0688	29.268	6.639	69.0471	102.609
6.59873	46.3994	71.7955	16.555	87.6304	126.536	7.00468	-3.83816	-2.01325	6.81929	1.54238	4.94447	3.38226	18.0681	29.266	6.64264	69.0454	102.604
6.59873	46.3995	71.7956	16.5584	87.6281	126.529	7.00847	-3.83849	-2.01424	6.82302	1.54196	4.94322	3.38226	18.0681	29.266	6.64628	69.0437	102.599
6.59873	46.3995	71.7957	16.5688	87.6207	126.507	7.00847	-3.58338	-2.01424	6.81929	1.43701	4.62838	3.38953	18.0667	29.2618	6.65355	69.2955	102.589
6.61257	46.3934	71.7773	16.5792	87.6135	126.485	7.01227	-3.3286	-2.01523	6.8342	1.7514	5.57154	3.39679	18.0653	29.2576	6.65719	69.2938	102.584
6.61602	46.3918	71.7727	16.5861	87.8642	126.471	7.01227	-3.3286	-2.01523	6.8342	1.7514	5.57154	3.40043	18.0646	29.2555	6.66083	69.5473	102.579
6.61948	46.3903	71.7681	16.5861	87.6087	126.471	7.01986	-3.32926	-2.01721	6.83047	1.54112	4.94071	3.40043	18.2715	29.8761	6.6681	70.0541	102.569
6.61948	46.3903	71.7681	16.5965	87.8568	126.449	7.02366	-3.22581	-1.70686	6.83047	1.43577	4.62465	3.40043	18.2715	29.8761	6.6681	69.7516	101.661
6.62295	46.3888	71.7636	16.6034	87.852	126.435	7.02746	-3.37748	-1.39653	6.8342	1.43536	4.62341	3.40043	18.0646	29.2555	6.67174	69.2397	101.656
6.6264	46.6427	71.759	16.6103	87.8472	126.42	7.03505	-3.88838	-1.39856	6.84538	1.17901	4.61968	3.40406	18.0639	29.2534	6.67538	69.4932	101.651
6.6264	46.898	71.7589	16.6276	87.5796	126.383	7.03884	-3.6336	-1.39957	6.8491	0.923483	4.61844	3.40769	18.0632	29.2513	6.67538	69.6948	102.256
6.63332	47.0197	72.8902	16.638	87.5724	126.362	7.03884	-3.73737	-1.71086	6.8491	0.923483	4.61844	3.40769	18.0632	29.2513	6.67538	69.6948	102.256
6.63332	46.3842	71.7499	16.638	87.7996	127.043	7.04265	-3.84146	-2.02315	6.8491	0.923483	4.61844	3.40769	18.0632	29.2513	6.67902	69.2838	102.554
[truncated: 9,599 more rows]
